# Supplementary material for: Epidemiological and ecological determinants of Zika virus transmission in an urban setting
Source: eLife journal article supplement (doi:10.7554/elife.29820), 2017-09-05
Supplement: supp [file elife-29820-supp-v1.zip]

Archive with 11 entries (11 files):
- elife_poa_e29820_Dataset_4.xls
- elife_poa_e29820_Supplementary_File_5.csv
- elife_poa_e29820_Supplementary_File_4.csv
- elife_poa_e29820_Dataset_2.xls
- elife_poa_e29820_Supplementary_File_2.csv
- elife_poa_e29820_Transparent_Reporting_File.pdf
- elife_poa_e29820_Supplementary_File_1.csv
- elife_poa_e29820_Supplementary_File_3.csv
- elife_poa_e29820_Dataset_3.xls
- elife_poa_e29820_Dataset_1.xls
- elife_poa_e29820_Supplementary_File_6.csv
