# Supplementary material for: Epidemiological and ecological determinants of Zika virus transmission in an urban setting
Source: eLife journal article supplement (doi:10.7554/elife.29820), 2017-09-05
Supplement: supp [file elife-29820-supp-v1.zip › elife_poa_e29820_Dataset_1.xls]

## Sheet: CREATOR_FSA_newdata_temp_30y_FI
Day	year	month	date	Tmed	prec	hum
1	2013	1	2013-01-01	26	0	66
2	2013	1	2013-01-02	26.98	0	65.25
3	2013	1	2013-01-03	25.94	0	65
4	2013	1	2013-01-04	25.66	0	74
5	2013	1	2013-01-05	25.82	5	66.5
6	2013	1	2013-01-06	26.38	0	58.5
7	2013	1	2013-01-07	26.74	0	57
8	2013	1	2013-01-08	26.6	0	57.25
9	2013	1	2013-01-09	27.08	0	59
10	2013	1	2013-01-10	26.72	0	62.75
11	2013	1	2013-01-11	28.26	0	60.5
12	2013	1	2013-01-12	27.5	0	63.75
13	2013	1	2013-01-13	26.34	0	66.5
14	2013	1	2013-01-14	26.26	3.7	67.75
15	2013	1	2013-01-15	26.66	0	67.5
16	2013	1	2013-01-16	27.24	0	76.5
17	2013	1	2013-01-17	26.96	29	71.25
18	2013	1	2013-01-18	26.14	10.6	77.75
19	2013	1	2013-01-19	25.86	0	75.25
20	2013	1	2013-01-20	27.08	0.7	67.5
21	2013	1	2013-01-21	28.3	0	64
22	2013	1	2013-01-22	24.94	5.4	84.5
23	2013	1	2013-01-23	25.58	68.8	86
24	2013	1	2013-01-24	26.18	0	72.75
25	2013	1	2013-01-25	27.6	0	59
26	2013	1	2013-01-26	27.18	0	68.75
27	2013	1	2013-01-27	27.54	0	60.5
28	2013	1	2013-01-28	27.06	0	69.75
29	2013	1	2013-01-29	26.74	0	62
30	2013	1	2013-01-30	26.78	0	61
31	2013	1	2013-01-31	26.74	0	62
1	2013	2	2013-02-01	26.82	0	55.75
2	2013	2	2013-02-02	26.66	0	77
3	2013	2	2013-02-03	26.54	0	70.25
4	2013	2	2013-02-04	26.9	0	88.75
5	2013	2	2013-02-05	26.54	0	81.75
6	2013	2	2013-02-06	26.26	0.5	67.5
7	2013	2	2013-02-07	26.5	0	64.75
8	2013	2	2013-02-08	26.98	0	72.25
9	2013	2	2013-02-09	26.34	0	66.25
10	2013	2	2013-02-10	26.14	0	61
11	2013	2	2013-02-11	26.02	0	66.75
12	2013	2	2013-02-12	26.96	0	64.75
13	2013	2	2013-02-13	26.58	0	60
14	2013	2	2013-02-14	26.74	0	62.75
15	2013	2	2013-02-15	26.66	0	62
16	2013	2	2013-02-16	26.82	0	63.75
17	2013	2	2013-02-17	27.02	0	59.5
18	2013	2	2013-02-18	26.62	0	60.25
19	2013	2	2013-02-19	26.94	0	61.5
20	2013	2	2013-02-20	26.82	0	61.5
21	2013	2	2013-02-21	25.86	0	83.25
22	2013	2	2013-02-22	27.3	2	69
23	2013	2	2013-02-23	25.7	0	74.75
24	2013	2	2013-02-24	25.54	0	68.5
25	2013	2	2013-02-25	25.86	3	76
26	2013	2	2013-02-26	26.82	0.2	71
27	2013	2	2013-02-27	27.02	0	66
28	2013	2	2013-02-28	26.62	0	65
1	2013	3	2013-03-01	26.94	0	60
2	2013	3	2013-03-02	26.82	0	59
3	2013	3	2013-03-03	25.86	0	50
4	2013	3	2013-03-04	27.3	0	55
5	2013	3	2013-03-05	25.7	0	61
6	2013	3	2013-03-06	25.54	0	62
7	2013	3	2013-03-07	25.86	0	70
8	2013	3	2013-03-08	27	0	60.25
9	2013	3	2013-03-09	27.14	0	60.25
10	2013	3	2013-03-10	28.1	0	61.5
11	2013	3	2013-03-11	29.4	0	59
12	2013	3	2013-03-12	28.32	0	59.25
13	2013	3	2013-03-13	28.04	0	63.75
14	2013	3	2013-03-14	27.92	0	62.25
15	2013	3	2013-03-15	26.62	0	73.75
16	2013	3	2013-03-16	25.1	0.5	82
17	2013	3	2013-03-17	26.66	0.2	79.25
18	2013	3	2013-03-18	27.54	0	65.75
19	2013	3	2013-03-19	26.86	0	66.75
20	2013	3	2013-03-20	27.12	0	76
21	2013	3	2013-03-21	27.18	0	68.75
22	2013	3	2013-03-22	27.64	0	63.75
23	2013	3	2013-03-23	27.06	0	68.75
24	2013	3	2013-03-24	26.98	0	56.25
25	2013	3	2013-03-25	27.4	0	65.75
26	2013	3	2013-03-26	27.34	0	67.25
27	2013	3	2013-03-27	27.58	0	65.5
28	2013	3	2013-03-28	27.9	0	66.25
29	2013	3	2013-03-29	27.18	0	69.5
30	2013	3	2013-03-30	25.96	0	79.5
31	2013	3	2013-03-31	26.08	0.3	74
1	2013	4	2013-04-01	25.98	0	76.5
2	2013	4	2013-04-02	27.16	0	69.75
3	2013	4	2013-04-03	26.54	0	69.25
4	2013	4	2013-04-04	27.34	0	73.5
5	2013	4	2013-04-05	27.7	0	66.25
6	2013	4	2013-04-06	27.66	0	66.75
7	2013	4	2013-04-07	27.54	0	66.75
8	2013	4	2013-04-08	28.3	0	61
9	2013	4	2013-04-09	27.9	0	64.5
10	2013	4	2013-04-10	27.46	0	63.75
11	2013	4	2013-04-11	27.18	0	65.75
12	2013	4	2013-04-12	27.18	0	67.25
13	2013	4	2013-04-13	27.74	0	59.25
14	2013	4	2013-04-14	28.38	0	65.5
15	2013	4	2013-04-15	27.68	0	75.5
16	2013	4	2013-04-16	27.36	0	73.5
17	2013	4	2013-04-17	27.18	0	72.75
18	2013	4	2013-04-18	25.08	0.9	80.5
19	2013	4	2013-04-19	25.06	0.2	88
20	2013	4	2013-04-20	23.02	8.8	93.25
21	2013	4	2013-04-21	22.54	20.2	91.25
22	2013	4	2013-04-22	23.76	10.1	83.25
23	2013	4	2013-04-23	22.78	4.9	87.5
24	2013	4	2013-04-24	22.54	14.2	91
25	2013	4	2013-04-25	22.58	14	89.75
26	2013	4	2013-04-26	22.82	5	89.75
27	2013	4	2013-04-27	23.22	0	91.75
28	2013	4	2013-04-28	22.8	1.6	91
29	2013	4	2013-04-29	22.82	6.7	93.25
30	2013	4	2013-04-30	23.22	4.5	95.5
1	2013	5	2013-05-01	23.94	2.7	90.5
2	2013	5	2013-05-02	24.3	0.6	91.75
3	2013	5	2013-05-03	23.42	0	99.25
4	2013	5	2013-05-04	23.76	0.2	85.5
5	2013	5	2013-05-05	24.34	3.5	85
6	2013	5	2013-05-06	24.58	0	80.25
7	2013	5	2013-05-07	25.42	0	79.75
8	2013	5	2013-05-08	25.3	0	81.5
9	2013	5	2013-05-09	25.54	0	85.25
10	2013	5	2013-05-10	24.22	0.4	86.25
11	2013	5	2013-05-11	22.7	2.1	91.5
12	2013	5	2013-05-12	23.58	6.4	96
13	2013	5	2013-05-13	24.06	0.7	84
14	2013	5	2013-05-14	24.18	5	83.5
15	2013	5	2013-05-15	23.62	0.2	87.5
16	2013	5	2013-05-16	23.96	6.3	89.5
17	2013	5	2013-05-17	24.02	0	84
18	2013	5	2013-05-18	23.98	2.2	82.75
19	2013	5	2013-05-19	21.9	2.7	86
20	2013	5	2013-05-20	21.34	3.3	85.75
21	2013	5	2013-05-21	22.46	1.8	81.5
22	2013	5	2013-05-22	24.16	0	74.25
23	2013	5	2013-05-23	24.66	0	84.25
24	2013	5	2013-05-24	24.3	0	82
25	2013	5	2013-05-25	25.18	0	76.75
26	2013	5	2013-05-26	24.3	0	87.75
27	2013	5	2013-05-27	23.1	1.2	89
28	2013	5	2013-05-28	24.46	0.2	81
29	2013	5	2013-05-29	24.54	0	82.5
30	2013	5	2013-05-30	24.9	0	72
31	2013	5	2013-05-31	24.62	0	77.75
1	2013	6	2013-06-01	24.02	1.2	90.75
2	2013	6	2013-06-02	23.42	6.6	84.25
3	2013	6	2013-06-03	24.82	0	77.75
4	2013	6	2013-06-04	24.74	0	81
5	2013	6	2013-06-05	22.94	33	91.5
6	2013	6	2013-06-06	22.46	2.9	91.5
7	2013	6	2013-06-07	23.34	19.7	84.25
8	2013	6	2013-06-08	22.98	3	95
9	2013	6	2013-06-09	23.5	0.5	85.5
10	2013	6	2013-06-10	23.58	3.4	84
11	2013	6	2013-06-11	22.38	2.6	87.75
12	2013	6	2013-06-12	23.14	3.9	86.75
13	2013	6	2013-06-13	23.1	1.9	84.75
14	2013	6	2013-06-14	23.64	0.4	85.5
15	2013	6	2013-06-15	23.18	0	85
16	2013	6	2013-06-16	21.98	4.6	89
17	2013	6	2013-06-17	22.54	2	86.75
18	2013	6	2013-06-18	23.78	0.4	84
19	2013	6	2013-06-19	24.1	6	83.75
20	2013	6	2013-06-20	23.26	1	84.5
21	2013	6	2013-06-21	23.14	4.5	87.25
22	2013	6	2013-06-22	22.74	5.1	90
23	2013	6	2013-06-23	22.42	0	88.25
24	2013	6	2013-06-24	22.26	0	86.75
25	2013	6	2013-06-25	22.24	0	89.25
26	2013	6	2013-06-26	21	0	81
27	2013	6	2013-06-27	21.74	0	86
28	2013	6	2013-06-28	22.66	7.2	86.5
29	2013	6	2013-06-29	22.5	2.4	91.75
30	2013	6	2013-06-30	22.66	0	93
1	2013	7	2013-07-01	22.34	0	87.5
2	2013	7	2013-07-02	22.02	0	85.25
3	2013	7	2013-07-03	21.9	0	85.25
4	2013	7	2013-07-04	22.42	4.7	94
5	2013	7	2013-07-05	22.18	1.1	91.75
6	2013	7	2013-07-06	21.52	4.7	92.5
7	2013	7	2013-07-07	21.86	1.7	89
8	2013	7	2013-07-08	22.98	0	83.75
9	2013	7	2013-07-09	21.64	0	84
10	2013	7	2013-07-10	22.22	0.6	86.25
11	2013	7	2013-07-11	21.42	4	87.75
12	2013	7	2013-07-12	22.36	4.8	84.5
13	2013	7	2013-07-13	22.02	5.2	91.5
14	2013	7	2013-07-14	22.54	0.6	88.5
15	2013	7	2013-07-15	22.74	0	88.5
16	2013	7	2013-07-16	22.66	0	82
17	2013	7	2013-07-17	22.6	0	88.25
18	2013	7	2013-07-18	22.38	0	84.75
19	2013	7	2013-07-19	22.7	0	90.75
20	2013	7	2013-07-20	22.62	1.5	93
21	2013	7	2013-07-21	22.94	0	82.25
22	2013	7	2013-07-22	22.58	0	82
23	2013	7	2013-07-23	21.46	3.5	88.25
24	2013	7	2013-07-24	23.22	1.6	81.5
25	2013	7	2013-07-25	21.5	0	88.25
26	2013	7	2013-07-26	21.54	4.3	85
27	2013	7	2013-07-27	21.1	19.4	89.25
28	2013	7	2013-07-28	21.92	11.4	90.5
29	2013	7	2013-07-29	21.66	0.5	85.75
30	2013	7	2013-07-30	21.54	2	82.75
31	2013	7	2013-07-31	21.54	2.6	83.25
1	2013	8	2013-08-01	21.66	0	81
2	2013	8	2013-08-02	22.3	0	80
3	2013	8	2013-08-03	22.02	2.7	78.75
4	2013	8	2013-08-04	21.3	0	77.5
5	2013	8	2013-08-05	21.9	0	81.25
6	2013	8	2013-08-06	22.26	0.5	90.75
7	2013	8	2013-08-07	21.22	7.3	82
8	2013	8	2013-08-08	21.9	0.4	81.5
9	2013	8	2013-08-09	22.3	0.8	83.5
10	2013	8	2013-08-10	21.92	2.4	82.5
11	2013	8	2013-08-11	22	0	82
12	2013	8	2013-08-12	23.16	0	79.25
13	2013	8	2013-08-13	21.74	3.2	87.5
14	2013	8	2013-08-14	22.38	2.3	87
15	2013	8	2013-08-15	23	0	80.5
16	2013	8	2013-08-16	23.18	0	85.75
17	2013	8	2013-08-17	21.74	0.9	86.5
18	2013	8	2013-08-18	21.5	1	86.25
19	2013	8	2013-08-19	21.62	0.5	75.25
20	2013	8	2013-08-20	21.14	0.6	87
21	2013	8	2013-08-21	21.54	1.1	79.25
22	2013	8	2013-08-22	21.66	0.4	83.5
23	2013	8	2013-08-23	21.54	2.3	90.75
24	2013	8	2013-08-24	22.38	0.6	87
25	2013	8	2013-08-25	22.14	1.6	86.75
26	2013	8	2013-08-26	22.3	0	78.25
27	2013	8	2013-08-27	22	0	86
28	2013	8	2013-08-28	22.54	0	78
29	2013	8	2013-08-29	23.38	0	78.5
30	2013	8	2013-08-30	22.18	0.4	92
31	2013	8	2013-08-31	21.46	25	94.75
1	2013	9	2013-09-01	22.14	2.2	88
2	2013	9	2013-09-02	22.34	0	80.75
3	2013	9	2013-09-03	22.94	0	82.5
4	2013	9	2013-09-04	23.06	0	86.75
5	2013	9	2013-09-05	23.12	0	86
6	2013	9	2013-09-06	21.58	3.9	89.5
7	2013	9	2013-09-07	22.22	1.8	85.25
8	2013	9	2013-09-08	22	2.8	81.75
9	2013	9	2013-09-09	20.66	4.1	84.75
10	2013	9	2013-09-10	21.78	5.5	79.75
11	2013	9	2013-09-11	21.46	1.2	80
12	2013	9	2013-09-12	22.02	3.9	85.75
13	2013	9	2013-09-13	22.46	1.7	82.5
14	2013	9	2013-09-14	23.42	1	79.5
15	2013	9	2013-09-15	22.94	3.1	74.75
16	2013	9	2013-09-16	23.9	0	83.5
17	2013	9	2013-09-17	24.02	0	76.75
18	2013	9	2013-09-18	24.24	0	83
19	2013	9	2013-09-19	24.36	0.4	79.5
20	2013	9	2013-09-20	23.5	0	85.75
21	2013	9	2013-09-21	23.54	0	83.25
22	2013	9	2013-09-22	23.78	0	85.5
23	2013	9	2013-09-23	24.42	0	78.25
24	2013	9	2013-09-24	23.54	0	81.75
25	2013	9	2013-09-25	23.66	0	87.25
26	2013	9	2013-09-26	24.38	0	86
27	2013	9	2013-09-27	24.1	0	86.25
28	2013	9	2013-09-28	23.98	0	80.5
29	2013	9	2013-09-29	23.9	3	79.25
30	2013	9	2013-09-30	23.3	0	72.75
1	2013	10	2013-10-01	23.66	0	73.75
2	2013	10	2013-10-02	25.98	0	70
3	2013	10	2013-10-03	24.82	0	75
4	2013	10	2013-10-04	25.38	0	69.5
5	2013	10	2013-10-05	25.42	0	78.75
6	2013	10	2013-10-06	26.02	0	78.75
7	2013	10	2013-10-07	25.1	0	74.25
8	2013	10	2013-10-08	24.42	0	79.25
9	2013	10	2013-10-09	22.02	1.5	90.5
10	2013	10	2013-10-10	20.54	37	93
11	2013	10	2013-10-11	21.74	18.4	88.75
12	2013	10	2013-10-12	23.26	0.3	69.25
13	2013	10	2013-10-13	22.42	0	70.75
14	2013	10	2013-10-14	23.46	0.4	84.5
15	2013	10	2013-10-15	23.7	2.1	87.25
16	2013	10	2013-10-16	23.58	0	89
17	2013	10	2013-10-17	23.4	6.1	84.5
18	2013	10	2013-10-18	24.18	0	84.75
19	2013	10	2013-10-19	24.1	0	75.5
20	2013	10	2013-10-20	24.18	0	72.5
21	2013	10	2013-10-21	24.34	0	80.75
22	2013	10	2013-10-22	25.22	0	81
23	2013	10	2013-10-23	23.42	0	81
24	2013	10	2013-10-24	24.5	0	68
25	2013	10	2013-10-25	23.94	0	73
26	2013	10	2013-10-26	23.14	0	62.25
27	2013	10	2013-10-27	24.42	0	62.75
28	2013	10	2013-10-28	24.34	0	59.5
29	2013	10	2013-10-29	25.92	0	71.75
30	2013	10	2013-10-30	25.5	1.2	85
31	2013	10	2013-10-31	26.1	5	79.75
1	2013	11	2013-11-01	25.78	0	72.25
2	2013	11	2013-11-02	25.14	0	89.25
3	2013	11	2013-11-03	22.74	5.2	91.5
4	2013	11	2013-11-04	23.58	0	84.25
5	2013	11	2013-11-05	24.02	12.4	78.25
6	2013	11	2013-11-06	25.1	0	71.25
7	2013	11	2013-11-07	25.1	0	67.75
8	2013	11	2013-11-08	24.98	0	76.25
9	2013	11	2013-11-09	25.84	0	66.75
10	2013	11	2013-11-10	26.36	0	62.5
11	2013	11	2013-11-11	25.98	0	73.75
12	2013	11	2013-11-12	26.58	0	70.75
13	2013	11	2013-11-13	26.14	0	75
14	2013	11	2013-11-14	25.1	0	75
15	2013	11	2013-11-15	24.06	0	76.25
16	2013	11	2013-11-16	25.2	3.5	71.25
17	2013	11	2013-11-17	25.7	0	62.25
18	2013	11	2013-11-18	25.94	0	66.25
19	2013	11	2013-11-19	25.48	0	78.75
20	2013	11	2013-11-20	24.06	17	67.25
21	2013	11	2013-11-21	23.62	0.2	74.5
22	2013	11	2013-11-22	24.2	0	69.25
23	2013	11	2013-11-23	25	0	63.75
24	2013	11	2013-11-24	27.4	0	59.5
25	2013	11	2013-11-25	26.72	0	77.75
26	2013	11	2013-11-26	26.26	0	82.75
27	2013	11	2013-11-27	26.38	0.1	85.5
28	2013	11	2013-11-28	24.66	0.1	90
29	2013	11	2013-11-29	25.26	16.9	81.75
30	2013	11	2013-11-30	25.62	0.3	78
1	2013	12	2013-12-01	26.1	0	84.25
2	2013	12	2013-12-02	25.18	0	65
3	2013	12	2013-12-03	26.06	0	79.25
4	2013	12	2013-12-04	27.66	0	78.75
5	2013	12	2013-12-05	27.5	0	78.25
6	2013	12	2013-12-06	26.5	0	72.25
7	2013	12	2013-12-07	26.3	0	79.75
8	2013	12	2013-12-08	26.78	0	76.25
9	2013	12	2013-12-09	26.14	0	67.5
10	2013	12	2013-12-10	26.02	0	65.25
11	2013	12	2013-12-11	25.34	0	77
12	2013	12	2013-12-12	27.24	0	69.25
13	2013	12	2013-12-13	25.98	0	82
14	2013	12	2013-12-14	27.24	2.6	64.25
15	2013	12	2013-12-15	27.14	0	61.25
16	2013	12	2013-12-16	27.16	0	59.25
17	2013	12	2013-12-17	24.94	0	76.25
18	2013	12	2013-12-18	25.06	28	85
19	2013	12	2013-12-19	25.18	3.4	86.5
20	2013	12	2013-12-20	24.82	3	84
21	2013	12	2013-12-21	24.5	23.6	84
22	2013	12	2013-12-22	24.98	5.2	84.75
23	2013	12	2013-12-23	26.02	0.4	74
24	2013	12	2013-12-24	25.62	0	68.25
25	2013	12	2013-12-25	26.5	0	66.75
26	2013	12	2013-12-26	26.78	0	64.75
27	2013	12	2013-12-27	26.3	0	62.75
28	2013	12	2013-12-28	26.06	0	65.25
29	2013	12	2013-12-29	25.94	0	63.25
30	2013	12	2013-12-30	25.98	0	67.5
31	2013	12	2013-12-31	26.74	0	62.25
1	2014	1	2014-01-01	26.18	0	62.25
2	2014	1	2014-01-02	25.5	0	66
3	2014	1	2014-01-03	26.3	0	69.25
4	2014	1	2014-01-04	25.98	0	62.25
5	2014	1	2014-01-05	25.94	0	71.5
6	2014	1	2014-01-06	26.42	0	78
7	2014	1	2014-01-07	25.66	0	71.5
8	2014	1	2014-01-08	25.7	0.2	71.25
9	2014	1	2014-01-09	26.1	0	74.75
10	2014	1	2014-01-10	26.34	0	73
11	2014	1	2014-01-11	26.9	0	80.5
12	2014	1	2014-01-12	26.98	2.3	74
13	2014	1	2014-01-13	26.22	0	74.75
14	2014	1	2014-01-14	26.18	0.6	76.75
15	2014	1	2014-01-15	25.98	0	68.5
16	2014	1	2014-01-16	25.58	0	70.75
17	2014	1	2014-01-17	26.54	0	74.75
18	2014	1	2014-01-18	26.98	0	63
19	2014	1	2014-01-19	26.9	0	62.5
20	2014	1	2014-01-20	27.68	0	68.25
21	2014	1	2014-01-21	26.34	0	75.25
22	2014	1	2014-01-22	26.38	8.4	67
23	2014	1	2014-01-23	26.12	0	65.5
24	2014	1	2014-01-24	26.24	0	72
25	2014	1	2014-01-25	25.5	0	53
26	2014	1	2014-01-26	26.62	0	60.25
27	2014	1	2014-01-27	25.66	0	67.5
28	2014	1	2014-01-28	25.1	7.9	68.75
29	2014	1	2014-01-29	26.18	0	78.25
30	2014	1	2014-01-30	26.02	0	74.25
31	2014	1	2014-01-31	25.12	0	77.75
1	2014	2	2014-02-01	25.78	0.3	78.75
2	2014	2	2014-02-02	25.22	0	74.25
3	2014	2	2014-02-03	25.5	0	68.25
4	2014	2	2014-02-04	24.74	2.6	89.75
5	2014	2	2014-02-05	24.82	6.1	83.75
6	2014	2	2014-02-06	25.34	1.3	85
7	2014	2	2014-02-07	24.38	0	86.25
8	2014	2	2014-02-08	22.86	3.8	86.5
9	2014	2	2014-02-09	24.7	3.6	77.75
10	2014	2	2014-02-10	25.5	0	77.25
11	2014	2	2014-02-11	25.3	0	69.5
12	2014	2	2014-02-12	26	0	78
13	2014	2	2014-02-13	27.92	0	70.75
14	2014	2	2014-02-14	28.14	0	77.5
15	2014	2	2014-02-15	28.1	0	92.5
16	2014	2	2014-02-16	28.62	0	86.5
17	2014	2	2014-02-17	25.86	0	62.75
18	2014	2	2014-02-18	26.46	0	59
19	2014	2	2014-02-19	26.52	0	61.5
20	2014	2	2014-02-20	24.74	4.8	64.75
21	2014	2	2014-02-21	25.82	2.8	62.75
22	2014	2	2014-02-22	25.54	0	61.25
23	2014	2	2014-02-23	25.06	3	62.5
24	2014	2	2014-02-24	25.42	9.2	91
25	2014	2	2014-02-25	25.26	1	86
26	2014	2	2014-02-26	25.26	0	88.5
27	2014	2	2014-02-27	25.3	3.1	80.25
28	2014	2	2014-02-28	25.98	0	83.75
1	2014	3	2014-03-01	24.82	0	87.25
2	2014	3	2014-03-02	25.58	9	82.25
3	2014	3	2014-03-03	24.66	0	62.5
4	2014	3	2014-03-04	24.58	1.2	67
5	2014	3	2014-03-05	24.98	8	62.5
6	2014	3	2014-03-06	25.24	0	75
7	2014	3	2014-03-07	25.54	0	76.75
8	2014	3	2014-03-08	25.54	0	84.75
9	2014	3	2014-03-09	26.14	0	84
10	2014	3	2014-03-10	26	0	75
11	2014	3	2014-03-11	26.22	1	67.75
12	2014	3	2014-03-12	25.9	0	78
13	2014	3	2014-03-13	26.02	0	69.75
14	2014	3	2014-03-14	24.82	0	77.75
15	2014	3	2014-03-15	24.7	2.8	81.75
16	2014	3	2014-03-16	25.26	0.5	85.75
17	2014	3	2014-03-17	25.74	1.6	76.75
18	2014	3	2014-03-18	25.38	0	76.75
19	2014	3	2014-03-19	25.34	0	78.75
20	2014	3	2014-03-20	26.32	0	71.5
21	2014	3	2014-03-21	26.46	0	73
22	2014	3	2014-03-22	27.02	0	84
23	2014	3	2014-03-23	26.94	0	77.75
24	2014	3	2014-03-24	27.46	0	69.25
25	2014	3	2014-03-25	27.1	0	77.75
26	2014	3	2014-03-26	27.18	0	72.75
27	2014	3	2014-03-27	27.14	0	72.75
28	2014	3	2014-03-28	28	0	68.25
29	2014	3	2014-03-29	27.94	0	67
30	2014	3	2014-03-30	26.74	0	71.75
31	2014	3	2014-03-31	25.62	0	70
1	2014	4	2014-04-01	26.46	0	73.25
2	2014	4	2014-04-02	25.66	0	68
3	2014	4	2014-04-03	27.08	0	60.75
4	2014	4	2014-04-04	26.92	0	60.5
5	2014	4	2014-04-05	26.94	6	62.25
6	2014	4	2014-04-06	27.12	0	63.25
7	2014	4	2014-04-07	26.9	0	71.5
8	2014	4	2014-04-08	27	0	77.75
9	2014	4	2014-04-09	27.04	1.4	77.25
10	2014	4	2014-04-10	26.9	0.1	80.25
11	2014	4	2014-04-11	26.58	0	74.5
12	2014	4	2014-04-12	26.12	0	56.75
13	2014	4	2014-04-13	26.7	0	67.25
14	2014	4	2014-04-14	27.16	1	59.25
15	2014	4	2014-04-15	26.06	0	71
16	2014	4	2014-04-16	24.58	0	73
17	2014	4	2014-04-17	25.82	0	61.75
18	2014	4	2014-04-18	26.26	0	80.5
19	2014	4	2014-04-19	26.98	0	78.5
20	2014	4	2014-04-20	28.08	0.5	79.75
21	2014	4	2014-04-21	26.14	0	64
22	2014	4	2014-04-22	25.9	0	66.75
23	2014	4	2014-04-23	27.04	0	66.25
24	2014	4	2014-04-24	28.44	0	70
25	2014	4	2014-04-25	28.56	0	70.25
26	2014	4	2014-04-26	26.94	0	75.5
27	2014	4	2014-04-27	25.18	1	85.5
28	2014	4	2014-04-28	25.06	1.2	68.75
29	2014	4	2014-04-29	21.88	7.2	84.25
30	2014	4	2014-04-30	23.84	1.2	77.75
1	2014	5	2014-05-01	23.9	0	85
2	2014	5	2014-05-02	25.06	0	82.25
3	2014	5	2014-05-03	24.82	0	69.25
4	2014	5	2014-05-04	24.34	2.5	58.25
5	2014	5	2014-05-05	24.54	0	78.5
6	2014	5	2014-05-06	24.5	0	85
7	2014	5	2014-05-07	24.74	8.8	87.5
8	2014	5	2014-05-08	24.58	0.7	83
9	2014	5	2014-05-09	25.02	0	78
10	2014	5	2014-05-10	25.66	0	70
11	2014	5	2014-05-11	23.42	0	88.5
12	2014	5	2014-05-12	21.66	11.2	83
13	2014	5	2014-05-13	21.82	0.4	84
14	2014	5	2014-05-14	23.46	0	77.75
15	2014	5	2014-05-15	24.02	3	89.25
16	2014	5	2014-05-16	23.02	40.5	89.75
17	2014	5	2014-05-17	24.66	9.1	84
18	2014	5	2014-05-18	23.66	0.4	86.75
19	2014	5	2014-05-19	23.5	5.8	92.75
20	2014	5	2014-05-20	24.04	1.2	79
21	2014	5	2014-05-21	24	0	88.75
22	2014	5	2014-05-22	24.54	8.8	75.5
23	2014	5	2014-05-23	24.82	1.6	83.75
24	2014	5	2014-05-24	27.04	0	70.25
25	2014	5	2014-05-25	25.7	0	63.75
26	2014	5	2014-05-26	24.62	0	89.75
27	2014	5	2014-05-27	23.96	0	83
28	2014	5	2014-05-28	24	0	89
29	2014	5	2014-05-29	24.5	0	82.5
30	2014	5	2014-05-30	23.34	1.2	83.75
31	2014	5	2014-05-31	23	3.7	85
1	2014	6	2014-06-01	22.7	2.1	79.25
2	2014	6	2014-06-02	23.44	0	81.25
3	2014	6	2014-06-03	23.58	0	84.75
4	2014	6	2014-06-04	23.32	0	80.5
5	2014	6	2014-06-05	23.02	0	83.25
6	2014	6	2014-06-06	23.66	0	81.5
7	2014	6	2014-06-07	22.14	0	67
8	2014	6	2014-06-08	22.62	0	84.5
9	2014	6	2014-06-09	21.94	4.6	84.5
10	2014	6	2014-06-10	23.7	6.1	78
11	2014	6	2014-06-11	23.34	2	78
12	2014	6	2014-06-12	23.52	3.4	75.75
13	2014	6	2014-06-13	23.9	6.4	76
14	2014	6	2014-06-14	23.22	5.4	70.5
15	2014	6	2014-06-15	23.42	1	69.75
16	2014	6	2014-06-16	23.82	0	76.5
17	2014	6	2014-06-17	21.22	3.1	88.25
18	2014	6	2014-06-18	22.9	7.2	81.5
19	2014	6	2014-06-19	22.5	0	84
20	2014	6	2014-06-20	21.3	0.8	86.25
21	2014	6	2014-06-21	22.66	1	79
22	2014	6	2014-06-22	22.34	1.6	94.5
23	2014	6	2014-06-23	21.24	11.4	90.75
24	2014	6	2014-06-24	21.68	6	89.75
25	2014	6	2014-06-25	21.22	0	86.25
26	2014	6	2014-06-26	22.14	0	81.5
27	2014	6	2014-06-27	22.58	0	83.5
28	2014	6	2014-06-28	23.26	2.8	69.75
29	2014	6	2014-06-29	22.78	4.9	77.75
30	2014	6	2014-06-30	22.78	0	87.75
1	2014	7	2014-07-01	23.3	0	74.25
2	2014	7	2014-07-02	23.34	0	72
3	2014	7	2014-07-03	21.86	0	68.5
4	2014	7	2014-07-04	23.48	0	73.5
5	2014	7	2014-07-05	21.46	1.2	80.25
6	2014	7	2014-07-06	21.88	2.9	89.75
7	2014	7	2014-07-07	21.6	7.3	94.5
8	2014	7	2014-07-08	21.26	3.4	89.5
9	2014	7	2014-07-09	22.06	4.2	86
10	2014	7	2014-07-10	22.08	0	78.5
11	2014	7	2014-07-11	22.26	0	79.5
12	2014	7	2014-07-12	22.06	0	79.75
13	2014	7	2014-07-13	21.86	0	88.75
14	2014	7	2014-07-14	20.98	8.9	92.25
15	2014	7	2014-07-15	21.5	5.9	89
16	2014	7	2014-07-16	22.36	6.4	84.75
17	2014	7	2014-07-17	21.58	0.7	89
18	2014	7	2014-07-18	22.18	1.3	82.75
19	2014	7	2014-07-19	22.9	0	77.25
20	2014	7	2014-07-20	22.22	0	79
21	2014	7	2014-07-21	21.52	1	88
22	2014	7	2014-07-22	20.74	29	94.25
23	2014	7	2014-07-23	21.38	20.2	88.25
24	2014	7	2014-07-24	22.1	6.6	89.25
25	2014	7	2014-07-25	22.62	1	91.75
26	2014	7	2014-07-26	22	0.3	90
27	2014	7	2014-07-27	22.06	0	92.25
28	2014	7	2014-07-28	21.9	2.4	85
29	2014	7	2014-07-29	21.38	0.2	84.25
30	2014	7	2014-07-30	22.02	3.4	87.75
31	2014	7	2014-07-31	20.86	16	90.5
1	2014	8	2014-08-01	20.66	7.4	97
2	2014	8	2014-08-02	22.06	6.5	79
3	2014	8	2014-08-03	21.94	0	71.25
4	2014	8	2014-08-04	22.44	0	80
5	2014	8	2014-08-05	21	0	92
6	2014	8	2014-08-06	21.46	0	91.75
7	2014	8	2014-08-07	22	9.4	95
8	2014	8	2014-08-08	20.26	2.4	97.5
9	2014	8	2014-08-09	19.84	0	91.5
10	2014	8	2014-08-10	21.04	0.4	92.25
11	2014	8	2014-08-11	21.54	0	84.5
12	2014	8	2014-08-12	21.86	0	90.25
13	2014	8	2014-08-13	21.74	0	86
14	2014	8	2014-08-14	21.86	0	86.5
15	2014	8	2014-08-15	21.74	9.8	89
16	2014	8	2014-08-16	21.18	3.2	87.75
17	2014	8	2014-08-17	20.86	4.1	88.75
18	2014	8	2014-08-18	21.3	3.8	75.75
19	2014	8	2014-08-19	20.2	0.8	86
20	2014	8	2014-08-20	21.1	0	85
21	2014	8	2014-08-21	21.06	1.4	85
22	2014	8	2014-08-22	21.1	0	85
23	2014	8	2014-08-23	21.5	0	64.25
24	2014	8	2014-08-24	21.42	0.3	67.25
25	2014	8	2014-08-25	21.46	0	82.75
26	2014	8	2014-08-26	22.04	0	85
27	2014	8	2014-08-27	21.42	0	83.25
28	2014	8	2014-08-28	22.5	0	85
29	2014	8	2014-08-29	22.9	0	86.25
30	2014	8	2014-08-30	21.84	0	89.5
31	2014	8	2014-08-31	22.98	0	82
1	2014	9	2014-09-01	22.38	0	74.75
2	2014	9	2014-09-02	23.66	0	77.25
3	2014	9	2014-09-03	24.1	0	81
4	2014	9	2014-09-04	24.62	0	79.25
5	2014	9	2014-09-05	22.26	1.4	95
6	2014	9	2014-09-06	20.74	4.9	82.75
7	2014	9	2014-09-07	20.78	3	86.75
8	2014	9	2014-09-08	22	3	81
9	2014	9	2014-09-09	21.24	0	80
10	2014	9	2014-09-10	21.3	3.2	91.75
11	2014	9	2014-09-11	21.74	2	88.25
12	2014	9	2014-09-12	21.58	0	85.5
13	2014	9	2014-09-13	23.06	0	75.25
14	2014	9	2014-09-14	23.38	0	77.75
15	2014	9	2014-09-15	22.68	0	78
16	2014	9	2014-09-16	22.18	0	77.5
17	2014	9	2014-09-17	22.54	0	74.5
18	2014	9	2014-09-18	22.38	0.8	80.75
19	2014	9	2014-09-19	23.12	0	76.25
20	2014	9	2014-09-20	24.64	0	80
21	2014	9	2014-09-21	25.1	0	80
22	2014	9	2014-09-22	25.7	0	76.75
23	2014	9	2014-09-23	23.18	0.4	87.25
24	2014	9	2014-09-24	23.02	2.4	85.25
25	2014	9	2014-09-25	22.58	0.6	89
26	2014	9	2014-09-26	23.54	0	85
27	2014	9	2014-09-27	23.56	0.4	76.25
28	2014	9	2014-09-28	24.08	0	73.25
29	2014	9	2014-09-29	24.54	0	75.25
30	2014	9	2014-09-30	25.26	0	66.5
1	2014	10	2014-10-01	24.44	0	73.5
2	2014	10	2014-10-02	24.9	0	75.25
3	2014	10	2014-10-03	22.7	0.6	93.75
4	2014	10	2014-10-04	20.82	27.6	96.5
5	2014	10	2014-10-05	21.34	10.4	92
6	2014	10	2014-10-06	20.86	2.6	81.75
7	2014	10	2014-10-07	21.3	0	79.5
8	2014	10	2014-10-08	22.9	0	80
9	2014	10	2014-10-09	23.1	0	82.25
10	2014	10	2014-10-10	23.66	0	75
11	2014	10	2014-10-11	23.14	0	86
12	2014	10	2014-10-12	23.06	1	91.75
13	2014	10	2014-10-13	23.86	5	87.75
14	2014	10	2014-10-14	24.1	0	74.75
15	2014	10	2014-10-15	24.18	0	72.5
16	2014	10	2014-10-16	23.7	0	76.25
17	2014	10	2014-10-17	25.06	0	75.25
18	2014	10	2014-10-18	24.74	0	70
19	2014	10	2014-10-19	24.78	0	71.25
20	2014	10	2014-10-20	25.34	0	72.75
21	2014	10	2014-10-21	25.02	0	72
22	2014	10	2014-10-22	22.62	5.4	82.25
23	2014	10	2014-10-23	23.72	0	74.25
24	2014	10	2014-10-24	23.24	0.6	77
25	2014	10	2014-10-25	23.34	0	79
26	2014	10	2014-10-26	23.72	0	76.75
27	2014	10	2014-10-27	24.96	0	73
28	2014	10	2014-10-28	26.36	0	67
29	2014	10	2014-10-29	26.6	0	69.5
30	2014	10	2014-10-30	25.52	0	74
31	2014	10	2014-10-31	24.5	0	78
1	2014	11	2014-11-01	24.5	0	89
2	2014	11	2014-11-02	24.44	0.2	89
3	2014	11	2014-11-03	23.86	2	76.5
4	2014	11	2014-11-04	24.24	0	81
5	2014	11	2014-11-05	25.5	1.8	83.5
6	2014	11	2014-11-06	25.44	0	76.5
7	2014	11	2014-11-07	23.82	0	83.25
8	2014	11	2014-11-08	25	0	72.5
9	2014	11	2014-11-09	26.66	0	65.25
10	2014	11	2014-11-10	26.94	0	69.75
11	2014	11	2014-11-11	27.14	0	75.5
12	2014	11	2014-11-12	27.34	0	65.75
13	2014	11	2014-11-13	27.22	0	70
14	2014	11	2014-11-14	26	0	69
15	2014	11	2014-11-15	27.52	0	68.5
16	2014	11	2014-11-16	24.3	0.1	89.25
17	2014	11	2014-11-17	22.14	1	90.5
18	2014	11	2014-11-18	21.18	2.1	91
19	2014	11	2014-11-19	22.46	0.3	90
20	2014	11	2014-11-20	22.62	1.1	93.75
21	2014	11	2014-11-21	24.02	2	77.75
22	2014	11	2014-11-22	25.22	15	87.75
23	2014	11	2014-11-23	25.22	2	74.5
24	2014	11	2014-11-24	25.5	0	72.75
25	2014	11	2014-11-25	25.94	0	74.25
26	2014	11	2014-11-26	25.38	0	72.75
27	2014	11	2014-11-27	25.22	0	74
28	2014	11	2014-11-28	26.58	0	71.25
29	2014	11	2014-11-29	26.04	0	73.5
30	2014	11	2014-11-30	24.54	0	77.5
1	2014	12	2014-12-01	23	0	77
2	2014	12	2014-12-02	24	0	86
3	2014	12	2014-12-03	24.46	0	81.75
4	2014	12	2014-12-04	25.14	0	75.75
5	2014	12	2014-12-05	25.66	0	85.25
6	2014	12	2014-12-06	25.84	0	91.25
7	2014	12	2014-12-07	25.06	0.4	89
8	2014	12	2014-12-08	25.66	5.4	81.75
9	2014	12	2014-12-09	24.66	0	87.5
10	2014	12	2014-12-10	25.46	0	84.5
11	2014	12	2014-12-11	25.46	2.6	93.5
12	2014	12	2014-12-12	24.82	36.8	90
13	2014	12	2014-12-13	25.46	0	84.75
14	2014	12	2014-12-14	25.78	12.2	79.25
15	2014	12	2014-12-15	24.98	0	93.75
16	2014	12	2014-12-16	25.7	0	83.5
17	2014	12	2014-12-17	25.22	40.7	87.75
18	2014	12	2014-12-18	24.28	0	88
19	2014	12	2014-12-19	25.62	0	86.75
20	2014	12	2014-12-20	26.44	0	75
21	2014	12	2014-12-21	26.26	0	75
22	2014	12	2014-12-22	26	0	83
23	2014	12	2014-12-23	26.26	5.4	77.75
24	2014	12	2014-12-24	25.72	0	78.5
25	2014	12	2014-12-25	25.8	1.5	78
26	2014	12	2014-12-26	23.94	4.2	87.25
27	2014	12	2014-12-27	25.04	0	89.5
28	2014	12	2014-12-28	24.9	0	76.75
29	2014	12	2014-12-29	25.86	0	66.75
30	2014	12	2014-12-30	26.28	0	71
31	2014	12	2014-12-31	26.3	0	74.25
1	2015	1	2015-01-01	27.54	0	65.75
2	2015	1	2015-01-02	26.06	0	74.5
3	2015	1	2015-01-03	25.54	0	70.5
4	2015	1	2015-01-04	24.3	0	74.25
5	2015	1	2015-01-05	26.26	0	75.25
6	2015	1	2015-01-06	26.5	0	79.5
7	2015	1	2015-01-07	25.38	0	82.25
8	2015	1	2015-01-08	24.26	0	95.25
9	2015	1	2015-01-09	24.5	10.2	86.25
10	2015	1	2015-01-10	25.1	2.8	83
11	2015	1	2015-01-11	25.98	0	74.75
12	2015	1	2015-01-12	26.1	0	74
13	2015	1	2015-01-13	25.7	0	77.25
14	2015	1	2015-01-14	26.12	0	71.25
15	2015	1	2015-01-15	25.9	0	75.25
16	2015	1	2015-01-16	25.66	0	78
17	2015	1	2015-01-17	26.48	0	78.5
18	2015	1	2015-01-18	26.6	0	75.75
19	2015	1	2015-01-19	26.58	0	78.25
20	2015	1	2015-01-20	26.22	0	80.25
21	2015	1	2015-01-21	26.46	0	77.75
22	2015	1	2015-01-22	26.86	0	82.5
23	2015	1	2015-01-23	26.66	0	76.25
24	2015	1	2015-01-24	25.66	0	87.25
25	2015	1	2015-01-25	26.5	0	82
26	2015	1	2015-01-26	26.94	0	75.75
27	2015	1	2015-01-27	26.62	0	75.75
28	2015	1	2015-01-28	26.58	0	70.25
29	2015	1	2015-01-29	26.34	0	79.25
30	2015	1	2015-01-30	27.1	0	76.25
31	2015	1	2015-01-31	26.86	0	78.25
1	2015	2	2015-02-01	27.48	0	71
2	2015	2	2015-02-02	26.9	0	77.75
3	2015	2	2015-02-03	26.74	0	76
4	2015	2	2015-02-04	27.38	0	78
5	2015	2	2015-02-05	27.5	0	79.5
6	2015	2	2015-02-06	28.54	0	67
7	2015	2	2015-02-07	28.2	0	72.75
8	2015	2	2015-02-08	27.1	0	71.75
9	2015	2	2015-02-09	26.8	0	75.5
10	2015	2	2015-02-10	26.82	0	72.5
11	2015	2	2015-02-11	26.34	0	72.25
12	2015	2	2015-02-12	25.9	0	88.75
13	2015	2	2015-02-13	26.14	0	90.25
14	2015	2	2015-02-14	26.5	0	67.25
15	2015	2	2015-02-15	26.9	0	73.25
16	2015	2	2015-02-16	27.14	0	72.5
17	2015	2	2015-02-17	27.22	0	82.75
18	2015	2	2015-02-18	26.38	0	85.75
19	2015	2	2015-02-19	25.78	0	92.75
20	2015	2	2015-02-20	24.74	0	95.5
21	2015	2	2015-02-21	24	0	96
22	2015	2	2015-02-22	24.88	23.4	97.25
23	2015	2	2015-02-23	24.04	16	91
24	2015	2	2015-02-24	24.88	0	85.5
25	2015	2	2015-02-25	25.64	0	84.75
26	2015	2	2015-02-26	24.94	1	89.75
27	2015	2	2015-02-27	26.42	0	79.5
28	2015	2	2015-02-28	25	0	78
1	2015	3	2015-03-01	25.5	0	79
2	2015	3	2015-03-02	26	0	79.25
3	2015	3	2015-03-03	26.78	0.2	73
4	2015	3	2015-03-04	25.88	0	81.25
5	2015	3	2015-03-05	25.76	2.2	87
6	2015	3	2015-03-06	26.14	1.4	81
7	2015	3	2015-03-07	26.04	0	75
8	2015	3	2015-03-08	26.28	0	75
9	2015	3	2015-03-09	26.64	0	75
10	2015	3	2015-03-10	27	0	73.5
11	2015	3	2015-03-11	26.86	0	68
12	2015	3	2015-03-12	26.42	0	69.25
13	2015	3	2015-03-13	26.56	0	74.5
14	2015	3	2015-03-14	25.6	0	74.75
15	2015	3	2015-03-15	26.26	0	67.5
16	2015	3	2015-03-16	25.86	0	73
17	2015	3	2015-03-17	27.08	0	74.25
18	2015	3	2015-03-18	25.92	4.8	78.25
19	2015	3	2015-03-19	25.96	0	74.5
20	2015	3	2015-03-20	26.06	0	74.5
21	2015	3	2015-03-21	24.98	0	85
22	2015	3	2015-03-22	26.22	4	84.25
23	2015	3	2015-03-23	26.54	0	78.5
24	2015	3	2015-03-24	26.96	0	78.25
25	2015	3	2015-03-25	27.54	0	76.5
26	2015	3	2015-03-26	25.82	5	89
27	2015	3	2015-03-27	27.46	1	78.25
28	2015	3	2015-03-28	27.78	0	73
29	2015	3	2015-03-29	26.3	0	87.25
30	2015	3	2015-03-30	26.2	0	74.25
31	2015	3	2015-03-31	26.26	0	76.25
1	2015	4	2015-04-01	25.88	0	74.75
2	2015	4	2015-04-02	25.78	0	72
3	2015	4	2015-04-03	26.3	0	81
4	2015	4	2015-04-04	26.66	0	77.25
5	2015	4	2015-04-05	27.36	0	79.25
6	2015	4	2015-04-06	28.42	0	67.25
7	2015	4	2015-04-07	29.64	0	70
8	2015	4	2015-04-08	24.56	1	87.25
9	2015	4	2015-04-09	26.26	1.5	83.25
10	2015	4	2015-04-10	24.38	20.4	95.5
11	2015	4	2015-04-11	22.94	5	95
12	2015	4	2015-04-12	25.46	0	79
13	2015	4	2015-04-13	24.7	0.5	88.25
14	2015	4	2015-04-14	25.34	0	87.5
15	2015	4	2015-04-15	25.22	0	90.75
16	2015	4	2015-04-16	25.9	0	76.25
17	2015	4	2015-04-17	25.84	0	83.25
18	2015	4	2015-04-18	26.66	0	80.25
19	2015	4	2015-04-19	25.98	0	85.5
20	2015	4	2015-04-20	26.38	0	81.75
21	2015	4	2015-04-21	27.86	0	68
22	2015	4	2015-04-22	27	0	79.5
23	2015	4	2015-04-23	26.86	0	82.25
24	2015	4	2015-04-24	27.08	0	92.5
25	2015	4	2015-04-25	26.2	0	86.25
26	2015	4	2015-04-26	25.94	0.4	88
27	2015	4	2015-04-27	23.42	8.5	95
28	2015	4	2015-04-28	25.24	1.1	86.75
29	2015	4	2015-04-29	25.38	0	84
30	2015	4	2015-04-30	25.22	0	86.25
1	2015	5	2015-05-01	23.82	0	89.5
2	2015	5	2015-05-02	23.3	3.1	92.75
3	2015	5	2015-05-03	24.08	1	89.25
4	2015	5	2015-05-04	24.42	3.9	90.25
5	2015	5	2015-05-05	24.8	0	89.75
6	2015	5	2015-05-06	25.32	2.2	80
7	2015	5	2015-05-07	24.8	0	83.75
8	2015	5	2015-05-08	25.34	0	81
9	2015	5	2015-05-09	23.68	0.1	86
10	2015	5	2015-05-10	23.62	10.2	92.75
11	2015	5	2015-05-11	23.68	2.4	88.5
12	2015	5	2015-05-12	25.62	0	81.5
13	2015	5	2015-05-13	25.4	0	91
14	2015	5	2015-05-14	24.6	0	86.25
15	2015	5	2015-05-15	21.78	41.2	95.25
16	2015	5	2015-05-16	22.26	37.8	95.5
17	2015	5	2015-05-17	23.14	31.3	91.5
18	2015	5	2015-05-18	23.3	11	85
19	2015	5	2015-05-19	22.98	1.6	92.25
20	2015	5	2015-05-20	23.54	0	87.25
21	2015	5	2015-05-21	23.1	2.2	92.5
22	2015	5	2015-05-22	23.22	7.1	91.75
23	2015	5	2015-05-23	23	1.6	92
24	2015	5	2015-05-24	23.18	1.4	87.5
25	2015	5	2015-05-25	23.02	1.8	91.5
26	2015	5	2015-05-26	23.1	3	95.5
27	2015	5	2015-05-27	23.04	2.7	87.75
28	2015	5	2015-05-28	22.88	0	89.25
29	2015	5	2015-05-29	23.28	0	87.25
30	2015	5	2015-05-30	23.6	0	90
31	2015	5	2015-05-31	23.34	0	91.25
1	2015	6	2015-06-01	23	1	92
2	2015	6	2015-06-02	23.08	1.8	94.5
3	2015	6	2015-06-03	23.06	1	89.75
4	2015	6	2015-06-04	22.9	11.3	93.25
5	2015	6	2015-06-05	23.46	5	85.75
6	2015	6	2015-06-06	23.66	7.8	95.75
7	2015	6	2015-06-07	23.1	14.6	94.5
8	2015	6	2015-06-08	23.06	2	93
9	2015	6	2015-06-09	23.78	3.2	88.5
10	2015	6	2015-06-10	24.02	1	90
11	2015	6	2015-06-11	23.62	4.2	85.75
12	2015	6	2015-06-12	22.78	0	83.5
13	2015	6	2015-06-13	23.42	0	88.5
14	2015	6	2015-06-14	22.74	2.4	94.75
15	2015	6	2015-06-15	23.42	2.6	87.75
16	2015	6	2015-06-16	22	0	86
17	2015	6	2015-06-17	22.82	0	80.75
18	2015	6	2015-06-18	22.58	0	88.75
19	2015	6	2015-06-19	22.56	0	88.25
20	2015	6	2015-06-20	22.16	6.2	87.5
21	2015	6	2015-06-21	22.02	0	88.25
22	2015	6	2015-06-22	22.34	0	86.5
23	2015	6	2015-06-23	21.4	0	95.75
24	2015	6	2015-06-24	22.4	3.2	90
25	2015	6	2015-06-25	21.58	2.8	91.75
26	2015	6	2015-06-26	21	7	95
27	2015	6	2015-06-27	20.54	13.6	96
28	2015	6	2015-06-28	21.94	5.6	94.5
29	2015	6	2015-06-29	22.54	2.2	97.75
30	2015	6	2015-06-30	22.94	5	86.75
1	2015	7	2015-07-01	21.9	0.2	85.25
2	2015	7	2015-07-02	22.14	0	85
3	2015	7	2015-07-03	21.96	0	92.25
4	2015	7	2015-07-04	23.06	0	89
5	2015	7	2015-07-05	23.76	0	88.25
6	2015	7	2015-07-06	22.8	2.4	87.25
7	2015	7	2015-07-07	21.76	15.8	98.25
8	2015	7	2015-07-08	21.9	24.2	95.5
9	2015	7	2015-07-09	22.44	0	94.5
10	2015	7	2015-07-10	22.84	0	92.25
11	2015	7	2015-07-11	22.48	0	87.5
12	2015	7	2015-07-12	21.66	6.8	91.5
13	2015	7	2015-07-13	23.02	1	88.5
14	2015	7	2015-07-14	23.12	0	83.5
15	2015	7	2015-07-15	22.66	3.6	88.75
16	2015	7	2015-07-16	21.54	5.8	90.5
17	2015	7	2015-07-17	22.18	6.5	90
18	2015	7	2015-07-18	21.58	2.2	84.75
19	2015	7	2015-07-19	21.42	2.5	88.75
20	2015	7	2015-07-20	22.02	1	87.75
21	2015	7	2015-07-21	20.96	0	84.25
22	2015	7	2015-07-22	21.3	0	86.5
23	2015	7	2015-07-23	21.9	0	90.5
24	2015	7	2015-07-24	21.88	7.1	93
25	2015	7	2015-07-25	21.54	1.6	87.75
26	2015	7	2015-07-26	21.7	0.6	88
27	2015	7	2015-07-27	22.34	0	81.75
28	2015	7	2015-07-28	22.2	0	81.5
29	2015	7	2015-07-29	21	0	89
30	2015	7	2015-07-30	21.64	0	90.75
31	2015	7	2015-07-31	21.24	4.6	83.75
1	2015	8	2015-08-01	21	1	86.5
2	2015	8	2015-08-02	20.98	6.6	87
3	2015	8	2015-08-03	20.34	0	89.75
4	2015	8	2015-08-04	20.54	1.8	85.5
5	2015	8	2015-08-05	21.38	0	89.5
6	2015	8	2015-08-06	21.04	3.8	87
7	2015	8	2015-08-07	20.74	0	81.25
8	2015	8	2015-08-08	20.86	0	80.25
9	2015	8	2015-08-09	20.82	0.3	95
10	2015	8	2015-08-10	22	0.7	93
11	2015	8	2015-08-11	20.5	1.4	83.75
12	2015	8	2015-08-12	20.66	0	83.25
13	2015	8	2015-08-13	21.42	0	82.25
14	2015	8	2015-08-14	21.68	0	94.25
15	2015	8	2015-08-15	21	0	90.2
16	2015	8	2015-08-16	22	0	91
17	2015	8	2015-08-17	21.46	0	89.75
18	2015	8	2015-08-18	20.94	1	97
19	2015	8	2015-08-19	21.84	4.6	88.5
20	2015	8	2015-08-20	22.1	0	91.5
21	2015	8	2015-08-21	22.36	0	90
22	2015	8	2015-08-22	22.68	0	84.75
23	2015	8	2015-08-23	22.5	0	81
24	2015	8	2015-08-24	21.54	0	81
25	2015	8	2015-08-25	21.68	0	84.25
26	2015	8	2015-08-26	23.38	0	85.5
27	2015	8	2015-08-27	24.72	0	81
28	2015	8	2015-08-28	23.62	0	83
29	2015	8	2015-08-29	22	0	90
30	2015	8	2015-08-30	22.34	0	82.25
31	2015	8	2015-08-31	22.22	0	82.5
1	2015	9	2015-09-01	23.14	0	79
2	2015	9	2015-09-02	22.16	0	83.5
3	2015	9	2015-09-03	21.74	0	85
4	2015	9	2015-09-04	22.82	0	86.75
5	2015	9	2015-09-05	24.44	0	78.25
6	2015	9	2015-09-06	24.36	0	79.25
7	2015	9	2015-09-07	22.72	0	77.25
8	2015	9	2015-09-08	23.5	0	74.25
9	2015	9	2015-09-09	24.06	0	78.5
10	2015	9	2015-09-10	23.82	0	79.25
11	2015	9	2015-09-11	23.62	0	78.5
12	2015	9	2015-09-12	23.88	0	75.75
13	2015	9	2015-09-13	24.62	0	72.5
14	2015	9	2015-09-14	23.6	0	78.5
15	2015	9	2015-09-15	23.78	1.2	79.25
16	2015	9	2015-09-16	22.64	0	85
17	2015	9	2015-09-17	22.86	2.2	80.25
18	2015	9	2015-09-18	23.42	0	79
19	2015	9	2015-09-19	22.34	3.4	93
20	2015	9	2015-09-20	22.52	7.6	93.5
21	2015	9	2015-09-21	22.88	7.6	81.25
22	2015	9	2015-09-22	23.06	0	79
23	2015	9	2015-09-23	23	0	76.4
24	2015	9	2015-09-24	24.34	0	72.25
25	2015	9	2015-09-25	24.42	0	76.25
26	2015	9	2015-09-26	23.84	0	78
27	2015	9	2015-09-27	23.54	0	75.5
28	2015	9	2015-09-28	23.68	0	76.75
29	2015	9	2015-09-29	23.96	0	75.25
30	2015	9	2015-09-30	23.9	0	70.75
1	2015	10	2015-10-01	24.6	0	78
2	2015	10	2015-10-02	23.48	0	63.5
3	2015	10	2015-10-03	23.42	0	73.5
4	2015	10	2015-10-04	23.22	0	80
5	2015	10	2015-10-05	25.78	0	71.25
6	2015	10	2015-10-06	25.68	0	78
7	2015	10	2015-10-07	24.38	1.2	84.5
8	2015	10	2015-10-08	23.96	0	73.25
9	2015	10	2015-10-09	22.3	0.2	93.5
10	2015	10	2015-10-10	23.04	2.3	87.25
11	2015	10	2015-10-11	24.08	0	73.5
12	2015	10	2015-10-12	22.8	0	76
13	2015	10	2015-10-13	24.42	0	74
14	2015	10	2015-10-14	24.54	0	84.25
15	2015	10	2015-10-15	24.94	7.5	75.25
16	2015	10	2015-10-16	24.64	0	74.5
17	2015	10	2015-10-17	23.96	0	72
18	2015	10	2015-10-18	24.38	0	75.75
19	2015	10	2015-10-19	24.6	0	77.5
20	2015	10	2015-10-20	24.44	0	73.75
21	2015	10	2015-10-21	25.26	0	70.5
22	2015	10	2015-10-22	25.68	0	70
23	2015	10	2015-10-23	26.12	0	73.5
24	2015	10	2015-10-24	24.58	0	83.5
25	2015	10	2015-10-25	24.62	0	76.25
26	2015	10	2015-10-26	25.5	0	74.75
27	2015	10	2015-10-27	24.8	0	80.5
28	2015	10	2015-10-28	25.42	0	71.5
29	2015	10	2015-10-29	25.82	0	76
30	2015	10	2015-10-30	25.38	0	79.75
31	2015	10	2015-10-31	25.02	0	74
1	2015	11	2015-11-01	25.38	0	68.75
2	2015	11	2015-11-02	25.72	0	67
3	2015	11	2015-11-03	26.42	0	65.75
4	2015	11	2015-11-04	25.84	0	67.25
5	2015	11	2015-11-05	26.08	0	64.75
6	2015	11	2015-11-06	25.36	0	71.5
7	2015	11	2015-11-07	26.26	0	69.5
8	2015	11	2015-11-08	25.86	0	64.25
9	2015	11	2015-11-09	24.5	4.1	76.75
10	2015	11	2015-11-10	25.18	0	66.5
11	2015	11	2015-11-11	25.28	0	68.5
12	2015	11	2015-11-12	26.36	0	61.5
13	2015	11	2015-11-13	26.38	0	63.5
14	2015	11	2015-11-14	27.72	0	64.75
15	2015	11	2015-11-15	28.34	0	66.5
16	2015	11	2015-11-16	27.88	0	67.75
17	2015	11	2015-11-17	27.46	0	63.75
18	2015	11	2015-11-18	26.64	0	66
19	2015	11	2015-11-19	26.88	0	67
20	2015	11	2015-11-20	27.64	0	65.75
21	2015	11	2015-11-21	27.58	0	62
22	2015	11	2015-11-22	27.88	0	67
23	2015	11	2015-11-23	27.3	0	65.75
24	2015	11	2015-11-24	27.54	0	67
25	2015	11	2015-11-25	29.64	0	57.25
26	2015	11	2015-11-26	29.8	0	62.75
27	2015	11	2015-11-27	26.46	0	78
28	2015	11	2015-11-28	27.72	0	67
29	2015	11	2015-11-29	26.9	0	65.75
30	2015	11	2015-11-30	26.8	0	57.75
1	2015	12	2015-12-01	26.66	0	69
2	2015	12	2015-12-02	26.68	0	65.5
3	2015	12	2015-12-03	27.58	0	58
4	2015	12	2015-12-04	27.48	0	63
5	2015	12	2015-12-05	28.24	0	61
6	2015	12	2015-12-06	28.68	0	58.75
7	2015	12	2015-12-07	27.7	0	66.75
8	2015	12	2015-12-08	27.22	0	65.75
9	2015	12	2015-12-09	27.64	0	63.5
10	2015	12	2015-12-10	26.26	0	65.25
11	2015	12	2015-12-11	26.82	0	65
12	2015	12	2015-12-12	27.22	0	71.25
13	2015	12	2015-12-13	27.02	0	73
14	2015	12	2015-12-14	26.82	0	67
15	2015	12	2015-12-15	25.92	0	64
16	2015	12	2015-12-16	26.56	0	68.25
17	2015	12	2015-12-17	27.52	0	67.25
18	2015	12	2015-12-18	27.3	0	67.25
19	2015	12	2015-12-19	26.06	0	71
20	2015	12	2015-12-20	26.82	0	68.25
21	2015	12	2015-12-21	26.5	0	69.75
22	2015	12	2015-12-22	25.78	0	71
23	2015	12	2015-12-23	25.26	1.5	71.25
24	2015	12	2015-12-24	27.28	0	69.25
25	2015	12	2015-12-25	27.12	0	72.75
26	2015	12	2015-12-26	27.4	0.3	65.75
27	2015	12	2015-12-27	26.72	0	68.75
28	2015	12	2015-12-28	26.62	0	75.5
29	2015	12	2015-12-29	27.14	0	75.5
30	2015	12	2015-12-30	27.78	0	69
31	2015	12	2015-12-31	27.6	0	64.75
1	2016	1	2016-01-01	28.62	0	46.5
2	2016	1	2016-01-02	29.02	0	66.5
3	2016	1	2016-01-03	28	0	69.75
4	2016	1	2016-01-04	27	0	77.5
5	2016	1	2016-01-05	28.38	1.6	78.5
6	2016	1	2016-01-06	23.78	52.2	90.25
7	2016	1	2016-01-07	26.32	0	90.5
8	2016	1	2016-01-08	26.28	32.5	87
9	2016	1	2016-01-09	25.38	0	76.25
10	2016	1	2016-01-10	25.44	0	92
11	2016	1	2016-01-11	26.22	6.1	94.75
12	2016	1	2016-01-12	28.02	1.5	88.25
13	2016	1	2016-01-13	26.52	0	95.75
14	2016	1	2016-01-14	28.3	0	77.25
15	2016	1	2016-01-15	27.8	0	86.5
16	2016	1	2016-01-16	27.58	0	91.75
17	2016	1	2016-01-17	25.82	3	98
18	2016	1	2016-01-18	25.14	4	92.5
19	2016	1	2016-01-19	27.18	11.4	89.25
20	2016	1	2016-01-20	25.32	0	96.75
21	2016	1	2016-01-21	24.52	43.8	95.25
22	2016	1	2016-01-22	23.74	12.8	98.5
23	2016	1	2016-01-23	25.28	2.5	90.75
24	2016	1	2016-01-24	25.64	3.2	88.25
25	2016	1	2016-01-25	26.66	52.8	91
26	2016	1	2016-01-26	26.9	0	80.5
27	2016	1	2016-01-27	26.08	0	87
28	2016	1	2016-01-28	26.72	2	80.5
29	2016	1	2016-01-29	26.48	0	75
30	2016	1	2016-01-30	24.94	6	81.5
31	2016	1	2016-01-31	24.86	0	87.75
1	2016	2	2016-02-01	25	0	76
2	2016	2	2016-02-02	24.3	0	90.25
3	2016	2	2016-02-03	25.58	2	80.75
4	2016	2	2016-02-04	25.7	0	77
5	2016	2	2016-02-05	26.02	0	76.25
6	2016	2	2016-02-06	26.6	0	68.75
7	2016	2	2016-02-07	26.98	0	60.25
8	2016	2	2016-02-08	26.82	0	67.5
9	2016	2	2016-02-09	26.74	0	79.5
10	2016	2	2016-02-10	27.34	0	93.25
11	2016	2	2016-02-11	26.82	0	73.25
12	2016	2	2016-02-12	26.66	0	65.25
13	2016	2	2016-02-13	27.2	0	78.5
14	2016	2	2016-02-14	27.1	0	76.5
15	2016	2	2016-02-15	27.42	0	74.5
16	2016	2	2016-02-16	27.52	0	73.25
17	2016	2	2016-02-17	26.98	0	65.75
18	2016	2	2016-02-18	27.02	1	70.25
19	2016	2	2016-02-19	25	0	75.3
20	2016	2	2016-02-20	26.5	0.4	81.3
21	2016	2	2016-02-21	27	1.3	90
22	2016	2	2016-02-22	26	2.6	79.5
23	2016	2	2016-02-23	26.22	0	75.25
24	2016	2	2016-02-24	25.56	0	80.5
25	2016	2	2016-02-25	26.46	0	73.75
26	2016	2	2016-02-26	26.56	0	71.5
27	2016	2	2016-02-27	27	0	71.5
28	2016	2	2016-02-28	26.32	0	76.5
29	2016	2	2016-02-29	27.54	0	68.75
1	2016	3	2016-03-01	27.66	0	61.25
2	2016	3	2016-03-02	27.14	0	74.25
3	2016	3	2016-03-03	27.62	0	71
4	2016	3	2016-03-04	28.14	0	76.25
5	2016	3	2016-03-05	29.16	0	56.75
6	2016	3	2016-03-06	28.66	0	66.5
7	2016	3	2016-03-07	26.98	0	67.75
8	2016	3	2016-03-08	26.54	0	73.25
9	2016	3	2016-03-09	27.58	0	71.25
10	2016	3	2016-03-10	26.86	0	74.75
11	2016	3	2016-03-11	27.66	0	66
12	2016	3	2016-03-12	27.76	0	66
13	2016	3	2016-03-13	27.7	0	65.75
14	2016	3	2016-03-14	25.68	0.8	77.25
15	2016	3	2016-03-15	25	0.4	70
16	2016	3	2016-03-16	26.42	0	69.5
17	2016	3	2016-03-17	26	0	72
18	2016	3	2016-03-18	27.1	0	73.75
19	2016	3	2016-03-19	27.42	0	71
20	2016	3	2016-03-20	27.18	0	70.75
21	2016	3	2016-03-21	27.4	0	73
22	2016	3	2016-03-22	27.88	0	67.75
23	2016	3	2016-03-23	27.96	0	69.25
24	2016	3	2016-03-24	27.46	0	76.5
25	2016	3	2016-03-25	27.58	0	71.25
26	2016	3	2016-03-26	27.52	0	70
27	2016	3	2016-03-27	27.04	6	71.75
28	2016	3	2016-03-28	26.38	1.8	80
29	2016	3	2016-03-29	26.98	0.8	72.5
30	2016	3	2016-03-30	27.5	0.8	69.75
31	2016	3	2016-03-31	26	0	77
1	2016	4	2016-04-01	26.22	0	72
2	2016	4	2016-04-02	26.58	0	72
3	2016	4	2016-04-03	25.58	0	80.75
4	2016	4	2016-04-04	26.6	0	74.25
5	2016	4	2016-04-05	27.04	0	74
6	2016	4	2016-04-06	25	0	70
7	2016	4	2016-04-07	26.5	0	65.5
8	2016	4	2016-04-08	25.8	0	66
9	2016	4	2016-04-09	26.3	0	70
10	2016	4	2016-04-10	27.04	0	69.5
11	2016	4	2016-04-11	27.38	0	73.75
12	2016	4	2016-04-12	26.62	0	67.5
13	2016	4	2016-04-13	26.62	0	71.75
14	2016	4	2016-04-14	23.5	12	94
15	2016	4	2016-04-15	25.14	6.6	83.25
16	2016	4	2016-04-16	26.34	0	72
17	2016	4	2016-04-17	25.1	0	84.75
18	2016	4	2016-04-18	25.68	4.8	76.25
19	2016	4	2016-04-19	25.14	0	66.75
20	2016	4	2016-04-20	24.98	0	72.5
21	2016	4	2016-04-21	25.5	0	67
22	2016	4	2016-04-22	25.58	0	68.75
23	2016	4	2016-04-23	25.1	0	71.5
24	2016	4	2016-04-24	25.28	0	71
25	2016	4	2016-04-25	25.04	0	74.75
26	2016	4	2016-04-26	25.06	0	69.5
27	2016	4	2016-04-27	26.74	0	69.75
28	2016	4	2016-04-28	27.38	0	70.25
29	2016	4	2016-04-29	26.58	0	74
30	2016	4	2016-04-30	26.68	0	70.5
1	2016	5	2016-05-01	26.36	0	71.75
2	2016	5	2016-05-02	25	0	74
3	2016	5	2016-05-03	23.24	6.8	96.5
4	2016	5	2016-05-04	24.82	8	77.5
5	2016	5	2016-05-05	24.9	0	77
6	2016	5	2016-05-06	25.34	0	76.75
7	2016	5	2016-05-07	24.24	3.2	86.5
8	2016	5	2016-05-08	24.66	0	78
9	2016	5	2016-05-09	24.16	0	70.25
10	2016	5	2016-05-10	24.2	0	77.5
11	2016	5	2016-05-11	25.06	0	80
12	2016	5	2016-05-12	24.08	0	82
13	2016	5	2016-05-13	25.14	0	74.25
14	2016	5	2016-05-14	24.88	0	82.75
15	2016	5	2016-05-15	23.44	7.5	90.75
16	2016	5	2016-05-16	23.84	0	92.75
17	2016	5	2016-05-17	24.02	4.6	89.25
18	2016	5	2016-05-18	24.78	0	80.5
19	2016	5	2016-05-19	24	0	76
20	2016	5	2016-05-20	23.92	0	84.5
21	2016	5	2016-05-21	24.62	0	80.5
22	2016	5	2016-05-22	25	0	81.1
23	2016	5	2016-05-23	24.8	0	82.25
24	2016	5	2016-05-24	24.52	0.4	96
25	2016	5	2016-05-25	23.3	6.8	95.75
26	2016	5	2016-05-26	22.96	23.3	87.75
27	2016	5	2016-05-27	22.98	0.8	87.5
28	2016	5	2016-05-28	24.82	0	75.25
29	2016	5	2016-05-29	25	0	80
30	2016	5	2016-05-30	24.4	0	86
31	2016	5	2016-05-31	25.5	0	85.25
1	2016	6	2016-06-01	26	0	83
2	2016	6	2016-06-02	26.5	0	82.5
3	2016	6	2016-06-03	25.5	0	76.5
4	2016	6	2016-06-04	26	0	82.25
5	2016	6	2016-06-05	24.6	0	79
6	2016	6	2016-06-06	24.86	0	81.75
7	2016	6	2016-06-07	25	0	81.5
8	2016	6	2016-06-08	24.7	0	82
9	2016	6	2016-06-09	25.3	0	80.5
10	2016	6	2016-06-10	25.22	0	85.75
11	2016	6	2016-06-11	26	0	85
12	2016	6	2016-06-12	25.02	0	85.75
13	2016	6	2016-06-13	23.88	0.2	89.5
14	2016	6	2016-06-14	21.2	0.29	97.75
15	2016	6	2016-06-15	23.26	0.281	78.25
16	2016	6	2016-06-16	21.76	0.29	80.5
17	2016	6	2016-06-17	22.54	0	84.25
18	2016	6	2016-06-18	22.28	0	86
19	2016	6	2016-06-19	23	1.4	89
20	2016	6	2016-06-20	22.98	6.5	86.5
21	2016	6	2016-06-21	22.7	0.3	88
22	2016	6	2016-06-22	23.24	0.3	85.5
23	2016	6	2016-06-23	22.42	0	82.75
24	2016	6	2016-06-24	23.4	0	80.75
25	2016	6	2016-06-25	23.32	0	79.75
26	2016	6	2016-06-26	22.23	2	94.25
27	2016	6	2016-06-27	22.7	9.8	89.75
28	2016	6	2016-06-28	23.55	0	82.5
29	2016	6	2016-06-29	24.01	1.4	88
30	2016	6	2016-06-30	24.02	1.6	90
1	2016	7	2016-07-01	23.55	4.8	74.5
2	2016	7	2016-07-02	24.44	0.5	85.75
3	2016	7	2016-07-03	23.76	0	83.75
4	2016	7	2016-07-04	24.33	0	80.5
5	2016	7	2016-07-05	23.97	9	80.5
6	2016	7	2016-07-06	24.7	0	83
7	2016	7	2016-07-07	26.77	0	89.53
8	2016	7	2016-07-08	27.19	0	89
9	2016	7	2016-07-09	23.45	12.2	84.75
10	2016	7	2016-07-10	24.28	0.8	82
11	2016	7	2016-07-11	22.98	0	81.75
12	2016	7	2016-07-12	22.77	0	84
13	2016	7	2016-07-13	23.6	0	85.25
14	2016	7	2016-07-14	24.54	2.1	74.5
15	2016	7	2016-07-15	23.39	0	89.75
16	2016	7	2016-07-16	25.27	0	62.5
17	2016	7	2016-07-17	23.81	0	75
18	2016	7	2016-07-18	21.1	0	79
19	2016	7	2016-07-19	24.8	0	67.5
20	2016	7	2016-07-20	24.54	0	71
21	2016	7	2016-07-21	22.92	0	74.25
22	2016	7	2016-07-22	25.95	0	82
23	2016	7	2016-07-23	23.24	0	87.9
24	2016	7	2016-07-24	24.02	0	89.25
25	2016	7	2016-07-25	23.81	7.2	82
26	2016	7	2016-07-26	23.08	1.4	86
27	2016	7	2016-07-27	24.86	0	85.5
28	2016	7	2016-07-28	24.23	0	77.5
29	2016	7	2016-07-29	21.83	1	85.25
30	2016	7	2016-07-30	22.87	4.3	84.5
31	2016	7	2016-07-31	24.54	3.4	90.25
1	2016	8	2016-08-01	24.18	1.4	86
2	2016	8	2016-08-02	22.66	0	75.25
3	2016	8	2016-08-03	21.62	0	77.5
4	2016	8	2016-08-04	25.9	0	85.75
5	2016	8	2016-08-05	25.69	0	66.5
6	2016	8	2016-08-06	22.77	0	69.25
7	2016	8	2016-08-07	24.02	0	86.4
8	2016	8	2016-08-08	25.27	0	69.75
9	2016	8	2016-08-09	22.66	0	73.5
10	2016	8	2016-08-10	22.87	0	72.5
11	2016	8	2016-08-11	24.65	0	72.75
12	2016	8	2016-08-12	23.18	0	76
13	2016	8	2016-08-13	24.86	0	66.5
14	2016	8	2016-08-14	26.63	0	70
15	2016	8	2016-08-15	25.38	0	72.75
16	2016	8	2016-08-16	26	0	71.75
17	2016	8	2016-08-17	26.47	0	72.5
18	2016	8	2016-08-18	27.05	0	69.75
19	2016	8	2016-08-19	25.85	0	80
20	2016	8	2016-08-20	25.9	0	67.5
21	2016	8	2016-08-21	23.29	0	66
22	2016	8	2016-08-22	23.92	0	73
23	2016	8	2016-08-23	24.54	5.2	95.25
24	2016	8	2016-08-24	24.75	19.4	82.5
25	2016	8	2016-08-25	25.8	0	91
26	2016	8	2016-08-26	24.39	0	75.5
27	2016	8	2016-08-27	26.21	0	66
28	2016	8	2016-08-28	25.95	0	82.5
29	2016	8	2016-08-29	25.27	0	83.5
30	2016	8	2016-08-30	25.69	0.4	75
31	2016	8	2016-08-31	24.54	0	82.75
1	2016	9	2016-09-01	22.87	0	79.5
2	2016	9	2016-09-02	22.98	2	88
3	2016	9	2016-09-03	23.39	9.5	91
4	2016	9	2016-09-04	26.53	7.6	88.25
5	2016	9	2016-09-05	23.6	1.1	82
6	2016	9	2016-09-06	24.65	0	70
7	2016	9	2016-09-07	25.17	0	79
8	2016	9	2016-09-08	24.96	0	77
9	2016	9	2016-09-09	24.33	0	80.25
10	2016	9	2016-09-10	24.23	0	79.25
11	2016	9	2016-09-11	24.23	0	76.25
12	2016	9	2016-09-12	25.17	0	68.25
13	2016	9	2016-09-13	26.84	3.8	81
14	2016	9	2016-09-14	27.68	0	71
15	2016	9	2016-09-15	25.9	0	70
16	2016	9	2016-09-16	27.81	0	70.5
17	2016	9	2016-09-17	25.38	0	62.5
18	2016	9	2016-09-18	26.74	0	82.91
19	2016	9	2016-09-19	28.51	0	67.75
20	2016	9	2016-09-20	27.31	0	72.5
21	2016	9	2016-09-21	24.7	0	80.75
22	2016	9	2016-09-22	26.21	0.1	80.63
23	2016	9	2016-09-23	27.62	3	83.25
24	2016	9	2016-09-24	27.05	0	70.25
25	2016	9	2016-09-25	26.79	0	71.25
26	2016	9	2016-09-26	25.38	0	77
27	2016	9	2016-09-27	26.74	2.6	82.25
28	2016	9	2016-09-28	27.68	0	92.5
29	2016	9	2016-09-29	29.24	3.8	74
30	2016	9	2016-09-30	27.57	0	80.25
1	2016	10	2016-10-01	27.36	0	81.5
2	2016	10	2016-10-02	28.09	0	73.5
3	2016	10	2016-10-03	28.51	0	64.5
4	2016	10	2016-10-04	29.35	0	66.25
5	2016	10	2016-10-05	29.14	0	72.25
6	2016	10	2016-10-06	29.45	3.2	75.25
7	2016	10	2016-10-07	28.51	2.6	74.5
8	2016	10	2016-10-08	28.09	0	70.5
9	2016	10	2016-10-09	27.47	0	74.5
10	2016	10	2016-10-10	26.11	0	72.75
11	2016	10	2016-10-11	27.47	0.9	81
12	2016	10	2016-10-12	26.74	0	77.5
13	2016	10	2016-10-13	27.15	0	69
14	2016	10	2016-10-14	26.53	0	66
15	2016	10	2016-10-15	27.05	0	69.25
16	2016	10	2016-10-16	27.78	0	77.25
17	2016	10	2016-10-17	28.77	1.4	62
18	2016	10	2016-10-18	27.99	0	69.5
19	2016	10	2016-10-19	28.41	0	66
20	2016	10	2016-10-20	28.72	0	64.75
21	2016	10	2016-10-21	28.2	0	70
22	2016	10	2016-10-22	27.88	0	76.25
23	2016	10	2016-10-23	27.57	0	76.17
24	2016	10	2016-10-24	30.23	0	71
25	2016	10	2016-10-25	30.08	0	68
26	2016	10	2016-10-26	28.51	0	63.25
27	2016	10	2016-10-27	27.62	0	64.25
28	2016	10	2016-10-28	27.73	0	66
29	2016	10	2016-10-29	28.93	0	72.25
30	2016	10	2016-10-30	27.88	6.2	72.5
31	2016	10	2016-10-31	29.66	0	66.75
1	2016	11	2016-11-01	30.01	0	66.25
2	2016	11	2016-11-02	28.92	0	68.25
3	2016	11	2016-11-03	29.17	0	69.25
4	2016	11	2016-11-04	29.94	2	72.75
5	2016	11	2016-11-05	30.06	0.7	74.25
6	2016	11	2016-11-06	29.77	6.9	73.5
7	2016	11	2016-11-07	30.03	0	72.25
8	2016	11	2016-11-08	30.49	0	70
9	2016	11	2016-11-09	30.46	0.2	69.75
10	2016	11	2016-11-10	30.43	0	73.75
11	2016	11	2016-11-11	30.39	5.4	75.25
12	2016	11	2016-11-12	30.71	1.5	70.5
13	2016	11	2016-11-13	30.59	0	68.5
14	2016	11	2016-11-14	30.98	0	70.75
15	2016	11	2016-11-15	30.64	0	69.5
16	2016	11	2016-11-16	29.82	0	67.5
17	2016	11	2016-11-17	29.21	0	63.5
18	2016	11	2016-11-18	29.63	0	69.75
19	2016	11	2016-11-19	29.43	44.9	90
20	2016	11	2016-11-20	29.79	12.3	79
21	2016	11	2016-11-21	30.61	0	73
22	2016	11	2016-11-22	30.7	0	66.75
23	2016	11	2016-11-23	29.67	0	68.75
24	2016	11	2016-11-24	30.02	0	70.25
25	2016	11	2016-11-25	30.92	0	63
26	2016	11	2016-11-26	30.91	0	62.5
27	2016	11	2016-11-27	29.54	0	70.5
28	2016	11	2016-11-28	30.97	0	68
29	2016	11	2016-11-29	30.48	0	66.25
30	2016	11	2016-11-30	30.11	0	76.75
1	2016	12	2016-12-01	29.24	0	78.5
2	2016	12	2016-12-02	28.62	0	73.75
3	2016	12	2016-12-03	28.93	0	63.75
4	2016	12	2016-12-04	28.41	0	68.25
5	2016	12	2016-12-05	28.51	0	69.5
6	2016	12	2016-12-06	30.19	0	64
7	2016	12	2016-12-07	29.99	0	66.75
8	2016	12	2016-12-08	29.56	0	69.75
9	2016	12	2016-12-09	30.05	0	69.5
10	2016	12	2016-12-10	29.14	0	70.75
11	2016	12	2016-12-11	27.26	0	68.25
12	2016	12	2016-12-12	30.02	0	61
13	2016	12	2016-12-13	27.64	0	64.5
14	2016	12	2016-12-14	27.1	0	65.5
15	2016	12	2016-12-15	28.51	0	64
16	2016	12	2016-12-16	27.96	0	90.5
17	2016	12	2016-12-17	28.13	2.4	80.08
18	2016	12	2016-12-18	29.24	0	81.42
19	2016	12	2016-12-19	30.3	1	77.5
20	2016	12	2016-12-20	28.2	0	83.25
21	2016	12	2016-12-21	28.09	3.2	77.25
22	2016	12	2016-12-22	28.2	0	85.25
23	2016	12	2016-12-23	29.24	0	76.75
24	2016	12	2016-12-24	27.78	1	72.5
25	2016	12	2016-12-25	28.35	0	38
26	2016	12	2016-12-26	28.23	0	63.25
27	2016	12	2016-12-27	27.84	0	69.5
28	2016	12	2016-12-28	27.88	0	71.25
29	2016	12	2016-12-29	28.24	0	65.25
30	2016	12	2016-12-30	27.68	0	67.5
31	2016	12	2016-12-31	28.62	0	80.5
1	2017	1	2017-01-01	28.18	2.6	90
2	2017	1	2017-01-02	30.12	0	63
3	2017	1	2017-01-03	29.98	0	67
4	2017	1	2017-01-04	30.33	0	51
5	2017	1	2017-01-05	29.52	0	64
6	2017	1	2017-01-06	29.13	0	58
7	2017	1	2017-01-07	29.59	1.1	60
8	2017	1	2017-01-08	29.11	3.2	63
9	2017	1	2017-01-09	28.88	0	65
10	2017	1	2017-01-10	29.03	0	66
11	2017	1	2017-01-11	28.67	0	75
12	2017	1	2017-01-12	28.43	0	74
13	2017	1	2017-01-13	28.32	0	80
14	2017	1	2017-01-14	28.99	0	71
15	2017	1	2017-01-15	29.03	0	68
16	2017	1	2017-01-16	29.2	0	61
17	2017	1	2017-01-17	29.06	0	65
18	2017	1	2017-01-18	29.69	0	64
19	2017	1	2017-01-19	29.48	0	68
20	2017	1	2017-01-20	29.48	0	66
21	2017	1	2017-01-21	29.34	0	74
22	2017	1	2017-01-22	29.98	0	78
23	2017	1	2017-01-23	30.29	0	72
24	2017	1	2017-01-24	29.98	0	62
25	2017	1	2017-01-25	29.84	0	69
26	2017	1	2017-01-26	29.31	0	63
27	2017	1	2017-01-27	29.13	0	63
28	2017	1	2017-01-28	28.5	0	74
29	2017	1	2017-01-29	28.43	0	70
30	2017	1	2017-01-30	28.78	0	71
31	2017	1	2017-01-31	29.31	0	71
1	2017	2	2017-02-01	29.77	0	69
2	2017	2	2017-02-02	30.05	0	65
3	2017	2	2017-02-03	29.94	0	66
4	2017	2	2017-02-04	29.84	0	61
5	2017	2	2017-02-05	29.62	0	65
6	2017	2	2017-02-06	29.06	0	66
7	2017	2	2017-02-07	28.99	0	65
8	2017	2	2017-02-08	27.79	0	79
9	2017	2	2017-02-09	28.07	0	69
10	2017	2	2017-02-10	27.93	0	88
11	2017	2	2017-02-11	28.53	0	71
12	2017	2	2017-02-12	28.6	0	65
13	2017	2	2017-02-13	28.25	0	72
14	2017	2	2017-02-14	28.25	0	63
15	2017	2	2017-02-15	28.25	0	80
16	2017	2	2017-02-16	28.88	0	76
17	2017	2	2017-02-17	29.13	0	72
18	2017	2	2017-02-18	29.6	0	67
19	2017	2	2017-02-19	29.24	0	68
20	2017	2	2017-02-20	28.74	0	78
21	2017	2	2017-02-21	29.06	0	77
22	2017	2	2017-02-22	28.96	0	76
23	2017	2	2017-02-23	29.52	0	66
24	2017	2	2017-02-24	29.34	0	74
25	2017	2	2017-02-25	30.79	0	65
26	2017	2	2017-02-26	30.65	0	69
27	2017	2	2017-02-27	30.65	0	61
28	2017	2	2017-02-28	29.48	0	75
1	2017	3	2017-03-01	29.2	1.8	80
2	2017	3	2017-03-02	29.06	0	75
3	2017	3	2017-03-03	29.13	0	71
4	2017	3	2017-03-04	29.48	0	70
5	2017	3	2017-03-05	29.77	0	66
6	2017	3	2017-03-06	30.05	0	69
7	2017	3	2017-03-07	30.08	0	74
8	2017	3	2017-03-08	30.22	0	63
9	2017	3	2017-03-09	29.38	0	63
10	2017	3	2017-03-10	28.99	0	66
11	2017	3	2017-03-11	28.71	0	75
12	2017	3	2017-03-12	29.13	0	76
13	2017	3	2017-03-13	29.48	0	70
14	2017	3	2017-03-14	29.34	0	67
15	2017	3	2017-03-15	29.06	0	69
16	2017	3	2017-03-16	28.71	0	75
17	2017	3	2017-03-17	29.2	0.8	84
18	2017	3	2017-03-18	29.69	3.5	89
19	2017	3	2017-03-19	28.92	0	69
20	2017	3	2017-03-20	28.74	1.3	64
21	2017	3	2017-03-21	28.22	0	63
22	2017	3	2017-03-22	29.59	0	65
23	2017	3	2017-03-23	27.11	0	89
24	2017	3	2017-03-24	27.34	0	68.25
25	2017	3	2017-03-25	27.38	0	74.13
26	2017	3	2017-03-26	26.98	1.25	75.06
27	2017	3	2017-03-27	27.43	0.25	71.63
28	2017	3	2017-03-28	27.68	1.5	69.81
29	2017	3	2017-03-29	26.95	0.45	75.94
30	2017	3	2017-03-30	26.47	0.2	74.5
31	2017	3	2017-03-31	26.37	0.28	72.5
1	2017	4	2017-04-01	26.08	0	75.38
2	2017	4	2017-04-02	26.21	0	70.44
3	2017	4	2017-04-03	26.63	0	70.75
4	2017	4	2017-04-04	26.63	0	73
5	2017	4	2017-04-05	27.15	1.5	70.5
6	2017	4	2017-04-06	27.56	0	67.81
7	2017	4	2017-04-07	27.27	0	69.56
8	2017	4	2017-04-08	26.59	0.25	72.88
9	2017	4	2017-04-09	26.75	0.73	72.75
10	2017	4	2017-04-10	26.26	5.13	77.38
11	2017	4	2017-04-11	25.94	1.25	76.19
12	2017	4	2017-04-12	26.54	0	69.19
13	2017	4	2017-04-13	26.44	0.13	70.56
14	2017	4	2017-04-14	26.88	0.25	71
15	2017	4	2017-04-15	25.62	3	82.81
16	2017	4	2017-04-16	25.75	1.65	76.5
17	2017	4	2017-04-17	26.3	0	72.44
18	2017	4	2017-04-18	25.78	0.23	81.5
19	2017	4	2017-04-19	25.93	1.25	82.06
20	2017	4	2017-04-20	25.66	2.33	80.38
21	2017	4	2017-04-21	25.38	5.05	73.94
22	2017	4	2017-04-22	25.54	2.53	74.13
23	2017	4	2017-04-23	25.57	1.23	76.19
24	2017	4	2017-04-24	25.79	3.55	81.25
25	2017	4	2017-04-25	25.66	3.5	79.31
26	2017	4	2017-04-26	25.19	1.35	82
27	2017	4	2017-04-27	24.22	2.38	85.44
28	2017	4	2017-04-28	24.96	0.98	79.06
29	2017	4	2017-04-29	24.37	3.48	82.94
30	2017	4	2017-04-30	24.72	1.43	83.38
1	2017	5	2017-05-01	24.59	0.68	83.88
2	2017	5	2017-05-02	24.76	0.93	84.63
3	2017	5	2017-05-03	24.33	0.25	82.94
4	2017	5	2017-05-04	23.94	3.35	82.63
5	2017	5	2017-05-05	24.63	2.88	82.69
6	2017	5	2017-05-06	24.83	0.55	80.56
7	2017	5	2017-05-07	25.08	2.2	81.94
8	2017	5	2017-05-08	24.87	0.98	83
9	2017	5	2017-05-09	24.73	0.03	81.81
10	2017	5	2017-05-10	24.42	2.65	79.81
11	2017	5	2017-05-11	23.5	1.13	86.5
12	2017	5	2017-05-12	23.98	4.4	85.13
13	2017	5	2017-05-13	23.84	0.28	85.25
14	2017	5	2017-05-14	24.35	1.25	80.44
15	2017	5	2017-05-15	23.58	11.1	88.69
16	2017	5	2017-05-16	23.17	23.03	91.38
17	2017	5	2017-05-17	23.92	10.1	88.06
18	2017	5	2017-05-18	23.74	4.55	85.94
19	2017	5	2017-05-19	23.29	2.53	87.88
20	2017	5	2017-05-20	23.23	1.13	82
21	2017	5	2017-05-21	23.37	1	86.81
22	2017	5	2017-05-22	24.14	3.98	80.5
23	2017	5	2017-05-23	24.37	0.8	85.28
24	2017	5	2017-05-24	24.83	0.35	80.5
25	2017	5	2017-05-25	24.61	0.55	82
26	2017	5	2017-05-26	23.83	2.45	92.19
27	2017	5	2017-05-27	23.27	6.8	86.88
28	2017	5	2017-05-28	23.58	0.25	86.69
29	2017	5	2017-05-29	24.29	0	81.88
30	2017	5	2017-05-30	24.21	0.3	81.44
31	2017	5	2017-05-31	23.84	0.93	85
1	2017	6	2017-06-01	23.81	1.08	86.81
2	2017	6	2017-06-02	23.99	2.1	85.75
3	2017	6	2017-06-03	24.49	0.25	83.69
4	2017	6	2017-06-04	24.12	2.83	82.81
5	2017	6	2017-06-05	23.86	9.5	85.69
6	2017	6	2017-06-06	23.6	2.68	86.94
7	2017	6	2017-06-07	23.36	8.58	81.88
8	2017	6	2017-06-08	23.42	1.25	88.5
9	2017	6	2017-06-09	23.48	2.08	85.13
10	2017	6	2017-06-10	24.15	2.63	83.13
11	2017	6	2017-06-11	23.64	2.2	84.31
12	2017	6	2017-06-12	23.86	1.83	82.75
13	2017	6	2017-06-13	23.86	2.08	83.75
14	2017	6	2017-06-14	23.37	2.1	85.06
15	2017	6	2017-06-15	22.81	0.97	85.06
16	2017	6	2017-06-16	22.77	1.22	82.44
17	2017	6	2017-06-17	22.09	1.35	84.06
18	2017	6	2017-06-18	22.95	1.9	84.63
19	2017	6	2017-06-19	22.86	1.5	85.5
20	2017	6	2017-06-20	22.43	2.35	86.81
21	2017	6	2017-06-21	22.7	3	85.25
22	2017	6	2017-06-22	22.53	1.75	89.75
23	2017	6	2017-06-23	22.08	2.93	90.06
24	2017	6	2017-06-24	22.19	2.3	87.31
25	2017	6	2017-06-25	21.87	0.7	87
26	2017	6	2017-06-26	21.87	1.75	84.31
27	2017	6	2017-06-27	21.51	3.9	89.94
28	2017	6	2017-06-28	22.39	6.35	85.13
29	2017	6	2017-06-29	22.47	2.38	87.44
30	2017	6	2017-06-30	22.81	1.6	88.88
1	2017	7	2017-07-01	22.64	0.45	84.25
2	2017	7	2017-07-02	22.51	1.2	79.19
3	2017	7	2017-07-03	22.28	0.13	82.94
4	2017	7	2017-07-04	22.93	1.18	85.06
5	2017	7	2017-07-05	22.68	0.58	85.19
6	2017	7	2017-07-06	22.29	4.75	87.5
7	2017	7	2017-07-07	22.22	6.2	91.19
8	2017	7	2017-07-08	23.94	6.9	89.57
9	2017	7	2017-07-09	23.39	1.05	88.38
10	2017	7	2017-07-10	22.4	3.2	85.44
11	2017	7	2017-07-11	22.35	1.2	84.19
12	2017	7	2017-07-12	22.02	2.9	84.38
13	2017	7	2017-07-13	22.18	1.55	88.19
14	2017	7	2017-07-14	22.31	2.38	87.38
15	2017	7	2017-07-15	22.6	2.9	85.19
16	2017	7	2017-07-16	22.24	3.05	86.75
17	2017	7	2017-07-17	22.64	1.8	82.44
18	2017	7	2017-07-18	22.24	0.88	81.81
19	2017	7	2017-07-19	21.81	0.63	83.94
20	2017	7	2017-07-20	22.65	0.63	81.81
21	2017	7	2017-07-21	22.23	0.25	81.38
22	2017	7	2017-07-22	21.64	7.25	84.25
23	2017	7	2017-07-23	22.4	5.93	87.25
24	2017	7	2017-07-24	22.36	3.83	87.91
25	2017	7	2017-07-25	22.17	0.65	89.25
26	2017	7	2017-07-26	22.01	3.1	86.25
27	2017	7	2017-07-27	21.9	5.2	87.31
28	2017	7	2017-07-28	22.46	3.45	85.63
29	2017	7	2017-07-29	21.81	0.18	84.13
30	2017	7	2017-07-30	21.53	1.6	86.63
31	2017	7	2017-07-31	21.39	6.88	85.5
1	2017	8	2017-08-01	21.71	2.95	88.69
2	2017	8	2017-08-02	22.12	3.63	83
3	2017	8	2017-08-03	21.5	0.68	78.75
4	2017	8	2017-08-04	21.25	0.45	80.13
5	2017	8	2017-08-05	22.27	0	87.13
6	2017	8	2017-08-06	22.34	1.08	84
7	2017	8	2017-08-07	21.44	4.18	81.88
8	2017	8	2017-08-08	21.51	0.7	86.41
9	2017	8	2017-08-09	21.79	0.28	84.94
10	2017	8	2017-08-10	21.67	0.88	85.31
11	2017	8	2017-08-11	21.49	0.35	80.69
12	2017	8	2017-08-12	22.32	0	81.38
13	2017	8	2017-08-13	21.78	0.8	82.94
14	2017	8	2017-08-14	22.43	0.58	83.56
15	2017	8	2017-08-15	22.81	2.45	82.43
16	2017	8	2017-08-16	22.67	0.8	84.31
17	2017	8	2017-08-17	22.24	1.25	84.19
18	2017	8	2017-08-18	22.27	1.45	82.88
19	2017	8	2017-08-19	22.39	1.48	79.88
20	2017	8	2017-08-20	22.27	0.15	85.88
21	2017	8	2017-08-21	22.44	0.63	80.44
22	2017	8	2017-08-22	21.94	0.1	79.81
23	2017	8	2017-08-23	22.11	0.58	77.25
24	2017	8	2017-08-24	22.21	1.53	82.63
25	2017	8	2017-08-25	22.25	5.25	84.06
26	2017	8	2017-08-26	23.11	0	84.94
27	2017	8	2017-08-27	22.87	0	81.44
28	2017	8	2017-08-28	23.44	0	78
29	2017	8	2017-08-29	23.28	0	84.31
30	2017	8	2017-08-30	22.64	0.1	86.81
31	2017	8	2017-08-31	22.82	6.35	83.56
1	2017	9	2017-09-01	22.79	0.55	81.13
2	2017	9	2017-09-02	22.52	0	80.25
3	2017	9	2017-09-03	22.7	0.5	84.13
4	2017	9	2017-09-04	23.23	2.38	85.94
5	2017	9	2017-09-05	23.81	2.25	86.88
6	2017	9	2017-09-06	22.32	2.48	83.38
7	2017	9	2017-09-07	22.33	1.2	79.81
8	2017	9	2017-09-08	22.9	1.45	79
9	2017	9	2017-09-09	22.47	1.03	80.06
10	2017	9	2017-09-10	22.55	2.18	82.75
11	2017	9	2017-09-11	22.51	0.8	81.5
12	2017	9	2017-09-12	22.67	0.98	80.81
13	2017	9	2017-09-13	23.56	0.43	74.63
14	2017	9	2017-09-14	24.03	1.2	79.19
15	2017	9	2017-09-15	23.98	1.08	75.75
16	2017	9	2017-09-16	23.38	0	79
17	2017	9	2017-09-17	25.06	0.55	75.5
18	2017	9	2017-09-18	23.59	0.2	76.31
19	2017	9	2017-09-19	23.86	0.95	82.92
20	2017	9	2017-09-20	24.49	1.9	81.75
21	2017	9	2017-09-21	24.42	1.9	79.25
22	2017	9	2017-09-22	24.05	0	80.5
23	2017	9	2017-09-23	23.93	0.13	80.63
24	2017	9	2017-09-24	24.34	1.35	80.63
25	2017	9	2017-09-25	24.14	0.15	80.69
26	2017	9	2017-09-26	24.35	0	80.06
27	2017	9	2017-09-27	23.88	0.1	78.75
28	2017	9	2017-09-28	24.34	0.65	78.19
29	2017	9	2017-09-29	24.73	0.75	80.56
30	2017	9	2017-09-30	25.12	0.95	71
1	2017	10	2017-10-01	24.78	0	76.38
2	2017	10	2017-10-02	25.14	0	72.56
3	2017	10	2017-10-03	24.46	0.15	78.94
4	2017	10	2017-10-04	24.18	6.9	77.63
5	2017	10	2017-10-05	25.16	2.6	77.06
6	2017	10	2017-10-06	25.12	0.65	77.69
7	2017	10	2017-10-07	24.75	1.1	78.38
8	2017	10	2017-10-08	24.65	0.65	76.75
9	2017	10	2017-10-09	23.58	0.43	84.19
10	2017	10	2017-10-10	23.39	9.83	82.44
11	2017	10	2017-10-11	23.49	4.6	80.25
12	2017	10	2017-10-12	23.86	0.55	79.5
13	2017	10	2017-10-13	24.08	1.25	77.5
14	2017	10	2017-10-14	24.53	0.1	78.13
15	2017	10	2017-10-15	24.56	2.4	75.25
16	2017	10	2017-10-16	24.46	0	77.25
17	2017	10	2017-10-17	24.76	1.53	77.25
18	2017	10	2017-10-18	25.21	0.35	73.13
19	2017	10	2017-10-19	25.07	0	73.44
20	2017	10	2017-10-20	25.29	0	71.25
21	2017	10	2017-10-21	25.53	0	72
22	2017	10	2017-10-22	25.13	1.35	75.81
23	2017	10	2017-10-23	24.99	0	76.25
24	2017	10	2017-10-24	24.68	0.15	76.17
25	2017	10	2017-10-25	25.21	0	74.81
26	2017	10	2017-10-26	25.29	0	70.44
27	2017	10	2017-10-27	25.37	0	69.88
28	2017	10	2017-10-28	25.64	0	65.56
29	2017	10	2017-10-29	26.22	0	70.81
30	2017	10	2017-10-30	26.03	0.3	77.75
31	2017	10	2017-10-31	25.58	2.8	76.06
1	2017	11	2017-11-01	25.79	0	75.13
2	2017	11	2017-11-02	25.79	0.05	81.75
3	2017	11	2017-11-03	24.34	2.4	77.92
4	2017	11	2017-11-04	24.55	0	77.5
5	2017	11	2017-11-05	25.2	4.73	75.5
6	2017	11	2017-11-06	25.3	0	73.08
7	2017	11	2017-11-07	25.06	0	73.5
8	2017	11	2017-11-08	25.28	0	71
9	2017	11	2017-11-09	25.67	1.37	69.58
10	2017	11	2017-11-10	26.16	0	66.25
11	2017	11	2017-11-11	26.13	0	72.58
12	2017	11	2017-11-12	26.76	0	66
13	2017	11	2017-11-13	26.58	0	69.5
14	2017	11	2017-11-14	26.27	0	69.58
15	2017	11	2017-11-15	26.64	0	70.42
16	2017	11	2017-11-16	25.79	1.2	76.08
17	2017	11	2017-11-17	25.1	0.33	72.17
18	2017	11	2017-11-18	24.59	0.7	74.42
19	2017	11	2017-11-19	24.94	0.1	78.58
20	2017	11	2017-11-20	24.77	6.03	75.58
21	2017	11	2017-11-21	25.07	0.73	71.42
22	2017	11	2017-11-22	25.77	5	74.67
23	2017	11	2017-11-23	25.84	0.67	68
24	2017	11	2017-11-24	26.81	0	66.42
25	2017	11	2017-11-25	27.43	0	69.75
26	2017	11	2017-11-26	27.15	0	72.75
27	2017	11	2017-11-27	26.02	0.03	79.17
28	2017	11	2017-11-28	26.32	0.03	76.08
29	2017	11	2017-11-29	26.07	5.63	73.67
30	2017	11	2017-11-30	25.65	0.1	71.08
1	2017	12	2017-12-01	26.32	0	76.75
2	2017	12	2017-12-02	25.97	0	73.75
3	2017	12	2017-12-03	26.38	0	73.19
4	2017	12	2017-12-04	27	0	70.31
5	2017	12	2017-12-05	27.15	0	73.19
6	2017	12	2017-12-06	27.08	0	72.94
7	2017	12	2017-12-07	27.1	0.1	74.88
8	2017	12	2017-12-08	27.3	1.35	72.63
9	2017	12	2017-12-09	26.69	0	72.06
10	2017	12	2017-12-10	26.85	0	71.13
11	2017	12	2017-12-11	26.38	0.65	76.56
12	2017	12	2017-12-12	26.35	9.2	74.69
13	2017	12	2017-12-13	27.52	0	75.19
14	2017	12	2017-12-14	26.29	3.7	68.75
15	2017	12	2017-12-15	26	0	71.13
16	2017	12	2017-12-16	26.68	0	68.75
17	2017	12	2017-12-17	25.76	10.18	80.44
18	2017	12	2017-12-18	25.71	7.6	80.08
19	2017	12	2017-12-19	26.22	0.85	81.42
20	2017	12	2017-12-20	28.22	1	76.19
21	2017	12	2017-12-21	26.07	5.9	78
22	2017	12	2017-12-22	25.92	2.1	79
23	2017	12	2017-12-23	26.14	1.83	77.06
24	2017	12	2017-12-24	26.66	0	73.19
25	2017	12	2017-12-25	26.51	0.63	72.5
26	2017	12	2017-12-26	25.66	1.13	63.94
27	2017	12	2017-12-27	24.97	0	71.06
28	2017	12	2017-12-28	23.7	0	71.75
29	2017	12	2017-12-29	24.69	0	69.19
30	2017	12	2017-12-30	25.24	0	68.19
31	2017	12	2017-12-31	25.16	0	67.19
1	2018	1	2018-01-01	27.124	0	66.1
2	2018	1	2018-01-02	27.3431	0.52	67.05
3	2018	1	2018-01-03	26.9598	0	68.3
4	2018	1	2018-01-04	26.46	0	67.8
5	2018	1	2018-01-05	26.9952	0	71.15
6	2018	1	2018-01-06	26.2561	1.32	72.85
7	2018	1	2018-01-07	26.5488	10.44	72.25
8	2018	1	2018-01-08	26.2047	0.22	74.75
9	2018	1	2018-01-09	26.2044	7.18	72.25
10	2018	1	2018-01-10	26.3397	2.04	75.35
11	2018	1	2018-01-11	27.0235	0.56	77.1
12	2018	1	2018-01-12	27.2237	1.22	74.8
13	2018	1	2018-01-13	26.4393	0.76	78.85
14	2018	1	2018-01-14	26.9849	0	72.8
15	2018	1	2018-01-15	26.8877	0.86	73.15
16	2018	1	2018-01-16	26.8658	0	75.6
17	2018	1	2018-01-17	26.7865	0	77.5
18	2018	1	2018-01-18	26.7213	6.4	74.6
19	2018	1	2018-01-19	27.0123	2.92	74.65
20	2018	1	2018-01-20	26.9683	2.28	75.75
21	2018	1	2018-01-21	26.8051	0.14	77.25
22	2018	1	2018-01-22	26.1878	8.76	82.1
23	2018	1	2018-01-23	26.5932	5.32	78.1
24	2018	1	2018-01-24	26.5478	14.26	76.45
25	2018	1	2018-01-25	27.0285	0.64	70.8
26	2018	1	2018-01-26	27.2022	10.56	69.65
27	2018	1	2018-01-27	26.8201	0	70.75
28	2018	1	2018-01-28	26.6094	0	72.65
29	2018	1	2018-01-29	26.6517	1.98	72.9
30	2018	1	2018-01-30	26.5399	0	72.8
31	2018	1	2018-01-31	26.3902	1.2	75.35
1	2018	2	2018-02-01	26.7789	0	70.1
2	2018	2	2018-02-02	26.4335	0.06	76.85
3	2018	2	2018-02-03	26.669	0	72.25
4	2018	2	2018-02-04	26.7205	0.4	78.9
5	2018	2	2018-02-05	26.7116	0.52	77.25
6	2018	2	2018-02-06	26.9745	1.22	70.85
7	2018	2	2018-02-07	26.8249	0.36	69.8
8	2018	2	2018-02-08	26.133	0	75.4
9	2018	2	2018-02-09	26.3515	0.76	73.6
10	2018	2	2018-02-10	26.5683	0.72	78.4
11	2018	2	2018-02-11	26.4202	0	70.55
12	2018	2	2018-02-12	26.6418	0	72.35
13	2018	2	2018-02-13	27.0376	0	74.3
14	2018	2	2018-02-14	27.1656	0	69.4
15	2018	2	2018-02-15	27.2856	0	76.45
16	2018	2	2018-02-16	27.6124	0	74.4
17	2018	2	2018-02-17	27.0561	0	68.55
18	2018	2	2018-02-18	27.0268	0	68.45
19	2018	2	2018-02-19	26.5086	0.2	71.81
20	2018	2	2018-02-20	26.1251	0	76.21
21	2018	2	2018-02-21	26.1625	1.04	81.8
22	2018	2	2018-02-22	26.35	0.82	76.6
23	2018	2	2018-02-23	25.9192	5.6	73.9
24	2018	2	2018-02-24	25.9611	3.8	79.9
25	2018	2	2018-02-25	26.6047	1.84	77.1
26	2018	2	2018-02-26	26.6494	0.8	77.95
27	2018	2	2018-02-27	27.0814	0.24	71.65
28	2018	2	2018-02-28	26.4923	0.62	75.65
1	2018	3	2018-03-01	26.6138	0	75
2	2018	3	2018-03-02	26.8385	0.36	71.35
3	2018	3	2018-03-03	26.5281	1.8	66.15
4	2018	3	2018-03-04	26.7843	0.04	68.85
5	2018	3	2018-03-05	26.6789	0.24	70.55
6	2018	3	2018-03-06	27.0335	2.04	68.75
7	2018	3	2018-03-07	27.0443	0.28	72.45
8	2018	3	2018-03-08	27.0116	0	70.15
9	2018	3	2018-03-09	26.9799	0	71.1
10	2018	3	2018-03-10	27.3489	0	69.45
11	2018	3	2018-03-11	27.4263	0	68.9
12	2018	3	2018-03-12	27.3001	0.2	69.7
13	2018	3	2018-03-13	27.3843	0	68.8
14	2018	3	2018-03-14	26.8891	0	69.5
15	2018	3	2018-03-15	26.2785	0	73.85
16	2018	3	2018-03-16	25.8023	0.72	77.15
17	2018	3	2018-03-17	26.8338	0.28	76.75
18	2018	3	2018-03-18	26.7173	0.52	76.35
19	2018	3	2018-03-19	26.6512	1.66	72.55
20	2018	3	2018-03-20	26.9491	0	71.4
21	2018	3	2018-03-21	26.6228	0.26	72.1
22	2018	3	2018-03-22	27.3848	0	74
23	2018	3	2018-03-23	27.105	0.8	76.35
24	2018	3	2018-03-24	27.34	0	68.25
25	2018	3	2018-03-25	27.375	0	74.125
26	2018	3	2018-03-26	26.98	0	75.0625
27	2018	3	2018-03-27	27.425	1.25	71.625
28	2018	3	2018-03-28	27.68	0.25	69.8125
29	2018	3	2018-03-29	26.95	1.5	75.9375
30	2018	3	2018-03-30	26.47	0.45	74.5
31	2018	3	2018-03-31	26.365	0.2	72.5
1	2018	4	2018-04-01	26.08	0.275	75.375
2	2018	4	2018-04-02	26.205	0	70.4375
3	2018	4	2018-04-03	26.625	0	70.75
4	2018	4	2018-04-04	26.625	0	73
5	2018	4	2018-04-05	27.15	0	70.5
6	2018	4	2018-04-06	27.56	1.5	67.8125
7	2018	4	2018-04-07	27.27	0	69.5625
8	2018	4	2018-04-08	26.59	0	72.875
9	2018	4	2018-04-09	26.75	0.25	72.75
10	2018	4	2018-04-10	26.26	0.725	77.375
11	2018	4	2018-04-11	25.935	5.125	76.1875
12	2018	4	2018-04-12	26.535	1.25	69.1875
13	2018	4	2018-04-13	26.44	0	70.5625
14	2018	4	2018-04-14	26.875	0.125	71
15	2018	4	2018-04-15	25.615	0.25	82.8125
16	2018	4	2018-04-16	25.745	3	76.5
17	2018	4	2018-04-17	26.295	1.65	72.4375
18	2018	4	2018-04-18	25.775	0	81.5
19	2018	4	2018-04-19	25.925	0.225	82.0625
20	2018	4	2018-04-20	25.655	1.25	80.375
21	2018	4	2018-04-21	25.38	2.325	73.9375
22	2018	4	2018-04-22	25.54	5.05	74.125
23	2018	4	2018-04-23	25.565	2.525	76.1875
24	2018	4	2018-04-24	25.79	1.225	81.25
25	2018	4	2018-04-25	25.655	3.55	79.3125
26	2018	4	2018-04-26	25.185	3.5	82
27	2018	4	2018-04-27	24.22	1.35	85.4375
28	2018	4	2018-04-28	24.96	2.375	79.0625
29	2018	4	2018-04-29	24.365	0.975	82.9375
30	2018	4	2018-04-30	24.715	3.475	83.375
1	2018	5	2018-05-01	24.585	1.425	83.875
2	2018	5	2018-05-02	24.755	0.675	84.625
3	2018	5	2018-05-03	24.33	0.925	82.9375
4	2018	5	2018-05-04	23.94	0.25	82.625
5	2018	5	2018-05-05	24.625	3.35	82.6875
6	2018	5	2018-05-06	24.825	2.875	80.5625
7	2018	5	2018-05-07	25.075	0.55	81.9375
8	2018	5	2018-05-08	24.865	2.2	83
9	2018	5	2018-05-09	24.725	0.975	81.8125
10	2018	5	2018-05-10	24.415	0.025	79.8125
11	2018	5	2018-05-11	23.5	2.65	86.5
12	2018	5	2018-05-12	23.98	1.125	85.125
13	2018	5	2018-05-13	23.84	4.4	85.25
14	2018	5	2018-05-14	24.345	0.275	80.4375
15	2018	5	2018-05-15	23.575	1.25	88.6875
16	2018	5	2018-05-16	23.17	11.1	91.375
17	2018	5	2018-05-17	23.915	23.025	88.0625
18	2018	5	2018-05-18	23.74	10.1	85.9375
19	2018	5	2018-05-19	23.29	4.55	87.875
20	2018	5	2018-05-20	23.23	2.525	82
21	2018	5	2018-05-21	23.37	1.125	86.8125
22	2018	5	2018-05-22	24.135	1	80.5
23	2018	5	2018-05-23	24.37	3.975	85.275
24	2018	5	2018-05-24	24.83	0.8	80.5
25	2018	5	2018-05-25	24.605	0.35	82
26	2018	5	2018-05-26	23.83	0.55	92.1875
27	2018	5	2018-05-27	23.265	2.45	86.875
28	2018	5	2018-05-28	23.58	6.8	86.6875
29	2018	5	2018-05-29	24.285	0.25	81.875
30	2018	5	2018-05-30	24.21	0	81.4375
31	2018	5	2018-05-31	23.84	0.3	85
1	2018	6	2018-06-01	23.805	0.925	86.8125
2	2018	6	2018-06-02	23.985	1.075	85.75
3	2018	6	2018-06-03	24.49	2.1	83.6875
4	2018	6	2018-06-04	24.115	0.25	82.8125
5	2018	6	2018-06-05	23.855	2.825	85.6875
6	2018	6	2018-06-06	23.595	9.5	86.9375
7	2018	6	2018-06-07	23.36	2.675	81.875
8	2018	6	2018-06-08	23.415	8.575	88.5
9	2018	6	2018-06-09	23.48	1.25	85.125
10	2018	6	2018-06-10	24.15	2.075	83.125
11	2018	6	2018-06-11	23.64	2.625	84.3125
12	2018	6	2018-06-12	23.86	2.2	82.75
13	2018	6	2018-06-13	23.86	1.825	83.75
14	2018	6	2018-06-14	23.37	2.075	85.0625
15	2018	6	2018-06-15	22.805	2.1	85.0625
16	2018	6	2018-06-16	22.765	0.9725	82.4375
17	2018	6	2018-06-17	22.085	1.22025	84.0625
18	2018	6	2018-06-18	22.95	1.3475	84.625
19	2018	6	2018-06-19	22.86	1.9	85.5
20	2018	6	2018-06-20	22.43	1.5	86.8125
21	2018	6	2018-06-21	22.7	2.35	85.25
22	2018	6	2018-06-22	22.53	3	89.75
[truncated: 8,223 more rows]
