# Supplementary material for: Epidemiological and ecological determinants of Zika virus transmission in an urban setting
Source: eLife journal article supplement (doi:10.7554/elife.29820), 2017-09-05
Supplement: supp [file elife-29820-supp-v1.zip › elife_poa_e29820_Dataset_2.xls]

## Sheet: Sheet1
Age group	Population	Males	Females	FM	cases2015	cases2016
<1	8562	4255	4307	1.01222	48	17
1-4	32402	16459	15943	0.968649	134	17
5-9	44522	2273	21792	9.58733	150	15
10-14	48874	24696	24178	0.979025	148	13
15-19	50211	24787	25424	1.0257	113	20
20-34	143607	78.087	85593	1096.12	415	86
35-49	114047	36838	61342	1.66518	318	47
50-64	61435	27367	34068	1.24486	163	20
65-79	25975	10558	15417	1.46022	39	5
80+	6934	2355	4579	1.94437	7	1
