# Supplementary material for: Epidemiological and ecological determinants of Zika virus transmission in an urban setting
Source: eLife journal article supplement (doi:10.7554/elife.29820), 2017-09-05
Supplement: supp [file elife-29820-supp-v1.zip › elife_poa_e29820_Dataset_3.xls]

## Sheet: CREATOR_FSA_newdata_incZikaV_FI
cases	day	week	month	year	cases_cm	epidate
1	1	5	2	2015	1	2015-02-01
0	8	6	2	2015	1	2015-02-08
0	15	7	2	2015	1	2015-02-15
0	22	8	2	2015	1	2015-02-22
1	1	9	3	2015	2	2015-03-01
1	8	10	3	2015	3	2015-03-08
1	15	11	3	2015	4	2015-03-15
3	22	12	3	2015	7	2015-03-22
3	29	13	3	2015	10	2015-03-29
17	5	14	4	2015	27	2015-04-05
30	12	15	4	2015	57	2015-04-12
17	19	16	4	2015	74	2015-04-19
31	26	17	4	2015	105	2015-04-26
64	3	18	5	2015	169	2015-05-03
83	10	19	5	2015	252	2015-05-10
95	17	20	5	2015	347	2015-05-17
91	24	21	5	2015	438	2015-05-24
92	31	22	5	2015	530	2015-05-31
102	7	23	6	2015	632	2015-06-07
99	14	24	6	2015	731	2015-06-14
94	21	25	6	2015	825	2015-06-21
99	28	26	6	2015	924	2015-06-28
133	5	27	7	2015	1057	2015-07-05
139	12	28	7	2015	1196	2015-07-12
73	19	29	7	2015	1269	2015-07-19
61	26	30	7	2015	1330	2015-07-26
45	2	31	8	2015	1375	2015-08-02
33	9	32	8	2015	1408	2015-08-09
19	16	33	8	2015	1427	2015-08-16
21	23	34	8	2015	1448	2015-08-23
10	30	35	8	2015	1458	2015-08-30
9	6	36	9	2015	1467	2015-09-06
5	13	37	9	2015	1472	2015-09-13
4	20	38	9	2015	1476	2015-09-20
7	27	39	9	2015	1483	2015-09-27
2	4	40	10	2015	1485	2015-10-04
5	11	41	10	2015	1490	2015-10-11
1	18	42	10	2015	1491	2015-10-18
1	25	43	10	2015	1492	2015-10-25
0	1	44	11	2015	1492	2015-11-01
6	8	45	11	2015	1498	2015-11-08
1	15	46	11	2015	1499	2015-11-15
8	22	47	11	2015	1507	2015-11-22
10	29	48	11	2015	1517	2015-11-29
6	6	49	12	2015	1523	2015-12-06
10	13	50	12	2015	1533	2015-12-13
10	20	51	12	2015	1543	2015-12-20
4	27	52	12	2015	1547	2015-12-27
5	3	1	1	2016	1552	2016-01-03
2	10	2	1	2016	1554	2016-01-10
3	17	3	1	2016	1557	2016-01-17
5	24	4	1	2016	1562	2016-01-24
9	31	5	1	2016	1571	2016-01-31
7	7	6	2	2016	1578	2016-02-07
21	14	7	2	2016	1599	2016-02-14
21	21	8	2	2016	1620	2016-02-21
20	28	9	2	2016	1640	2016-02-28
11	6	10	3	2016	1651	2016-03-06
21	13	11	3	2016	1672	2016-03-13
15	20	12	3	2016	1687	2016-03-20
18	27	13	3	2016	1705	2016-03-27
14	3	14	4	2016	1719	2016-04-03
11	10	15	4	2016	1730	2016-04-10
6	17	16	4	2016	1736	2016-04-17
5	24	17	4	2016	1741	2016-04-24
5	1	18	5	2016	1746	2016-05-01
7	8	19	5	2016	1753	2016-05-08
4	15	20	5	2016	1757	2016-05-15
9	22	21	5	2016	1766	2016-05-22
6	29	22	5	2016	1772	2016-05-29
4	5	23	6	2016	1776	2016-06-05
8	12	24	6	2016	1784	2016-06-12
4	19	25	6	2016	1788	2016-06-19
4	26	26	6	2016	1792	2016-06-26
0	3	27	7	2016	1792	2016-07-03
2	10	28	7	2016	1794	2016-07-10
6	17	29	7	2016	1800	2016-07-17
1	24	30	7	2016	1801	2016-07-24
3	31	31	7	2016	1804	2016-07-31
3	7	32	8	2016	1807	2016-08-07
5	14	33	8	2016	1812	2016-08-14
3	21	34	8	2016	1815	2016-08-21
0	28	35	8	2016	1815	2016-08-28
5	4	36	9	2016	1820	2016-09-04
1	11	37	9	2016	1821	2016-09-11
1	18	38	9	2016	1822	2016-09-18
4	25	39	9	2016	1826	2016-09-25
4	2	40	10	2016	1830	2016-10-02
7	9	41	10	2016	1837	2016-10-09
4	16	42	10	2016	1841	2016-10-16
12	23	43	10	2016	1853	2016-10-23
5	30	44	10	2016	1858	2016-10-30
5	6	45	11	2016	1863	2016-11-06
2	13	46	11	2016	1865	2016-11-13
5	20	47	11	2016	1870	2016-11-20
9	27	48	11	2016	1879	2016-11-27
8	4	49	12	2016	1887	2016-12-04
9	11	50	12	2016	1896	2016-12-11
9	18	51	12	2016	1905	2016-12-18
13	25	52	12	2016	1918	2016-12-25
4	1	1	1	2017	1922	2017-01-01
11	8	2	1	2017	1933	2017-01-08
3	15	3	1	2017	1936	2017-01-15
0	22	4	1	2017	1936	2017-01-22
4	29	5	1	2017	1940	2017-01-29
6	5	6	2	2017	1946	2017-02-05
0	12	7	2	2017	1946	2017-02-12
0	19	8	2	2017	1946	2017-02-19
0	26	9	2	2017	1946	2017-02-26
0	5	10	3	2017	1946	2017-03-05
0	12	11	3	2017	1946	2017-03-12
0	19	12	3	2017	1946	2017-03-19
0	26	13	3	2017	1946	2017-03-26
0	2	14	4	2017	1946	2017-04-02
0	9	15	4	2017	1946	2017-04-09
0	16	16	4	2017	1946	2017-04-16
0	23	17	4	2017	1946	2017-04-23
0	30	18	4	2017	1946	2017-04-30
