# Supplementary material for: Epidemiological and ecological determinants of Zika virus transmission in an urban setting
Source: eLife journal article supplement (doi:10.7554/elife.29820), 2017-09-05
Supplement: supp [file elife-29820-supp-v1.zip › elife_poa_e29820_Dataset_4.xls]

## Sheet: Microcephaly_dataseries_2015_20
date	week	cp_cm	status	count		date	week	cp_cm	status	count
2016-01-07	01/2016	31 cm	confirmed	1		2015-01-05	01/2015	32 cm	suspected/rejected	1
2016-01-10	02/2016	28 cm	confirmed	1		2016-01-04	01/2016	32 cm	suspected/rejected	1
2016-01-25	04/2016	30 cm	confirmed	1		2016-01-02	01/2016	32 cm	suspected/rejected	1
2016-01-30	04/2016	29 cm	confirmed	1		2016-01-15	02/2016	31 cm	suspected/rejected	1
2016-02-02	05/2016	29 cm	confirmed	1		2016-02-02	05/2016	31 cm	suspected/rejected	1
2016-02-05	05/2016	28 cm	confirmed	1		2016-02-05	05/2016	31 cm	suspected/rejected	1
2016-02-26	08/2016	30 cm	confirmed	1		2016-03-20	12/2016	31 cm	suspected/rejected	1
2016-03-07	10/2016	30 cm	confirmed	1		2016-05-23	21/2016	31 cm	suspected/rejected	1
2016-03-17	11/2016	28 cm	confirmed	1		2016-10-03	40/2016	33 cm	suspected/rejected	1
2016-03-23	12/2016	30 cm	confirmed	1		2016-10-20	42/2016	31 Cm	suspected/rejected	1
2016-04-09	14/2016	27,5 cm	confirmed	1		2015-11-23	47/2015	33 cm	suspected/rejected	1
2016-06-20	25/2016	30 cm	confirmed	1		2015-11-24	47/2015	32 cm	suspected/rejected	1
2016-07-05	27/2016	31 cm	confirmed	1		2015-11-25	47/2015	33 cm	suspected/rejected	1
2016-07-29	30/2016	29 cm	confirmed	1		2015-11-25	47/2015	32 cm	suspected/rejected	1
2016-10-20	42/2016	31 cm	confirmed	1		2015-11-27	47/2015	33 cm	suspected/rejected	1
2015-11-24	47/2015	29 cm	confirmed	1		2015-12-02	48/2015	33 cm	suspected/rejected	1
2015-12-04	48/2015	28 cm	confirmed	1		2015-12-09	49/2015	32 cm	suspected/rejected	1
2015-12-16	50/2015	25 cm	confirmed	1		2015-12-11	49/2015	32 cm	suspected/rejected	1
2015-12-17	50/2015	31 cm	confirmed	1		2015-12-11	49/2015	32 cm	suspected/rejected	1
2016-12-12	50/2016	30 cm	confirmed	1		2015-12-15	50/2015	31 cm	suspected/rejected	1
2016-07-12	28/2016	27 cm	confirmed	1		2016-12-22	50/2016	34 cm	suspected/rejected	1
			Total	21		2015-12-22	51/2015	31 cm	suspected/rejected	1
						2016-12-29	52/2016	36 cm	suspected/rejected	1
date	week	cp_cm	status	count		2016-03-02	09/2016	31 cm	suspected/rejected	1
2016-05-18	20/2016	fetal death		1		2016-04-09	14/2016	30 cm	suspected/rejected	1
2016-05-21	20/2016	fetal death		1		2016-09-06	36/2016	31 cm	suspected/rejected	1
2015-12-22	51/2015	fetal death		1		2016-10-14	41/2016	30 cm	suspected/rejected	1
			Total	3		2015-11-30	48/2015	31 cm	suspected/rejected	1
									Total	28
