# Supplementary material for: Epidemiological and ecological determinants of Zika virus transmission in an urban setting
Source: eLife journal article supplement (doi:10.7554/elife.29820), 2017-09-05
Supplement: supp [file elife-29820-supp-v1.zip › elife_poa_e29820_Supplementary_File_1.csv]

header	tintro	K	eta	alpha	zeta	zetaprime	HlatP	HinfP	rho	IHintro	ts1	ts2	ts3	ts4	ts5	ts6	ts7	ts8	ts9	ts10	ts11	ts12	ts13	ts14	ts15	ts16	ts17	ts18	ts19	ts20	ts21	ts22	ts23	ts24	ts25	ts26	ts27	ts28	ts29	ts30	ts31	ts32	ts33	ts34	ts35	ts36	ts37	ts38	ts39
simsample1	-49.1	4900160	3.35839	2.80197	0.00398432	0.00398432	5.79904	5.48953	0.113306	5	0	0	0	0	0	0	0	0	0	0	0	0	0	0	0	0	0	0	0	0	0	0	0	0	0	0	0	0	0	0	0	0	0	0	0	0	0	0	0
simsample2	-49.55	4318300	3.33389	2.80804	0.00389786	0.00389786	5.74635	5.82588	0.0839898	5	0	0	0	0	0	0	0	0	0	0	0	0	0	0	0	0	0	0	0	0	0	0	0	0	0	0	0	0	0	0	0	0	0	0	0	0	0	0	0
simsample3	-50.2	4356360	3.33936	2.68315	0.00390111	0.00390111	5.72086	6.00187	0.0903269	5	0	0	0	0	0	0	0	0	0	0	0	0	0	0	0	0	0	0	0	0	0	0	0	0	0	0	0	0	0	0	0	0	0	0	0	0	0	0	0
simsample4	-49.55	4851880	3.3833	2.78982	0.00395052	0.00395052	5.86732	5.79775	0.105133	5	0	0	0	0	0	0	0	0	0	0	0	0	0	0	0	0	0	0	0	0	0	0	0	0	0	0	0	0	0	0	0	0	0	0	0	0	0	0	0
simsample5	-54.15	4825880	3.36924	2.83354	0.00404658	0.00404658	5.80459	5.56018	0.112775	5	0	0	0	0	0	0	0	0	0	0	0	0	0	0	0	0	0	0	0	0	0	0	0	0	0	0	0	0	0	0	0	0	0	0	0	0	0	0	0
simsample6	-53.3	4794220	3.38255	2.80539	0.00397457	0.00397457	5.85231	5.83005	0.109259	5	0	0	0	0	0	0	0	0	0	0	0	0	0	0	0	0	0	0	0	0	0	0	0	0	0	0	0	0	0	0	0	0	0	0	0	0	0	0	0
simsample7	-54.65	4325070	3.32342	2.79917	0.00395825	0.00395825	5.83469	5.90025	0.116224	5	0	0	0	0	0	0	0	0	0	0	0	0	0	0	0	0	0	0	0	0	0	0	0	0	0	0	0	0	0	0	0	0	0	0	0	0	0	0	0
simsample8	-55.35	4142180	3.29657	2.75754	0.00394062	0.00394062	5.9017	5.88843	0.113216	5	0	0	0	0	0	0	0	0	0	0	0	0	0	0	0	0	0	0	0	0	0	0	0	0	0	0	0	0	0	0	0	0	0	0	0	0	0	0	0
simsample9	-50.1	4351510	3.32679	2.69045	0.00388535	0.00388535	5.94592	5.95512	0.0993295	5	0	0	0	0	0	0	0	0	0	0	0	0	0	0	0	0	0	0	0	0	0	0	0	0	0	0	0	0	0	0	0	0	0	0	0	0	0	0	0
simsample10	-54.2	4486630	3.36163	2.77272	0.00392494	0.00392494	6.05473	6.16386	0.109637	5	0	0	0	0	0	0	0	0	0	0	0	0	0	0	0	0	0	0	0	0	0	0	0	0	0	0	0	0	0	0	0	0	0	0	0	0	0	0	0
simsample11	-55.05	4445330	3.35497	2.817	0.00398969	0.00398969	5.76266	6.01678	0.112865	5	0	0	0	0	0	0	0	0	0	0	0	0	0	0	0	0	0	0	0	0	0	0	0	0	0	0	0	0	0	0	0	0	0	0	0	0	0	0	0
simsample12	-52.3	4387730	3.34853	2.69719	0.00392495	0.00392495	5.75566	6.12806	0.104634	5	0	0	0	0	0	0	0	0	0	0	0	0	0	0	0	0	0	0	0	0	0	0	0	0	0	0	0	0	0	0	0	0	0	0	0	0	0	0	0
simsample13	-56.9	4811580	3.36118	2.78446	0.00408376	0.00408376	5.65303	5.51264	0.123532	5	0	0	0	0	0	0	0	0	0	0	0	0	0	0	0	0	0	0	0	0	0	0	0	0	0	0	0	0	0	0	0	0	0	0	0	0	0	0	0
simsample14	-52.6	5665070	3.43359	2.51852	0.003975	0.003975	5.90214	5.65118	0.109095	5	0	0	0	0	0	0	0	0	0	0	0	0	0	0	0	0	0	0	0	0	0	0	0	0	0	0	0	0	0	0	0	0	0	0	0	0	0	0	0
simsample15	-51.9	4750910	3.37277	2.81186	0.0039701	0.0039701	5.78162	5.73934	0.101423	5	0	0	0	0	0	0	0	0	0	0	0	0	0	0	0	0	0	0	0	0	0	0	0	0	0	0	0	0	0	0	0	0	0	0	0	0	0	0	0
simsample16	-47.55	4971250	3.39247	2.63609	0.0038431	0.0038431	6.01969	5.82499	0.0798097	5	0	0	0	0	0	0	0	0	0	0	0	0	0	0	0	0	0	0	0	0	0	0	0	0	0	0	0	0	0	0	0	0	0	0	0	0	0	0	0
simsample17	-55.95	4896310	3.38831	2.9082	0.00405219	0.00405219	5.72411	5.71045	0.123142	5	0	0	0	0	0	0	0	0	0	0	0	0	0	0	0	0	0	0	0	0	0	0	0	0	0	0	0	0	0	0	0	0	0	0	0	0	0	0	0
simsample18	-50.05	4196690	3.3182	2.80424	0.00385577	0.00385577	6.0735	6.04856	0.0931533	5	0	0	0	0	0	0	0	0	0	0	0	0	0	0	0	0	0	0	0	0	0	0	0	0	0	0	0	0	0	0	0	0	0	0	0	0	0	0	0
simsample19	-51	4400100	3.31287	2.66011	0.00394142	0.00394142	5.67412	5.6349	0.0962753	5	0	0	0	0	0	0	0	0	0	0	0	0	0	0	0	0	0	0	0	0	0	0	0	0	0	0	0	0	0	0	0	0	0	0	0	0	0	0	0
simsample20	-49.05	5084750	3.38561	2.60082	0.00388208	0.00388208	6.18056	5.81922	0.0989409	5	0	0	0	0	0	0	0	0	0	0	0	0	0	0	0	0	0	0	0	0	0	0	0	0	0	0	0	0	0	0	0	0	0	0	0	0	0	0	0
simsample21	-51.15	4419940	3.33399	2.74447	0.00390276	0.00390276	5.87894	5.83997	0.0992401	5	0	0	0	0	0	0	0	0	0	0	0	0	0	0	0	0	0	0	0	0	0	0	0	0	0	0	0	0	0	0	0	0	0	0	0	0	0	0	0
simsample22	-50.3	4389100	3.34712	2.78825	0.00391516	0.00391516	5.65736	5.92711	0.0946097	5	0	0	0	0	0	0	0	0	0	0	0	0	0	0	0	0	0	0	0	0	0	0	0	0	0	0	0	0	0	0	0	0	0	0	0	0	0	0	0
simsample23	-56.65	4447550	3.35078	2.72107	0.00396122	0.00396122	5.74095	5.99165	0.110497	5	0	0	0	0	0	0	0	0	0	0	0	0	0	0	0	0	0	0	0	0	0	0	0	0	0	0	0	0	0	0	0	0	0	0	0	0	0	0	0
simsample24	-53.45	4219950	3.32149	2.79661	0.00390596	0.00390596	6.00572	5.81773	0.0887846	5	0	0	0	0	0	0	0	0	0	0	0	0	0	0	0	0	0	0	0	0	0	0	0	0	0	0	0	0	0	0	0	0	0	0	0	0	0	0	0
simsample25	-54.65	4827900	3.35405	2.81391	0.00405626	0.00405626	5.74967	5.3987	0.117349	5	0	0	0	0	0	0	0	0	0	0	0	0	0	0	0	0	0	0	0	0	0	0	0	0	0	0	0	0	0	0	0	0	0	0	0	0	0	0	0
simsample26	-54.65	4442040	3.34012	2.73375	0.00398532	0.00398532	5.72097	5.98459	0.121004	5	0	0	0	0	0	0	0	0	0	0	0	0	0	0	0	0	0	0	0	0	0	0	0	0	0	0	0	0	0	0	0	0	0	0	0	0	0	0	0
simsample27	-56.85	5271090	3.41842	2.71532	0.00398115	0.00398115	6.14939	5.79358	0.114239	5	0	0	0	0	0	0	0	0	0	0	0	0	0	0	0	0	0	0	0	0	0	0	0	0	0	0	0	0	0	0	0	0	0	0	0	0	0	0	0
simsample28	-47.4	4458090	3.36087	2.84135	0.0038768	0.0038768	5.79608	6.06007	0.090172	5	0	0	0	0	0	0	0	0	0	0	0	0	0	0	0	0	0	0	0	0	0	0	0	0	0	0	0	0	0	0	0	0	0	0	0	0	0	0	0
simsample29	-52.25	4807340	3.34892	2.76752	0.00400665	0.00400665	5.76967	5.48763	0.117856	5	0	0	0	0	0	0	0	0	0	0	0	0	0	0	0	0	0	0	0	0	0	0	0	0	0	0	0	0	0	0	0	0	0	0	0	0	0	0	0
simsample30	-61.6	5499150	3.4181	2.52793	0.0040445	0.0040445	6.07447	5.7392	0.130717	5	0	0	0	0	0	0	0	0	0	0	0	0	0	0	0	0	0	0	0	0	0	0	0	0	0	0	0	0	0	0	0	0	0	0	0	0	0	0	0
simsample31	-52.8	5229770	3.42252	2.66288	0.00391472	0.00391472	6.09201	5.90998	0.102624	5	0	0	0	0	0	0	0	0	0	0	0	0	0	0	0	0	0	0	0	0	0	0	0	0	0	0	0	0	0	0	0	0	0	0	0	0	0	0	0
simsample32	-57.45	4704730	3.36212	2.81492	0.00401277	0.00401277	5.93539	5.56528	0.103347	5	0	0	0	0	0	0	0	0	0	0	0	0	0	0	0	0	0	0	0	0	0	0	0	0	0	0	0	0	0	0	0	0	0	0	0	0	0	0	0
simsample33	-52.1	4737210	3.34413	2.76822	0.00401374	0.00401374	5.73775	5.5251	0.117578	5	0	0	0	0	0	0	0	0	0	0	0	0	0	0	0	0	0	0	0	0	0	0	0	0	0	0	0	0	0	0	0	0	0	0	0	0	0	0	0
simsample34	-52.1	4745920	3.39817	2.82675	0.00390558	0.00390558	5.98164	5.92879	0.0874543	5	0	0	0	0	0	0	0	0	0	0	0	0	0	0	0	0	0	0	0	0	0	0	0	0	0	0	0	0	0	0	0	0	0	0	0	0	0	0	0
simsample35	-56.45	5226740	3.409	2.68062	0.00398355	0.00398355	6.12612	5.79517	0.119115	5	0	0	0	0	0	0	0	0	0	0	0	0	0	0	0	0	0	0	0	0	0	0	0	0	0	0	0	0	0	0	0	0	0	0	0	0	0	0	0
simsample36	-51.65	4862370	3.36474	2.81342	0.00405419	0.00405419	5.60166	5.56197	0.122308	5	0	0	0	0	0	0	0	0	0	0	0	0	0	0	0	0	0	0	0	0	0	0	0	0	0	0	0	0	0	0	0	0	0	0	0	0	0	0	0
simsample37	-52.15	4182510	3.29004	2.75868	0.00393385	0.00393385	5.98795	5.79217	0.109754	5	0	0	0	0	0	0	0	0	0	0	0	0	0	0	0	0	0	0	0	0	0	0	0	0	0	0	0	0	0	0	0	0	0	0	0	0	0	0	0
simsample38	-51.1	4318590	3.33344	2.76066	0.00392169	0.00392169	5.75003	5.94207	0.0966678	5	0	0	0	0	0	0	0	0	0	0	0	0	0	0	0	0	0	0	0	0	0	0	0	0	0	0	0	0	0	0	0	0	0	0	0	0	0	0	0
simsample39	-50.35	4918770	3.38018	2.82344	0.00401067	0.00401067	5.61269	5.62061	0.11187	5	0	0	0	0	0	0	0	0	0	0	0	0	0	0	0	0	0	0	0	0	0	0	0	0	0	0	0	0	0	0	0	0	0	0	0	0	0	0	0
simsample40	-51	5585650	3.42604	2.50181	0.00395068	0.00395068	5.8197	5.6471	0.104459	5	0	0	0	0	0	0	0	0	0	0	0	0	0	0	0	0	0	0	0	0	0	0	0	0	0	0	0	0	0	0	0	0	0	0	0	0	0	0	0
simsample41	-51.7	4328140	3.33967	2.78454	0.00393468	0.00393468	5.65317	5.97481	0.101667	5	0	0	0	0	0	0	0	0	0	0	0	0	0	0	0	0	0	0	0	0	0	0	0	0	0	0	0	0	0	0	0	0	0	0	0	0	0	0	0
simsample42	-51.15	4277740	3.30735	2.76672	0.00388896	0.00388896	6.13562	5.76346	0.095332	5	0	0	0	0	0	0	0	0	0	0	0	0	0	0	0	0	0	0	0	0	0	0	0	0	0	0	0	0	0	0	0	0	0	0	0	0	0	0	0
simsample43	-54.05	4372470	3.35148	2.81852	0.00393909	0.00393909	5.78756	6.04434	0.108166	5	0	0	0	0	0	0	0	0	0	0	0	0	0	0	0	0	0	0	0	0	0	0	0	0	0	0	0	0	0	0	0	0	0	0	0	0	0	0	0
simsample44	-47.95	4376850	3.32271	2.67632	0.00389475	0.00389475	5.60519	5.92284	0.101495	5	0	0	0	0	0	0	0	0	0	0	0	0	0	0	0	0	0	0	0	0	0	0	0	0	0	0	0	0	0	0	0	0	0	0	0	0	0	0	0
simsample45	-56.7	4191950	3.30578	2.77884	0.00395107	0.00395107	5.93359	5.83992	0.109606	5	0	0	0	0	0	0	0	0	0	0	0	0	0	0	0	0	0	0	0	0	0	0	0	0	0	0	0	0	0	0	0	0	0	0	0	0	0	0	0
simsample46	-55.9	4127370	3.29586	2.8247	0.00394916	0.00394916	6.04095	5.85403	0.111176	5	0	0	0	0	0	0	0	0	0	0	0	0	0	0	0	0	0	0	0	0	0	0	0	0	0	0	0	0	0	0	0	0	0	0	0	0	0	0	0
simsample47	-50.95	5107750	3.41619	2.60595	0.0038615	0.0038615	6.14759	5.95964	0.0845514	5	0	0	0	0	0	0	0	0	0	0	0	0	0	0	0	0	0	0	0	0	0	0	0	0	0	0	0	0	0	0	0	0	0	0	0	0	0	0	0
simsample48	-54.1	5670340	3.43243	2.53175	0.003975	0.003975	5.93975	5.66842	0.113857	5	0	0	0	0	0	0	0	0	0	0	0	0	0	0	0	0	0	0	0	0	0	0	0	0	0	0	0	0	0	0	0	0	0	0	0	0	0	0	0
simsample49	-45.25	4603290	3.36577	2.74841	0.00384464	0.00384464	5.69721	5.87209	0.0755811	5	0	0	0	0	0	0	0	0	0	0	0	0	0	0	0	0	0	0	0	0	0	0	0	0	0	0	0	0	0	0	0	0	0	0	0	0	0	0	0
simsample50	-52.3	4498500	3.3451	2.73224	0.00393409	0.00393409	5.85685	5.88155	0.105145	5	0	0	0	0	0	0	0	0	0	0	0	0	0	0	0	0	0	0	0	0	0	0	0	0	0	0	0	0	0	0	0	0	0	0	0	0	0	0	0
simsample51	-58.55	4442620	3.3479	2.66095	0.00394591	0.00394591	5.91655	6.06595	0.113064	5	0	0	0	0	0	0	0	0	0	0	0	0	0	0	0	0	0	0	0	0	0	0	0	0	0	0	0	0	0	0	0	0	0	0	0	0	0	0	0
simsample52	-57.6	4265160	3.30699	2.7433	0.00392139	0.00392139	6.17325	5.78567	0.102993	5	0	0	0	0	0	0	0	0	0	0	0	0	0	0	0	0	0	0	0	0	0	0	0	0	0	0	0	0	0	0	0	0	0	0	0	0	0	0	0
simsample53	-52.8	4415210	3.31411	2.61874	0.00395368	0.00395368	5.7451	5.8089	0.114536	5	0	0	0	0	0	0	0	0	0	0	0	0	0	0	0	0	0	0	0	0	0	0	0	0	0	0	0	0	0	0	0	0	0	0	0	0	0	0	0
simsample54	-50.1	4338550	3.32657	2.77127	0.00391252	0.00391252	5.82093	5.83414	0.0957206	5	0	0	0	0	0	0	0	0	0	0	0	0	0	0	0	0	0	0	0	0	0	0	0	0	0	0	0	0	0	0	0	0	0	0	0	0	0	0	0
simsample55	-48.4	4357210	3.31605	2.65849	0.00388831	0.00388831	5.63441	5.82567	0.0945592	5	0	0	0	0	0	0	0	0	0	0	0	0	0	0	0	0	0	0	0	0	0	0	0	0	0	0	0	0	0	0	0	0	0	0	0	0	0	0	0
simsample56	-49.95	5112470	3.40408	2.61559	0.0038709	0.0038709	6.14154	5.95982	0.0981394	5	0	0	0	0	0	0	0	0	0	0	0	0	0	0	0	0	0	0	0	0	0	0	0	0	0	0	0	0	0	0	0	0	0	0	0	0	0	0	0
simsample57	-50.65	5032720	3.3893	2.60584	0.00387301	0.00387301	6.15457	5.76414	0.0880392	5	0	0	0	0	0	0	0	0	0	0	0	0	0	0	0	0	0	0	0	0	0	0	0	0	0	0	0	0	0	0	0	0	0	0	0	0	0	0	0
simsample58	-50.6	4320410	3.33389	2.75829	0.00392169	0.00392169	5.74373	5.96376	0.0965141	5	0	0	0	0	0	0	0	0	0	0	0	0	0	0	0	0	0	0	0	0	0	0	0	0	0	0	0	0	0	0	0	0	0	0	0	0	0	0	0
simsample59	-49.55	4967770	3.37135	2.75853	0.0039339	0.0039339	5.9571	5.61002	0.108025	5	0	0	0	0	0	0	0	0	0	0	0	0	0	0	0	0	0	0	0	0	0	0	0	0	0	0	0	0	0	0	0	0	0	0	0	0	0	0	0
simsample60	-48.9	4343160	3.34124	2.8144	0.00389185	0.00389185	5.63922	5.85097	0.0855227	5	0	0	0	0	0	0	0	0	0	0	0	0	0	0	0	0	0	0	0	0	0	0	0	0	0	0	0	0	0	0	0	0	0	0	0	0	0	0	0
simsample61	-52.6	4845100	3.3823	2.8202	0.00398355	0.00398355	5.79718	5.72235	0.109619	5	0	0	0	0	0	0	0	0	0	0	0	0	0	0	0	0	0	0	0	0	0	0	0	0	0	0	0	0	0	0	0	0	0	0	0	0	0	0	0
simsample62	-51.7	4793550	3.34731	2.79754	0.00403799	0.00403799	5.7762	5.47873	0.120003	5	0	0	0	0	0	0	0	0	0	0	0	0	0	0	0	0	0	0	0	0	0	0	0	0	0	0	0	0	0	0	0	0	0	0	0	0	0	0	0
simsample63	-55.1	4396610	3.36484	2.80283	0.00388164	0.00388164	6.01909	6.07324	0.088135	5	0	0	0	0	0	0	0	0	0	0	0	0	0	0	0	0	0	0	0	0	0	0	0	0	0	0	0	0	0	0	0	0	0	0	0	0	0	0	0
simsample64	-51.1	5091910	3.38788	2.62061	0.00388208	0.00388208	6.17797	5.77373	0.100503	5	0	0	0	0	0	0	0	0	0	0	0	0	0	0	0	0	0	0	0	0	0	0	0	0	0	0	0	0	0	0	0	0	0	0	0	0	0	0	0
simsample65	-50.25	4187840	3.29591	2.80036	0.00389695	0.00389695	6.01868	5.70535	0.0912865	5	0	0	0	0	0	0	0	0	0	0	0	0	0	0	0	0	0	0	0	0	0	0	0	0	0	0	0	0	0	0	0	0	0	0	0	0	0	0	0
simsample66	-47.7	4569650	3.38452	2.8102	0.00384663	0.00384663	5.82007	6.03063	0.0740585	5	0	0	0	0	0	0	0	0	0	0	0	0	0	0	0	0	0	0	0	0	0	0	0	0	0	0	0	0	0	0	0	0	0	0	0	0	0	0	0
simsample67	-53.9	4385920	3.33399	2.82731	0.00396448	0.00396448	5.93391	5.90242	0.114832	5	0	0	0	0	0	0	0	0	0	0	0	0	0	0	0	0	0	0	0	0	0	0	0	0	0	0	0	0	0	0	0	0	0	0	0	0	0	0	0
simsample68	-55.05	4937180	3.4143	2.82721	0.00395052	0.00395052	5.95797	5.92317	0.100538	5	0	0	0	0	0	0	0	0	0	0	0	0	0	0	0	0	0	0	0	0	0	0	0	0	0	0	0	0	0	0	0	0	0	0	0	0	0	0	0
simsample69	-50.35	5221370	3.42467	2.66982	0.00390647	0.00390647	6.06378	5.88472	0.0894685	5	0	0	0	0	0	0	0	0	0	0	0	0	0	0	0	0	0	0	0	0	0	0	0	0	0	0	0	0	0	0	0	0	0	0	0	0	0	0	0
simsample70	-48	4999830	3.39529	2.62323	0.0038431	0.0038431	6.00828	5.82084	0.0831731	5	0	0	0	0	0	0	0	0	0	0	0	0	0	0	0	0	0	0	0	0	0	0	0	0	0	0	0	0	0	0	0	0	0	0	0	0	0	0	0
simsample71	-52.8	4787300	3.35096	2.80619	0.00403799	0.00403799	5.76267	5.47127	0.116382	5	0	0	0	0	0	0	0	0	0	0	0	0	0	0	0	0	0	0	0	0	0	0	0	0	0	0	0	0	0	0	0	0	0	0	0	0	0	0	0
simsample72	-49.65	4334210	3.32106	2.78481	0.00391252	0.00391252	5.74956	5.84267	0.100924	5	0	0	0	0	0	0	0	0	0	0	0	0	0	0	0	0	0	0	0	0	0	0	0	0	0	0	0	0	0	0	0	0	0	0	0	0	0	0	0
simsample73	-52.75	4608020	3.37482	2.81854	0.00395106	0.00395106	5.81813	6.00162	0.106912	5	0	0	0	0	0	0	0	0	0	0	0	0	0	0	0	0	0	0	0	0	0	0	0	0	0	0	0	0	0	0	0	0	0	0	0	0	0	0	0
simsample74	-52.95	4344000	3.35714	2.83206	0.00390792	0.00390792	6.0296	6.099	0.0948692	5	0	0	0	0	0	0	0	0	0	0	0	0	0	0	0	0	0	0	0	0	0	0	0	0	0	0	0	0	0	0	0	0	0	0	0	0	0	0	0
simsample75	-56.8	4733360	3.37938	2.78649	0.00400266	0.00400266	5.84399	5.7266	0.0998206	5	0	0	0	0	0	0	0	0	0	0	0	0	0	0	0	0	0	0	0	0	0	0	0	0	0	0	0	0	0	0	0	0	0	0	0	0	0	0	0
simsample76	-55.35	4178290	3.30165	2.78789	0.00395078	0.00395078	6.04641	5.87364	0.111184	5	0	0	0	0	0	0	0	0	0	0	0	0	0	0	0	0	0	0	0	0	0	0	0	0	0	0	0	0	0	0	0	0	0	0	0	0	0	0	0
simsample77	-57	4846200	3.37568	2.85631	0.00404658	0.00404658	5.82364	5.591	0.116625	5	0	0	0	0	0	0	0	0	0	0	0	0	0	0	0	0	0	0	0	0	0	0	0	0	0	0	0	0	0	0	0	0	0	0	0	0	0	0	0
simsample78	-56.15	4202390	3.32051	2.79217	0.00391545	0.00391545	6.05059	5.91321	0.0969189	5	0	0	0	0	0	0	0	0	0	0	0	0	0	0	0	0	0	0	0	0	0	0	0	0	0	0	0	0	0	0	0	0	0	0	0	0	0	0	0
simsample79	-47.1	4344320	3.33785	2.81245	0.00386701	0.00386701	5.75155	5.97155	0.0909801	5	0	0	0	0	0	0	0	0	0	0	0	0	0	0	0	0	0	0	0	0	0	0	0	0	0	0	0	0	0	0	0	0	0	0	0	0	0	0	0
simsample80	-51.35	4952750	3.39427	2.8507	0.0039877	0.0039877	5.82403	5.69032	0.105637	5	0	0	0	0	0	0	0	0	0	0	0	0	0	0	0	0	0	0	0	0	0	0	0	0	0	0	0	0	0	0	0	0	0	0	0	0	0	0	0
simsample81	-52.9	4398360	3.33109	2.82644	0.00396448	0.00396448	5.94369	5.91166	0.118765	5	0	0	0	0	0	0	0	0	0	0	0	0	0	0	0	0	0	0	0	0	0	0	0	0	0	0	0	0	0	0	0	0	0	0	0	0	0	0	0
simsample82	-52.35	4504360	3.34335	2.70502	0.00393409	0.00393409	5.78856	5.86676	0.106334	5	0	0	0	0	0	0	0	0	0	0	0	0	0	0	0	0	0	0	0	0	0	0	0	0	0	0	0	0	0	0	0	0	0	0	0	0	0	0	0
simsample83	-51.8	4384900	3.36256	2.79805	0.00389485	0.00389485	5.75492	6.09906	0.0915232	5	0	0	0	0	0	0	0	0	0	0	0	0	0	0	0	0	0	0	0	0	0	0	0	0	0	0	0	0	0	0	0	0	0	0	0	0	0	0	0
simsample84	-52.85	4640950	3.37961	2.80269	0.00395106	0.00395106	5.82089	5.99645	0.104266	5	0	0	0	0	0	0	0	0	0	0	0	0	0	0	0	0	0	0	0	0	0	0	0	0	0	0	0	0	0	0	0	0	0	0	0	0	0	0	0
simsample85	-54.7	4387290	3.33959	2.81917	0.00396448	0.00396448	5.91771	5.8903	0.109035	5	0	0	0	0	0	0	0	0	0	0	0	0	0	0	0	0	0	0	0	0	0	0	0	0	0	0	0	0	0	0	0	0	0	0	0	0	0	0	0
simsample86	-53.85	5389830	3.43627	2.68685	0.00395988	0.00395988	6.00888	5.7923	0.104204	5	0	0	0	0	0	0	0	0	0	0	0	0	0	0	0	0	0	0	0	0	0	0	0	0	0	0	0	0	0	0	0	0	0	0	0	0	0	0	0
simsample87	-45	4594670	3.36735	2.74417	0.0038218	0.0038218	5.70636	5.86402	0.0683893	5	0	0	0	0	0	0	0	0	0	0	0	0	0	0	0	0	0	0	0	0	0	0	0	0	0	0	0	0	0	0	0	0	0	0	0	0	0	0	0
simsample88	-55.5	4886630	3.36712	2.83053	0.00408376	0.00408376	5.6407	5.54604	0.13052	5	0	0	0	0	0	0	0	0	0	0	0	0	0	0	0	0	0	0	0	0	0	0	0	0	0	0	0	0	0	0	0	0	0	0	0	0	0	0	0
simsample89	-51	5323810	3.42788	2.71715	0.00391708	0.00391708	6.05405	5.86909	0.102419	5	0	0	0	0	0	0	0	0	0	0	0	0	0	0	0	0	0	0	0	0	0	0	0	0	0	0	0	0	0	0	0	0	0	0	0	0	0	0	0
simsample90	-56.65	5360110	3.43112	2.6763	0.00395988	0.00395988	6.02561	5.70796	0.0997652	5	0	0	0	0	0	0	0	0	0	0	0	0	0	0	0	0	0	0	0	0	0	0	0	0	0	0	0	0	0	0	0	0	0	0	0	0	0	0	0
simsample91	-60.8	5348120	3.42798	2.66059	0.00402301	0.00402301	6.08677	5.89016	0.124303	5	0	0	0	0	0	0	0	0	0	0	0	0	0	0	0	0	0	0	0	0	0	0	0	0	0	0	0	0	0	0	0	0	0	0	0	0	0	0	0
simsample92	-60.7	5378510	3.43665	2.68102	0.00402301	0.00402301	6.04385	5.89416	0.121583	5	0	0	0	0	0	0	0	0	0	0	0	0	0	0	0	0	0	0	0	0	0	0	0	0	0	0	0	0	0	0	0	0	0	0	0	0	0	0	0
simsample93	-54.4	4844660	3.35782	2.815	0.00403627	0.00403627	5.92589	5.51981	0.120999	5	0	0	0	0	0	0	0	0	0	0	0	0	0	0	0	0	0	0	0	0	0	0	0	0	0	0	0	0	0	0	0	0	0	0	0	0	0	0	0
simsample94	-60.9	5362990	3.4443	2.6899	0.00402807	0.00402807	6.02749	5.88878	0.112584	5	0	0	0	0	0	0	0	0	0	0	0	0	0	0	0	0	0	0	0	0	0	0	0	0	0	0	0	0	0	0	0	0	0	0	0	0	0	0	0
simsample95	-53.05	4368840	3.3464	2.72662	0.00392706	0.00392706	5.74279	6.03033	0.0999965	5	0	0	0	0	0	0	0	0	0	0	0	0	0	0	0	0	0	0	0	0	0	0	0	0	0	0	0	0	0	0	0	0	0	0	0	0	0	0	0
simsample96	-53.9	4468600	3.35339	2.77295	0.00392494	0.00392494	6.02887	6.13802	0.114189	5	0	0	0	0	0	0	0	0	0	0	0	0	0	0	0	0	0	0	0	0	0	0	0	0	0	0	0	0	0	0	0	0	0	0	0	0	0	0	0
simsample97	-52.5	4201860	3.29259	2.79631	0.00392328	0.00392328	5.98476	5.65476	0.101265	5	0	0	0	0	0	0	0	0	0	0	0	0	0	0	0	0	0	0	0	0	0	0	0	0	0	0	0	0	0	0	0	0	0	0	0	0	0	0	0
simsample98	-59.85	5474370	3.40927	2.48384	0.00404269	0.00404269	5.99015	5.7228	0.133059	5	0	0	0	0	0	0	0	0	0	0	0	0	0	0	0	0	0	0	0	0	0	0	0	0	0	0	0	0	0	0	0	0	0	0	0	0	0	0	0
simsample99	-51.2	4949140	3.36982	2.71866	0.0039339	0.0039339	6.04802	5.61766	0.107107	5	0	0	0	0	0	0	0	0	0	0	0	0	0	0	0	0	0	0	0	0	0	0	0	0	0	0	0	0	0	0	0	0	0	0	0	0	0	0	0
simsample100	-55.75	4431030	3.34089	2.75233	0.00400224	0.00400224	5.6452	5.89118	0.113566	5	0	0	0	0	0	0	0	0	0	0	0	0	0	0	0	0	0	0	0	0	0	0	0	0	0	0	0	0	0	0	0	0	0	0	0	0	0	0	0
simsample101	-50.7	4401560	3.33494	2.77881	0.00391036	0.00391036	5.95209	5.84268	0.0935583	5	0	0	0	0	0	0	0	0	0	0	0	0	0	0	0	0	0	0	0	0	0	0	0	0	0	0	0	0	0	0	0	0	0	0	0	0	0	0	0
simsample102	-62.85	5456090	3.43595	2.47071	0.00402428	0.00402428	5.88246	6.00375	0.126783	5	0	0	0	0	0	0	0	0	0	0	0	0	0	0	0	0	0	0	0	0	0	0	0	0	0	0	0	0	0	0	0	0	0	0	0	0	0	0	0
simsample103	-55.1	4451640	3.32533	2.64285	0.0039914	0.0039914	5.70749	5.89527	0.12343	5	0	0	0	0	0	0	0	0	0	0	0	0	0	0	0	0	0	0	0	0	0	0	0	0	0	0	0	0	0	0	0	0	0	0	0	0	0	0	0
simsample104	-54.25	4416160	3.34324	2.72957	0.00389605	0.00389605	6.0602	5.94256	0.0956237	5	0	0	0	0	0	0	0	0	0	0	0	0	0	0	0	0	0	0	0	0	0	0	0	0	0	0	0	0	0	0	0	0	0	0	0	0	0	0	0
simsample105	-54.75	4919680	3.40908	2.90127	0.00402296	0.00402296	5.74569	5.82645	0.11064	5	0	0	0	0	0	0	0	0	0	0	0	0	0	0	0	0	0	0	0	0	0	0	0	0	0	0	0	0	0	0	0	0	0	0	0	0	0	0	0
simsample106	-50.1	4336990	3.30551	2.65386	0.00394142	0.00394142	5.60691	5.66578	0.0958181	5	0	0	0	0	0	0	0	0	0	0	0	0	0	0	0	0	0	0	0	0	0	0	0	0	0	0	0	0	0	0	0	0	0	0	0	0	0	0	0
simsample107	-52.05	4404150	3.35906	2.68511	0.00388718	0.00388718	5.7322	6.16989	0.0908851	5	0	0	0	0	0	0	0	0	0	0	0	0	0	0	0	0	0	0	0	0	0	0	0	0	0	0	0	0	0	0	0	0	0	0	0	0	0	0	0
simsample108	-56.15	5325650	3.42995	2.66992	0.00395988	0.00395988	6.10822	5.76521	0.101475	5	0	0	0	0	0	0	0	0	0	0	0	0	0	0	0	0	0	0	0	0	0	0	0	0	0	0	0	0	0	0	0	0	0	0	0	0	0	0	0
simsample109	-56.35	5307770	3.41808	2.70572	0.00398898	0.00398898	6.13881	5.8402	0.12109	5	0	0	0	0	0	0	0	0	0	0	0	0	0	0	0	0	0	0	0	0	0	0	0	0	0	0	0	0	0	0	0	0	0	0	0	0	0	0	0
simsample110	-55.2	4194960	3.30442	2.83474	0.00394785	0.00394785	5.94759	5.73198	0.105789	5	0	0	0	0	0	0	0	0	0	0	0	0	0	0	0	0	0	0	0	0	0	0	0	0	0	0	0	0	0	0	0	0	0	0	0	0	0	0	0
simsample111	-49.65	5659370	3.4229	2.47088	0.00392582	0.00392582	5.98212	5.60938	0.099324	5	0	0	0	0	0	0	0	0	0	0	0	0	0	0	0	0	0	0	0	0	0	0	0	0	0	0	0	0	0	0	0	0	0	0	0	0	0	0	0
simsample112	-47.55	4649800	3.36585	2.76747	0.00388828	0.00388828	5.82195	5.87842	0.0907247	5	0	0	0	0	0	0	0	0	0	0	0	0	0	0	0	0	0	0	0	0	0	0	0	0	0	0	0	0	0	0	0	0	0	0	0	0	0	0	0
simsample113	-54.85	4268390	3.31306	2.58558	0.00394147	0.00394147	5.80094	5.99584	0.106539	5	0	0	0	0	0	0	0	0	0	0	0	0	0	0	0	0	0	0	0	0	0	0	0	0	0	0	0	0	0	0	0	0	0	0	0	0	0	0	0
simsample114	-52.35	4610500	3.36946	2.77023	0.00391638	0.00391638	5.87569	5.97494	0.100991	5	0	0	0	0	0	0	0	0	0	0	0	0	0	0	0	0	0	0	0	0	0	0	0	0	0	0	0	0	0	0	0	0	0	0	0	0	0	0	0
simsample115	-49.75	4320400	3.32339	2.78804	0.00391174	0.00391174	5.72902	5.81944	0.096832	5	0	0	0	0	0	0	0	0	0	0	0	0	0	0	0	0	0	0	0	0	0	0	0	0	0	0	0	0	0	0	0	0	0	0	0	0	0	0	0
simsample116	-57	4401540	3.34592	2.65631	0.00394964	0.00394964	5.82481	5.99179	0.0997057	5	0	0	0	0	0	0	0	0	0	0	0	0	0	0	0	0	0	0	0	0	0	0	0	0	0	0	0	0	0	0	0	0	0	0	0	0	0	0	0
simsample117	-56.6	4176480	3.29764	2.75351	0.00394655	0.00394655	5.95188	5.8742	0.115308	5	0	0	0	0	0	0	0	0	0	0	0	0	0	0	0	0	0	0	0	0	0	0	0	0	0	0	0	0	0	0	0	0	0	0	0	0	0	0	0
simsample118	-58.8	4459960	3.35145	2.663	0.00394591	0.00394591	5.91142	6.05324	0.10887	5	0	0	0	0	0	0	0	0	0	0	0	0	0	0	0	0	0	0	0	0	0	0	0	0	0	0	0	0	0	0	0	0	0	0	0	0	0	0	0
simsample119	-53.2	4751960	3.35334	2.81759	0.00403026	0.00403026	5.81629	5.55773	0.116293	5	0	0	0	0	0	0	0	0	0	0	0	0	0	0	0	0	0	0	0	0	0	0	0	0	0	0	0	0	0	0	0	0	0	0	0	0	0	0	0
simsample120	-49.25	4389280	3.34108	2.70075	0.00389475	0.00389475	5.61727	5.87864	0.0834416	5	0	0	0	0	0	0	0	0	0	0	0	0	0	0	0	0	0	0	0	0	0	0	0	0	0	0	0	0	0	0	0	0	0	0	0	0	0	0	0
simsample121	-55.9	4252750	3.30685	2.7537	0.00394054	0.00394054	5.92754	5.81	0.109027	5	0	0	0	0	0	0	0	0	0	0	0	0	0	0	0	0	0	0	0	0	0	0	0	0	0	0	0	0	0	0	0	0	0	0	0	0	0	0	0
simsample122	-56.9	4775010	3.39453	2.79389	0.00396518	0.00396518	6.05182	5.97884	0.101468	5	0	0	0	0	0	0	0	0	0	0	0	0	0	0	0	0	0	0	0	0	0	0	0	0	0	0	0	0	0	0	0	0	0	0	0	0	0	0	0
simsample123	-57.85	4359180	3.32548	2.78486	0.00396426	0.00396426	6.06484	5.85731	0.114308	5	0	0	0	0	0	0	0	0	0	0	0	0	0	0	0	0	0	0	0	0	0	0	0	0	0	0	0	0	0	0	0	0	0	0	0	0	0	0	0
simsample124	-52.8	4799440	3.38251	2.80637	0.0039701	0.0039701	5.7763	5.76241	0.105955	5	0	0	0	0	0	0	0	0	0	0	0	0	0	0	0	0	0	0	0	0	0	0	0	0	0	0	0	0	0	0	0	0	0	0	0	0	0	0	0
simsample125	-51.15	4237200	3.34191	2.83022	0.00385591	0.00385591	5.96523	6.07251	0.0844087	5	0	0	0	0	0	0	0	0	0	0	0	0	0	0	0	0	0	0	0	0	0	0	0	0	0	0	0	0	0	0	0	0	0	0	0	0	0	0	0
simsample126	-49.45	4426930	3.36506	2.8127	0.00390121	0.00390121	5.75797	6.10627	0.0930464	5	0	0	0	0	0	0	0	0	0	0	0	0	0	0	0	0	0	0	0	0	0	0	0	0	0	0	0	0	0	0	0	0	0	0	0	0	0	0	0
simsample127	-60.6	5595740	3.4333	2.45135	0.00401672	0.00401672	6.03248	5.90489	0.12707	5	0	0	0	0	0	0	0	0	0	0	0	0	0	0	0	0	0	0	0	0	0	0	0	0	0	0	0	0	0	0	0	0	0	0	0	0	0	0	0
simsample128	-58.8	4443110	3.34779	2.74602	0.00394823	0.00394823	6.06258	5.98105	0.110173	5	0	0	0	0	0	0	0	0	0	0	0	0	0	0	0	0	0	0	0	0	0	0	0	0	0	0	0	0	0	0	0	0	0	0	0	0	0	0	0
simsample129	-57.2	5250630	3.41166	2.71281	0.00398115	0.00398115	6.15344	5.76309	0.117133	5	0	0	0	0	0	0	0	0	0	0	0	0	0	0	0	0	0	0	0	0	0	0	0	0	0	0	0	0	0	0	0	0	0	0	0	0	0	0	0
simsample130	-51.5	4418260	3.34608	2.72086	0.00388719	0.00388719	5.95625	5.97655	0.0903303	5	0	0	0	0	0	0	0	0	0	0	0	0	0	0	0	0	0	0	0	0	0	0	0	0	0	0	0	0	0	0	0	0	0	0	0	0	0	0	0
simsample131	-62.65	5483850	3.4216	2.52324	0.00404472	0.00404472	6.07369	5.7435	0.127305	5	0	0	0	0	0	0	0	0	0	0	0	0	0	0	0	0	0	0	0	0	0	0	0	0	0	0	0	0	0	0	0	0	0	0	0	0	0	0	0
simsample132	-47.5	4353720	3.3453	2.82146	0.00386701	0.00386701	5.68913	5.97957	0.0881418	5	0	0	0	0	0	0	0	0	0	0	0	0	0	0	0	0	0	0	0	0	0	0	0	0	0	0	0	0	0	0	0	0	0	0	0	0	0	0	0
simsample133	-50.15	4484050	3.35157	2.79837	0.00391082	0.00391082	5.78172	5.86598	0.0950784	5	0	0	0	0	0	0	0	0	0	0	0	0	0	0	0	0	0	0	0	0	0	0	0	0	0	0	0	0	0	0	0	0	0	0	0	0	0	0	0
simsample134	-51.3	4256260	3.31401	2.78621	0.00388519	0.00388519	6.05954	5.82324	0.0922858	5	0	0	0	0	0	0	0	0	0	0	0	0	0	0	0	0	0	0	0	0	0	0	0	0	0	0	0	0	0	0	0	0	0	0	0	0	0	0	0
simsample135	-53.85	5685280	3.4368	2.49098	0.00396723	0.00396723	5.89877	5.64836	0.104851	5	0	0	0	0	0	0	0	0	0	0	0	0	0	0	0	0	0	0	0	0	0	0	0	0	0	0	0	0	0	0	0	0	0	0	0	0	0	0	0
simsample136	-62.1	5386290	3.41229	2.4371	0.00403049	0.00403049	5.97661	5.85279	0.129097	5	0	0	0	0	0	0	0	0	0	0	0	0	0	0	0	0	0	0	0	0	0	0	0	0	0	0	0	0	0	0	0	0	0	0	0	0	0	0	0
simsample137	-50.3	4789680	3.39148	2.84219	0.00390465	0.00390465	5.9917	5.93289	0.0974078	5	0	0	0	0	0	0	0	0	0	0	0	0	0	0	0	0	0	0	0	0	0	0	0	0	0	0	0	0	0	0	0	0	0	0	0	0	0	0	0
simsample138	-48.6	4536310	3.38806	2.80995	0.00384663	0.00384663	5.84533	6.17401	0.0796352	5	0	0	0	0	0	0	0	0	0	0	0	0	0	0	0	0	0	0	0	0	0	0	0	0	0	0	0	0	0	0	0	0	0	0	0	0	0	0	0
simsample139	-52.55	4159940	3.29974	2.78338	0.00392178	0.00392178	5.94886	5.66699	0.0896083	5	0	0	0	0	0	0	0	0	0	0	0	0	0	0	0	0	0	0	0	0	0	0	0	0	0	0	0	0	0	0	0	0	0	0	0	0	0	0	0
simsample140	-53.55	4749530	3.34687	2.80342	0.00403799	0.00403799	5.72045	5.46124	0.117904	5	0	0	0	0	0	0	0	0	0	0	0	0	0	0	0	0	0	0	0	0	0	0	0	0	0	0	0	0	0	0	0	0	0	0	0	0	0	0	0
simsample141	-49.85	4286100	3.32205	2.80622	0.00389055	0.00389055	5.74932	5.84165	0.0928256	5	0	0	0	0	0	0	0	0	0	0	0	0	0	0	0	0	0	0	0	0	0	0	0	0	0	0	0	0	0	0	0	0	0	0	0	0	0	0	0
simsample142	-47.75	4650930	3.36035	2.75876	0.00388828	0.00388828	5.82189	5.89842	0.0988971	5	0	0	0	0	0	0	0	0	0	0	0	0	0	0	0	0	0	0	0	0	0	0	0	0	0	0	0	0	0	0	0	0	0	0	0	0	0	0	0
simsample143	-54.7	4840480	3.35647	2.81909	0.00403627	0.00403627	5.93722	5.48445	0.118919	5	0	0	0	0	0	0	0	0	0	0	0	0	0	0	0	0	0	0	0	0	0	0	0	0	0	0	0	0	0	0	0	0	0	0	0	0	0	0	0
simsample144	-60.6	5473480	3.41802	2.50756	0.00404407	0.00404407	6.00618	5.75968	0.12973	5	0	0	0	0	0	0	0	0	0	0	0	0	0	0	0	0	0	0	0	0	0	0	0	0	0	0	0	0	0	0	0	0	0	0	0	0	0	0	0
simsample145	-51.8	4561930	3.34344	2.74627	0.00394841	0.00394841	5.7627	5.85764	0.116794	5	0	0	0	0	0	0	0	0	0	0	0	0	0	0	0	0	0	0	0	0	0	0	0	0	0	0	0	0	0	0	0	0	0	0	0	0	0	0	0
simsample146	-51.7	4319750	3.31418	2.73079	0.00390276	0.00390276	5.96898	6.00456	0.117907	5	0	0	0	0	0	0	0	0	0	0	0	0	0	0	0	0	0	0	0	0	0	0	0	0	0	0	0	0	0	0	0	0	0	0	0	0	0	0	0
simsample147	-52.3	4268890	3.31682	2.60605	0.00393428	0.00393428	5.69836	6.0122	0.102957	5	0	0	0	0	0	0	0	0	0	0	0	0	0	0	0	0	0	0	0	0	0	0	0	0	0	0	0	0	0	0	0	0	0	0	0	0	0	0	0
simsample148	-59	4764560	3.35591	2.76909	0.00406406	0.00406406	5.82136	5.5187	0.120526	5	0	0	0	0	0	0	0	0	0	0	0	0	0	0	0	0	0	0	0	0	0	0	0	0	0	0	0	0	0	0	0	0	0	0	0	0	0	0	0
simsample149	-50.8	4311480	3.30418	2.75121	0.00388694	0.00388694	6.05101	5.70721	0.0957929	5	0	0	0	0	0	0	0	0	0	0	0	0	0	0	0	0	0	0	0	0	0	0	0	0	0	0	0	0	0	0	0	0	0	0	0	0	0	0	0
simsample150	-54.9	4946250	3.41758	2.77794	0.00394618	0.00394618	5.9577	5.90583	0.0909434	5	0	0	0	0	0	0	0	0	0	0	0	0	0	0	0	0	0	0	0	0	0	0	0	0	0	0	0	0	0	0	0	0	0	0	0	0	0	0	0
simsample151	-49.05	4419350	3.32795	2.74546	0.00390276	0.00390276	5.87629	5.8536	0.0994953	5	0	0	0	0	0	0	0	0	0	0	0	0	0	0	0	0	0	0	0	0	0	0	0	0	0	0	0	0	0	0	0	0	0	0	0	0	0	0	0
simsample152	-54.95	4448480	3.35467	2.83206	0.00399698	0.00399698	5.70643	5.94209	0.11094	5	0	0	0	0	0	0	0	0	0	0	0	0	0	0	0	0	0	0	0	0	0	0	0	0	0	0	0	0	0	0	0	0	0	0	0	0	0	0	0
simsample153	-58.45	5229540	3.41681	2.6748	0.00398115	0.00398115	6.12362	5.80147	0.11074	5	0	0	0	0	0	0	0	0	0	0	0	0	0	0	0	0	0	0	0	0	0	0	0	0	0	0	0	0	0	0	0	0	0	0	0	0	0	0	0
simsample154	-55.8	4434120	3.35315	2.82183	0.00398969	0.00398969	5.69216	5.86881	0.105058	5	0	0	0	0	0	0	0	0	0	0	0	0	0	0	0	0	0	0	0	0	0	0	0	0	0	0	0	0	0	0	0	0	0	0	0	0	0	0	0
simsample155	-53.35	4419150	3.34534	2.75369	0.00398563	0.00398563	5.56394	5.91289	0.107859	5	0	0	0	0	0	0	0	0	0	0	0	0	0	0	0	0	0	0	0	0	0	0	0	0	0	0	0	0	0	0	0	0	0	0	0	0	0	0	0
simsample156	-60.9	5496250	3.40885	2.48731	0.00404269	0.00404269	5.99566	5.74171	0.137084	5	0	0	0	0	0	0	0	0	0	0	0	0	0	0	0	0	0	0	0	0	0	0	0	0	0	0	0	0	0	0	0	0	0	0	0	0	0	0	0
simsample157	-51.7	4321640	3.3117	2.75817	0.00388694	0.00388694	6.08725	5.68744	0.0910634	5	0	0	0	0	0	0	0	0	0	0	0	0	0	0	0	0	0	0	0	0	0	0	0	0	0	0	0	0	0	0	0	0	0	0	0	0	0	0	0
simsample158	-57.1	4727770	3.33968	2.76891	0.00406406	0.00406406	5.79067	5.55358	0.132086	5	0	0	0	0	0	0	0	0	0	0	0	0	0	0	0	0	0	0	0	0	0	0	0	0	0	0	0	0	0	0	0	0	0	0	0	0	0	0	0
simsample159	-57.25	4716490	3.3457	2.77628	0.00406406	0.00406406	5.79707	5.56357	0.12412	5	0	0	0	0	0	0	0	0	0	0	0	0	0	0	0	0	0	0	0	0	0	0	0	0	0	0	0	0	0	0	0	0	0	0	0	0	0	0	0
simsample160	-52.8	5675040	3.42494	2.51223	0.003975	0.003975	5.91291	5.66456	0.11879	5	0	0	0	0	0	0	0	0	0	0	0	0	0	0	0	0	0	0	0	0	0	0	0	0	0	0	0	0	0	0	0	0	0	0	0	0	0	0	0
simsample161	-50.9	4600810	3.37444	2.77046	0.0039048	0.0039048	5.83913	5.96421	0.0955033	5	0	0	0	0	0	0	0	0	0	0	0	0	0	0	0	0	0	0	0	0	0	0	0	0	0	0	0	0	0	0	0	0	0	0	0	0	0	0	0
simsample162	-52.7	4886570	3.37083	2.85869	0.00403555	0.00403555	5.82401	5.54951	0.118246	5	0	0	0	0	0	0	0	0	0	0	0	0	0	0	0	0	0	0	0	0	0	0	0	0	0	0	0	0	0	0	0	0	0	0	0	0	0	0	0
simsample163	-46.95	4525720	3.37737	2.79742	0.00384663	0.00384663	5.80722	6.06094	0.0756911	5	0	0	0	0	0	0	0	0	0	0	0	0	0	0	0	0	0	0	0	0	0	0	0	0	0	0	0	0	0	0	0	0	0	0	0	0	0	0	0
simsample164	-61.55	5373590	3.41789	2.45784	0.00402321	0.00402321	5.90583	5.95665	0.128506	5	0	0	0	0	0	0	0	0	0	0	0	0	0	0	0	0	0	0	0	0	0	0	0	0	0	0	0	0	0	0	0	0	0	0	0	0	0	0	0
simsample165	-58.15	5386690	3.4337	2.68391	0.00402807	0.00402807	6.03051	5.89006	0.121215	5	0	0	0	0	0	0	0	0	0	0	0	0	0	0	0	0	0	0	0	0	0	0	0	0	0	0	0	0	0	0	0	0	0	0	0	0	0	0	0
simsample166	-53.35	4434190	3.34416	2.78805	0.00399236	0.00399236	5.56912	5.90839	0.114937	5	0	0	0	0	0	0	0	0	0	0	0	0	0	0	0	0	0	0	0	0	0	0	0	0	0	0	0	0	0	0	0	0	0	0	0	0	0	0	0
simsample167	-53.1	4316420	3.33864	2.78096	0.00393468	0.00393468	5.6816	5.9586	0.103946	5	0	0	0	0	0	0	0	0	0	0	0	0	0	0	0	0	0	0	0	0	0	0	0	0	0	0	0	0	0	0	0	0	0	0	0	0	0	0	0
simsample168	-50.95	5001430	3.40508	2.87352	0.00399423	0.00399423	5.65584	5.67507	0.101864	5	0	0	0	0	0	0	0	0	0	0	0	0	0	0	0	0	0	0	0	0	0	0	0	0	0	0	0	0	0	0	0	0	0	0	0	0	0	0	0
simsample169	-52.55	4877700	3.36786	2.8631	0.00403555	0.00403555	5.77175	5.59752	0.123906	5	0	0	0	0	0	0	0	0	0	0	0	0	0	0	0	0	0	0	0	0	0	0	0	0	0	0	0	0	0	0	0	0	0	0	0	0	0	0	0
simsample170	-48.55	4340500	3.29322	2.65259	0.00392912	0.00392912	5.68267	5.6174	0.102275	5	0	0	0	0	0	0	0	0	0	0	0	0	0	0	0	0	0	0	0	0	0	0	0	0	0	0	0	0	0	0	0	0	0	0	0	0	0	0	0
simsample171	-49.95	4422870	3.35774	2.6851	0.00387986	0.00387986	5.71034	6.13978	0.0878756	5	0	0	0	0	0	0	0	0	0	0	0	0	0	0	0	0	0	0	0	0	0	0	0	0	0	0	0	0	0	0	0	0	0	0	0	0	0	0	0
simsample172	-49.2	5102120	3.40944	2.60436	0.0038615	0.0038615	6.11419	6.0053	0.0938681	5	0	0	0	0	0	0	0	0	0	0	0	0	0	0	0	0	0	0	0	0	0	0	0	0	0	0	0	0	0	0	0	0	0	0	0	0	0	0	0
simsample173	-50.65	4305160	3.30689	2.75812	0.00388694	0.00388694	6.09817	5.67806	0.0916925	5	0	0	0	0	0	0	0	0	0	0	0	0	0	0	0	0	0	0	0	0	0	0	0	0	0	0	0	0	0	0	0	0	0	0	0	0	0	0	0
simsample174	-49.3	5044380	3.38203	2.62577	0.00388208	0.00388208	6.13153	5.79645	0.10229	5	0	0	0	0	0	0	0	0	0	0	0	0	0	0	0	0	0	0	0	0	0	0	0	0	0	0	0	0	0	0	0	0	0	0	0	0	0	0	0
simsample175	-51.45	4789840	3.34809	2.75808	0.00401374	0.00401374	5.76314	5.48546	0.11542	5	0	0	0	0	0	0	0	0	0	0	0	0	0	0	0	0	0	0	0	0	0	0	0	0	0	0	0	0	0	0	0	0	0	0	0	0	0	0	0
simsample176	-51.75	4418660	3.36483	2.80702	0.00390121	0.00390121	5.78973	6.10176	0.0950127	5	0	0	0	0	0	0	0	0	0	0	0	0	0	0	0	0	0	0	0	0	0	0	0	0	0	0	0	0	0	0	0	0	0	0	0	0	0	0	0
simsample177	-53.3	4429120	3.34079	2.7681	0.00400681	0.00400681	5.58853	5.88737	0.115509	5	0	0	0	0	0	0	0	0	0	0	0	0	0	0	0	0	0	0	0	0	0	0	0	0	0	0	0	0	0	0	0	0	0	0	0	0	0	0	0
simsample178	-61.9	5515690	3.43735	2.46895	0.00403141	0.00403141	5.95148	5.94428	0.120847	5	0	0	0	0	0	0	0	0	0	0	0	0	0	0	0	0	0	0	0	0	0	0	0	0	0	0	0	0	0	0	0	0	0	0	0	0	0	0	0
simsample179	-57	5315430	3.43152	2.67444	0.00395988	0.00395988	6.10787	5.76511	0.0969078	5	0	0	0	0	0	0	0	0	0	0	0	0	0	0	0	0	0	0	0	0	0	0	0	0	0	0	0	0	0	0	0	0	0	0	0	0	0	0	0
simsample180	-59.35	4442900	3.36779	2.79564	0.0039934	0.0039934	5.81697	6.06077	0.108428	5	0	0	0	0	0	0	0	0	0	0	0	0	0	0	0	0	0	0	0	0	0	0	0	0	0	0	0	0	0	0	0	0	0	0	0	0	0	0	0
simsample181	-44.15	4643010	3.37402	2.78227	0.00385597	0.00385597	5.68175	5.9248	0.0799339	5	0	0	0	0	0	0	0	0	0	0	0	0	0	0	0	0	0	0	0	0	0	0	0	0	0	0	0	0	0	0	0	0	0	0	0	0	0	0	0
simsample182	-50.85	4426160	3.3597	2.69123	0.00387203	0.00387203	5.71476	6.12117	0.089246	5	0	0	0	0	0	0	0	0	0	0	0	0	0	0	0	0	0	0	0	0	0	0	0	0	0	0	0	0	0	0	0	0	0	0	0	0	0	0	0
simsample183	-61.9	5416340	3.41723	2.57271	0.0040481	0.0040481	6.05386	5.7055	0.125477	5	0	0	0	0	0	0	0	0	0	0	0	0	0	0	0	0	0	0	0	0	0	0	0	0	0	0	0	0	0	0	0	0	0	0	0	0	0	0	0
simsample184	-52.65	4779840	3.37483	2.79674	0.00397457	0.00397457	5.87729	5.90244	0.11726	5	0	0	0	0	0	0	0	0	0	0	0	0	0	0	0	0	0	0	0	0	0	0	0	0	0	0	0	0	0	0	0	0	0	0	0	0	0	0	0
simsample185	-61.45	5536420	3.42059	2.57403	0.00403065	0.00403065	6.19135	5.70642	0.130687	5	0	0	0	0	0	0	0	0	0	0	0	0	0	0	0	0	0	0	0	0	0	0	0	0	0	0	0	0	0	0	0	0	0	0	0	0	0	0	0
simsample186	-48.95	4452080	3.33951	2.66671	0.00389468	0.00389468	5.62421	5.90975	0.0943199	5	0	0	0	0	0	0	0	0	0	0	0	0	0	0	0	0	0	0	0	0	0	0	0	0	0	0	0	0	0	0	0	0	0	0	0	0	0	0	0
simsample187	-51.6	4349410	3.32942	2.67767	0.00392768	0.00392768	5.6667	5.99165	0.105272	5	0	0	0	0	0	0	0	0	0	0	0	0	0	0	0	0	0	0	0	0	0	0	0	0	0	0	0	0	0	0	0	0	0	0	0	0	0	0	0
simsample188	-51.75	5229820	3.41875	2.66215	0.00391472	0.00391472	6.0782	5.91243	0.106843	5	0	0	0	0	0	0	0	0	0	0	0	0	0	0	0	0	0	0	0	0	0	0	0	0	0	0	0	0	0	0	0	0	0	0	0	0	0	0	0
simsample189	-52.35	4292300	3.3119	2.76991	0.00389556	0.00389556	6.13569	5.77491	0.0954317	5	0	0	0	0	0	0	0	0	0	0	0	0	0	0	0	0	0	0	0	0	0	0	0	0	0	0	0	0	0	0	0	0	0	0	0	0	0	0	0
simsample190	-56.05	4478640	3.36108	2.76839	0.00392494	0.00392494	5.97415	6.08677	0.10793	5	0	0	0	0	0	0	0	0	0	0	0	0	0	0	0	0	0	0	0	0	0	0	0	0	0	0	0	0	0	0	0	0	0	0	0	0	0	0	0
simsample191	-59.6	4298820	3.33112	2.81115	0.00398328	0.00398328	5.98129	5.94743	0.11818	5	0	0	0	0	0	0	0	0	0	0	0	0	0	0	0	0	0	0	0	0	0	0	0	0	0	0	0	0	0	0	0	0	0	0	0	0	0	0	0
simsample192	-50.8	4364430	3.33127	2.76105	0.00391252	0.00391252	5.82133	5.82704	0.0909287	5	0	0	0	0	0	0	0	0	0	0	0	0	0	0	0	0	0	0	0	0	0	0	0	0	0	0	0	0	0	0	0	0	0	0	0	0	0	0	0
simsample193	-48.2	4532340	3.35168	2.80254	0.00391082	0.00391082	5.77245	5.88647	0.098511	5	0	0	0	0	0	0	0	0	0	0	0	0	0	0	0	0	0	0	0	0	0	0	0	0	0	0	0	0	0	0	0	0	0	0	0	0	0	0	0
simsample194	-56.35	5342160	3.43037	2.66491	0.00395988	0.00395988	6.10831	5.7687	0.0996965	5	0	0	0	0	0	0	0	0	0	0	0	0	0	0	0	0	0	0	0	0	0	0	0	0	0	0	0	0	0	0	0	0	0	0	0	0	0	0	0
simsample195	-57.65	4421760	3.34912	2.7469	0.00391872	0.00391872	6.16729	5.95824	0.0957597	5	0	0	0	0	0	0	0	0	0	0	0	0	0	0	0	0	0	0	0	0	0	0	0	0	0	0	0	0	0	0	0	0	0	0	0	0	0	0	0
simsample196	-51.5	4948380	3.39403	2.8507	0.0039877	0.0039877	5.83438	5.69077	0.106697	5	0	0	0	0	0	0	0	0	0	0	0	0	0	0	0	0	0	0	0	0	0	0	0	0	0	0	0	0	0	0	0	0	0	0	0	0	0	0	0
simsample197	-50.35	4144130	3.31942	2.76686	0.00385577	0.00385577	6.05846	6.0708	0.0820228	5	0	0	0	0	0	0	0	0	0	0	0	0	0	0	0	0	0	0	0	0	0	0	0	0	0	0	0	0	0	0	0	0	0	0	0	0	0	0	0
simsample198	-55.1	4456200	3.35635	2.76895	0.00392494	0.00392494	5.98279	6.07514	0.107567	5	0	0	0	0	0	0	0	0	0	0	0	0	0	0	0	0	0	0	0	0	0	0	0	0	0	0	0	0	0	0	0	0	0	0	0	0	0	0	0
simsample199	-55	4421030	3.36253	2.75097	0.00387861	0.00387861	6.02987	6.11729	0.0936925	5	0	0	0	0	0	0	0	0	0	0	0	0	0	0	0	0	0	0	0	0	0	0	0	0	0	0	0	0	0	0	0	0	0	0	0	0	0	0	0
simsample200	-54.6	4858800	3.35559	2.78952	0.00402269	0.00402269	5.88977	5.48133	0.11969	5	0	0	0	0	0	0	0	0	0	0	0	0	0	0	0	0	0	0	0	0	0	0	0	0	0	0	0	0	0	0	0	0	0	0	0	0	0	0	0
simsample201	-48.25	4448380	3.33973	2.67462	0.00389468	0.00389468	5.60051	5.93058	0.0938732	5	0	0	0	0	0	0	0	0	0	0	0	0	0	0	0	0	0	0	0	0	0	0	0	0	0	0	0	0	0	0	0	0	0	0	0	0	0	0	0
simsample202	-51	4903940	3.37611	2.81626	0.00401067	0.00401067	5.5859	5.59983	0.115456	5	0	0	0	0	0	0	0	0	0	0	0	0	0	0	0	0	0	0	0	0	0	0	0	0	0	0	0	0	0	0	0	0	0	0	0	0	0	0	0
simsample203	-56.65	4515220	3.35591	2.70793	0.00393409	0.00393409	5.90618	5.92102	0.0998403	5	0	0	0	0	0	0	0	0	0	0	0	0	0	0	0	0	0	0	0	0	0	0	0	0	0	0	0	0	0	0	0	0	0	0	0	0	0	0	0
simsample204	-62.25	5487060	3.42195	2.50249	0.0040362	0.0040362	6.02796	5.78134	0.127956	5	0	0	0	0	0	0	0	0	0	0	0	0	0	0	0	0	0	0	0	0	0	0	0	0	0	0	0	0	0	0	0	0	0	0	0	0	0	0	0
simsample205	-59.9	5407390	3.42402	2.61579	0.00401512	0.00401512	6.07969	5.72924	0.117	5	0	0	0	0	0	0	0	0	0	0	0	0	0	0	0	0	0	0	0	0	0	0	0	0	0	0	0	0	0	0	0	0	0	0	0	0	0	0	0
simsample206	-50.95	4987230	3.40317	2.85465	0.00398526	0.00398526	5.81402	5.72726	0.102097	5	0	0	0	0	0	0	0	0	0	0	0	0	0	0	0	0	0	0	0	0	0	0	0	0	0	0	0	0	0	0	0	0	0	0	0	0	0	0	0
simsample207	-53.35	4795290	3.35541	2.84296	0.00403247	0.00403247	5.81858	5.57324	0.124942	5	0	0	0	0	0	0	0	0	0	0	0	0	0	0	0	0	0	0	0	0	0	0	0	0	0	0	0	0	0	0	0	0	0	0	0	0	0	0	0
simsample208	-50.25	4526500	3.36248	2.77935	0.00390849	0.00390849	5.75689	5.9281	0.091468	5	0	0	0	0	0	0	0	0	0	0	0	0	0	0	0	0	0	0	0	0	0	0	0	0	0	0	0	0	0	0	0	0	0	0	0	0	0	0	0
simsample209	-54.25	4320790	3.32834	2.81664	0.00396448	0.00396448	5.86063	5.89588	0.112288	5	0	0	0	0	0	0	0	0	0	0	0	0	0	0	0	0	0	0	0	0	0	0	0	0	0	0	0	0	0	0	0	0	0	0	0	0	0	0	0
simsample210	-53.3	4635220	3.3814	2.81951	0.00395106	0.00395106	5.78151	6	0.103399	5	0	0	0	0	0	0	0	0	0	0	0	0	0	0	0	0	0	0	0	0	0	0	0	0	0	0	0	0	0	0	0	0	0	0	0	0	0	0	0
simsample211	-47.35	4451420	3.33357	2.77498	0.00388437	0.00388437	5.83566	5.83723	0.095286	5	0	0	0	0	0	0	0	0	0	0	0	0	0	0	0	0	0	0	0	0	0	0	0	0	0	0	0	0	0	0	0	0	0	0	0	0	0	0	0
simsample212	-50.9	4605190	3.37444	2.76721	0.0039048	0.0039048	5.84563	5.96421	0.0955033	5	0	0	0	0	0	0	0	0	0	0	0	0	0	0	0	0	0	0	0	0	0	0	0	0	0	0	0	0	0	0	0	0	0	0	0	0	0	0	0
simsample213	-50.55	5572690	3.41965	2.47662	0.00393697	0.00393697	5.81045	5.61797	0.102521	5	0	0	0	0	0	0	0	0	0	0	0	0	0	0	0	0	0	0	0	0	0	0	0	0	0	0	0	0	0	0	0	0	0	0	0	0	0	0	0
simsample214	-61.45	5424490	3.40738	2.56918	0.0040445	0.0040445	6.09558	5.67718	0.133132	5	0	0	0	0	0	0	0	0	0	0	0	0	0	0	0	0	0	0	0	0	0	0	0	0	0	0	0	0	0	0	0	0	0	0	0	0	0	0	0
simsample215	-49.05	4891810	3.36698	2.81407	0.00401067	0.00401067	5.58738	5.5931	0.120887	5	0	0	0	0	0	0	0	0	0	0	0	0	0	0	0	0	0	0	0	0	0	0	0	0	0	0	0	0	0	0	0	0	0	0	0	0	0	0	0
simsample216	-45.85	5041710	3.38161	2.60006	0.00385831	0.00385831	6.05323	5.82166	0.094178	5	0	0	0	0	0	0	0	0	0	0	0	0	0	0	0	0	0	0	0	0	0	0	0	0	0	0	0	0	0	0	0	0	0	0	0	0	0	0	0
simsample217	-52.45	4369250	3.33595	2.71372	0.00388719	0.00388719	5.96376	5.99087	0.0996322	5	0	0	0	0	0	0	0	0	0	0	0	0	0	0	0	0	0	0	0	0	0	0	0	0	0	0	0	0	0	0	0	0	0	0	0	0	0	0	0
simsample218	-49.05	4371510	3.34557	2.69329	0.00386893	0.00386893	5.64846	5.93778	0.0785792	5	0	0	0	0	0	0	0	0	0	0	0	0	0	0	0	0	0	0	0	0	0	0	0	0	0	0	0	0	0	0	0	0	0	0	0	0	0	0	0
simsample219	-48.85	4989640	3.39522	2.6456	0.00384124	0.00384124	6.01319	5.78993	0.0811121	5	0	0	0	0	0	0	0	0	0	0	0	0	0	0	0	0	0	0	0	0	0	0	0	0	0	0	0	0	0	0	0	0	0	0	0	0	0	0	0
simsample220	-60.8	5434950	3.42193	2.60341	0.00401512	0.00401512	6.07131	5.72185	0.123162	5	0	0	0	0	0	0	0	0	0	0	0	0	0	0	0	0	0	0	0	0	0	0	0	0	0	0	0	0	0	0	0	0	0	0	0	0	0	0	0
simsample221	-51.8	4478390	3.33852	2.71068	0.00392607	0.00392607	5.87034	5.93664	0.11031	5	0	0	0	0	0	0	0	0	0	0	0	0	0	0	0	0	0	0	0	0	0	0	0	0	0	0	0	0	0	0	0	0	0	0	0	0	0	0	0
simsample222	-53.7	4783270	3.37833	2.79306	0.00397457	0.00397457	5.8977	5.91838	0.118405	5	0	0	0	0	0	0	0	0	0	0	0	0	0	0	0	0	0	0	0	0	0	0	0	0	0	0	0	0	0	0	0	0	0	0	0	0	0	0	0
simsample223	-51	4395830	3.33325	2.76489	0.00391252	0.00391252	5.81635	5.82088	0.0975733	5	0	0	0	0	0	0	0	0	0	0	0	0	0	0	0	0	0	0	0	0	0	0	0	0	0	0	0	0	0	0	0	0	0	0	0	0	0	0	0
simsample224	-60.05	5666090	3.43311	2.45127	0.00401672	0.00401672	6.0458	5.88831	0.131374	5	0	0	0	0	0	0	0	0	0	0	0	0	0	0	0	0	0	0	0	0	0	0	0	0	0	0	0	0	0	0	0	0	0	0	0	0	0	0	0
simsample225	-59.65	5473400	3.42923	2.4911	0.00402428	0.00402428	5.91966	6.00661	0.131897	5	0	0	0	0	0	0	0	0	0	0	0	0	0	0	0	0	0	0	0	0	0	0	0	0	0	0	0	0	0	0	0	0	0	0	0	0	0	0	0
simsample226	-54.85	4714610	3.36386	2.81641	0.00398849	0.00398849	5.89819	5.62053	0.106416	5	0	0	0	0	0	0	0	0	0	0	0	0	0	0	0	0	0	0	0	0	0	0	0	0	0	0	0	0	0	0	0	0	0	0	0	0	0	0	0
simsample227	-52.65	4866760	3.35987	2.77428	0.00401005	0.00401005	5.85627	5.49699	0.11185	5	0	0	0	0	0	0	0	0	0	0	0	0	0	0	0	0	0	0	0	0	0	0	0	0	0	0	0	0	0	0	0	0	0	0	0	0	0	0	0
simsample228	-47.1	4502430	3.3769	2.7756	0.00384663	0.00384663	5.75694	6.24489	0.0876018	5	0	0	0	0	0	0	0	0	0	0	0	0	0	0	0	0	0	0	0	0	0	0	0	0	0	0	0	0	0	0	0	0	0	0	0	0	0	0	0
simsample229	-52.45	4604340	3.37809	2.7797	0.0039048	0.0039048	5.84249	5.96323	0.0930782	5	0	0	0	0	0	0	0	0	0	0	0	0	0	0	0	0	0	0	0	0	0	0	0	0	0	0	0	0	0	0	0	0	0	0	0	0	0	0	0
simsample230	-53.4	4384740	3.34241	2.74786	0.00391017	0.00391017	5.85124	5.89254	0.0957031	5	0	0	0	0	0	0	0	0	0	0	0	0	0	0	0	0	0	0	0	0	0	0	0	0	0	0	0	0	0	0	0	0	0	0	0	0	0	0	0
simsample231	-62.7	5530620	3.42782	2.53203	0.0040445	0.0040445	6.07517	5.75361	0.12636	5	0	0	0	0	0	0	0	0	0	0	0	0	0	0	0	0	0	0	0	0	0	0	0	0	0	0	0	0	0	0	0	0	0	0	0	0	0	0	0
simsample232	-51.55	5664160	3.43087	2.51841	0.00396596	0.00396596	5.90904	5.65871	0.110744	5	0	0	0	0	0	0	0	0	0	0	0	0	0	0	0	0	0	0	0	0	0	0	0	0	0	0	0	0	0	0	0	0	0	0	0	0	0	0	0
simsample233	-54.35	4224850	3.29733	2.76675	0.00394054	0.00394054	6.00986	5.73459	0.108683	5	0	0	0	0	0	0	0	0	0	0	0	0	0	0	0	0	0	0	0	0	0	0	0	0	0	0	0	0	0	0	0	0	0	0	0	0	0	0	0
simsample234	-48.8	5265620	3.41578	2.66257	0.00391472	0.00391472	6.04658	5.8134	0.100667	5	0	0	0	0	0	0	0	0	0	0	0	0	0	0	0	0	0	0	0	0	0	0	0	0	0	0	0	0	0	0	0	0	0	0	0	0	0	0	0
simsample235	-49.75	4451740	3.37705	2.83794	0.0038768	0.0038768	5.77171	6.03933	0.0767738	5	0	0	0	0	0	0	0	0	0	0	0	0	0	0	0	0	0	0	0	0	0	0	0	0	0	0	0	0	0	0	0	0	0	0	0	0	0	0	0
simsample236	-55.75	4429340	3.34172	2.65171	0.00394847	0.00394847	5.79004	5.95164	0.102335	5	0	0	0	0	0	0	0	0	0	0	0	0	0	0	0	0	0	0	0	0	0	0	0	0	0	0	0	0	0	0	0	0	0	0	0	0	0	0	0
simsample237	-52.8	4787890	3.35551	2.75385	0.00400944	0.00400944	5.74009	5.51732	0.110893	5	0	0	0	0	0	0	0	0	0	0	0	0	0	0	0	0	0	0	0	0	0	0	0	0	0	0	0	0	0	0	0	0	0	0	0	0	0	0	0
simsample238	-51.35	4365760	3.33505	2.7636	0.00391252	0.00391252	5.81641	5.82704	0.0909199	5	0	0	0	0	0	0	0	0	0	0	0	0	0	0	0	0	0	0	0	0	0	0	0	0	0	0	0	0	0	0	0	0	0	0	0	0	0	0	0
simsample239	-48.2	4420080	3.33192	2.78289	0.00388437	0.00388437	5.84868	5.84263	0.0981168	5	0	0	0	0	0	0	0	0	0	0	0	0	0	0	0	0	0	0	0	0	0	0	0	0	0	0	0	0	0	0	0	0	0	0	0	0	0	0	0
simsample240	-60.9	5349680	3.41609	2.47612	0.00403049	0.00403049	5.94841	5.87821	0.123869	5	0	0	0	0	0	0	0	0	0	0	0	0	0	0	0	0	0	0	0	0	0	0	0	0	0	0	0	0	0	0	0	0	0	0	0	0	0	0	0
simsample241	-52.05	4456110	3.35435	2.65444	0.00391788	0.00391788	5.55981	5.94064	0.0912839	5	0	0	0	0	0	0	0	0	0	0	0	0	0	0	0	0	0	0	0	0	0	0	0	0	0	0	0	0	0	0	0	0	0	0	0	0	0	0	0
simsample242	-52.75	4221810	3.31611	2.80582	0.00390935	0.00390935	6.02625	5.76686	0.0873907	5	0	0	0	0	0	0	0	0	0	0	0	0	0	0	0	0	0	0	0	0	0	0	0	0	0	0	0	0	0	0	0	0	0	0	0	0	0	0	0
simsample243	-58.65	4424250	3.33347	2.6579	0.00398536	0.00398536	5.8044	5.87448	0.113211	5	0	0	0	0	0	0	0	0	0	0	0	0	0	0	0	0	0	0	0	0	0	0	0	0	0	0	0	0	0	0	0	0	0	0	0	0	0	0	0
simsample244	-55.4	4779820	3.39053	2.80648	0.00397457	0.00397457	5.87219	5.83693	0.102264	5	0	0	0	0	0	0	0	0	0	0	0	0	0	0	0	0	0	0	0	0	0	0	0	0	0	0	0	0	0	0	0	0	0	0	0	0	0	0	0
simsample245	-53.55	4823690	3.38545	2.7947	0.00398355	0.00398355	5.79454	5.64672	0.094664	5	0	0	0	0	0	0	0	0	0	0	0	0	0	0	0	0	0	0	0	0	0	0	0	0	0	0	0	0	0	0	0	0	0	0	0	0	0	0	0
simsample246	-48.25	5139840	3.41645	2.64663	0.00387816	0.00387816	5.97853	5.97969	0.0918072	5	0	0	0	0	0	0	0	0	0	0	0	0	0	0	0	0	0	0	0	0	0	0	0	0	0	0	0	0	0	0	0	0	0	0	0	0	0	0	0
simsample247	-58.2	4437590	3.34881	2.72791	0.00393117	0.00393117	6.10946	5.94158	0.100961	5	0	0	0	0	0	0	0	0	0	0	0	0	0	0	0	0	0	0	0	0	0	0	0	0	0	0	0	0	0	0	0	0	0	0	0	0	0	0	0
simsample248	-51.45	4785790	3.34377	2.75669	0.00401374	0.00401374	5.76314	5.48546	0.118196	5	0	0	0	0	0	0	0	0	0	0	0	0	0	0	0	0	0	0	0	0	0	0	0	0	0	0	0	0	0	0	0	0	0	0	0	0	0	0	0
simsample249	-52.7	4234550	3.30123	2.80851	0.00392328	0.00392328	6.02058	5.67253	0.0974198	5	0	0	0	0	0	0	0	0	0	0	0	0	0	0	0	0	0	0	0	0	0	0	0	0	0	0	0	0	0	0	0	0	0	0	0	0	0	0	0
simsample250	-51.25	4194700	3.30206	2.79903	0.00390935	0.00390935	6.0171	5.75576	0.0920091	5	0	0	0	0	0	0	0	0	0	0	0	0	0	0	0	0	0	0	0	0	0	0	0	0	0	0	0	0	0	0	0	0	0	0	0	0	0	0	0
simsample251	-57.95	4180260	3.31448	2.80604	0.00394916	0.00394916	6.02454	5.87942	0.103377	5	0	0	0	0	0	0	0	0	0	0	0	0	0	0	0	0	0	0	0	0	0	0	0	0	0	0	0	0	0	0	0	0	0	0	0	0	0	0	0
simsample252	-46.3	4597010	3.36393	2.78568	0.00386747	0.00386747	5.73792	5.88944	0.08697	5	0	0	0	0	0	0	0	0	0	0	0	0	0	0	0	0	0	0	0	0	0	0	0	0	0	0	0	0	0	0	0	0	0	0	0	0	0	0	0
simsample253	-53.75	4153140	3.29903	2.7836	0.00392178	0.00392178	5.94019	5.65916	0.0903968	5	0	0	0	0	0	0	0	0	0	0	0	0	0	0	0	0	0	0	0	0	0	0	0	0	0	0	0	0	0	0	0	0	0	0	0	0	0	0	0
simsample254	-52.65	4243510	3.32224	2.75801	0.00393468	0.00393468	5.79651	5.98468	0.10622	5	0	0	0	0	0	0	0	0	0	0	0	0	0	0	0	0	0	0	0	0	0	0	0	0	0	0	0	0	0	0	0	0	0	0	0	0	0	0	0
simsample255	-56.85	4397000	3.33346	2.81026	0.00396448	0.00396448	5.97606	5.88251	0.117965	5	0	0	0	0	0	0	0	0	0	0	0	0	0	0	0	0	0	0	0	0	0	0	0	0	0	0	0	0	0	0	0	0	0	0	0	0	0	0	0
simsample256	-59.75	5428600	3.40041	2.43563	0.00403049	0.00403049	5.92451	5.82945	0.136706	5	0	0	0	0	0	0	0	0	0	0	0	0	0	0	0	0	0	0	0	0	0	0	0	0	0	0	0	0	0	0	0	0	0	0	0	0	0	0	0
simsample257	-52.55	4184700	3.31627	2.78826	0.00391545	0.00391545	5.98774	5.97053	0.101797	5	0	0	0	0	0	0	0	0	0	0	0	0	0	0	0	0	0	0	0	0	0	0	0	0	0	0	0	0	0	0	0	0	0	0	0	0	0	0	0
simsample258	-46.8	4479420	3.36499	2.80234	0.00385597	0.00385597	5.66783	5.97677	0.0804515	5	0	0	0	0	0	0	0	0	0	0	0	0	0	0	0	0	0	0	0	0	0	0	0	0	0	0	0	0	0	0	0	0	0	0	0	0	0	0	0
simsample259	-52.4	4921990	3.40849	2.82328	0.00395052	0.00395052	5.96565	5.89822	0.097232	5	0	0	0	0	0	0	0	0	0	0	0	0	0	0	0	0	0	0	0	0	0	0	0	0	0	0	0	0	0	0	0	0	0	0	0	0	0	0	0
simsample260	-54.55	5237370	3.40802	2.65667	0.00398355	0.00398355	6.10311	5.84068	0.118209	5	0	0	0	0	0	0	0	0	0	0	0	0	0	0	0	0	0	0	0	0	0	0	0	0	0	0	0	0	0	0	0	0	0	0	0	0	0	0	0
simsample261	-59.65	5502820	3.41867	2.56543	0.00401311	0.00401311	6.16784	5.71579	0.125989	5	0	0	0	0	0	0	0	0	0	0	0	0	0	0	0	0	0	0	0	0	0	0	0	0	0	0	0	0	0	0	0	0	0	0	0	0	0	0	0
simsample262	-55.25	4351350	3.33495	2.80758	0.00396448	0.00396448	5.8661	5.92476	0.111392	5	0	0	0	0	0	0	0	0	0	0	0	0	0	0	0	0	0	0	0	0	0	0	0	0	0	0	0	0	0	0	0	0	0	0	0	0	0	0	0
simsample263	-46.35	4430370	3.35648	2.80534	0.00385597	0.00385597	5.69969	5.94864	0.0782647	5	0	0	0	0	0	0	0	0	0	0	0	0	0	0	0	0	0	0	0	0	0	0	0	0	0	0	0	0	0	0	0	0	0	0	0	0	0	0	0
simsample264	-56.55	4415610	3.3309	2.75553	0.00396426	0.00396426	6.04794	5.9442	0.119117	5	0	0	0	0	0	0	0	0	0	0	0	0	0	0	0	0	0	0	0	0	0	0	0	0	0	0	0	0	0	0	0	0	0	0	0	0	0	0	0
simsample265	-50.55	4867580	3.40012	2.82469	0.00390887	0.00390887	5.95962	5.91129	0.0954324	5	0	0	0	0	0	0	0	0	0	0	0	0	0	0	0	0	0	0	0	0	0	0	0	0	0	0	0	0	0	0	0	0	0	0	0	0	0	0	0
simsample266	-56.6	4889530	3.37975	2.84349	0.00403555	0.00403555	5.85352	5.63542	0.11926	5	0	0	0	0	0	0	0	0	0	0	0	0	0	0	0	0	0	0	0	0	0	0	0	0	0	0	0	0	0	0	0	0	0	0	0	0	0	0	0
simsample267	-53.4	4864550	3.37619	2.85182	0.00403555	0.00403555	5.80932	5.63673	0.117767	5	0	0	0	0	0	0	0	0	0	0	0	0	0	0	0	0	0	0	0	0	0	0	0	0	0	0	0	0	0	0	0	0	0	0	0	0	0	0	0
simsample268	-50.35	4519480	3.36171	2.77844	0.00390849	0.00390849	5.74306	5.92287	0.0923019	5	0	0	0	0	0	0	0	0	0	0	0	0	0	0	0	0	0	0	0	0	0	0	0	0	0	0	0	0	0	0	0	0	0	0	0	0	0	0	0
simsample269	-57.1	4849650	3.37759	2.7985	0.00403194	0.00403194	5.79321	5.61671	0.110165	5	0	0	0	0	0	0	0	0	0	0	0	0	0	0	0	0	0	0	0	0	0	0	0	0	0	0	0	0	0	0	0	0	0	0	0	0	0	0	0
simsample270	-47.5	4619300	3.38087	2.77606	0.00386747	0.00386747	5.68547	5.88031	0.0732255	5	0	0	0	0	0	0	0	0	0	0	0	0	0	0	0	0	0	0	0	0	0	0	0	0	0	0	0	0	0	0	0	0	0	0	0	0	0	0	0
simsample271	-54.55	4840310	3.35428	2.81368	0.00405626	0.00405626	5.76596	5.37801	0.115851	5	0	0	0	0	0	0	0	0	0	0	0	0	0	0	0	0	0	0	0	0	0	0	0	0	0	0	0	0	0	0	0	0	0	0	0	0	0	0	0
simsample272	-53.55	4150890	3.29531	2.77955	0.00395078	0.00395078	6.05343	5.88279	0.109222	5	0	0	0	0	0	0	0	0	0	0	0	0	0	0	0	0	0	0	0	0	0	0	0	0	0	0	0	0	0	0	0	0	0	0	0	0	0	0	0
simsample273	-54.5	4793630	3.38231	2.80549	0.0039701	0.0039701	5.79791	5.74849	0.10543	5	0	0	0	0	0	0	0	0	0	0	0	0	0	0	0	0	0	0	0	0	0	0	0	0	0	0	0	0	0	0	0	0	0	0	0	0	0	0	0
simsample274	-55.4	4447260	3.35916	2.83087	0.00398969	0.00398969	5.68987	5.8982	0.104204	5	0	0	0	0	0	0	0	0	0	0	0	0	0	0	0	0	0	0	0	0	0	0	0	0	0	0	0	0	0	0	0	0	0	0	0	0	0	0	0
simsample275	-49.95	4319830	3.29959	2.67182	0.00394142	0.00394142	5.61977	5.65049	0.103332	5	0	0	0	0	0	0	0	0	0	0	0	0	0	0	0	0	0	0	0	0	0	0	0	0	0	0	0	0	0	0	0	0	0	0	0	0	0	0	0
simsample276	-59.7	4755440	3.3533	2.76547	0.00406406	0.00406406	5.82714	5.51561	0.121079	5	0	0	0	0	0	0	0	0	0	0	0	0	0	0	0	0	0	0	0	0	0	0	0	0	0	0	0	0	0	0	0	0	0	0	0	0	0	0	0
simsample277	-50.75	4292300	3.30084	2.7588	0.00388694	0.00388694	6.09949	5.703	0.0954138	5	0	0	0	0	0	0	0	0	0	0	0	0	0	0	0	0	0	0	0	0	0	0	0	0	0	0	0	0	0	0	0	0	0	0	0	0	0	0	0
simsample278	-50.65	4381500	3.36163	2.81909	0.00388714	0.00388714	5.77797	6.12585	0.0930902	5	0	0	0	0	0	0	0	0	0	0	0	0	0	0	0	0	0	0	0	0	0	0	0	0	0	0	0	0	0	0	0	0	0	0	0	0	0	0	0
simsample279	-50.3	4405540	3.33543	2.7861	0.00390962	0.00390962	5.94026	5.84568	0.0943596	5	0	0	0	0	0	0	0	0	0	0	0	0	0	0	0	0	0	0	0	0	0	0	0	0	0	0	0	0	0	0	0	0	0	0	0	0	0	0	0
simsample280	-50.15	4485470	3.37388	2.79698	0.0038768	0.0038768	5.84843	6.10734	0.0849807	5	0	0	0	0	0	0	0	0	0	0	0	0	0	0	0	0	0	0	0	0	0	0	0	0	0	0	0	0	0	0	0	0	0	0	0	0	0	0	0
simsample281	-52.65	4252680	3.294	2.75686	0.00392139	0.00392139	6.1215	5.73715	0.108726	5	0	0	0	0	0	0	0	0	0	0	0	0	0	0	0	0	0	0	0	0	0	0	0	0	0	0	0	0	0	0	0	0	0	0	0	0	0	0	0
simsample282	-51.2	5114610	3.40693	2.60579	0.0038709	0.0038709	6.13744	5.97576	0.0974445	5	0	0	0	0	0	0	0	0	0	0	0	0	0	0	0	0	0	0	0	0	0	0	0	0	0	0	0	0	0	0	0	0	0	0	0	0	0	0	0
simsample283	-58.15	4175140	3.31592	2.79325	0.00394916	0.00394916	6.01702	5.88621	0.101312	5	0	0	0	0	0	0	0	0	0	0	0	0	0	0	0	0	0	0	0	0	0	0	0	0	0	0	0	0	0	0	0	0	0	0	0	0	0	0	0
simsample284	-59.8	5627380	3.43421	2.45709	0.00401672	0.00401672	6.03189	5.87533	0.123898	5	0	0	0	0	0	0	0	0	0	0	0	0	0	0	0	0	0	0	0	0	0	0	0	0	0	0	0	0	0	0	0	0	0	0	0	0	0	0	0
simsample285	-50.45	5007540	3.40894	2.88972	0.00399423	0.00399423	5.66481	5.70745	0.106975	5	0	0	0	0	0	0	0	0	0	0	0	0	0	0	0	0	0	0	0	0	0	0	0	0	0	0	0	0	0	0	0	0	0	0	0	0	0	0	0
simsample286	-59.8	5543680	3.42871	2.47026	0.00402428	0.00402428	5.95806	5.92756	0.130334	5	0	0	0	0	0	0	0	0	0	0	0	0	0	0	0	0	0	0	0	0	0	0	0	0	0	0	0	0	0	0	0	0	0	0	0	0	0	0	0
simsample287	-58.05	4772290	3.39744	2.79575	0.00396518	0.00396518	6.0332	5.9865	0.104119	5	0	0	0	0	0	0	0	0	0	0	0	0	0	0	0	0	0	0	0	0	0	0	0	0	0	0	0	0	0	0	0	0	0	0	0	0	0	0	0
simsample288	-51.4	5667860	3.42802	2.50895	0.00396723	0.00396723	5.89169	5.6441	0.109114	5	0	0	0	0	0	0	0	0	0	0	0	0	0	0	0	0	0	0	0	0	0	0	0	0	0	0	0	0	0	0	0	0	0	0	0	0	0	0	0
simsample289	-46.6	4387240	3.33203	2.71404	0.00387044	0.00387044	5.60778	5.95036	0.0935372	5	0	0	0	0	0	0	0	0	0	0	0	0	0	0	0	0	0	0	0	0	0	0	0	0	0	0	0	0	0	0	0	0	0	0	0	0	0	0	0
simsample290	-49	4556450	3.35343	2.7438	0.00388585	0.00388585	5.84506	5.85907	0.0931509	5	0	0	0	0	0	0	0	0	0	0	0	0	0	0	0	0	0	0	0	0	0	0	0	0	0	0	0	0	0	0	0	0	0	0	0	0	0	0	0
simsample291	-57.6	4265160	3.31042	2.74049	0.00392139	0.00392139	6.17325	5.79441	0.102993	5	0	0	0	0	0	0	0	0	0	0	0	0	0	0	0	0	0	0	0	0	0	0	0	0	0	0	0	0	0	0	0	0	0	0	0	0	0	0	0
simsample292	-57.75	4892070	3.41253	2.90317	0.00402296	0.00402296	5.72862	5.84627	0.108445	5	0	0	0	0	0	0	0	0	0	0	0	0	0	0	0	0	0	0	0	0	0	0	0	0	0	0	0	0	0	0	0	0	0	0	0	0	0	0	0
simsample293	-49.85	4527650	3.35999	2.805	0.00391082	0.00391082	5.75247	5.90457	0.0960478	5	0	0	0	0	0	0	0	0	0	0	0	0	0	0	0	0	0	0	0	0	0	0	0	0	0	0	0	0	0	0	0	0	0	0	0	0	0	0	0
simsample294	-61.75	5615510	3.4206	2.47641	0.00402413	0.00402413	6.11317	5.67468	0.127037	5	0	0	0	0	0	0	0	0	0	0	0	0	0	0	0	0	0	0	0	0	0	0	0	0	0	0	0	0	0	0	0	0	0	0	0	0	0	0	0
simsample295	-55.55	4375220	3.35133	2.82171	0.00395082	0.00395082	5.78926	6.041	0.109525	5	0	0	0	0	0	0	0	0	0	0	0	0	0	0	0	0	0	0	0	0	0	0	0	0	0	0	0	0	0	0	0	0	0	0	0	0	0	0	0
simsample296	-47.65	4410840	3.33447	2.77791	0.00389888	0.00389888	5.65347	5.88952	0.0988194	5	0	0	0	0	0	0	0	0	0	0	0	0	0	0	0	0	0	0	0	0	0	0	0	0	0	0	0	0	0	0	0	0	0	0	0	0	0	0	0
simsample297	-54.2	4753980	3.35907	2.82305	0.00402651	0.00402651	5.81563	5.54614	0.113242	5	0	0	0	0	0	0	0	0	0	0	0	0	0	0	0	0	0	0	0	0	0	0	0	0	0	0	0	0	0	0	0	0	0	0	0	0	0	0	0
simsample298	-47.6	4395670	3.33053	2.78673	0.00389185	0.00389185	5.66985	5.86756	0.100416	5	0	0	0	0	0	0	0	0	0	0	0	0	0	0	0	0	0	0	0	0	0	0	0	0	0	0	0	0	0	0	0	0	0	0	0	0	0	0	0
simsample299	-60.85	5453230	3.43189	2.46863	0.00402428	0.00402428	5.88123	6.0106	0.126783	5	0	0	0	0	0	0	0	0	0	0	0	0	0	0	0	0	0	0	0	0	0	0	0	0	0	0	0	0	0	0	0	0	0	0	0	0	0	0	0
simsample300	-50.8	4433490	3.35369	2.6979	0.00388718	0.00388718	5.73325	6.13278	0.0984729	5	0	0	0	0	0	0	0	0	0	0	0	0	0	0	0	0	0	0	0	0	0	0	0	0	0	0	0	0	0	0	0	0	0	0	0	0	0	0	0
simsample301	-53.45	5435010	3.43679	2.67643	0.00395988	0.00395988	5.96446	5.71884	0.0991411	5	0	0	0	0	0	0	0	0	0	0	0	0	0	0	0	0	0	0	0	0	0	0	0	0	0	0	0	0	0	0	0	0	0	0	0	0	0	0	0
simsample302	-56.25	4220770	3.30721	2.82302	0.00394785	0.00394785	5.93244	5.7556	0.107194	5	0	0	0	0	0	0	0	0	0	0	0	0	0	0	0	0	0	0	0	0	0	0	0	0	0	0	0	0	0	0	0	0	0	0	0	0	0	0	0
simsample303	-49.7	4362130	3.33947	2.7795	0.00389748	0.00389748	5.86251	6.10109	0.109079	5	0	0	0	0	0	0	0	0	0	0	0	0	0	0	0	0	0	0	0	0	0	0	0	0	0	0	0	0	0	0	0	0	0	0	0	0	0	0	0
simsample304	-51.45	4413930	3.33402	2.73494	0.00390276	0.00390276	5.86461	5.85316	0.0971496	5	0	0	0	0	0	0	0	0	0	0	0	0	0	0	0	0	0	0	0	0	0	0	0	0	0	0	0	0	0	0	0	0	0	0	0	0	0	0	0
simsample305	-47.55	4357110	3.3523	2.8093	0.00385628	0.00385628	5.69716	5.96702	0.0767613	5	0	0	0	0	0	0	0	0	0	0	0	0	0	0	0	0	0	0	0	0	0	0	0	0	0	0	0	0	0	0	0	0	0	0	0	0	0	0	0
simsample306	-53.1	5696350	3.43126	2.4847	0.00396723	0.00396723	5.88989	5.61389	0.107524	5	0	0	0	0	0	0	0	0	0	0	0	0	0	0	0	0	0	0	0	0	0	0	0	0	0	0	0	0	0	0	0	0	0	0	0	0	0	0	0
simsample307	-51.5	5348250	3.44364	2.7197	0.00391708	0.00391708	6.0635	5.89511	0.0918783	5	0	0	0	0	0	0	0	0	0	0	0	0	0	0	0	0	0	0	0	0	0	0	0	0	0	0	0	0	0	0	0	0	0	0	0	0	0	0	0
simsample308	-51	4321960	3.33678	2.80345	0.00389786	0.00389786	5.76669	5.86176	0.0893651	5	0	0	0	0	0	0	0	0	0	0	0	0	0	0	0	0	0	0	0	0	0	0	0	0	0	0	0	0	0	0	0	0	0	0	0	0	0	0	0
simsample309	-52.3	4406640	3.35617	2.83469	0.0039053	0.0039053	6.05644	6.10413	0.105164	5	0	0	0	0	0	0	0	0	0	0	0	0	0	0	0	0	0	0	0	0	0	0	0	0	0	0	0	0	0	0	0	0	0	0	0	0	0	0	0
simsample310	-60.75	5464320	3.4183	2.59017	0.0040481	0.0040481	6.05341	5.71965	0.128672	5	0	0	0	0	0	0	0	0	0	0	0	0	0	0	0	0	0	0	0	0	0	0	0	0	0	0	0	0	0	0	0	0	0	0	0	0	0	0	0
simsample311	-48.3	4327650	3.32903	2.79943	0.00389786	0.00389786	5.76585	5.84247	0.0919223	5	0	0	0	0	0	0	0	0	0	0	0	0	0	0	0	0	0	0	0	0	0	0	0	0	0	0	0	0	0	0	0	0	0	0	0	0	0	0	0
simsample312	-49.8	5588750	3.42546	2.48914	0.00395068	0.00395068	5.82676	5.67213	0.103091	5	0	0	0	0	0	0	0	0	0	0	0	0	0	0	0	0	0	0	0	0	0	0	0	0	0	0	0	0	0	0	0	0	0	0	0	0	0	0	0
simsample313	-53.1	4200900	3.30201	2.79629	0.00392328	0.00392328	5.98241	5.64371	0.0964651	5	0	0	0	0	0	0	0	0	0	0	0	0	0	0	0	0	0	0	0	0	0	0	0	0	0	0	0	0	0	0	0	0	0	0	0	0	0	0	0
simsample314	-49.4	4468870	3.3441	2.65544	0.00391788	0.00391788	5.55911	5.88085	0.0953127	5	0	0	0	0	0	0	0	0	0	0	0	0	0	0	0	0	0	0	0	0	0	0	0	0	0	0	0	0	0	0	0	0	0	0	0	0	0	0	0
simsample315	-49.35	4498080	3.36989	2.82519	0.0038768	0.0038768	5.81778	6.05261	0.0893426	5	0	0	0	0	0	0	0	0	0	0	0	0	0	0	0	0	0	0	0	0	0	0	0	0	0	0	0	0	0	0	0	0	0	0	0	0	0	0	0
simsample316	-52.3	4392910	3.33689	2.79643	0.00390962	0.00390962	5.94026	5.84927	0.0973435	5	0	0	0	0	0	0	0	0	0	0	0	0	0	0	0	0	0	0	0	0	0	0	0	0	0	0	0	0	0	0	0	0	0	0	0	0	0	0	0
simsample317	-51.35	4317130	3.33941	2.80484	0.00389786	0.00389786	5.76043	5.86355	0.0901017	5	0	0	0	0	0	0	0	0	0	0	0	0	0	0	0	0	0	0	0	0	0	0	0	0	0	0	0	0	0	0	0	0	0	0	0	0	0	0	0
simsample318	-52.25	4807340	3.34892	2.76752	0.00400665	0.00400665	5.76967	5.48763	0.117856	5	0	0	0	0	0	0	0	0	0	0	0	0	0	0	0	0	0	0	0	0	0	0	0	0	0	0	0	0	0	0	0	0	0	0	0	0	0	0	0
simsample319	-56.4	4157470	3.30297	2.82857	0.00394785	0.00394785	6.01964	5.74186	0.0993732	5	0	0	0	0	0	0	0	0	0	0	0	0	0	0	0	0	0	0	0	0	0	0	0	0	0	0	0	0	0	0	0	0	0	0	0	0	0	0	0
simsample320	-51.95	4863160	3.35671	2.76856	0.00400665	0.00400665	5.85129	5.48339	0.113105	5	0	0	0	0	0	0	0	0	0	0	0	0	0	0	0	0	0	0	0	0	0	0	0	0	0	0	0	0	0	0	0	0	0	0	0	0	0	0	0
simsample321	-52.85	4416280	3.35968	2.8061	0.00393909	0.00393909	5.79096	6.11883	0.106089	5	0	0	0	0	0	0	0	0	0	0	0	0	0	0	0	0	0	0	0	0	0	0	0	0	0	0	0	0	0	0	0	0	0	0	0	0	0	0	0
simsample322	-51.95	5638010	3.42324	2.49136	0.00397219	0.00397219	5.88722	5.62005	0.109308	5	0	0	0	0	0	0	0	0	0	0	0	0	0	0	0	0	0	0	0	0	0	0	0	0	0	0	0	0	0	0	0	0	0	0	0	0	0	0	0
simsample323	-51.1	4410330	3.33306	2.74301	0.00390276	0.00390276	5.88053	5.83997	0.0977596	5	0	0	0	0	0	0	0	0	0	0	0	0	0	0	0	0	0	0	0	0	0	0	0	0	0	0	0	0	0	0	0	0	0	0	0	0	0	0	0
simsample324	-51.55	5030560	3.39352	2.61985	0.0038684	0.0038684	6.14292	5.80432	0.0894816	5	0	0	0	0	0	0	0	0	0	0	0	0	0	0	0	0	0	0	0	0	0	0	0	0	0	0	0	0	0	0	0	0	0	0	0	0	0	0	0
simsample325	-52	5063500	3.39846	2.59824	0.0038596	0.0038596	6.25913	5.95776	0.0980507	5	0	0	0	0	0	0	0	0	0	0	0	0	0	0	0	0	0	0	0	0	0	0	0	0	0	0	0	0	0	0	0	0	0	0	0	0	0	0	0
simsample326	-51.6	4558040	3.34722	2.74549	0.00393107	0.00393107	5.79165	5.82452	0.10627	5	0	0	0	0	0	0	0	0	0	0	0	0	0	0	0	0	0	0	0	0	0	0	0	0	0	0	0	0	0	0	0	0	0	0	0	0	0	0	0
simsample327	-47.3	4344220	3.34752	2.80452	0.00387445	0.00387445	5.631	5.98686	0.0826899	5	0	0	0	0	0	0	0	0	0	0	0	0	0	0	0	0	0	0	0	0	0	0	0	0	0	0	0	0	0	0	0	0	0	0	0	0	0	0	0
simsample328	-49.45	5328370	3.42674	2.71101	0.0039193	0.0039193	6.05665	5.80234	0.0959577	5	0	0	0	0	0	0	0	0	0	0	0	0	0	0	0	0	0	0	0	0	0	0	0	0	0	0	0	0	0	0	0	0	0	0	0	0	0	0	0
simsample329	-52.6	4773150	3.35398	2.81738	0.00403247	0.00403247	5.7978	5.56239	0.118516	5	0	0	0	0	0	0	0	0	0	0	0	0	0	0	0	0	0	0	0	0	0	0	0	0	0	0	0	0	0	0	0	0	0	0	0	0	0	0	0
simsample330	-48.55	4432630	3.33177	2.63527	0.00388998	0.00388998	5.64274	5.92449	0.0970073	5	0	0	0	0	0	0	0	0	0	0	0	0	0	0	0	0	0	0	0	0	0	0	0	0	0	0	0	0	0	0	0	0	0	0	0	0	0	0	0
simsample331	-49	4370140	3.35028	2.77151	0.00387021	0.00387021	5.65298	5.9726	0.084657	5	0	0	0	0	0	0	0	0	0	0	0	0	0	0	0	0	0	0	0	0	0	0	0	0	0	0	0	0	0	0	0	0	0	0	0	0	0	0	0
simsample332	-47.55	4425930	3.33199	2.6434	0.00388998	0.00388998	5.62356	5.91713	0.0921836	5	0	0	0	0	0	0	0	0	0	0	0	0	0	0	0	0	0	0	0	0	0	0	0	0	0	0	0	0	0	0	0	0	0	0	0	0	0	0	0
simsample333	-52.1	4367430	3.33974	2.72266	0.00392706	0.00392706	5.76066	6.00627	0.102423	5	0	0	0	0	0	0	0	0	0	0	0	0	0	0	0	0	0	0	0	0	0	0	0	0	0	0	0	0	0	0	0	0	0	0	0	0	0	0	0
simsample334	-56.2	4482880	3.33655	2.64949	0.0039914	0.0039914	5.71151	5.85647	0.113589	5	0	0	0	0	0	0	0	0	0	0	0	0	0	0	0	0	0	0	0	0	0	0	0	0	0	0	0	0	0	0	0	0	0	0	0	0	0	0	0
simsample335	-47.15	4975260	3.38486	2.62328	0.0038431	0.0038431	5.98734	5.8411	0.0880263	5	0	0	0	0	0	0	0	0	0	0	0	0	0	0	0	0	0	0	0	0	0	0	0	0	0	0	0	0	0	0	0	0	0	0	0	0	0	0	0
simsample336	-56.15	4512010	3.35365	2.76068	0.00398532	0.00398532	5.76542	6.02784	0.121769	5	0	0	0	0	0	0	0	0	0	0	0	0	0	0	0	0	0	0	0	0	0	0	0	0	0	0	0	0	0	0	0	0	0	0	0	0	0	0	0
simsample337	-52.45	4770620	3.34733	2.76375	0.00401374	0.00401374	5.74957	5.49515	0.117026	5	0	0	0	0	0	0	0	0	0	0	0	0	0	0	0	0	0	0	0	0	0	0	0	0	0	0	0	0	0	0	0	0	0	0	0	0	0	0	0
simsample338	-53.6	4752530	3.35203	2.81678	0.00402651	0.00402651	5.82036	5.51711	0.118119	5	0	0	0	0	0	0	0	0	0	0	0	0	0	0	0	0	0	0	0	0	0	0	0	0	0	0	0	0	0	0	0	0	0	0	0	0	0	0	0
simsample339	-57.35	4864200	3.361	2.82064	0.00403627	0.00403627	5.92166	5.52047	0.123798	5	0	0	0	0	0	0	0	0	0	0	0	0	0	0	0	0	0	0	0	0	0	0	0	0	0	0	0	0	0	0	0	0	0	0	0	0	0	0	0
simsample340	-50.8	4358600	3.33514	2.74264	0.00391017	0.00391017	5.84044	5.89881	0.0938332	5	0	0	0	0	0	0	0	0	0	0	0	0	0	0	0	0	0	0	0	0	0	0	0	0	0	0	0	0	0	0	0	0	0	0	0	0	0	0	0
simsample341	-51.45	4895100	3.39373	2.78405	0.00394941	0.00394941	5.88531	5.91309	0.108518	5	0	0	0	0	0	0	0	0	0	0	0	0	0	0	0	0	0	0	0	0	0	0	0	0	0	0	0	0	0	0	0	0	0	0	0	0	0	0	0
simsample342	-57.6	5406660	3.40065	2.60524	0.00401487	0.00401487	6.1643	5.69537	0.131471	5	0	0	0	0	0	0	0	0	0	0	0	0	0	0	0	0	0	0	0	0	0	0	0	0	0	0	0	0	0	0	0	0	0	0	0	0	0	0	0
simsample343	-52.3	4949280	3.40672	2.76798	0.00393502	0.00393502	5.92528	5.85752	0.0949426	5	0	0	0	0	0	0	0	0	0	0	0	0	0	0	0	0	0	0	0	0	0	0	0	0	0	0	0	0	0	0	0	0	0	0	0	0	0	0	0
simsample344	-52	4425790	3.3413	2.70781	0.00388719	0.00388719	5.92768	5.92883	0.093511	5	0	0	0	0	0	0	0	0	0	0	0	0	0	0	0	0	0	0	0	0	0	0	0	0	0	0	0	0	0	0	0	0	0	0	0	0	0	0	0
simsample345	-54.05	4280380	3.31557	2.81018	0.00395162	0.00395162	5.99841	5.94714	0.121002	5	0	0	0	0	0	0	0	0	0	0	0	0	0	0	0	0	0	0	0	0	0	0	0	0	0	0	0	0	0	0	0	0	0	0	0	0	0	0	0
simsample346	-50.55	4413520	3.33902	2.70637	0.00388312	0.00388312	5.9912	5.99758	0.0940535	5	0	0	0	0	0	0	0	0	0	0	0	0	0	0	0	0	0	0	0	0	0	0	0	0	0	0	0	0	0	0	0	0	0	0	0	0	0	0	0
simsample347	-54.1	4426820	3.33827	2.65771	0.00394847	0.00394847	5.79639	5.96764	0.106095	5	0	0	0	0	0	0	0	0	0	0	0	0	0	0	0	0	0	0	0	0	0	0	0	0	0	0	0	0	0	0	0	0	0	0	0	0	0	0	0
simsample348	-56.05	4756940	3.35866	2.84162	0.00404514	0.00404514	5.81434	5.66599	0.128875	5	0	0	0	0	0	0	0	0	0	0	0	0	0	0	0	0	0	0	0	0	0	0	0	0	0	0	0	0	0	0	0	0	0	0	0	0	0	0	0
simsample349	-43.6	4594040	3.35731	2.74804	0.0038218	0.0038218	5.67106	5.90253	0.0811148	5	0	0	0	0	0	0	0	0	0	0	0	0	0	0	0	0	0	0	0	0	0	0	0	0	0	0	0	0	0	0	0	0	0	0	0	0	0	0	0
simsample350	-49.85	4326130	3.30227	2.68236	0.00394142	0.00394142	5.57996	5.70982	0.107762	5	0	0	0	0	0	0	0	0	0	0	0	0	0	0	0	0	0	0	0	0	0	0	0	0	0	0	0	0	0	0	0	0	0	0	0	0	0	0	0
simsample351	-52.8	4401060	3.33969	2.7495	0.00391017	0.00391017	5.84451	5.89574	0.0931057	5	0	0	0	0	0	0	0	0	0	0	0	0	0	0	0	0	0	0	0	0	0	0	0	0	0	0	0	0	0	0	0	0	0	0	0	0	0	0	0
simsample352	-54.95	4193740	3.31886	2.79013	0.00391545	0.00391545	6.01263	5.9717	0.0996186	5	0	0	0	0	0	0	0	0	0	0	0	0	0	0	0	0	0	0	0	0	0	0	0	0	0	0	0	0	0	0	0	0	0	0	0	0	0	0	0
simsample353	-51.2	4397080	3.32744	2.76398	0.00391036	0.00391036	5.96187	5.83923	0.0990983	5	0	0	0	0	0	0	0	0	0	0	0	0	0	0	0	0	0	0	0	0	0	0	0	0	0	0	0	0	0	0	0	0	0	0	0	0	0	0	0
simsample354	-53.55	4854940	3.40016	2.91125	0.00401591	0.00401591	5.72758	5.8263	0.1109	5	0	0	0	0	0	0	0	0	0	0	0	0	0	0	0	0	0	0	0	0	0	0	0	0	0	0	0	0	0	0	0	0	0	0	0	0	0	0	0
simsample355	-52.1	4744410	3.37986	2.81512	0.0039701	0.0039701	5.77284	5.752	0.0998692	5	0	0	0	0	0	0	0	0	0	0	0	0	0	0	0	0	0	0	0	0	0	0	0	0	0	0	0	0	0	0	0	0	0	0	0	0	0	0	0
simsample356	-50	4356090	3.33386	2.79486	0.00389786	0.00389786	5.78316	5.83857	0.091819	5	0	0	0	0	0	0	0	0	0	0	0	0	0	0	0	0	0	0	0	0	0	0	0	0	0	0	0	0	0	0	0	0	0	0	0	0	0	0	0
simsample357	-60.9	5470930	3.41636	2.4977	0.0040362	0.0040362	6.04694	5.77314	0.127866	5	0	0	0	0	0	0	0	0	0	0	0	0	0	0	0	0	0	0	0	0	0	0	0	0	0	0	0	0	0	0	0	0	0	0	0	0	0	0	0
simsample358	-55.15	4360640	3.33365	2.81963	0.00396448	0.00396448	5.92375	5.92651	0.115709	5	0	0	0	0	0	0	0	0	0	0	0	0	0	0	0	0	0	0	0	0	0	0	0	0	0	0	0	0	0	0	0	0	0	0	0	0	0	0	0
simsample359	-48.95	4461360	3.38407	2.75258	0.00384948	0.00384948	5.73587	6.26888	0.0767953	5	0	0	0	0	0	0	0	0	0	0	0	0	0	0	0	0	0	0	0	0	0	0	0	0	0	0	0	0	0	0	0	0	0	0	0	0	0	0	0
simsample360	-53.5	4771900	3.34629	2.74513	0.00400665	0.00400665	5.78735	5.47555	0.11537	5	0	0	0	0	0	0	0	0	0	0	0	0	0	0	0	0	0	0	0	0	0	0	0	0	0	0	0	0	0	0	0	0	0	0	0	0	0	0	0
simsample361	-54.8	4838130	3.36041	2.80014	0.00403627	0.00403627	5.86221	5.49251	0.115395	5	0	0	0	0	0	0	0	0	0	0	0	0	0	0	0	0	0	0	0	0	0	0	0	0	0	0	0	0	0	0	0	0	0	0	0	0	0	0	0
simsample362	-52.3	4478390	3.33887	2.70753	0.00392607	0.00392607	5.87767	5.94086	0.11031	5	0	0	0	0	0	0	0	0	0	0	0	0	0	0	0	0	0	0	0	0	0	0	0	0	0	0	0	0	0	0	0	0	0	0	0	0	0	0	0
simsample363	-48.9	4343160	3.34124	2.8144	0.00389185	0.00389185	5.63922	5.85097	0.0855227	5	0	0	0	0	0	0	0	0	0	0	0	0	0	0	0	0	0	0	0	0	0	0	0	0	0	0	0	0	0	0	0	0	0	0	0	0	0	0	0
simsample364	-47	4479510	3.36029	2.79928	0.00385597	0.00385597	5.67684	5.97831	0.0815766	5	0	0	0	0	0	0	0	0	0	0	0	0	0	0	0	0	0	0	0	0	0	0	0	0	0	0	0	0	0	0	0	0	0	0	0	0	0	0	0
simsample365	-52.3	4227400	3.31512	2.79701	0.00390596	0.00390596	6.02149	5.76242	0.0864192	5	0	0	0	0	0	0	0	0	0	0	0	0	0	0	0	0	0	0	0	0	0	0	0	0	0	0	0	0	0	0	0	0	0	0	0	0	0	0	0
simsample366	-56.8	4446300	3.37096	2.79728	0.00390179	0.00390179	6.00632	6.13028	0.0965888	5	0	0	0	0	0	0	0	0	0	0	0	0	0	0	0	0	0	0	0	0	0	0	0	0	0	0	0	0	0	0	0	0	0	0	0	0	0	0	0
simsample367	-51.4	4427100	3.33661	2.75587	0.00389997	0.00389997	5.96594	5.79255	0.0913029	5	0	0	0	0	0	0	0	0	0	0	0	0	0	0	0	0	0	0	0	0	0	0	0	0	0	0	0	0	0	0	0	0	0	0	0	0	0	0	0
simsample368	-53.55	4602330	3.3739	2.78953	0.00395106	0.00395106	5.82302	6.01023	0.105719	5	0	0	0	0	0	0	0	0	0	0	0	0	0	0	0	0	0	0	0	0	0	0	0	0	0	0	0	0	0	0	0	0	0	0	0	0	0	0	0
simsample369	-49.75	4342380	3.32805	2.79764	0.00389786	0.00389786	5.78393	5.83231	0.0963856	5	0	0	0	0	0	0	0	0	0	0	0	0	0	0	0	0	0	0	0	0	0	0	0	0	0	0	0	0	0	0	0	0	0	0	0	0	0	0	0
simsample370	-52.7	4391980	3.34022	2.69523	0.00388312	0.00388312	5.96203	5.93819	0.0913968	5	0	0	0	0	0	0	0	0	0	0	0	0	0	0	0	0	0	0	0	0	0	0	0	0	0	0	0	0	0	0	0	0	0	0	0	0	0	0	0
simsample371	-57.85	5261570	3.42425	2.68389	0.00395988	0.00395988	6.08834	5.78889	0.105331	5	0	0	0	0	0	0	0	0	0	0	0	0	0	0	0	0	0	0	0	0	0	0	0	0	0	0	0	0	0	0	0	0	0	0	0	0	0	0	0
simsample372	-61.65	5382910	3.42202	2.48788	0.00403049	0.00403049	5.95235	5.95232	0.12823	5	0	0	0	0	0	0	0	0	0	0	0	0	0	0	0	0	0	0	0	0	0	0	0	0	0	0	0	0	0	0	0	0	0	0	0	0	0	0	0
simsample373	-53.2	4839510	3.38324	2.79025	0.00395354	0.00395354	6.08624	5.87226	0.109966	5	0	0	0	0	0	0	0	0	0	0	0	0	0	0	0	0	0	0	0	0	0	0	0	0	0	0	0	0	0	0	0	0	0	0	0	0	0	0	0
simsample374	-57.95	5256920	3.41627	2.71596	0.00398115	0.00398115	6.15353	5.79437	0.117298	5	0	0	0	0	0	0	0	0	0	0	0	0	0	0	0	0	0	0	0	0	0	0	0	0	0	0	0	0	0	0	0	0	0	0	0	0	0	0	0
simsample375	-52.85	4578900	3.36837	2.7625	0.003918	0.003918	5.8924	5.97384	0.0981531	5	0	0	0	0	0	0	0	0	0	0	0	0	0	0	0	0	0	0	0	0	0	0	0	0	0	0	0	0	0	0	0	0	0	0	0	0	0	0	0
simsample376	-49.85	5112430	3.42184	2.62831	0.00387512	0.00387512	5.9454	5.93644	0.0799431	5	0	0	0	0	0	0	0	0	0	0	0	0	0	0	0	0	0	0	0	0	0	0	0	0	0	0	0	0	0	0	0	0	0	0	0	0	0	0	0
simsample377	-51.45	4262790	3.30311	2.79774	0.00392328	0.00392328	6.03602	5.73635	0.102369	5	0	0	0	0	0	0	0	0	0	0	0	0	0	0	0	0	0	0	0	0	0	0	0	0	0	0	0	0	0	0	0	0	0	0	0	0	0	0	0
simsample378	-57.8	4365820	3.3391	2.81944	0.00396448	0.00396448	5.93658	5.92217	0.114682	5	0	0	0	0	0	0	0	0	0	0	0	0	0	0	0	0	0	0	0	0	0	0	0	0	0	0	0	0	0	0	0	0	0	0	0	0	0	0	0
simsample379	-50.05	4633070	3.36646	2.77289	0.00391638	0.00391638	5.88854	5.94021	0.0958837	5	0	0	0	0	0	0	0	0	0	0	0	0	0	0	0	0	0	0	0	0	0	0	0	0	0	0	0	0	0	0	0	0	0	0	0	0	0	0	0
simsample380	-53.05	4815650	3.34875	2.75342	0.00400665	0.00400665	5.76297	5.4735	0.119076	5	0	0	0	0	0	0	0	0	0	0	0	0	0	0	0	0	0	0	0	0	0	0	0	0	0	0	0	0	0	0	0	0	0	0	0	0	0	0	0
simsample381	-56.5	4387610	3.33162	2.81208	0.00396448	0.00396448	5.97191	5.87921	0.117423	5	0	0	0	0	0	0	0	0	0	0	0	0	0	0	0	0	0	0	0	0	0	0	0	0	0	0	0	0	0	0	0	0	0	0	0	0	0	0	0
simsample382	-53.2	4949640	3.39843	2.83138	0.0039877	0.0039877	5.82649	5.69858	0.103303	5	0	0	0	0	0	0	0	0	0	0	0	0	0	0	0	0	0	0	0	0	0	0	0	0	0	0	0	0	0	0	0	0	0	0	0	0	0	0	0
simsample383	-55.85	5260760	3.41244	2.67459	0.00398355	0.00398355	6.05835	5.82308	0.119028	5	0	0	0	0	0	0	0	0	0	0	0	0	0	0	0	0	0	0	0	0	0	0	0	0	0	0	0	0	0	0	0	0	0	0	0	0	0	0	0
simsample384	-46.05	4877810	3.37643	2.70986	0.00384124	0.00384124	6.04028	5.70504	0.0764449	5	0	0	0	0	0	0	0	0	0	0	0	0	0	0	0	0	0	0	0	0	0	0	0	0	0	0	0	0	0	0	0	0	0	0	0	0	0	0	0
simsample385	-53.3	4398310	3.33699	2.72291	0.00389605	0.00389605	6.07635	5.94666	0.101811	5	0	0	0	0	0	0	0	0	0	0	0	0	0	0	0	0	0	0	0	0	0	0	0	0	0	0	0	0	0	0	0	0	0	0	0	0	0	0	0
simsample386	-49.85	4426890	3.33968	2.76916	0.00391666	0.00391666	5.7534	5.86482	0.0979691	5	0	0	0	0	0	0	0	0	0	0	0	0	0	0	0	0	0	0	0	0	0	0	0	0	0	0	0	0	0	0	0	0	0	0	0	0	0	0	0
simsample387	-58	4429180	3.34761	2.74241	0.00394823	0.00394823	6.03199	5.97502	0.107186	5	0	0	0	0	0	0	0	0	0	0	0	0	0	0	0	0	0	0	0	0	0	0	0	0	0	0	0	0	0	0	0	0	0	0	0	0	0	0	0
simsample388	-55.3	4115160	3.29875	2.84005	0.00394916	0.00394916	6.04374	5.85073	0.106154	5	0	0	0	0	0	0	0	0	0	0	0	0	0	0	0	0	0	0	0	0	0	0	0	0	0	0	0	0	0	0	0	0	0	0	0	0	0	0	0
simsample389	-49.2	5154870	3.41774	2.63995	0.0038718	0.0038718	5.9883	6.00437	0.0948065	5	0	0	0	0	0	0	0	0	0	0	0	0	0	0	0	0	0	0	0	0	0	0	0	0	0	0	0	0	0	0	0	0	0	0	0	0	0	0	0
simsample390	-56.4	4323670	3.3449	2.74919	0.00394898	0.00394898	5.71628	6.01223	0.101918	5	0	0	0	0	0	0	0	0	0	0	0	0	0	0	0	0	0	0	0	0	0	0	0	0	0	0	0	0	0	0	0	0	0	0	0	0	0	0	0
simsample391	-53.85	5631160	3.43271	2.497	0.00396723	0.00396723	5.87576	5.65381	0.105778	5	0	0	0	0	0	0	0	0	0	0	0	0	0	0	0	0	0	0	0	0	0	0	0	0	0	0	0	0	0	0	0	0	0	0	0	0	0	0	0
simsample392	-48.9	4323650	3.31398	2.67181	0.0038723	0.0038723	5.61817	5.67242	0.0825763	5	0	0	0	0	0	0	0	0	0	0	0	0	0	0	0	0	0	0	0	0	0	0	0	0	0	0	0	0	0	0	0	0	0	0	0	0	0	0	0
simsample393	-50.5	4326220	3.33217	2.68775	0.0039104	0.0039104	5.64551	6.05592	0.101759	5	0	0	0	0	0	0	0	0	0	0	0	0	0	0	0	0	0	0	0	0	0	0	0	0	0	0	0	0	0	0	0	0	0	0	0	0	0	0	0
simsample394	-53	4738500	3.37453	2.79354	0.00397457	0.00397457	5.89785	5.92967	0.117789	5	0	0	0	0	0	0	0	0	0	0	0	0	0	0	0	0	0	0	0	0	0	0	0	0	0	0	0	0	0	0	0	0	0	0	0	0	0	0	0
simsample395	-52.75	4849930	3.36423	2.8457	0.00404658	0.00404658	5.78893	5.49284	0.11552	5	0	0	0	0	0	0	0	0	0	0	0	0	0	0	0	0	0	0	0	0	0	0	0	0	0	0	0	0	0	0	0	0	0	0	0	0	0	0	0
simsample396	-52.6	4885550	3.39472	2.79566	0.00395052	0.00395052	5.88387	5.77683	0.0995577	5	0	0	0	0	0	0	0	0	0	0	0	0	0	0	0	0	0	0	0	0	0	0	0	0	0	0	0	0	0	0	0	0	0	0	0	0	0	0	0
simsample397	-50.05	4326980	3.30246	2.67643	0.00394142	0.00394142	5.55444	5.69685	0.107358	5	0	0	0	0	0	0	0	0	0	0	0	0	0	0	0	0	0	0	0	0	0	0	0	0	0	0	0	0	0	0	0	0	0	0	0	0	0	0	0
simsample398	-51.3	4946010	3.40754	2.75776	0.00391958	0.00391958	5.91246	5.89403	0.0929033	5	0	0	0	0	0	0	0	0	0	0	0	0	0	0	0	0	0	0	0	0	0	0	0	0	0	0	0	0	0	0	0	0	0	0	0	0	0	0	0
simsample399	-52.35	4474270	3.34501	2.70354	0.00393409	0.00393409	5.76442	5.84561	0.0992385	5	0	0	0	0	0	0	0	0	0	0	0	0	0	0	0	0	0	0	0	0	0	0	0	0	0	0	0	0	0	0	0	0	0	0	0	0	0	0	0
simsample400	-52.25	5039000	3.40292	2.60399	0.0038596	0.0038596	6.27007	5.9688	0.0936688	5	0	0	0	0	0	0	0	0	0	0	0	0	0	0	0	0	0	0	0	0	0	0	0	0	0	0	0	0	0	0	0	0	0	0	0	0	0	0	0
simsample401	-55.7	4757400	3.3772	2.77931	0.00396793	0.00396793	6.09144	5.85066	0.106429	5	0	0	0	0	0	0	0	0	0	0	0	0	0	0	0	0	0	0	0	0	0	0	0	0	0	0	0	0	0	0	0	0	0	0	0	0	0	0	0
simsample402	-50.4	4461590	3.34213	2.77205	0.00390962	0.00390962	5.80713	5.87642	0.100428	5	0	0	0	0	0	0	0	0	0	0	0	0	0	0	0	0	0	0	0	0	0	0	0	0	0	0	0	0	0	0	0	0	0	0	0	0	0	0	0
simsample403	-55	4460070	3.37587	2.81384	0.00393909	0.00393909	5.72725	6.13328	0.100164	5	0	0	0	0	0	0	0	0	0	0	0	0	0	0	0	0	0	0	0	0	0	0	0	0	0	0	0	0	0	0	0	0	0	0	0	0	0	0	0
simsample404	-52.4	4246380	3.31373	2.79889	0.00390596	0.00390596	5.99243	5.81183	0.094119	5	0	0	0	0	0	0	0	0	0	0	0	0	0	0	0	0	0	0	0	0	0	0	0	0	0	0	0	0	0	0	0	0	0	0	0	0	0	0	0
simsample405	-51.25	4900820	3.3811	2.83379	0.0039928	0.0039928	5.76071	5.64933	0.108913	5	0	0	0	0	0	0	0	0	0	0	0	0	0	0	0	0	0	0	0	0	0	0	0	0	0	0	0	0	0	0	0	0	0	0	0	0	0	0	0
simsample406	-50.25	5575100	3.42066	2.47687	0.00393697	0.00393697	5.8093	5.62165	0.100284	5	0	0	0	0	0	0	0	0	0	0	0	0	0	0	0	0	0	0	0	0	0	0	0	0	0	0	0	0	0	0	0	0	0	0	0	0	0	0	0
simsample407	-47.7	4579200	3.38639	2.81036	0.00384663	0.00384663	5.82121	6.03886	0.0745814	5	0	0	0	0	0	0	0	0	0	0	0	0	0	0	0	0	0	0	0	0	0	0	0	0	0	0	0	0	0	0	0	0	0	0	0	0	0	0	0
simsample408	-55.95	4782560	3.36321	2.8042	0.00398849	0.00398849	5.96292	5.67193	0.119395	5	0	0	0	0	0	0	0	0	0	0	0	0	0	0	0	0	0	0	0	0	0	0	0	0	0	0	0	0	0	0	0	0	0	0	0	0	0	0	0
simsample409	-50.15	4891580	3.3832	2.84397	0.00398355	0.00398355	5.75546	5.66232	0.105815	5	0	0	0	0	0	0	0	0	0	0	0	0	0	0	0	0	0	0	0	0	0	0	0	0	0	0	0	0	0	0	0	0	0	0	0	0	0	0	0
simsample410	-51.15	4365170	3.34953	2.80158	0.00391516	0.00391516	5.68385	5.96301	0.0931736	5	0	0	0	0	0	0	0	0	0	0	0	0	0	0	0	0	0	0	0	0	0	0	0	0	0	0	0	0	0	0	0	0	0	0	0	0	0	0	0
simsample411	-49.9	4318870	3.33014	2.80445	0.00389786	0.00389786	5.7612	5.82249	0.0883211	5	0	0	0	0	0	0	0	0	0	0	0	0	0	0	0	0	0	0	0	0	0	0	0	0	0	0	0	0	0	0	0	0	0	0	0	0	0	0	0
simsample412	-56.9	4319600	3.34311	2.74481	0.00394898	0.00394898	5.7195	6.02114	0.104569	5	0	0	0	0	0	0	0	0	0	0	0	0	0	0	0	0	0	0	0	0	0	0	0	0	0	0	0	0	0	0	0	0	0	0	0	0	0	0	0
simsample413	-55.4	4765220	3.38384	2.8021	0.0039701	0.0039701	5.79013	5.74701	0.101179	5	0	0	0	0	0	0	0	0	0	0	0	0	0	0	0	0	0	0	0	0	0	0	0	0	0	0	0	0	0	0	0	0	0	0	0	0	0	0	0
simsample414	-58.25	4480530	3.35398	2.74128	0.00400224	0.00400224	5.72	5.96097	0.117351	5	0	0	0	0	0	0	0	0	0	0	0	0	0	0	0	0	0	0	0	0	0	0	0	0	0	0	0	0	0	0	0	0	0	0	0	0	0	0	0
simsample415	-56.25	4339350	3.32983	2.79013	0.00392917	0.00392917	6.03422	5.93565	0.112077	5	0	0	0	0	0	0	0	0	0	0	0	0	0	0	0	0	0	0	0	0	0	0	0	0	0	0	0	0	0	0	0	0	0	0	0	0	0	0	0
simsample416	-53.3	4436060	3.35295	2.71489	0.00393507	0.00393507	5.7266	6.03699	0.100624	5	0	0	0	0	0	0	0	0	0	0	0	0	0	0	0	0	0	0	0	0	0	0	0	0	0	0	0	0	0	0	0	0	0	0	0	0	0	0	0
simsample417	-51.1	5571300	3.41839	2.45776	0.00393697	0.00393697	5.85822	5.65047	0.105092	5	0	0	0	0	0	0	0	0	0	0	0	0	0	0	0	0	0	0	0	0	0	0	0	0	0	0	0	0	0	0	0	0	0	0	0	0	0	0	0
simsample418	-56.85	5349500	3.42697	2.68614	0.00398769	0.00398769	6.02835	5.86867	0.118703	5	0	0	0	0	0	0	0	0	0	0	0	0	0	0	0	0	0	0	0	0	0	0	0	0	0	0	0	0	0	0	0	0	0	0	0	0	0	0	0
simsample419	-48.5	4458440	3.36567	2.83557	0.0038768	0.0038768	5.80375	6.05921	0.0879578	5	0	0	0	0	0	0	0	0	0	0	0	0	0	0	0	0	0	0	0	0	0	0	0	0	0	0	0	0	0	0	0	0	0	0	0	0	0	0	0
simsample420	-50.55	4413520	3.33862	2.71056	0.00388312	0.00388312	5.99894	5.99758	0.0940535	5	0	0	0	0	0	0	0	0	0	0	0	0	0	0	0	0	0	0	0	0	0	0	0	0	0	0	0	0	0	0	0	0	0	0	0	0	0	0	0
simsample421	-52.75	4938390	3.41103	2.8172	0.00395052	0.00395052	5.95946	5.88872	0.0965483	5	0	0	0	0	0	0	0	0	0	0	0	0	0	0	0	0	0	0	0	0	0	0	0	0	0	0	0	0	0	0	0	0	0	0	0	0	0	0	0
simsample422	-56.05	4470370	3.3747	2.78316	0.00390179	0.00390179	6.0081	6.13029	0.0924349	5	0	0	0	0	0	0	0	0	0	0	0	0	0	0	0	0	0	0	0	0	0	0	0	0	0	0	0	0	0	0	0	0	0	0	0	0	0	0	0
simsample423	-57.4	4881080	3.41431	2.9075	0.00402296	0.00402296	5.72253	5.84717	0.105829	5	0	0	0	0	0	0	0	0	0	0	0	0	0	0	0	0	0	0	0	0	0	0	0	0	0	0	0	0	0	0	0	0	0	0	0	0	0	0	0
simsample424	-52.65	4811060	3.37498	2.80078	0.00398355	0.00398355	5.81448	5.65413	0.106498	5	0	0	0	0	0	0	0	0	0	0	0	0	0	0	0	0	0	0	0	0	0	0	0	0	0	0	0	0	0	0	0	0	0	0	0	0	0	0	0
simsample425	-51.15	5014630	3.41029	2.89246	0.00401625	0.00401625	5.62703	5.72055	0.106191	5	0	0	0	0	0	0	0	0	0	0	0	0	0	0	0	0	0	0	0	0	0	0	0	0	0	0	0	0	0	0	0	0	0	0	0	0	0	0	0
simsample426	-58.75	4409630	3.36559	2.81194	0.0039765	0.0039765	5.87378	6.07496	0.106732	5	0	0	0	0	0	0	0	0	0	0	0	0	0	0	0	0	0	0	0	0	0	0	0	0	0	0	0	0	0	0	0	0	0	0	0	0	0	0	0
simsample427	-52.3	5403330	3.43282	2.69027	0.00395988	0.00395988	5.98954	5.79797	0.10651	5	0	0	0	0	0	0	0	0	0	0	0	0	0	0	0	0	0	0	0	0	0	0	0	0	0	0	0	0	0	0	0	0	0	0	0	0	0	0	0
simsample428	-50.5	4274830	3.29168	2.73361	0.00389788	0.00389788	6.06287	5.76335	0.108229	5	0	0	0	0	0	0	0	0	0	0	0	0	0	0	0	0	0	0	0	0	0	0	0	0	0	0	0	0	0	0	0	0	0	0	0	0	0	0	0
simsample429	-53.45	4743910	3.34797	2.80525	0.00403799	0.00403799	5.74805	5.46668	0.11454	5	0	0	0	0	0	0	0	0	0	0	0	0	0	0	0	0	0	0	0	0	0	0	0	0	0	0	0	0	0	0	0	0	0	0	0	0	0	0	0
simsample430	-54.35	4910120	3.41076	2.75959	0.00393502	0.00393502	5.96501	5.91589	0.0933031	5	0	0	0	0	0	0	0	0	0	0	0	0	0	0	0	0	0	0	0	0	0	0	0	0	0	0	0	0	0	0	0	0	0	0	0	0	0	0	0
simsample431	-50	4396620	3.32497	2.77198	0.00391666	0.00391666	5.91027	5.87071	0.106846	5	0	0	0	0	0	0	0	0	0	0	0	0	0	0	0	0	0	0	0	0	0	0	0	0	0	0	0	0	0	0	0	0	0	0	0	0	0	0	0
simsample432	-53.35	5377030	3.43083	2.68078	0.00395988	0.00395988	6.02963	5.73621	0.101427	5	0	0	0	0	0	0	0	0	0	0	0	0	0	0	0	0	0	0	0	0	0	0	0	0	0	0	0	0	0	0	0	0	0	0	0	0	0	0	0
simsample433	-54.35	4809620	3.34045	2.83538	0.00406891	0.00406891	5.81297	5.3478	0.125458	5	0	0	0	0	0	0	0	0	0	0	0	0	0	0	0	0	0	0	0	0	0	0	0	0	0	0	0	0	0	0	0	0	0	0	0	0	0	0	0
simsample434	-54.25	4389920	3.36474	2.80356	0.00388164	0.00388164	6.0232	6.06168	0.0869765	5	0	0	0	0	0	0	0	0	0	0	0	0	0	0	0	0	0	0	0	0	0	0	0	0	0	0	0	0	0	0	0	0	0	0	0	0	0	0	0
simsample435	-50.3	4304810	3.32685	2.68677	0.0039104	0.0039104	5.60904	6.04147	0.103414	5	0	0	0	0	0	0	0	0	0	0	0	0	0	0	0	0	0	0	0	0	0	0	0	0	0	0	0	0	0	0	0	0	0	0	0	0	0	0	0
simsample436	-61.9	5609080	3.43598	2.45169	0.0040228	0.0040228	6.02253	5.80656	0.12025	5	0	0	0	0	0	0	0	0	0	0	0	0	0	0	0	0	0	0	0	0	0	0	0	0	0	0	0	0	0	0	0	0	0	0	0	0	0	0	0
simsample437	-56	4868460	3.40906	2.91327	0.00402296	0.00402296	5.72507	5.85082	0.106465	5	0	0	0	0	0	0	0	0	0	0	0	0	0	0	0	0	0	0	0	0	0	0	0	0	0	0	0	0	0	0	0	0	0	0	0	0	0	0	0
simsample438	-49.2	5081430	3.4024	2.61263	0.0038615	0.0038615	6.1742	5.96115	0.0902549	5	0	0	0	0	0	0	0	0	0	0	0	0	0	0	0	0	0	0	0	0	0	0	0	0	0	0	0	0	0	0	0	0	0	0	0	0	0	0	0
simsample439	-54.85	4823820	3.34067	2.82752	0.00406891	0.00406891	5.81387	5.32969	0.126122	5	0	0	0	0	0	0	0	0	0	0	0	0	0	0	0	0	0	0	0	0	0	0	0	0	0	0	0	0	0	0	0	0	0	0	0	0	0	0	0
simsample440	-55.8	4221190	3.31829	2.77153	0.00393958	0.00393958	5.88041	5.80785	0.0964511	5	0	0	0	0	0	0	0	0	0	0	0	0	0	0	0	0	0	0	0	0	0	0	0	0	0	0	0	0	0	0	0	0	0	0	0	0	0	0	0
simsample441	-50.55	5572690	3.41965	2.47662	0.00393697	0.00393697	5.81045	5.61797	0.102521	5	0	0	0	0	0	0	0	0	0	0	0	0	0	0	0	0	0	0	0	0	0	0	0	0	0	0	0	0	0	0	0	0	0	0	0	0	0	0	0
simsample442	-50.35	4159700	3.32041	2.7865	0.00385577	0.00385577	6.01218	6.0224	0.0830477	5	0	0	0	0	0	0	0	0	0	0	0	0	0	0	0	0	0	0	0	0	0	0	0	0	0	0	0	0	0	0	0	0	0	0	0	0	0	0	0
simsample443	-55.15	4832180	3.36299	2.8154	0.00402083	0.00402083	5.92004	5.48124	0.108114	5	0	0	0	0	0	0	0	0	0	0	0	0	0	0	0	0	0	0	0	0	0	0	0	0	0	0	0	0	0	0	0	0	0	0	0	0	0	0	0
simsample444	-50.05	4451760	3.34275	2.69312	0.00389598	0.00389598	5.66423	5.94468	0.0966657	5	0	0	0	0	0	0	0	0	0	0	0	0	0	0	0	0	0	0	0	0	0	0	0	0	0	0	0	0	0	0	0	0	0	0	0	0	0	0	0
simsample445	-54.85	4868010	3.39848	2.89982	0.00402296	0.00402296	5.7402	5.82022	0.115095	5	0	0	0	0	0	0	0	0	0	0	0	0	0	0	0	0	0	0	0	0	0	0	0	0	0	0	0	0	0	0	0	0	0	0	0	0	0	0	0
simsample446	-52.6	4853950	3.35832	2.7689	0.00400665	0.00400665	5.79668	5.47843	0.110744	5	0	0	0	0	0	0	0	0	0	0	0	0	0	0	0	0	0	0	0	0	0	0	0	0	0	0	0	0	0	0	0	0	0	0	0	0	0	0	0
simsample447	-52.25	4308040	3.33025	2.73266	0.00393369	0.00393369	5.78425	5.97893	0.102702	5	0	0	0	0	0	0	0	0	0	0	0	0	0	0	0	0	0	0	0	0	0	0	0	0	0	0	0	0	0	0	0	0	0	0	0	0	0	0	0
simsample448	-55.55	4150520	3.29679	2.78213	0.00392178	0.00392178	5.92213	5.65105	0.0932538	5	0	0	0	0	0	0	0	0	0	0	0	0	0	0	0	0	0	0	0	0	0	0	0	0	0	0	0	0	0	0	0	0	0	0	0	0	0	0	0
simsample449	-55.5	4745480	3.34638	2.8065	0.00403799	0.00403799	5.72382	5.46625	0.121522	5	0	0	0	0	0	0	0	0	0	0	0	0	0	0	0	0	0	0	0	0	0	0	0	0	0	0	0	0	0	0	0	0	0	0	0	0	0	0	0
simsample450	-50.6	4491650	3.34943	2.65522	0.00391788	0.00391788	5.52764	5.87859	0.0942445	5	0	0	0	0	0	0	0	0	0	0	0	0	0	0	0	0	0	0	0	0	0	0	0	0	0	0	0	0	0	0	0	0	0	0	0	0	0	0	0
simsample451	-50.25	4409320	3.32928	2.7733	0.00391666	0.00391666	5.88162	5.85859	0.104001	5	0	0	0	0	0	0	0	0	0	0	0	0	0	0	0	0	0	0	0	0	0	0	0	0	0	0	0	0	0	0	0	0	0	0	0	0	0	0	0
simsample452	-48	5620400	3.41453	2.46081	0.00393697	0.00393697	5.77838	5.63033	0.111354	5	0	0	0	0	0	0	0	0	0	0	0	0	0	0	0	0	0	0	0	0	0	0	0	0	0	0	0	0	0	0	0	0	0	0	0	0	0	0	0
simsample453	-54.5	4866200	3.40816	2.90518	0.00402296	0.00402296	5.74245	5.86493	0.106723	5	0	0	0	0	0	0	0	0	0	0	0	0	0	0	0	0	0	0	0	0	0	0	0	0	0	0	0	0	0	0	0	0	0	0	0	0	0	0	0
simsample454	-54.35	5294800	3.42149	2.7137	0.00394539	0.00394539	6.14284	5.78799	0.108238	5	0	0	0	0	0	0	0	0	0	0	0	0	0	0	0	0	0	0	0	0	0	0	0	0	0	0	0	0	0	0	0	0	0	0	0	0	0	0	0
simsample455	-50.5	4149290	3.33669	2.81676	0.00384376	0.00384376	6.02544	6.06863	0.0707457	5	0	0	0	0	0	0	0	0	0	0	0	0	0	0	0	0	0	0	0	0	0	0	0	0	0	0	0	0	0	0	0	0	0	0	0	0	0	0	0
simsample456	-53.95	4905160	3.3858	2.79063	0.00397791	0.00397791	5.83819	5.59734	0.100053	5	0	0	0	0	0	0	0	0	0	0	0	0	0	0	0	0	0	0	0	0	0	0	0	0	0	0	0	0	0	0	0	0	0	0	0	0	0	0	0
simsample457	-55.5	4823330	3.35272	2.81771	0.00405626	0.00405626	5.75468	5.41276	0.120449	5	0	0	0	0	0	0	0	0	0	0	0	0	0	0	0	0	0	0	0	0	0	0	0	0	0	0	0	0	0	0	0	0	0	0	0	0	0	0	0
simsample458	-51.65	4290030	3.33716	2.78394	0.00393468	0.00393468	5.6814	5.97303	0.101065	5	0	0	0	0	0	0	0	0	0	0	0	0	0	0	0	0	0	0	0	0	0	0	0	0	0	0	0	0	0	0	0	0	0	0	0	0	0	0	0
simsample459	-51.15	4524700	3.34073	2.70777	0.00393409	0.00393409	5.81901	5.852	0.105277	5	0	0	0	0	0	0	0	0	0	0	0	0	0	0	0	0	0	0	0	0	0	0	0	0	0	0	0	0	0	0	0	0	0	0	0	0	0	0	0
simsample460	-51	5323810	3.42788	2.71715	0.00391708	0.00391708	6.05405	5.86909	0.102419	5	0	0	0	0	0	0	0	0	0	0	0	0	0	0	0	0	0	0	0	0	0	0	0	0	0	0	0	0	0	0	0	0	0	0	0	0	0	0	0
simsample461	-54.5	4410290	3.3645	2.80798	0.00392673	0.00392673	5.93166	6.12293	0.0981061	5	0	0	0	0	0	0	0	0	0	0	0	0	0	0	0	0	0	0	0	0	0	0	0	0	0	0	0	0	0	0	0	0	0	0	0	0	0	0	0
simsample462	-54.05	4228150	3.31992	2.79898	0.00390596	0.00390596	6.00834	5.81079	0.090321	5	0	0	0	0	0	0	0	0	0	0	0	0	0	0	0	0	0	0	0	0	0	0	0	0	0	0	0	0	0	0	0	0	0	0	0	0	0	0	0
simsample463	-57.35	4214550	3.30024	2.75354	0.00394553	0.00394553	6.11251	5.77785	0.107705	5	0	0	0	0	0	0	0	0	0	0	0	0	0	0	0	0	0	0	0	0	0	0	0	0	0	0	0	0	0	0	0	0	0	0	0	0	0	0	0
simsample464	-51	4248150	3.2963	2.81215	0.00392328	0.00392328	6.04597	5.68252	0.102254	5	0	0	0	0	0	0	0	0	0	0	0	0	0	0	0	0	0	0	0	0	0	0	0	0	0	0	0	0	0	0	0	0	0	0	0	0	0	0	0
simsample465	-57.5	4379390	3.33564	2.82344	0.00396448	0.00396448	5.96015	5.93229	0.118418	5	0	0	0	0	0	0	0	0	0	0	0	0	0	0	0	0	0	0	0	0	0	0	0	0	0	0	0	0	0	0	0	0	0	0	0	0	0	0	0
simsample466	-53.25	4726100	3.37245	2.78772	0.00398849	0.00398849	5.81015	5.75911	0.10863	5	0	0	0	0	0	0	0	0	0	0	0	0	0	0	0	0	0	0	0	0	0	0	0	0	0	0	0	0	0	0	0	0	0	0	0	0	0	0	0
simsample467	-50.9	4886800	3.38273	2.84327	0.00398355	0.00398355	5.7656	5.66369	0.107142	5	0	0	0	0	0	0	0	0	0	0	0	0	0	0	0	0	0	0	0	0	0	0	0	0	0	0	0	0	0	0	0	0	0	0	0	0	0	0	0
simsample468	-59.8	5484030	3.41548	2.49926	0.00404407	0.00404407	5.96177	5.75449	0.130198	5	0	0	0	0	0	0	0	0	0	0	0	0	0	0	0	0	0	0	0	0	0	0	0	0	0	0	0	0	0	0	0	0	0	0	0	0	0	0	0
simsample469	-46.9	4995120	3.39302	2.67504	0.00384124	0.00384124	6.08768	5.78058	0.0795117	5	0	0	0	0	0	0	0	0	0	0	0	0	0	0	0	0	0	0	0	0	0	0	0	0	0	0	0	0	0	0	0	0	0	0	0	0	0	0	0
simsample470	-52.25	4323880	3.33201	2.75707	0.00390276	0.00390276	5.85957	5.92497	0.0992122	5	0	0	0	0	0	0	0	0	0	0	0	0	0	0	0	0	0	0	0	0	0	0	0	0	0	0	0	0	0	0	0	0	0	0	0	0	0	0	0
simsample471	-54.15	5008050	3.39624	2.60126	0.00388096	0.00388096	6.13785	5.75524	0.0847	5	0	0	0	0	0	0	0	0	0	0	0	0	0	0	0	0	0	0	0	0	0	0	0	0	0	0	0	0	0	0	0	0	0	0	0	0	0	0	0
simsample472	-52.7	4326550	3.3306	2.73202	0.00393369	0.00393369	5.78749	5.9871	0.107224	5	0	0	0	0	0	0	0	0	0	0	0	0	0	0	0	0	0	0	0	0	0	0	0	0	0	0	0	0	0	0	0	0	0	0	0	0	0	0	0
simsample473	-54.45	4421550	3.33353	2.67912	0.00394233	0.00394233	5.93112	5.99456	0.1131	5	0	0	0	0	0	0	0	0	0	0	0	0	0	0	0	0	0	0	0	0	0	0	0	0	0	0	0	0	0	0	0	0	0	0	0	0	0	0	0
simsample474	-52.05	4336850	3.34733	2.82279	0.0039053	0.0039053	6.02488	6.1265	0.101215	5	0	0	0	0	0	0	0	0	0	0	0	0	0	0	0	0	0	0	0	0	0	0	0	0	0	0	0	0	0	0	0	0	0	0	0	0	0	0	0
simsample475	-54.4	4280450	3.31439	2.76709	0.00394054	0.00394054	5.92844	5.78108	0.101684	5	0	0	0	0	0	0	0	0	0	0	0	0	0	0	0	0	0	0	0	0	0	0	0	0	0	0	0	0	0	0	0	0	0	0	0	0	0	0	0
simsample476	-61.15	5621780	3.43056	2.48325	0.0040224	0.0040224	6.08901	5.69136	0.119044	5	0	0	0	0	0	0	0	0	0	0	0	0	0	0	0	0	0	0	0	0	0	0	0	0	0	0	0	0	0	0	0	0	0	0	0	0	0	0	0
simsample477	-47.3	4841160	3.37388	2.71394	0.00384124	0.00384124	6.05592	5.70961	0.0808714	5	0	0	0	0	0	0	0	0	0	0	0	0	0	0	0	0	0	0	0	0	0	0	0	0	0	0	0	0	0	0	0	0	0	0	0	0	0	0	0
simsample478	-48	4367820	3.34849	2.80759	0.00385628	0.00385628	5.69435	5.96707	0.0841901	5	0	0	0	0	0	0	0	0	0	0	0	0	0	0	0	0	0	0	0	0	0	0	0	0	0	0	0	0	0	0	0	0	0	0	0	0	0	0	0
simsample479	-57.55	4924230	3.40816	2.85969	0.0040258	0.0040258	5.80828	5.78787	0.107757	5	0	0	0	0	0	0	0	0	0	0	0	0	0	0	0	0	0	0	0	0	0	0	0	0	0	0	0	0	0	0	0	0	0	0	0	0	0	0	0
simsample480	-51.05	4426750	3.36059	2.76324	0.0038768	0.0038768	5.85173	6.08871	0.0908811	5	0	0	0	0	0	0	0	0	0	0	0	0	0	0	0	0	0	0	0	0	0	0	0	0	0	0	0	0	0	0	0	0	0	0	0	0	0	0	0
simsample481	-52.9	4236080	3.31736	2.75612	0.00393468	0.00393468	5.8015	5.97638	0.109564	5	0	0	0	0	0	0	0	0	0	0	0	0	0	0	0	0	0	0	0	0	0	0	0	0	0	0	0	0	0	0	0	0	0	0	0	0	0	0	0
simsample482	-50.3	4447970	3.35018	2.75504	0.00388437	0.00388437	5.85215	5.86268	0.0834043	5	0	0	0	0	0	0	0	0	0	0	0	0	0	0	0	0	0	0	0	0	0	0	0	0	0	0	0	0	0	0	0	0	0	0	0	0	0	0	0
simsample483	-47.05	4383050	3.33673	2.77215	0.00387021	0.00387021	5.64363	5.90544	0.0904073	5	0	0	0	0	0	0	0	0	0	0	0	0	0	0	0	0	0	0	0	0	0	0	0	0	0	0	0	0	0	0	0	0	0	0	0	0	0	0	0
simsample484	-53.3	4177820	3.29878	2.77799	0.00394035	0.00394035	5.93437	5.84022	0.112934	5	0	0	0	0	0	0	0	0	0	0	0	0	0	0	0	0	0	0	0	0	0	0	0	0	0	0	0	0	0	0	0	0	0	0	0	0	0	0	0
simsample485	-53.5	4377630	3.31809	2.60585	0.00395368	0.00395368	5.7634	5.88489	0.108907	5	0	0	0	0	0	0	0	0	0	0	0	0	0	0	0	0	0	0	0	0	0	0	0	0	0	0	0	0	0	0	0	0	0	0	0	0	0	0	0
simsample486	-51.35	4301350	3.30682	2.76805	0.00388694	0.00388694	6.08869	5.70399	0.095165	5	0	0	0	0	0	0	0	0	0	0	0	0	0	0	0	0	0	0	0	0	0	0	0	0	0	0	0	0	0	0	0	0	0	0	0	0	0	0	0
simsample487	-51.8	4567610	3.3456	2.73983	0.00394841	0.00394841	5.7831	5.84641	0.113045	5	0	0	0	0	0	0	0	0	0	0	0	0	0	0	0	0	0	0	0	0	0	0	0	0	0	0	0	0	0	0	0	0	0	0	0	0	0	0	0
simsample488	-50.1	5132190	3.40728	2.59336	0.00386819	0.00386819	6.06943	5.97357	0.095727	5	0	0	0	0	0	0	0	0	0	0	0	0	0	0	0	0	0	0	0	0	0	0	0	0	0	0	0	0	0	0	0	0	0	0	0	0	0	0	0
simsample489	-52.85	4329230	3.33412	2.76221	0.00390276	0.00390276	5.86818	5.90364	0.0928717	5	0	0	0	0	0	0	0	0	0	0	0	0	0	0	0	0	0	0	0	0	0	0	0	0	0	0	0	0	0	0	0	0	0	0	0	0	0	0	0
simsample490	-56.55	4491140	3.33784	2.67749	0.00398536	0.00398536	5.78958	5.8218	0.109818	5	0	0	0	0	0	0	0	0	0	0	0	0	0	0	0	0	0	0	0	0	0	0	0	0	0	0	0	0	0	0	0	0	0	0	0	0	0	0	0
simsample491	-53.1	4453690	3.36997	2.79996	0.00390179	0.00390179	5.98628	6.15045	0.0962995	5	0	0	0	0	0	0	0	0	0	0	0	0	0	0	0	0	0	0	0	0	0	0	0	0	0	0	0	0	0	0	0	0	0	0	0	0	0	0	0
simsample492	-62.25	5612220	3.42843	2.46563	0.0040224	0.0040224	6.1126	5.70639	0.122465	5	0	0	0	0	0	0	0	0	0	0	0	0	0	0	0	0	0	0	0	0	0	0	0	0	0	0	0	0	0	0	0	0	0	0	0	0	0	0	0
simsample493	-52.45	4465460	3.34766	2.71285	0.00392607	0.00392607	5.84264	5.9039	0.0968994	5	0	0	0	0	0	0	0	0	0	0	0	0	0	0	0	0	0	0	0	0	0	0	0	0	0	0	0	0	0	0	0	0	0	0	0	0	0	0	0
simsample494	-55.95	4904310	3.38985	2.91026	0.00405219	0.00405219	5.72411	5.71045	0.123142	5	0	0	0	0	0	0	0	0	0	0	0	0	0	0	0	0	0	0	0	0	0	0	0	0	0	0	0	0	0	0	0	0	0	0	0	0	0	0	0
simsample495	-49.75	4395950	3.34612	2.78622	0.00391516	0.00391516	5.6633	5.92781	0.0946097	5	0	0	0	0	0	0	0	0	0	0	0	0	0	0	0	0	0	0	0	0	0	0	0	0	0	0	0	0	0	0	0	0	0	0	0	0	0	0	0
simsample496	-54.45	4951800	3.41024	2.76979	0.00394618	0.00394618	5.96589	5.91023	0.0999217	5	0	0	0	0	0	0	0	0	0	0	0	0	0	0	0	0	0	0	0	0	0	0	0	0	0	0	0	0	0	0	0	0	0	0	0	0	0	0	0
simsample497	-51.8	4461750	3.32323	2.64743	0.00397289	0.00397289	5.71598	5.84398	0.119675	5	0	0	0	0	0	0	0	0	0	0	0	0	0	0	0	0	0	0	0	0	0	0	0	0	0	0	0	0	0	0	0	0	0	0	0	0	0	0	0
simsample498	-54.2	5638450	3.43403	2.49733	0.00396723	0.00396723	5.87979	5.66814	0.106097	5	0	0	0	0	0	0	0	0	0	0	0	0	0	0	0	0	0	0	0	0	0	0	0	0	0	0	0	0	0	0	0	0	0	0	0	0	0	0	0
simsample499	-49.8	4213270	3.32811	2.82726	0.00385591	0.00385591	6.00436	6.02759	0.0871896	5	0	0	0	0	0	0	0	0	0	0	0	0	0	0	0	0	0	0	0	0	0	0	0	0	0	0	0	0	0	0	0	0	0	0	0	0	0	0	0
simsample500	-49.05	4348500	3.34357	2.81532	0.00388731	0.00388731	5.67546	5.9194	0.0893994	5	0	0	0	0	0	0	0	0	0	0	0	0	0	0	0	0	0	0	0	0	0	0	0	0	0	0	0	0	0	0	0	0	0	0	0	0	0	0	0
[truncated: 1,423 more columns]
