# Supplementary material for: Epidemiological and ecological determinants of Zika virus transmission in an urban setting
Source: eLife journal article supplement (doi:10.7554/elife.29820), 2017-09-05
Supplement: supp [file elife-29820-supp-v1.zip › elife_poa_e29820_Supplementary_File_2.csv]

header	tintro	K	eta	alpha	zeta	zetaprime	HlatP	HinfP	rho	IHintro	ts1	ts2	ts3	ts4	ts5	ts6	ts7	ts8	ts9	ts10	ts11	ts12	ts13	ts14	ts15	ts16	ts17	ts18	ts19	ts20	ts21	ts22	ts23	ts24	ts25	ts26	ts27	ts28	ts29	ts30	ts31	ts32	ts33	ts34	ts35	ts36	ts37	ts38	ts39
simsample1	-49.1	4900160	3.35839	2.80197	0.00398432	0.00398432	5.79904	5.48953	0.113306	5	3.25054	3.09682	3.44616	3.40071	3.77337	3.98571	3.52608	3.6341	3.56224	2.96101	3.87686	3.80618	3.74907	3.67607	3.90272	4.12351	2.28512	2.42656	3.02806	2.47015	1.74653	2.20093	2.31117	1.84329	1.97041	1.45497	1.44153	1.35726	1.46099	1.28994	1.11615	1.13134	1.19166	0.994405	1.11454	1.28078	0.971656	1.5281	1.54639
simsample2	-49.55	4318300	3.33389	2.80804	0.00389786	0.00389786	5.74635	5.82588	0.0839898	5	3.51342	3.41291	3.70623	3.62168	4.10551	4.21315	3.82957	3.9291	3.82262	3.25751	4.22544	4.06032	4.05935	3.91239	4.22901	4.36973	2.33546	2.44204	3.0847	2.49202	1.78391	2.25075	2.34131	1.85979	1.98973	1.46662	1.44336	1.3656	1.46714	1.30218	1.13066	1.15363	1.21292	1.01366	1.13723	1.29859	0.995351	1.57325	1.58299
simsample3	-50.2	4356360	3.33936	2.68315	0.00390111	0.00390111	5.72086	6.00187	0.0903269	5	3.49456	3.38124	3.69141	3.61066	4.079	4.21099	3.80527	3.90914	3.80848	3.22496	4.20479	4.05313	4.04062	3.9055	4.21107	4.37008	2.33977	2.45596	3.10182	2.50691	1.78629	2.25772	2.35395	1.8678	1.99974	1.47151	1.45059	1.37098	1.47454	1.30646	1.13269	1.15443	1.21477	1.01387	1.13833	1.30269	0.994561	1.57544	1.58667
simsample4	-49.55	4851880	3.3833	2.78982	0.00395052	0.00395052	5.86732	5.79775	0.105133	5	3.34844	3.20719	3.54449	3.483	3.88636	4.07617	3.63618	3.74534	3.66426	3.0667	4.00944	3.9113	3.86956	3.77515	4.0306	4.2321	2.31447	2.44567	3.06646	2.49276	1.7662	2.22843	2.3325	1.85368	1.98216	1.46146	1.44558	1.36283	1.46617	1.29569	1.12067	1.1378	1.19788	0.999127	1.12048	1.28437	0.975519	1.53773	1.55265
simsample5	-54.15	4825880	3.36924	2.83354	0.00404658	0.00404658	5.80459	5.56018	0.112775	5	3.19829	3.04783	3.39	3.34403	3.7102	3.91862	3.4694	3.57593	3.5052	2.91561	3.81492	3.74499	3.68973	3.61732	3.84094	4.05709	2.24821	2.38584	2.97731	2.42882	1.71784	2.16427	2.27163	1.81107	1.93557	1.42955	1.4162	1.33351	1.43509	1.26717	1.09622	1.11109	1.17016	0.976457	1.09426	1.25669	0.953456	1.4987	1.51626
simsample6	-53.3	4794220	3.38255	2.80539	0.00397457	0.00397457	5.85231	5.83005	0.109259	5	3.28732	3.13999	3.48219	3.42766	3.81279	4.01494	3.56761	3.67661	3.60085	3.00346	3.9299	3.84618	3.79689	3.71372	3.95402	4.16499	2.29198	2.42728	3.03685	2.47283	1.74976	2.20657	2.31281	1.84011	1.9672	1.45134	1.43686	1.3537	1.45664	1.28651	1.11248	1.12842	1.18825	0.991102	1.11115	1.27481	0.967263	1.52287	1.53905
simsample7	-54.65	4325070	3.32342	2.79917	0.00395825	0.00395825	5.83469	5.90025	0.116224	5	3.23928	3.08051	3.43665	3.39988	3.76648	3.98499	3.51282	3.61943	3.54966	2.94327	3.85377	3.79259	3.72935	3.6636	3.88046	4.10896	2.29164	2.43893	3.03582	2.48042	1.75385	2.20817	2.32259	1.85781	1.98568	1.46771	1.45473	1.36908	1.47413	1.30155	1.12749	1.14234	1.2035	1.00503	1.12609	1.29613	0.983993	1.54575	1.56626
simsample8	-55.35	4142180	3.29657	2.75754	0.00394062	0.00394062	5.9017	5.88843	0.113216	5	3.25908	3.10601	3.45666	3.41831	3.79786	4.00283	3.53636	3.6407	3.56702	2.96434	3.87936	3.80821	3.75035	3.67714	3.90242	4.12209	2.29012	2.43492	3.0344	2.47646	1.75359	2.2084	2.32184	1.85824	1.98677	1.46803	1.45387	1.36897	1.4741	1.3024	1.12942	1.14533	1.20657	1.00799	1.12969	1.30057	0.988915	1.55522	1.57544
simsample9	-50.1	4351510	3.32679	2.69045	0.00388535	0.00388535	5.94592	5.95512	0.0993295	5	3.43043	3.29958	3.62957	3.56416	4.00079	4.16446	3.73028	3.83586	3.74533	3.1476	4.11266	3.99163	3.96057	3.84906	4.12567	4.31101	2.33869	2.46733	3.1017	2.51554	1.78715	2.25665	2.36051	1.87819	2.01015	1.4809	1.46262	1.38033	1.48546	1.31445	1.13938	1.15901	1.22024	1.01853	1.14299	1.31116	0.998926	1.57892	1.59362
simsample10	-54.2	4486630	3.36163	2.77272	0.00392494	0.00392494	6.05473	6.16386	0.109637	5	3.35687	3.20604	3.55679	3.50367	3.89874	4.10386	3.64345	3.75367	3.67593	3.06433	4.01111	3.92583	3.87461	3.79012	4.03458	4.25049	2.34033	2.48035	3.10239	2.5264	1.78781	2.25468	2.36467	1.8833	2.01382	1.48573	1.47091	1.38574	1.49151	1.31743	1.13994	1.15644	1.21795	1.01614	1.13935	1.3083	0.993104	1.56421	1.58151
simsample11	-55.05	4445330	3.35497	2.817	0.00398969	0.00398969	5.76266	6.01678	0.112865	5	3.26121	3.10784	3.45715	3.41193	3.78668	3.99773	3.53791	3.64569	3.57321	2.9716	3.88844	3.81708	3.76043	3.68666	3.91422	4.13448	2.2921	2.43336	3.03589	2.47677	1.75212	2.20734	2.31763	1.84913	1.97645	1.45985	1.44615	1.36171	1.46563	1.29429	1.12022	1.13555	1.19601	0.998246	1.11872	1.28543	0.975679	1.53387	1.55225
simsample12	-52.3	4387730	3.34853	2.69719	0.00392495	0.00392495	5.75566	6.12806	0.104634	5	3.37075	3.23058	3.56928	3.5089	3.92227	4.10647	3.66182	3.76972	3.68618	3.0841	4.03752	3.9338	3.89301	3.79509	4.05527	4.25477	2.32113	2.45475	3.08048	2.5022	1.77282	2.23861	2.34483	1.8651	1.99576	1.47037	1.45415	1.37109	1.47591	1.30449	1.1293	1.14724	1.20822	1.00788	1.1309	1.29815	0.98649	1.55804	1.57371
simsample13	-56.9	4811580	3.36118	2.78446	0.00408376	0.00408376	5.65303	5.51264	0.123532	5	3.0689	2.90414	3.25948	3.228	3.55606	3.79356	3.32409	3.43108	3.37186	2.77815	3.65015	3.61005	3.53744	3.48921	3.68144	3.91987	2.19941	2.34881	2.91911	2.38927	1.68208	2.11916	2.23302	1.78386	1.90658	1.40859	1.39886	1.31489	1.4165	1.24838	1.07905	1.09129	1.15028	0.959371	1.07498	1.23836	0.936147	1.47008	1.49073
simsample14	-52.6	5665070	3.43359	2.51852	0.003975	0.003975	5.90214	5.65118	0.109095	5	3.33083	3.18325	3.5297	3.45692	3.85381	4.06202	3.61442	3.73148	3.65381	3.04077	4.0147	3.9128	3.86756	3.77385	4.03532	4.24544	2.29284	2.4288	3.06291	2.48174	1.74472	2.21347	2.31913	1.82984	1.96046	1.43733	1.42417	1.34159	1.44573	1.27393	1.09731	1.11345	1.17356	0.975204	1.09615	1.25825	0.948321	1.50604	1.51915
simsample15	-51.9	4750910	3.37277	2.81186	0.0039701	0.0039701	5.78162	5.73934	0.101423	5	3.35722	3.22346	3.55151	3.48732	3.9014	4.07615	3.64797	3.75457	3.66974	3.08148	4.02113	3.91326	3.87839	3.77618	4.0395	4.2298	2.30625	2.43232	3.05229	2.47918	1.76035	2.22027	2.32141	1.84546	1.97327	1.45534	1.43817	1.3567	1.45908	1.29057	1.11721	1.13523	1.19484	0.997136	1.11817	1.28077	0.974697	1.53639	1.55051
simsample16	-47.55	4971250	3.39247	2.63609	0.0038431	0.0038431	6.01969	5.82499	0.0798097	5	3.65461	3.56058	3.85272	3.74355	4.25988	4.36033	3.9845	4.09201	3.97703	3.39652	4.42642	4.22934	4.2412	4.07145	4.42517	4.55486	2.38946	2.49146	3.17044	2.54858	1.81851	2.3043	2.39168	1.88523	2.01972	1.48173	1.4578	1.38002	1.48337	1.3152	1.13845	1.16274	1.22287	1.01925	1.14571	1.30649	0.99754	1.58694	1.59291
simsample17	-55.95	4896310	3.38831	2.9082	0.00405219	0.00405219	5.72411	5.71045	0.123142	5	3.12607	2.95808	3.3185	3.28576	3.61515	3.85949	3.38555	3.49525	3.43599	2.83462	3.71528	3.67791	3.60409	3.55654	3.74999	3.99351	2.24777	2.39749	2.97614	2.43835	1.71855	2.16225	2.2763	1.81827	1.94173	1.43645	1.42637	1.3408	1.44333	1.27235	1.09938	1.11139	1.1709	0.976833	1.0937	1.25787	0.95136	1.49008	1.51044
simsample18	-50.05	4196690	3.3182	2.80424	0.00385577	0.00385577	6.0735	6.04856	0.0931533	5	3.52328	3.40204	3.72293	3.6526	4.1143	4.25721	3.83494	3.93844	3.84016	3.24713	4.222	4.08496	4.06451	3.93888	4.23241	4.40374	2.38448	2.50645	3.15151	2.55473	1.82319	2.29834	2.39893	1.91093	2.04385	1.50812	1.48707	1.40485	1.51031	1.33874	1.16221	1.18354	1.24509	1.04062	1.16695	1.33597	1.02179	1.61186	1.62543
simsample19	-51	4400100	3.31287	2.66011	0.00394142	0.00394142	5.67412	5.6349	0.0962753	5	3.3834	3.26126	3.57841	3.51098	3.95175	4.09934	3.68139	3.78329	3.69067	3.10897	4.06033	3.93087	3.90642	3.78901	4.06971	4.24212	2.29114	2.41419	3.03953	2.46213	1.75131	2.21229	2.3125	1.83973	1.96959	1.45037	1.43144	1.35161	1.45455	1.2878	1.11698	1.13716	1.19713	0.999408	1.12181	1.28665	0.981369	1.55292	1.5666
simsample20	-49.05	5084750	3.38561	2.60082	0.00388208	0.00388208	6.18056	5.81922	0.0989409	5	3.51412	3.38099	3.71754	3.63773	4.08472	4.25743	3.82023	3.93357	3.84109	3.22665	4.23207	4.09973	4.07124	3.952	4.24535	4.43328	2.38178	2.51032	3.16883	2.56358	1.81504	2.29832	2.40153	1.90009	2.03506	1.49474	1.47699	1.39383	1.50049	1.32605	1.14609	1.16576	1.22768	1.02252	1.14877	1.31648	0.999004	1.58477	1.59722
simsample21	-51.15	4419940	3.33399	2.74447	0.00390276	0.00390276	5.87894	5.83997	0.0992401	5	3.39664	3.26684	3.59316	3.529	3.95906	4.12207	3.69325	3.79776	3.70857	3.11827	4.06934	3.95174	3.92073	3.81143	4.08348	4.26756	2.3197	2.44623	3.07269	2.49342	1.77256	2.23658	2.33884	1.86158	1.99159	1.46831	1.45008	1.36851	1.47226	1.30301	1.12952	1.14878	1.20923	1.00963	1.13257	1.29848	0.989722	1.56237	1.57689
simsample22	-50.3	4389100	3.34712	2.78825	0.00391516	0.00391516	5.65736	5.92711	0.0946097	5	3.41883	3.29784	3.61308	3.54193	3.98441	4.13217	3.71966	3.82305	3.72952	3.14926	4.1011	3.97063	3.94867	3.82897	4.11304	4.28407	2.3171	2.43626	3.06526	2.48419	1.76957	2.23247	2.3301	1.85249	1.98154	1.46094	1.44133	1.36126	1.46361	1.29638	1.1239	1.14402	1.20369	1.00517	1.1275	1.29046	0.985012	1.55493	1.56764
simsample23	-56.65	4447550	3.35078	2.72107	0.00396122	0.00396122	5.74095	5.99165	0.110497	5	3.26775	3.11957	3.46352	3.41283	3.79782	3.99912	3.54661	3.65401	3.57852	2.97974	3.9054	3.82272	3.77148	3.69	3.92753	4.13957	2.27803	2.41653	3.02335	2.46156	1.74059	2.19636	2.30493	1.83593	1.96385	1.4481	1.43395	1.35075	1.45439	1.28433	1.11137	1.12747	1.18773	0.990751	1.11122	1.27706	0.968924	1.52765	1.54496
simsample24	-53.45	4219950	3.32149	2.79661	0.00390596	0.00390596	6.00572	5.81773	0.0887846	5	3.43789	3.32918	3.62992	3.55488	4.017	4.13956	3.74465	3.84372	3.74371	3.17711	4.12679	3.97947	3.96859	3.83573	4.13344	4.28638	2.3063	2.41851	3.04776	2.4665	1.76282	2.22329	2.31708	1.84353	1.97216	1.45441	1.43277	1.35453	1.45584	1.29128	1.12123	1.14291	1.20205	1.00464	1.12688	1.28873	0.986735	1.55827	1.56981
simsample25	-54.65	4827900	3.35405	2.81391	0.00405626	0.00405626	5.74967	5.3987	0.117349	5	3.13155	2.97548	3.32234	3.28445	3.63365	3.85261	3.39501	3.50056	3.4348	2.84558	3.72861	3.67225	3.60943	3.54798	3.75645	3.98135	2.22008	2.36279	2.94206	2.40397	1.69766	2.13822	2.24852	1.79565	1.91908	1.41798	1.40608	1.32302	1.42445	1.25699	1.08755	1.10136	1.16033	0.968335	1.08501	1.24808	0.946018	1.48605	1.50529
simsample26	-54.65	4442040	3.34012	2.73375	0.00398532	0.00398532	5.72097	5.98459	0.121004	5	3.20257	3.0362	3.40078	3.36612	3.71781	3.95332	3.47052	3.57991	3.51508	2.90123	3.81192	3.76129	3.6905	3.63384	3.8411	4.08118	2.28043	2.43338	3.02824	2.47558	1.74439	2.19878	2.3161	1.85046	1.97856	1.46092	1.44992	1.36346	1.46904	1.2953	1.12045	1.13409	1.19543	0.997223	1.11781	1.28808	0.974778	1.53296	1.55413
simsample27	-56.85	5271090	3.41842	2.71532	0.00398115	0.00398115	6.14939	5.79358	0.114239	5	3.27751	3.1205	3.47485	3.41872	3.79041	4.0147	3.55383	3.66848	3.59778	2.98612	3.92553	3.85091	3.79365	3.71869	3.95307	4.17856	2.2982	2.43989	3.05537	2.48784	1.75231	2.21411	2.32348	1.84324	1.97156	1.45174	1.43945	1.35494	1.45903	1.28624	1.10954	1.12413	1.18437	0.98608	1.10625	1.27017	0.959324	1.5133	1.52942
simsample28	-47.4	4458090	3.36087	2.84135	0.0038768	0.0038768	5.79608	6.06007	0.090172	5	3.54263	3.42678	3.74028	3.66019	4.12769	4.26491	3.85649	3.96184	3.86129	3.2741	4.25413	4.10742	4.09376	3.96039	4.26448	4.42777	2.38436	2.49966	3.1495	2.54959	1.81985	2.29526	2.39114	1.89905	2.03084	1.49753	1.47596	1.39494	1.4989	1.32869	1.15204	1.17354	1.23419	1.03086	1.15618	1.32097	1.00976	1.59359	1.60492
simsample29	-52.25	4807340	3.34892	2.76752	0.00400665	0.00400665	5.76967	5.48763	0.117856	5	3.17688	3.01784	3.37119	3.3327	3.68757	3.9107	3.44408	3.55143	3.48476	2.88468	3.78428	3.72658	3.66222	3.59994	3.81188	4.04096	2.25077	2.39684	2.98592	2.439	1.72111	2.16907	2.28181	1.82177	1.94761	1.4382	1.42636	1.34199	1.44531	1.27509	1.10309	1.11714	1.17719	0.982153	1.10083	1.26699	0.959812	1.50924	1.52893
simsample30	-61.6	5499150	3.4181	2.52793	0.0040445	0.0040445	6.07447	5.7392	0.130717	5	3.11663	2.93619	3.31544	3.27629	3.597	3.86975	3.37247	3.49099	3.43681	2.80816	3.72867	3.69372	3.60995	3.56858	3.76278	4.02474	2.24068	2.40318	2.99968	2.45065	1.70987	2.1656	2.28661	1.81465	1.94307	1.42816	1.42199	1.33491	1.44074	1.26538	1.0888	1.09966	1.16059	0.964236	1.08263	1.24958	0.936293	1.47992	1.50011
simsample31	-52.8	5229770	3.42252	2.66288	0.00391472	0.00391472	6.09201	5.90998	0.102624	5	3.41827	3.27995	3.61713	3.5408	3.96036	4.14803	3.71259	3.827	3.74195	3.13523	4.1137	3.99813	3.96304	3.85653	4.13247	4.32881	2.33772	2.46626	3.10802	2.51817	1.77981	2.25252	2.35452	1.86128	1.99223	1.46398	1.44793	1.36546	1.46959	1.2976	1.11985	1.13761	1.19793	0.997205	1.11979	1.28251	0.971228	1.53783	1.55013
simsample32	-57.45	4704730	3.36212	2.81492	0.00401277	0.00401277	5.93539	5.56528	0.103347	5	3.2617	3.12786	3.4518	3.39348	3.79168	3.9675	3.5434	3.6471	3.5662	2.98974	3.90225	3.80342	3.76553	3.67073	3.92119	4.11195	2.24984	2.37579	2.97751	2.42064	1.71824	2.16631	2.26693	1.80427	1.92908	1.42342	1.40712	1.32701	1.42736	1.26233	1.09309	1.11033	1.16876	0.975598	1.09383	1.2538	0.954122	1.50301	1.51776
simsample33	-52.1	4737210	3.34413	2.76822	0.00401374	0.00401374	5.73775	5.5251	0.117578	5	3.18145	3.02278	3.37596	3.33776	3.69412	3.91598	3.44924	3.55627	3.48917	2.88903	3.78915	3.73078	3.66676	3.60391	3.81645	4.04494	2.25306	2.39911	2.98855	2.44112	1.7231	2.17135	2.2842	1.82419	1.95019	1.44024	1.42825	1.34383	1.44727	1.27697	1.10496	1.11913	1.17927	0.98402	1.1029	1.26944	0.961976	1.51257	1.53236
simsample34	-52.1	4745920	3.39817	2.82675	0.00390558	0.00390558	5.98164	5.92879	0.0874543	5	3.49186	3.38346	3.6843	3.59552	4.06078	4.18966	3.80154	3.90693	3.806	3.23432	4.20459	4.04965	4.04296	3.90392	4.21388	4.36608	2.33437	2.44178	3.08504	2.49275	1.77834	2.24549	2.33544	1.8485	1.97706	1.45583	1.43433	1.35608	1.45679	1.29111	1.11789	1.13917	1.19784	0.999557	1.12158	1.27946	0.976925	1.54413	1.55303
simsample35	-56.45	5226740	3.409	2.68062	0.00398355	0.00398355	6.12612	5.79517	0.119115	5	3.23468	3.0701	3.43285	3.38388	3.74062	3.97916	3.50535	3.62048	3.55461	2.93722	3.86934	3.80813	3.74223	3.67816	3.899	4.13616	2.28728	2.43575	3.0448	2.48281	1.7451	2.20524	2.31867	1.84149	1.96998	1.45068	1.44002	1.35442	1.45931	1.28541	1.10859	1.12215	1.18282	0.9846	1.10462	1.2704	0.958009	1.511	1.52884
simsample36	-51.65	4862370	3.36474	2.81342	0.00405419	0.00405419	5.60166	5.56197	0.122308	5	3.13265	2.96668	3.32619	3.2929	3.62957	3.86807	3.39363	3.50227	3.44102	2.83873	3.72606	3.68294	3.61094	3.55975	3.75777	3.99784	2.242	2.39221	2.97338	2.4334	1.71451	2.15935	2.27411	1.81659	1.94123	1.4346	1.42426	1.33903	1.44214	1.27135	1.09905	1.11171	1.17159	0.977316	1.09492	1.2606	0.953547	1.49673	1.51736
simsample37	-52.15	4182510	3.29004	2.75868	0.00393385	0.00393385	5.98795	5.79217	0.109754	5	3.31182	3.16355	3.51057	3.4681	3.86306	4.05724	3.59565	3.69954	3.6214	3.01844	3.94541	3.86337	3.81129	3.72938	3.96606	4.1783	2.31214	2.45401	3.06217	2.49645	1.77057	2.22991	2.34198	1.87392	2.00371	1.48036	1.46488	1.38013	1.48578	1.31359	1.13975	1.15672	1.2183	1.01805	1.14105	1.31276	0.999563	1.57274	1.59219
simsample38	-51.1	4318590	3.33344	2.76066	0.00392169	0.00392169	5.75003	5.94207	0.0966678	5	3.41603	3.29097	3.61191	3.54464	3.9834	4.13726	3.71583	3.81944	3.72743	3.14137	4.09467	3.96956	3.94342	3.82808	4.10718	4.2842	2.32283	2.44598	3.07488	2.49352	1.7749	2.23926	2.33957	1.86175	1.99169	1.46848	1.44938	1.36842	1.47179	1.30327	1.13011	1.14999	1.21025	1.01069	1.13374	1.29891	0.991082	1.56461	1.57837
simsample39	-50.35	4918770	3.38018	2.82344	0.00401067	0.00401067	5.61269	5.62061	0.11187	5	3.24031	3.08967	3.43385	3.38427	3.757	3.96596	3.51525	3.62362	3.55134	2.95603	3.86882	3.79461	3.74071	3.66492	3.89475	4.11099	2.27239	2.40991	3.01033	2.45419	1.73545	2.18745	2.29481	1.82756	1.95339	1.44199	1.42836	1.34513	1.44755	1.27809	1.10519	1.12034	1.17986	0.984228	1.10316	1.26635	0.960416	1.51056	1.52759
simsample40	-51	5585650	3.42604	2.50181	0.00395068	0.00395068	5.8197	5.6471	0.104459	5	3.37813	3.2386	3.57725	3.49795	3.91377	4.10556	3.66846	3.78437	3.70089	3.09165	4.07746	3.95959	3.9232	3.81722	4.09403	4.29163	2.30286	2.43368	3.07569	2.48764	1.75195	2.22356	2.32645	1.83432	1.9658	1.44047	1.42577	1.34413	1.44819	1.27713	1.10072	1.11818	1.17831	0.979359	1.10117	1.26306	0.953452	1.51615	1.52807
simsample41	-51.7	4328140	3.33967	2.78454	0.00393468	0.00393468	5.65317	5.97481	0.101667	5	3.35599	3.22227	3.55123	3.4914	3.90822	4.07967	3.6474	3.75191	3.66642	3.07745	4.01547	3.90816	3.87236	3.77075	4.03229	4.2225	2.30594	2.43421	3.05243	2.48013	1.76219	2.22197	2.32502	1.8519	1.9805	1.46121	1.4438	1.36202	1.46518	1.29638	1.12354	1.14194	1.20205	1.00374	1.12555	1.29065	0.983305	1.55006	1.56527
simsample42	-51.15	4277740	3.30735	2.76672	0.00388896	0.00388896	6.13562	5.76346	0.095332	5	3.44456	3.3216	3.64165	3.57614	4.02388	4.1706	3.74828	3.85015	3.75565	3.16894	4.12565	3.99674	3.97245	3.85388	4.13645	4.3104	2.33841	2.46184	3.09349	2.50889	1.7886	2.25527	2.35636	1.87814	2.00915	1.48224	1.46224	1.38092	1.48513	1.31589	1.14241	1.163	1.22379	1.02271	1.14699	1.31447	1.00465	1.58535	1.59958
simsample43	-54.05	4372470	3.35148	2.81852	0.00393909	0.00393909	5.78756	6.04434	0.108166	5	3.29697	3.15171	3.49224	3.44106	3.83204	4.02696	3.57929	3.68569	3.60808	3.01261	3.93622	3.85072	3.80265	3.71779	3.95867	4.16652	2.29643	2.43185	3.03987	2.47611	1.75509	2.2115	2.31845	1.84852	1.97604	1.45912	1.44386	1.36061	1.46398	1.29392	1.1205	1.13703	1.19722	0.999493	1.12029	1.28592	0.977651	1.53821	1.55522
simsample44	-47.95	4376850	3.32271	2.67632	0.00389475	0.00389475	5.60519	5.92284	0.101495	5	3.42404	3.28886	3.62439	3.56206	3.99298	4.16431	3.72217	3.82849	3.73998	3.13698	4.10249	3.98758	3.95222	3.84557	4.11674	4.30853	2.34308	2.47522	3.10904	2.5231	1.79085	2.26135	2.36742	1.8846	2.01707	1.48605	1.46841	1.3853	1.49116	1.319	1.1432	1.16241	1.22404	1.02163	1.14645	1.31608	1.00198	1.58357	1.5991
simsample45	-56.7	4191950	3.30578	2.77884	0.00395107	0.00395107	5.93359	5.83992	0.109606	5	3.26887	3.12256	3.46451	3.42084	3.80936	4.00244	3.54885	3.65221	3.57537	2.98086	3.89569	3.8147	3.76369	3.68269	3.9168	4.12627	2.28232	2.42126	3.02204	2.46357	1.74695	2.20023	2.30993	1.84686	1.97458	1.4588	1.44362	1.36012	1.46404	1.29425	1.12243	1.13903	1.1996	1.00222	1.12327	1.2916	0.983071	1.54653	1.56526
simsample46	-55.9	4127370	3.29586	2.8247	0.00394916	0.00394916	6.04095	5.85403	0.111176	5	3.27723	3.12713	3.47413	3.43513	3.81978	4.01848	3.55703	3.66034	3.58484	2.98587	3.89867	3.82442	3.76956	3.69316	3.92155	4.13689	2.2996	2.4416	3.04146	2.48265	1.76125	2.21591	2.3278	1.86424	1.99236	1.47354	1.45848	1.37378	1.47855	1.30721	1.13426	1.15056	1.21166	1.01285	1.13463	1.30508	0.99392	1.56098	1.58085
simsample47	-50.95	5107750	3.41619	2.60595	0.0038615	0.0038615	6.14759	5.95964	0.0845514	5	3.61392	3.50991	3.81278	3.70625	4.20263	4.32429	3.9362	4.04734	3.93871	3.3495	4.37757	4.195	4.1976	4.0396	4.38071	4.52492	2.38032	2.48732	3.16299	2.54452	1.80976	2.29482	2.38464	1.87728	2.01129	1.47443	1.45242	1.37375	1.47721	1.308	1.13042	1.15319	1.21327	1.01023	1.1358	1.29606	0.986533	1.56991	1.57649
simsample48	-54.1	5670340	3.43243	2.53175	0.003975	0.003975	5.93975	5.66842	0.113857	5	3.29692	3.14082	3.49657	3.43127	3.81172	4.0362	3.57526	3.69329	3.62086	3.00151	3.96678	3.88053	3.82605	3.74433	3.99101	4.21437	2.29232	2.43462	3.06281	2.48648	1.74534	2.21308	2.3225	1.83489	1.96544	1.44199	1.43031	1.34633	1.45122	1.27788	1.10043	1.11541	1.17591	0.977154	1.09798	1.26168	0.949743	1.50628	1.52099
simsample49	-45.25	4603290	3.36577	2.74841	0.00384464	0.00384464	5.69721	5.87209	0.0755811	5	3.66526	3.58032	3.86059	3.75372	4.28153	4.36229	3.99964	4.1019	3.98261	3.41651	4.43089	4.22724	4.24608	4.06974	4.42743	4.54459	2.38945	2.4861	3.15942	2.54131	1.82138	2.30297	2.38764	1.88749	2.02077	1.48584	1.45998	1.38314	1.4855	1.31931	1.14447	1.16983	1.22956	1.02657	1.15289	1.31331	1.00694	1.59758	1.60346
simsample50	-52.3	4498500	3.3451	2.73224	0.00393409	0.00393409	5.85685	5.88155	0.105145	5	3.34272	3.20243	3.53967	3.48209	3.88972	4.07422	3.63103	3.73772	3.65552	3.05799	3.99997	3.90049	3.85855	3.76362	4.01854	4.21844	2.30745	2.44073	3.05962	2.48703	1.76293	2.22458	2.33051	1.85537	1.98478	1.46333	1.44722	1.36445	1.46854	1.29816	1.12417	1.14182	1.20239	1.00337	1.12548	1.2919	0.982234	1.54961	1.56561
simsample51	-58.55	4442620	3.3479	2.66095	0.00394591	0.00394591	5.91655	6.06595	0.113064	5	3.26928	3.11614	3.46728	3.41829	3.79931	4.00974	3.54712	3.65617	3.58248	2.97507	3.90809	3.82984	3.7741	3.69668	3.93085	4.1502	2.28527	2.42844	3.03819	2.47399	1.74611	2.20506	2.31654	1.84473	1.974	1.4545	1.44127	1.35706	1.46195	1.29011	1.11585	1.13158	1.19251	0.994237	1.11553	1.28341	0.972259	1.53456	1.55264
simsample52	-57.6	4265160	3.30699	2.7433	0.00392139	0.00392139	6.17325	5.78567	0.102993	5	3.35204	3.21624	3.54882	3.49419	3.91089	4.08306	3.64311	3.74623	3.66113	3.06865	4.00636	3.9022	3.86351	3.76465	4.02231	4.21559	2.30747	2.43955	3.05626	2.48453	1.76531	2.22564	2.33154	1.86053	1.99015	1.46859	1.45129	1.36884	1.47307	1.3034	1.1307	1.1492	1.20996	1.01075	1.13345	1.30152	0.992099	1.5642	1.58074
simsample53	-52.8	4415210	3.31411	2.61874	0.00395368	0.00395368	5.7451	5.8089	0.114536	5	3.26319	3.1079	3.46271	3.41906	3.79949	4.01084	3.5403	3.64788	3.57466	2.96391	3.89614	3.82127	3.76252	3.68806	3.91802	4.14054	2.28545	2.43253	3.04021	2.47692	1.748	2.2072	2.32164	1.85229	1.98251	1.461	1.44794	1.36305	1.46899	1.29634	1.12232	1.13812	1.19969	1.00065	1.12279	1.2937	0.980541	1.54799	1.56754
simsample54	-50.1	4338550	3.32657	2.77127	0.00391252	0.00391252	5.82093	5.83414	0.0957206	5	3.42313	3.29988	3.61886	3.55158	3.9939	4.14359	3.72427	3.82702	3.73387	3.14959	4.10245	3.97503	3.95049	3.8332	4.11422	4.28861	2.32478	2.447	3.07609	2.49435	1.77687	2.24118	2.34108	1.86378	1.99376	1.47039	1.45086	1.37005	1.47338	1.30508	1.13215	1.15232	1.21258	1.01292	1.13612	1.30148	0.993799	1.56853	1.58225
simsample55	-48.4	4357210	3.31605	2.65849	0.00388831	0.00388831	5.63441	5.82567	0.0945592	5	3.46552	3.34418	3.66412	3.59225	4.04814	4.19284	3.77174	3.87547	3.77902	3.18798	4.16194	4.02392	4.00252	3.87817	4.17024	4.34121	2.33862	2.46181	3.10235	2.51131	1.78724	2.25815	2.35894	1.87559	2.00813	1.47839	1.45857	1.37761	1.48238	1.31274	1.13862	1.15962	1.22065	1.01901	1.14393	1.31139	1.00061	1.58405	1.59733
simsample56	-49.95	5112470	3.40408	2.61559	0.0038709	0.0038709	6.14154	5.95982	0.0981394	5	3.52029	3.38843	3.72302	3.63961	4.08731	4.25952	3.82674	3.94116	3.84833	3.23535	4.24284	4.10795	4.0814	3.96009	4.25663	4.44269	2.3827	2.50903	3.16936	2.56293	1.81438	2.29788	2.39943	1.89609	2.03054	1.49102	1.47316	1.39033	1.49642	1.32234	1.14218	1.16178	1.22332	1.01856	1.14434	1.31035	0.993924	1.57677	1.58835
simsample57	-50.65	5032720	3.3893	2.60584	0.00387301	0.00387301	6.15457	5.76414	0.0880392	5	3.5622	3.45198	3.76108	3.66505	4.14739	4.27817	3.8789	3.98818	3.88385	3.29305	4.30515	4.1371	4.13149	3.9847	4.30992	4.46355	2.36385	2.47634	3.1413	2.53154	1.79988	2.2806	2.374	1.87386	2.00753	1.47314	1.45209	1.37277	1.47667	1.30733	1.1308	1.15294	1.21333	1.01086	1.13616	1.2985	0.98861	1.57147	1.5801
simsample58	-50.6	4320410	3.33389	2.75829	0.00392169	0.00392169	5.74373	5.96376	0.0965141	5	3.42836	3.3032	3.62487	3.55701	3.9978	4.15165	3.72934	3.8333	3.74081	3.15299	4.10993	3.98377	3.95788	3.8417	4.12233	4.29946	2.33029	2.45363	3.0849	2.50141	1.78053	2.2465	2.347	1.86748	1.99787	1.47295	1.45374	1.37258	1.47626	1.30723	1.13353	1.15352	1.21396	1.01376	1.13721	1.30285	0.994081	1.5695	1.58323
simsample59	-49.55	4967770	3.37135	2.75853	0.0039339	0.0039339	5.9571	5.61002	0.108025	5	3.34097	3.19424	3.53887	3.48203	3.87911	4.07806	3.62689	3.73664	3.65791	3.05313	3.99699	3.90639	3.85901	3.77072	4.01923	4.22892	2.3202	2.45654	3.07675	2.50319	1.7715	2.2353	2.3427	1.86353	1.99299	1.46948	1.45443	1.37055	1.47508	1.30297	1.12704	1.14373	1.20449	1.0046	1.12668	1.29304	0.981362	1.54703	1.56325
simsample60	-48.9	4343160	3.34124	2.8144	0.00389185	0.00389185	5.63922	5.85097	0.0855227	5	3.48992	3.38653	3.68223	3.59934	4.07498	4.18895	3.80271	3.90286	3.79875	3.23312	4.19581	4.03651	4.03249	3.89006	4.20099	4.34597	2.32677	2.4345	3.0734	2.48406	1.77684	2.24172	2.33275	1.85278	1.98204	1.46103	1.4384	1.36054	1.46177	1.29699	1.12572	1.14813	1.20723	1.00874	1.13164	1.29239	0.989882	1.56411	1.57413
simsample61	-52.6	4845100	3.3823	2.8202	0.00398355	0.00398355	5.79718	5.72235	0.109619	5	3.26293	3.11587	3.45646	3.40327	3.78418	3.98626	3.54092	3.64914	3.57435	2.9808	3.8992	3.81782	3.76804	3.68666	3.92367	4.13438	2.27785	2.41264	3.01715	2.45759	1.73915	2.19261	2.29839	1.82921	1.95532	1.44298	1.42865	1.3459	1.44816	1.27904	1.1061	1.12182	1.18126	0.985386	1.1046	1.26729	0.961656	1.51335	1.52961
simsample62	-51.7	4793550	3.34731	2.79754	0.00403799	0.00403799	5.7762	5.47873	0.120003	5	3.15695	2.99451	3.35109	3.31662	3.66319	3.89287	3.42134	3.52865	3.46443	2.86331	3.75562	3.70561	3.63726	3.5807	3.78506	4.01953	2.24864	2.39714	2.98152	2.43827	1.72007	2.16635	2.28053	1.82258	1.94792	1.43946	1.4282	1.34325	1.44664	1.27604	1.10398	1.11744	1.17754	0.982654	1.10103	1.26766	0.960159	1.50794	1.52847
simsample63	-55.1	4396610	3.36484	2.80283	0.00388164	0.00388164	6.01909	6.07324	0.088135	5	3.48964	3.38027	3.68326	3.59983	4.06682	4.19402	3.80003	3.90338	3.80221	3.22863	4.19689	4.0441	4.0354	3.89815	4.20484	4.35847	2.33582	2.44628	3.0878	2.49643	1.78202	2.2494	2.34175	1.85748	1.98706	1.46393	1.44232	1.3636	1.4653	1.29903	1.12609	1.1477	1.20701	1.00783	1.13079	1.29153	0.987183	1.56021	1.57036
simsample64	-51.1	5091910	3.38788	2.62061	0.00388208	0.00388208	6.17797	5.77373	0.100503	5	3.46617	3.33124	3.66758	3.59129	4.02705	4.20413	3.76707	3.87965	3.79013	3.18016	4.171	4.04624	4.01471	3.90128	4.18588	4.37676	2.35827	2.48732	3.13652	2.53946	1.79732	2.27499	2.37819	1.88253	2.01585	1.48127	1.46415	1.38135	1.48704	1.31391	1.13548	1.1545	1.21584	1.01272	1.13751	1.3038	0.989083	1.56775	1.58059
simsample65	-50.25	4187840	3.29591	2.80036	0.00389695	0.00389695	6.01868	5.70535	0.0912865	5	3.45991	3.3452	3.65521	3.58687	4.04708	4.17727	3.7677	3.86684	3.76812	3.19122	4.1451	4.00554	3.98881	3.86159	4.15304	4.31493	2.33436	2.45246	3.0841	2.49943	1.78634	2.25123	2.34929	1.87344	2.00386	1.47905	1.45759	1.37746	1.48078	1.31334	1.14132	1.16288	1.22321	1.02288	1.14695	1.31324	1.00594	1.58684	1.60013
simsample66	-47.7	4569650	3.38452	2.8102	0.00384663	0.00384663	5.82007	6.03063	0.0740585	5	3.66426	3.58228	3.85758	3.74774	4.27549	4.35289	3.99846	4.10074	3.98088	3.42103	4.43014	4.22435	4.24624	4.0676	4.42753	4.5406	2.38618	2.4789	3.15039	2.5338	1.81752	2.29685	2.37886	1.87924	2.01106	1.47931	1.45305	1.37685	1.47799	1.31299	1.13865	1.16393	1.22297	1.02115	1.14649	1.30438	1.00053	1.58585	1.59087
simsample67	-53.9	4385920	3.33399	2.82731	0.00396448	0.00396448	5.93391	5.90242	0.114832	5	3.25258	3.09574	3.4495	3.41018	3.78014	3.9957	3.52779	3.63466	3.56376	2.95907	3.87124	3.80679	3.74594	3.67735	3.89786	4.12346	2.29669	2.44169	3.04067	2.48361	1.75718	2.21207	2.325	1.85869	1.98634	1.46835	1.45495	1.3696	1.4743	1.30198	1.12771	1.14276	1.20372	1.00522	1.12621	1.29526	0.983647	1.54482	1.56465
simsample68	-55.05	4937180	3.4143	2.82721	0.00395052	0.00395052	5.95797	5.92317	0.100538	5	3.36539	3.23268	3.55864	3.48739	3.9007	4.07758	3.65603	3.76545	3.68073	3.09344	4.03848	3.92712	3.89478	3.78986	4.05826	4.247	2.3072	2.42986	3.0539	2.4783	1.75812	2.21894	2.3173	1.83688	1.96385	1.44715	1.4301	1.34914	1.45054	1.28246	1.10845	1.12614	1.18504	0.988067	1.10816	1.26747	0.963088	1.51876	1.53115
simsample69	-50.35	5221370	3.42467	2.66982	0.00390647	0.00390647	6.06378	5.88472	0.0894685	5	3.55609	3.44195	3.75421	3.65689	4.1286	4.27007	3.86968	3.98172	3.88041	3.28794	4.2969	4.13595	4.12748	3.98547	4.30591	4.46561	2.37062	2.48265	3.1467	2.53771	1.80281	2.28319	2.37575	1.87295	2.00532	1.472	1.45152	1.37176	1.47495	1.30519	1.12757	1.14874	1.20864	1.00655	1.13088	1.29105	0.98172	1.55819	1.56631
simsample70	-48	4999830	3.39529	2.62323	0.0038431	0.0038431	6.00828	5.82084	0.0831731	5	3.60661	3.50608	3.80442	3.70028	4.2008	4.31402	3.92996	4.03826	3.92809	3.34482	4.3652	4.18047	4.1852	4.02528	4.36662	4.50589	2.3721	2.47787	3.14955	2.53417	1.80529	2.28771	2.37709	1.87421	2.0079	1.47303	1.45039	1.37224	1.47543	1.30728	1.13106	1.15434	1.21434	1.01186	1.13739	1.29804	0.989731	1.57413	1.58103
simsample71	-52.8	4787300	3.35096	2.80619	0.00403799	0.00403799	5.76267	5.47127	0.116382	5	3.17229	3.01618	3.36511	3.32572	3.68229	3.9001	3.43973	3.54604	3.47847	2.88395	3.77824	3.71822	3.65644	3.59201	3.80551	4.03026	2.24422	2.38743	2.97412	2.42922	1.7161	2.1617	2.27263	1.81472	1.93962	1.43296	1.42061	1.33691	1.43938	1.27037	1.0993	1.11354	1.17313	0.979064	1.09712	1.26189	0.956809	1.5035	1.52272
simsample72	-49.65	4334210	3.32106	2.78481	0.00391252	0.00391252	5.74956	5.84267	0.100924	5	3.39916	3.2655	3.59679	3.53797	3.96348	4.13196	3.69516	3.7993	3.71164	3.11741	4.06479	3.95456	3.91939	3.81522	4.08061	4.27066	2.33337	2.46308	3.08761	2.50893	1.78435	2.24911	2.35366	1.87682	2.00716	1.48143	1.46334	1.38066	1.48521	1.31462	1.14027	1.15925	1.22021	1.01938	1.14297	1.311	0.9999	1.57587	1.59161
simsample73	-52.75	4608020	3.37482	2.81854	0.00395106	0.00395106	5.81813	6.00162	0.106912	5	3.32913	3.18486	3.52507	3.46837	3.86457	4.05935	3.61438	3.72291	3.64392	3.04576	3.98043	3.88969	3.84415	3.75517	4.00303	4.20926	2.31202	2.44557	3.06127	2.49141	1.76534	2.2257	2.33128	1.85529	1.98337	1.46357	1.44808	1.36482	1.4683	1.29754	1.12269	1.13939	1.19958	1.00093	1.12212	1.28684	0.977641	1.53919	1.55508
simsample74	-52.95	4344000	3.35714	2.83206	0.00390792	0.00390792	6.0296	6.099	0.0948692	5	3.43557	3.31303	3.63038	3.5591	4.00071	4.15179	3.7373	3.84167	3.74845	3.16559	4.11932	3.9908	3.96797	3.84921	4.13274	4.30619	2.33286	2.45219	3.08335	2.50003	1.78121	2.24603	2.34377	1.8634	1.99256	1.46979	1.45012	1.36948	1.47209	1.30392	1.13024	1.1502	1.21003	1.01056	1.13324	1.2964	0.989596	1.56062	1.57334
simsample75	-56.8	4733360	3.37938	2.78649	0.00400266	0.00400266	5.84399	5.7266	0.0998206	5	3.31008	3.18166	3.50074	3.43367	3.84632	4.01308	3.59752	3.70253	3.61742	3.04108	3.96971	3.85729	3.8265	3.72138	3.98639	4.16873	2.26429	2.38591	2.99838	2.43291	1.72748	2.18022	2.27812	1.80893	1.93465	1.42584	1.40864	1.32916	1.42948	1.26444	1.09427	1.11234	1.17072	0.976699	1.09558	1.25441	0.954473	1.50613	1.51917
simsample76	-55.35	4178290	3.30165	2.78789	0.00395078	0.00395078	6.04641	5.87364	0.111184	5	3.28469	3.13439	3.48224	3.44123	3.82758	4.0272	3.56516	3.66942	3.59362	2.99229	3.91115	3.83486	3.78034	3.70273	3.93359	4.14906	2.3014	2.44367	3.04684	2.48562	1.762	2.21844	2.33042	1.86459	1.99328	1.47316	1.45827	1.37357	1.47861	1.30692	1.13351	1.14988	1.2111	1.01195	1.13399	1.30447	0.992695	1.56071	1.58029
simsample77	-57	4846200	3.37568	2.85631	0.00404658	0.00404658	5.82364	5.591	0.116625	5	3.15644	3.00012	3.34758	3.30672	3.6576	3.87838	3.42191	3.52913	3.46297	2.87159	3.76007	3.70249	3.64057	3.5777	3.78913	4.01446	2.23713	2.37861	2.96265	2.4206	1.7097	2.15307	2.26242	1.80496	1.92853	1.42513	1.41305	1.3297	1.43117	1.26292	1.09206	1.10582	1.16479	0.971866	1.08879	1.25115	0.948115	1.4885	1.50702
simsample78	-56.15	4202390	3.32051	2.79217	0.00391545	0.00391545	6.05059	5.91321	0.0969189	5	3.38765	3.26301	3.58203	3.51854	3.95287	4.10513	3.68502	3.78669	3.69565	3.1147	4.05571	3.9344	3.90733	3.79467	4.06849	4.24514	2.30821	2.43121	3.05267	2.47735	1.76489	2.22486	2.32512	1.85288	1.9817	1.46235	1.44319	1.36255	1.46529	1.29789	1.12622	1.14596	1.20589	1.0076	1.12987	1.29471	0.988815	1.55928	1.57356
simsample79	-47.1	4344320	3.33785	2.81245	0.00386701	0.00386701	5.75155	5.97155	0.0909801	5	3.51501	3.39867	3.71234	3.63655	4.10119	4.2375	3.82674	3.93023	3.83054	3.24512	4.21796	4.07426	4.05877	3.9281	4.22744	4.39147	2.36837	2.48551	3.12985	2.53458	1.80929	2.28178	2.37896	1.8919	2.02355	1.49238	1.47102	1.39015	1.49415	1.32457	1.14928	1.17077	1.23147	1.0289	1.15399	1.31975	1.00927	1.59305	1.6052
simsample80	-51.35	4952750	3.39427	2.8507	0.0039877	0.0039877	5.82403	5.69032	0.105637	5	3.30538	3.16442	3.49851	3.4387	3.83267	4.02372	3.58869	3.69698	3.61808	3.02818	3.95486	3.86196	3.81939	3.72863	3.9777	4.17915	2.29165	2.42104	3.03248	2.46703	1.74857	2.2045	2.30703	1.8339	1.96011	1.44631	1.43069	1.34865	1.45044	1.28185	1.10854	1.12509	1.18427	0.98795	1.10748	1.26873	0.963779	1.51698	1.53173
simsample81	-52.9	4398360	3.33109	2.82644	0.00396448	0.00396448	5.94369	5.91166	0.118765	5	3.23754	3.07347	3.43597	3.4022	3.76085	3.98995	3.50944	3.6175	3.55037	2.93812	3.84803	3.79507	3.7268	3.66713	3.8773	4.11399	2.30369	2.45453	3.05104	2.49563	1.76315	2.21894	2.33546	1.86886	1.99699	1.47679	1.46457	1.37776	1.48349	1.3093	1.1338	1.14796	1.2095	1.00999	1.13136	1.3025	0.988067	1.55054	1.57183
simsample82	-52.35	4504360	3.34335	2.70502	0.00393409	0.00393409	5.78856	5.86676	0.106334	5	3.32492	3.18307	3.52183	3.46545	3.86895	4.05665	3.61115	3.71798	3.63708	3.03884	3.97891	3.88212	3.8383	3.74583	3.99769	4.1999	2.29814	2.43284	3.0496	2.47909	1.75583	2.21638	2.32308	1.84932	1.97864	1.45834	1.44272	1.35995	1.46404	1.29378	1.12016	1.13754	1.1981	0.999572	1.12139	1.28786	0.978503	1.54445	1.56073
simsample83	-51.8	4384900	3.36256	2.79805	0.00389485	0.00389485	5.75492	6.09906	0.0915232	5	3.46535	3.3493	3.65987	3.58166	4.03675	4.17621	3.77163	3.87589	3.77856	3.19924	4.16306	4.02142	4.0058	3.87724	4.17348	4.33704	2.33456	2.44961	3.08737	2.49899	1.78152	2.24836	2.34347	1.86026	1.98989	1.4664	1.44585	1.36617	1.46845	1.3011	1.12764	1.14846	1.20808	1.00864	1.13157	1.29357	0.987746	1.56021	1.57153
simsample84	-52.85	4640950	3.37961	2.80269	0.00395106	0.00395106	5.82089	5.99645	0.104266	5	3.34874	3.20928	3.54424	3.48258	3.88806	4.07416	3.63704	3.74538	3.66349	3.06862	4.00927	3.90932	3.86911	3.77315	4.02987	4.22873	2.31207	2.44201	3.06187	2.48885	1.7646	2.2259	2.32927	1.85162	1.97983	1.46007	1.44386	1.36141	1.46447	1.29453	1.12	1.13733	1.19728	0.998843	1.12007	1.28366	0.975587	1.53749	1.55229
simsample85	-54.7	4387290	3.33959	2.81917	0.00396448	0.00396448	5.91771	5.8903	0.109035	5	3.2799	3.13371	3.47491	3.42682	3.81442	4.01024	3.56051	3.66593	3.58926	2.99473	3.9126	3.83045	3.78067	3.69842	3.93518	4.14452	2.28907	2.42574	3.02973	2.46915	1.75032	2.20477	2.31259	1.84569	1.97293	1.45734	1.44226	1.35893	1.46229	1.29247	1.1197	1.13608	1.19629	0.998986	1.11959	1.28577	0.977828	1.53787	1.55551
simsample86	-53.85	5389830	3.43627	2.68685	0.00395988	0.00395988	6.00888	5.7923	0.104204	5	3.35778	3.21824	3.5536	3.47937	3.88534	4.07772	3.64553	3.75957	3.67806	3.0782	4.03965	3.93159	3.894	3.79335	4.06045	4.25897	2.30515	2.43305	3.06398	2.4841	1.75449	2.21999	2.32098	1.83425	1.96279	1.44264	1.42737	1.34567	1.44816	1.27822	1.1025	1.11937	1.17869	0.98097	1.10134	1.26113	0.954234	1.50975	1.52193
simsample87	-45	4594670	3.36735	2.74417	0.0038218	0.0038218	5.70636	5.86402	0.0683893	5	3.73445	3.66527	3.92851	3.80929	4.36769	4.41972	4.08002	4.18033	4.05145	3.49664	4.52591	4.29467	4.32983	4.13222	4.51607	4.6102	2.40049	2.48792	3.17249	2.54524	1.82912	2.31404	2.39327	1.88894	2.02286	1.48633	1.45815	1.38305	1.48473	1.32014	1.14577	1.17303	1.23239	1.02907	1.15609	1.3147	1.01012	1.60506	1.60846
simsample88	-55.5	4886630	3.36712	2.83053	0.00408376	0.00408376	5.6407	5.54604	0.13052	5	3.0393	2.86257	3.23152	3.20928	3.51606	3.77728	3.28865	3.3978	3.34546	2.74107	3.60517	3.58585	3.5008	3.46837	3.6419	3.89911	2.21178	2.37047	2.93505	2.40951	1.69266	2.13035	2.24966	1.80027	1.92315	1.42257	1.41492	1.32848	1.43145	1.26028	1.08875	1.09923	1.15896	0.966602	1.08242	1.2484	0.942032	1.47572	1.49861
simsample89	-51	5323810	3.42788	2.71715	0.00391708	0.00391708	6.05405	5.86909	0.102419	5	3.44588	3.30647	3.64561	3.56942	3.99038	4.17985	3.74233	3.85745	3.77208	3.16245	4.14381	4.02941	3.99397	3.88758	4.16397	4.3621	2.36052	2.48912	3.13416	2.54081	1.79719	2.2727	2.37489	1.87821	2.00951	1.47783	1.46144	1.37823	1.48281	1.30958	1.13032	1.14807	1.20868	1.00647	1.12974	1.29316	0.979861	1.54939	1.56175
simsample90	-56.65	5360110	3.43112	2.6763	0.00395988	0.00395988	6.02561	5.70796	0.0997652	5	3.37273	3.2422	3.56686	3.48698	3.90704	4.08216	3.66429	3.77626	3.69001	3.09959	4.063	3.94094	3.91218	3.80081	4.08	4.26481	2.29453	2.41625	3.04889	2.4678	1.74597	2.20994	2.30726	1.82212	1.95022	1.43276	1.41616	1.33608	1.43752	1.26979	1.0958	1.11375	1.17251	0.976023	1.09607	1.25406	0.95031	1.50518	1.51607
simsample91	-60.8	5348120	3.42798	2.66059	0.00402301	0.00402301	6.08677	5.89016	0.124303	5	3.1793	3.00711	3.37692	3.33191	3.66915	3.92518	3.44262	3.5599	3.50013	2.87899	3.80236	3.75517	3.68099	3.62835	3.83568	4.0849	2.26891	2.42262	3.02494	2.4698	1.73082	2.18823	2.30414	1.8289	1.95654	1.4403	1.43164	1.34537	1.45016	1.27573	1.09876	1.1108	1.17125	0.974145	1.0929	1.25794	0.945887	1.49157	1.51006
simsample92	-60.7	5378510	3.43665	2.68102	0.00402301	0.00402301	6.04385	5.89416	0.121583	5	3.18869	3.02122	3.38492	3.33576	3.67921	3.9269	3.45377	3.57056	3.50858	2.89315	3.8168	3.7626	3.69344	3.63515	3.84906	4.09102	2.26498	2.4141	3.01756	2.46169	1.72698	2.18335	2.29634	1.82115	1.94805	1.43389	1.4244	1.33912	1.44293	1.2699	1.09371	1.10621	1.1661	0.96988	1.0881	1.25111	0.941418	1.48465	1.50197
simsample93	-54.4	4844660	3.35782	2.815	0.00403627	0.00403627	5.92589	5.51981	0.120999	5	3.15067	2.98638	3.34467	3.31057	3.65277	3.88699	3.41386	3.52202	3.45913	2.85688	3.74766	3.70095	3.63088	3.57677	3.77841	4.01579	2.24954	2.39879	2.98242	2.43998	1.72047	2.16663	2.28105	1.82255	1.94762	1.43942	1.42855	1.34336	1.44669	1.27578	1.10331	1.11639	1.17643	0.981575	1.0997	1.26593	0.958304	1.50434	1.52488
simsample94	-60.9	5362990	3.4443	2.6899	0.00402807	0.00402807	6.02749	5.88878	0.112584	5	3.24433	3.09219	3.43836	3.37606	3.7468	3.96542	3.51802	3.63293	3.56199	2.96	3.8946	3.81399	3.76141	3.68243	3.92134	4.13953	2.26439	2.40082	3.01301	2.44994	1.72442	2.1812	2.28658	1.80925	1.93557	1.42348	1.41118	1.32858	1.43054	1.26076	1.08634	1.10083	1.15971	0.964725	1.0827	1.24191	0.936886	1.4799	1.49414
simsample95	-53.05	4368840	3.3464	2.72662	0.00392706	0.00392706	5.74279	6.03033	0.0999965	5	3.37994	3.24915	3.57588	3.5106	3.93627	4.10279	3.67441	3.77984	3.69192	3.10182	4.0519	3.93577	3.90386	3.79604	4.06664	4.25214	2.30935	2.43592	3.06113	2.48353	1.76373	2.22657	2.32852	1.85154	1.98109	1.45979	1.44209	1.36076	1.46411	1.29528	1.12207	1.14098	1.20116	1.00242	1.1247	1.28944	0.981787	1.55071	1.56496
simsample96	-53.9	4468600	3.35339	2.77295	0.00392494	0.00392494	6.02887	6.13802	0.114189	5	3.3226	3.16386	3.52344	3.47795	3.85796	4.07764	3.60395	3.71469	3.64173	3.02414	3.9629	3.892	3.83205	3.75876	3.98927	4.21732	2.3375	2.48394	3.09965	2.5286	1.78674	2.2523	2.3662	1.88733	2.01784	1.48957	1.47613	1.38964	1.4962	1.32074	1.14276	1.1582	1.22015	1.01804	1.14121	1.31213	0.994999	1.56558	1.58467
simsample97	-52.5	4201860	3.29259	2.79631	0.00392328	0.00392328	5.98476	5.65476	0.101265	5	3.34264	3.21068	3.53761	3.48463	3.9038	4.0675	3.63401	3.73453	3.64819	3.0636	3.99103	3.88519	3.8492	3.74848	4.00619	4.19399	2.29885	2.42827	3.03976	2.472	1.75994	2.2165	2.32097	1.85476	1.98326	1.46505	1.44694	1.36515	1.46853	1.30036	1.12922	1.14805	1.20837	1.01024	1.13235	1.29973	0.992633	1.56293	1.57946
simsample98	-59.85	5474370	3.40927	2.48384	0.00404269	0.00404269	5.99015	5.7228	0.133059	5	3.09971	2.91608	3.29939	3.26308	3.57873	3.85735	3.35339	3.47214	3.41974	2.78748	3.70769	3.67731	3.58985	3.55257	3.74197	4.00887	2.23492	2.40109	2.99592	2.44841	1.70594	2.16166	2.28496	1.81395	1.94292	1.42748	1.42213	1.33455	1.44103	1.265	1.08834	1.09885	1.16013	0.963632	1.08222	1.25053	0.936087	1.48065	1.50172
simsample99	-51.2	4949140	3.36982	2.71866	0.0039339	0.0039339	6.04802	5.61766	0.107107	5	3.3387	3.19428	3.53628	3.47723	3.87792	4.07269	3.62509	3.73455	3.65471	3.05187	3.99819	3.90304	3.85792	3.76659	4.01887	4.22494	2.31099	2.44608	3.06719	2.49335	1.76413	2.22753	2.33411	1.85539	1.98492	1.46249	1.44731	1.36404	1.46832	1.29697	1.12174	1.13871	1.1993	1.00002	1.12192	1.2877	0.977107	1.54218	1.55794
simsample100	-55.75	4431030	3.34089	2.75233	0.00400224	0.00400224	5.6452	5.89118	0.113566	5	3.2311	3.07824	3.42644	3.38254	3.75521	3.96488	3.50528	3.61197	3.54006	2.9408	3.85378	3.78251	3.72537	3.65248	3.87816	4.09756	2.2692	2.4113	3.0097	2.45455	1.73503	2.18732	2.2981	1.83376	1.96086	1.44736	1.43402	1.35015	1.45382	1.28357	1.11107	1.12639	1.18669	0.990282	1.11021	1.27688	0.968753	1.52494	1.54363
simsample101	-50.7	4401560	3.33494	2.77881	0.00391036	0.00391036	5.95209	5.84268	0.0935583	5	3.4584	3.3385	3.65454	3.5827	4.03442	4.17815	3.76372	3.86696	3.77102	3.18692	4.14856	4.01337	3.99314	3.86966	4.15917	4.32848	2.33907	2.45868	3.09422	2.50701	1.78708	2.25448	2.35284	1.87149	2.00205	1.47613	1.45589	1.37527	1.4787	1.31015	1.13643	1.15715	1.21747	1.01693	1.14072	1.30574	0.997435	1.57487	1.58771
simsample102	-62.85	5456090	3.43595	2.47071	0.00402428	0.00402428	5.88246	6.00375	0.126783	5	3.15342	2.97881	3.35245	3.30336	3.63812	3.90103	3.41389	3.53387	3.47566	2.84794	3.78537	3.73547	3.65928	3.60701	3.81665	4.06922	2.2435	2.40082	3.00779	2.45096	1.70985	2.16918	2.28684	1.80923	1.93835	1.42204	1.41496	1.32909	1.43448	1.25993	1.08322	1.09498	1.15556	0.959218	1.07779	1.24272	0.930602	1.47489	1.49292
simsample103	-55.1	4451640	3.32533	2.64285	0.0039914	0.0039914	5.70749	5.89527	0.12343	5	3.18354	3.01399	3.38305	3.3508	3.69849	3.93938	3.44903	3.55871	3.49549	2.87698	3.79036	3.74295	3.66854	3.6154	3.81892	4.06368	2.27025	2.42739	3.02143	2.4697	1.73691	2.19164	2.31163	1.84695	1.97595	1.45751	1.44742	1.36055	1.46695	1.29259	1.11792	1.13128	1.19305	0.994783	1.11567	1.28765	0.97311	1.53295	1.55502
simsample104	-54.25	4416160	3.34324	2.72957	0.00389605	0.00389605	6.0602	5.94256	0.0956237	5	3.43809	3.31462	3.63465	3.56309	4.0078	4.15946	3.7403	3.84505	3.75144	3.16361	4.12667	3.99567	3.97208	3.85251	4.13816	4.31258	2.32971	2.45169	3.08649	2.50052	1.77912	2.24635	2.34586	1.86421	1.99486	1.46959	1.45031	1.36952	1.47308	1.30425	1.13041	1.15059	1.21093	1.0108	1.13426	1.29913	0.990693	1.56588	1.5789
simsample105	-54.75	4919680	3.40908	2.90127	0.00402296	0.00402296	5.74569	5.82645	0.11064	5	3.23157	3.08311	3.42268	3.3698	3.73982	3.94749	3.50551	3.61448	3.54251	2.95352	3.85976	3.78489	3.73341	3.65649	3.88728	4.10054	2.26606	2.39941	2.99748	2.44382	1.72922	2.17843	2.2827	1.81587	1.93987	1.43262	1.41876	1.33628	1.43717	1.26908	1.09669	1.11155	1.17015	0.976018	1.09354	1.25331	0.950537	1.49312	1.5089
simsample106	-50.1	4336990	3.30551	2.65386	0.00394142	0.00394142	5.60691	5.66578	0.0958181	5	3.39699	3.27546	3.59269	3.52525	3.96976	4.11522	3.69664	3.79826	3.70466	3.12184	4.07649	3.94509	3.92138	3.80246	4.08518	4.25665	2.29822	2.42148	3.04895	2.46949	1.75715	2.21961	2.32015	1.84639	1.97682	1.45573	1.43652	1.35652	1.45987	1.2927	1.12155	1.14199	1.2022	1.00377	1.12672	1.29242	0.986153	1.56065	1.57442
simsample107	-52.05	4404150	3.35906	2.68511	0.00388718	0.00388718	5.7322	6.16989	0.0908851	5	3.50799	3.39277	3.70556	3.62228	4.08918	4.2264	3.81893	3.92494	3.82487	3.23734	4.22355	4.07238	4.05913	3.92437	4.23109	4.3928	2.35023	2.46662	3.11648	2.51835	1.79282	2.26675	2.36288	1.87258	2.0048	1.47465	1.45403	1.37406	1.47781	1.30886	1.13383	1.1553	1.21571	1.01418	1.1388	1.30273	0.99353	1.57414	1.58499
simsample108	-56.15	5325650	3.42995	2.66992	0.00395988	0.00395988	6.10822	5.76521	0.101475	5	3.36785	3.23391	3.56285	3.48526	3.90066	4.08202	3.65816	3.77081	3.6862	3.09173	4.0553	3.93816	3.90602	3.79853	4.0734	4.26335	2.29838	2.42275	3.05507	2.47415	1.74921	2.214	2.31295	1.82722	1.95569	1.43689	1.4208	1.34009	1.44206	1.27343	1.0988	1.1164	1.17546	0.978403	1.09871	1.25769	0.952515	1.5084	1.51987
simsample109	-56.35	5307770	3.41808	2.70572	0.00398898	0.00398898	6.13881	5.8402	0.12109	5	3.24118	3.07201	3.44053	3.39346	3.74443	3.99225	3.5112	3.62799	3.56418	2.94081	3.87467	3.81992	3.74995	3.69059	3.90672	4.15104	2.3028	2.45428	3.06478	2.50136	1.75698	2.21952	2.3347	1.85454	1.98346	1.46118	1.4511	1.36439	1.47	1.29439	1.11589	1.12889	1.18993	0.990422	1.11087	1.27763	0.962779	1.5171	1.53542
simsample110	-55.2	4194960	3.30442	2.83474	0.00394785	0.00394785	5.94759	5.73198	0.105789	5	3.27898	3.13981	3.47248	3.42573	3.82336	4.00275	3.56187	3.66313	3.58296	2.99815	3.90844	3.81892	3.77464	3.68644	3.92775	4.12665	2.27735	2.41049	3.01035	2.45261	1.74334	2.1942	2.30041	1.83958	1.96624	1.45354	1.43704	1.35478	1.45749	1.28965	1.11922	1.13658	1.1965	1.00021	1.12069	1.28705	0.981569	1.54305	1.56071
simsample111	-49.65	5659370	3.4229	2.47088	0.00392582	0.00392582	5.98212	5.60938	0.099324	5	3.47129	3.33953	3.67298	3.58397	4.02647	4.20211	3.77266	3.88915	3.79806	3.18582	4.19876	4.06018	4.03386	3.91201	4.21079	4.39612	2.3395	2.46592	3.1254	2.52215	1.77901	2.25971	2.36045	1.85858	1.99259	1.45872	1.4422	1.36077	1.4659	1.29369	1.11538	1.13451	1.19529	0.993442	1.11754	1.28069	0.968004	1.54218	1.55262
simsample112	-47.55	4649800	3.36585	2.76747	0.00388828	0.00388828	5.82195	5.87842	0.0907247	5	3.52109	3.40515	3.71843	3.63637	4.10177	4.2404	3.83278	3.93883	3.83901	3.25186	4.23412	4.08604	4.07227	3.93884	4.24356	4.40668	2.36548	2.48114	3.13048	2.53201	1.80455	2.27882	2.37458	1.88333	2.01507	1.48399	1.46303	1.38259	1.48625	1.31678	1.14095	1.16228	1.22269	1.02053	1.14524	1.3091	0.999276	1.58002	1.59099
simsample113	-54.85	4268390	3.31306	2.58558	0.00394147	0.00394147	5.80094	5.99584	0.106539	5	3.3414	3.19949	3.54104	3.48501	3.89654	4.08142	3.62986	3.73631	3.65371	3.04924	4.00243	3.90063	3.85686	3.76173	4.018	4.21982	2.3011	2.43901	3.06139	2.48608	1.75905	2.2235	2.33269	1.85726	1.98885	1.46387	1.44827	1.36517	1.47078	1.29944	1.12556	1.14354	1.20495	1.00501	1.12833	1.29796	0.985767	1.56005	1.57694
simsample114	-52.35	4610500	3.36946	2.77023	0.00391638	0.00391638	5.87569	5.97494	0.100991	5	3.40176	3.26747	3.59878	3.53235	3.95476	4.12942	3.69683	3.80475	3.71803	3.12217	4.07758	3.96505	3.93097	3.82538	4.09492	4.28573	2.33139	2.45887	3.08839	2.5069	1.7794	2.24571	2.34803	1.8657	1.99555	1.47083	1.45342	1.37118	1.47496	1.30451	1.1292	1.14768	1.20807	1.00795	1.13065	1.29541	0.985554	1.55522	1.56931
simsample115	-49.75	4320400	3.32339	2.78804	0.00391174	0.00391174	5.72902	5.81944	0.096832	5	3.4109	3.2856	3.60655	3.54196	3.97942	4.1327	3.71032	3.81288	3.72116	3.13633	4.08448	3.96177	3.93481	3.82099	4.0973	4.27485	2.32313	2.44671	3.07281	2.49335	1.77605	2.23923	2.33997	1.8642	1.99388	1.47112	1.45186	1.37075	1.47412	1.30566	1.13281	1.15268	1.21297	1.01342	1.13646	1.30218	0.99436	1.5683	1.58254
simsample116	-57	4401540	3.34592	2.65631	0.00394964	0.00394964	5.82481	5.99179	0.0997057	5	3.36398	3.23491	3.55945	3.49185	3.91885	4.08283	3.65748	3.76289	3.6746	3.08626	4.03858	3.91854	3.88815	3.77823	4.05157	4.23426	2.2908	2.41677	3.04184	2.46527	1.74902	2.21063	2.312	1.8363	1.96585	1.44681	1.42935	1.34881	1.4518	1.284	1.11186	1.1309	1.19082	0.993233	1.11503	1.27889	0.972884	1.53964	1.55342
simsample117	-56.6	4176480	3.29764	2.75351	0.00394655	0.00394655	5.95188	5.8742	0.115308	5	3.24736	3.09058	3.44551	3.40967	3.78266	3.99492	3.52248	3.62755	3.556	2.94985	3.86325	3.79806	3.7364	3.66789	3.88772	4.11304	2.29074	2.43834	3.03615	2.47953	1.75415	2.20902	2.3241	1.86057	1.9892	1.46994	1.45647	1.37094	1.47646	1.30398	1.13052	1.14592	1.20738	1.00855	1.13026	1.30187	0.989166	1.55519	1.57607
simsample118	-58.8	4459960	3.35145	2.663	0.00394591	0.00394591	5.91142	6.05324	0.10887	5	3.30498	3.15887	3.50248	3.44713	3.84266	4.03965	3.58807	3.69648	3.61825	3.01555	3.95654	3.86527	3.81731	3.7297	3.97656	4.18511	2.29142	2.4292	3.04511	2.47587	1.75012	2.2108	2.31909	1.84481	1.97431	1.45414	1.43958	1.35641	1.4608	1.28994	1.11595	1.13269	1.19336	0.995004	1.11659	1.28322	0.973244	1.53737	1.55401
simsample119	-53.2	4751960	3.35334	2.81759	0.00403026	0.00403026	5.81629	5.55773	0.116293	5	3.19018	3.03329	3.3839	3.34419	3.70245	3.92151	3.45911	3.56605	3.49814	2.90073	3.7993	3.73912	3.6771	3.61235	3.82694	4.05285	2.25733	2.40103	2.99079	2.44302	1.72607	2.17398	2.28532	1.82484	1.95029	1.44102	1.42856	1.34441	1.44735	1.27745	1.10541	1.1197	1.17956	0.984462	1.1031	1.26856	0.961935	1.5112	1.53046
simsample120	-49.25	4389280	3.34108	2.70075	0.00389475	0.00389475	5.61727	5.87864	0.0834416	5	3.52865	3.42964	3.72273	3.6324	4.1232	4.22903	3.84665	3.94786	3.83973	3.2709	4.25431	4.08083	4.08247	3.93034	4.25547	4.39338	2.33289	2.43939	3.08957	2.49156	1.78054	2.25085	2.34118	1.85546	1.98671	1.46147	1.43845	1.36106	1.46305	1.29784	1.12591	1.1492	1.20867	1.00909	1.13313	1.29442	0.990519	1.57041	1.57932
simsample121	-55.9	4252750	3.30685	2.7537	0.00394054	0.00394054	5.92754	5.81	0.109027	5	3.29151	3.14553	3.48834	3.44269	3.83616	4.02831	3.57382	3.6779	3.59986	3.00215	3.92543	3.84099	3.79104	3.70753	3.94581	4.15461	2.29331	2.43239	3.03835	2.4755	1.75505	2.21147	2.32137	1.85494	1.98363	1.46477	1.44942	1.36571	1.4702	1.29964	1.12694	1.14383	1.20471	1.00628	1.12808	1.29713	0.987063	1.55404	1.57254
simsample122	-56.9	4775010	3.39453	2.79389	0.00396518	0.00396518	6.05182	5.97884	0.101468	5	3.37836	3.24356	3.57362	3.50525	3.92062	4.09917	3.67035	3.77944	3.69453	3.10176	4.0517	3.94168	3.90721	3.80352	4.07077	4.26248	2.31832	2.44421	3.07057	2.49248	1.7679	2.23144	2.3322	1.85071	1.97912	1.45845	1.4415	1.35976	1.46242	1.29296	1.11815	1.13605	1.19573	0.997193	1.11852	1.28059	0.973277	1.5354	1.54876
simsample123	-57.85	4359180	3.32548	2.78486	0.00396426	0.00396426	6.06484	5.85731	0.114308	5	3.24681	3.09165	3.44356	3.40356	3.77615	3.98806	3.52204	3.62825	3.55655	2.95344	3.8665	3.79902	3.73954	3.66905	3.89165	4.1146	2.28712	2.43164	3.03041	2.47379	1.74996	2.20413	2.31683	1.85183	1.97961	1.46259	1.44909	1.3642	1.4688	1.29712	1.12365	1.13896	1.19985	1.00188	1.12278	1.29179	0.98099	1.54223	1.56194
simsample124	-52.8	4799440	3.38251	2.80637	0.0039701	0.0039701	5.7763	5.76241	0.105955	5	3.2924	3.15171	3.48555	3.42676	3.8208	4.0106	3.57486	3.68239	3.60351	3.01414	3.93997	3.84665	3.8038	3.71322	3.96167	4.16259	2.28085	2.41109	3.02093	2.45703	1.74082	2.19569	2.29882	1.82778	1.95419	1.44136	1.42591	1.3441	1.44598	1.2778	1.10526	1.12191	1.18115	0.985292	1.10478	1.26651	0.961966	1.51546	1.53051
simsample125	-51.15	4237200	3.34191	2.83022	0.00385591	0.00385591	5.96523	6.07251	0.0844087	5	3.54889	3.44617	3.74357	3.65821	4.1443	4.25591	3.86761	3.96876	3.86194	3.29039	4.26718	4.10252	4.10061	3.95357	4.27188	4.41582	2.36236	2.47006	3.11897	2.5204	1.804	2.27561	2.36703	1.87995	2.01095	1.48256	1.4592	1.38046	1.48295	1.3161	1.14249	1.16546	1.22531	1.02399	1.14867	1.31134	1.00492	1.5876	1.59744
simsample126	-49.45	4426930	3.36506	2.8127	0.00390121	0.00390121	5.75797	6.10627	0.0930464	5	3.47439	3.35455	3.67023	3.59391	4.04539	4.19172	3.78043	3.88581	3.78984	3.20501	4.1712	4.03446	4.01554	3.89052	4.18325	4.35248	2.34872	2.46622	3.10555	2.51541	1.7924	2.26146	2.35815	1.87256	2.00275	1.47633	1.45611	1.37552	1.47852	1.30974	1.13496	1.15546	1.2155	1.01484	1.13835	1.30158	0.993476	1.56828	1.58015
simsample127	-60.6	5595740	3.4333	2.45135	0.00401672	0.00401672	6.03248	5.90489	0.12707	5	3.18516	3.00837	3.38661	3.33708	3.67546	3.94165	3.44823	3.56956	3.51079	2.87549	3.82427	3.77368	3.69633	3.64363	3.85552	4.1112	2.26551	2.42513	3.03891	2.47595	1.72664	2.19112	2.31044	1.82773	1.95847	1.43641	1.42939	1.34258	1.44927	1.27277	1.09421	1.10611	1.16743	0.96896	1.0889	1.2559	0.940223	1.49087	1.5092
simsample128	-58.8	4443110	3.34779	2.74602	0.00394823	0.00394823	6.06258	5.98105	0.110173	5	3.28785	3.13931	3.48448	3.43428	3.82182	4.02293	3.56859	3.67605	3.5999	2.99898	3.92743	3.84463	3.79339	3.71141	3.94983	4.16244	2.29296	2.43179	3.04102	2.47662	1.75234	2.21017	2.31917	1.84825	1.97667	1.45822	1.44378	1.36008	1.46421	1.29329	1.11946	1.13571	1.19628	0.998167	1.11931	1.28614	0.976398	1.53843	1.55594
simsample129	-57.2	5250630	3.41166	2.71281	0.00398115	0.00398115	6.15344	5.76309	0.117133	5	3.25134	3.08974	3.449	3.3979	3.76007	3.99279	3.52421	3.63887	3.57115	2.95666	3.88966	3.82398	3.76137	3.69342	3.91877	4.15138	2.2929	2.43854	3.04922	2.48562	1.74915	2.20954	2.32131	1.84343	1.97167	1.45238	1.44098	1.35576	1.46027	1.28684	1.11009	1.12404	1.18452	0.986273	1.10632	1.27138	0.959664	1.51293	1.5302
simsample130	-51.5	4418260	3.34608	2.72086	0.00388719	0.00388719	5.95625	5.97655	0.0903303	5	3.50404	3.39007	3.70096	3.62026	4.08787	4.2214	3.81526	3.91954	3.81904	3.23486	4.21432	4.06403	4.0512	3.91665	4.22167	4.38178	2.3492	2.46509	3.11164	2.51581	1.79327	2.26543	2.36148	1.87403	2.00584	1.47671	1.45567	1.37577	1.47935	1.31084	1.13644	1.15808	1.21845	1.0171	1.14167	1.30596	0.99728	1.57835	1.58957
simsample131	-62.65	5483850	3.4216	2.52324	0.00404472	0.00404472	6.07369	5.7435	0.127305	5	3.12871	2.95425	3.32628	3.28209	3.61212	3.87359	3.38701	3.50468	3.44736	2.82487	3.74797	3.70311	3.62566	3.57665	3.77986	4.03242	2.23364	2.39093	2.98954	2.43903	1.70364	2.15845	2.27625	1.80454	1.93247	1.41968	1.41249	1.32671	1.43157	1.25793	1.0825	1.0941	1.15449	0.95914	1.07713	1.24214	0.931484	1.47358	1.49248
simsample132	-47.5	4353720	3.3453	2.82146	0.00386701	0.00386701	5.68913	5.97957	0.0881418	5	3.52168	3.41137	3.71731	3.63675	4.10903	4.23514	3.83552	3.93818	3.83579	3.25759	4.23053	4.07802	4.06852	3.93101	4.23818	4.3933	2.3602	2.47267	3.1179	2.52235	1.80231	2.27341	2.36759	1.88108	2.01205	1.4835	1.46138	1.38167	1.48466	1.31669	1.14243	1.16445	1.22456	1.0231	1.14761	1.31124	1.00342	1.58454	1.59549
simsample133	-50.15	4484050	3.35157	2.79837	0.00391082	0.00391082	5.78172	5.86598	0.0950784	5	3.42892	3.30644	3.62387	3.55277	3.99461	4.14528	3.73021	3.83438	3.74118	3.15809	4.1126	3.98349	3.96051	3.8417	4.1253	4.29856	2.32668	2.44661	3.07749	2.49463	1.77667	2.24122	2.33934	1.85972	1.9891	1.46666	1.44714	1.36663	1.46933	1.30133	1.12801	1.14802	1.20789	1.00864	1.13132	1.29473	0.988065	1.55933	1.57214
simsample134	-51.3	4256260	3.31401	2.78621	0.00388519	0.00388519	6.05954	5.82324	0.0922858	5	3.468	3.35073	3.66419	3.59386	4.0516	4.18816	3.77548	3.87677	3.77899	3.19733	4.15759	4.01933	4.00108	3.87504	4.16664	4.33215	2.34183	2.46087	3.09607	2.50866	1.79069	2.25795	2.35636	1.87673	2.00758	1.48096	1.46001	1.37949	1.48312	1.31478	1.14157	1.16282	1.2233	1.02239	1.14666	1.31276	1.00425	1.58506	1.59815
simsample135	-53.85	5685280	3.4368	2.49098	0.00396723	0.00396723	5.89877	5.64836	0.104851	5	3.36347	3.22367	3.56185	3.48134	3.89383	4.08754	3.652	3.76859	3.68605	3.07794	4.06233	3.94513	3.90851	3.80332	4.07938	4.27741	2.2931	2.42349	3.0642	2.47781	1.74375	2.21403	2.31635	1.82473	1.95563	1.43239	1.418	1.33668	1.44023	1.26972	1.09371	1.1109	1.17067	0.972619	1.09373	1.25434	0.946078	1.50501	1.51655
simsample136	-62.1	5386290	3.41229	2.4371	0.00403049	0.00403049	5.97661	5.85279	0.129097	5	3.12968	2.9523	3.32937	3.2857	3.61545	3.88201	3.38766	3.50639	3.44974	2.8202	3.75245	3.7082	3.62805	3.58055	3.78338	4.04018	2.23419	2.39541	2.99757	2.44436	1.70406	2.1618	2.28214	1.80832	1.93782	1.42186	1.41542	1.32908	1.43513	1.26025	1.08412	1.09567	1.1567	0.960416	1.07925	1.24628	0.933214	1.47939	1.49891
simsample137	-50.3	4789680	3.39148	2.84219	0.00390465	0.00390465	5.9917	5.93289	0.0974078	5	3.4473	3.31836	3.64361	3.57051	4.00364	4.16963	3.74748	3.85603	3.76578	3.17364	4.13546	4.01346	3.98606	3.87225	4.15253	4.33545	2.35137	2.47317	3.10928	2.522	1.79316	2.26198	2.36077	1.87362	2.00315	1.47692	1.45827	1.37649	1.47964	1.30944	1.13324	1.15229	1.21233	1.01163	1.13447	1.29732	0.988031	1.5579	1.57041
simsample138	-48.6	4536310	3.38806	2.80995	0.00384663	0.00384663	5.84533	6.17401	0.0796352	5	3.62971	3.53545	3.82487	3.72301	4.22996	4.33007	3.95701	4.06164	3.94855	3.37728	4.38107	4.19472	4.20453	4.0409	4.38334	4.5144	2.38908	2.48918	3.15593	2.543	1.81992	2.29925	2.38564	1.88618	2.01813	1.48507	1.46055	1.38267	1.48477	1.31772	1.14205	1.16594	1.22549	1.023	1.14833	1.30807	1.00145	1.58571	1.59249
simsample139	-52.55	4159940	3.29974	2.78338	0.00392178	0.00392178	5.94886	5.66699	0.0896083	5	3.40621	3.297	3.59749	3.52696	3.98476	4.1067	3.71024	3.80741	3.70861	3.14486	4.08497	3.94162	3.9288	3.79921	4.09126	4.24505	2.289	2.40264	3.02517	2.44953	1.75114	2.20789	2.30269	1.83472	1.96282	1.44804	1.42657	1.34853	1.44963	1.2859	1.11736	1.13892	1.19795	1.00158	1.12333	1.2857	0.984953	1.55504	1.56734
simsample140	-53.55	4749530	3.34687	2.80342	0.00403799	0.00403799	5.72045	5.46124	0.117904	5	3.14572	2.98797	3.33791	3.30121	3.65147	3.87257	3.41022	3.51609	3.4503	2.85685	3.74426	3.68893	3.62474	3.56408	3.7722	3.99956	2.23199	2.37661	2.95835	2.41773	1.70715	2.15012	2.26181	1.80707	1.93138	1.42713	1.41528	1.33156	1.4338	1.26519	1.09484	1.10869	1.16815	0.974933	1.09242	1.25709	0.952869	1.49686	1.5166
simsample141	-49.85	4286100	3.32205	2.80622	0.00389055	0.00389055	5.74932	5.84165	0.0928256	5	3.45795	3.33963	3.65361	3.58363	4.03729	4.17673	3.76394	3.86561	3.76893	3.18782	4.14469	4.00916	3.98982	3.86573	4.15481	4.32196	2.33871	2.45769	3.09095	2.50524	1.7879	2.25402	2.35222	1.87317	2.00347	1.4782	1.45749	1.37698	1.48029	1.31213	1.13899	1.15994	1.22023	1.01978	1.14361	1.30901	1.00112	1.5794	1.59249
simsample142	-47.75	4650930	3.36035	2.75876	0.00388828	0.00388828	5.82189	5.89842	0.0988971	5	3.46232	3.3304	3.66178	3.5924	4.02908	4.19723	3.76415	3.87232	3.78176	3.18105	4.15216	4.03103	4.00058	3.88816	4.16756	4.3546	2.36272	2.48966	3.1297	2.53861	1.80364	2.27657	2.3791	1.89047	2.02234	1.49036	1.47196	1.38918	1.49425	1.32213	1.145	1.16438	1.22556	1.02273	1.14737	1.31433	1.00087	1.58025	1.5941
simsample143	-54.7	4840480	3.35647	2.81909	0.00403627	0.00403627	5.93722	5.48445	0.118919	5	3.16	2.99934	3.35336	3.31688	3.66511	3.89218	3.42502	3.53239	3.46749	2.86894	3.76069	3.70832	3.64194	3.58336	3.79008	4.02188	2.24745	2.39383	2.9786	2.43525	1.71869	2.16445	2.27719	1.81897	1.94385	1.43652	1.42498	1.34045	1.44333	1.2733	1.10144	1.11501	1.17481	0.980351	1.09838	1.2638	0.957425	1.50338	1.52329
simsample144	-60.6	5473480	3.41802	2.50756	0.00404407	0.00404407	6.00618	5.75968	0.12973	5	3.1174	2.93898	3.31589	3.27482	3.59872	3.86772	3.3738	3.49208	3.43688	2.81005	3.73232	3.69358	3.61189	3.56784	3.76532	4.02408	2.23491	2.39592	2.99324	2.44378	1.7051	2.16048	2.28055	1.80883	1.93721	1.42319	1.41678	1.33023	1.43577	1.26108	1.08504	1.09617	1.15692	0.961047	1.07929	1.24562	0.933322	1.47639	1.49614
simsample145	-51.8	4561930	3.34344	2.74627	0.00394841	0.00394841	5.7627	5.85764	0.116794	5	3.25356	3.09304	3.45221	3.41155	3.77875	4.00242	3.52791	3.63713	3.56764	2.95545	3.87748	3.81453	3.7508	3.68426	3.90438	4.13533	2.29873	2.44696	3.05047	2.49032	1.75779	2.21594	2.33063	1.86043	1.98929	1.46851	1.45608	1.37019	1.47576	1.30215	1.1267	1.14142	1.20279	1.00351	1.12497	1.29481	0.981171	1.54385	1.56373
simsample146	-51.7	4319750	3.31418	2.73079	0.00390276	0.00390276	5.96898	6.00456	0.117907	5	3.30127	3.13646	3.50419	3.46806	3.84032	4.06795	3.57941	3.68884	3.61863	2.99457	3.92871	3.86829	3.801	3.73617	3.95559	4.19281	2.3376	2.49129	3.10178	2.53394	1.78917	2.25443	2.37338	1.89825	2.02976	1.49913	1.48651	1.3986	1.50667	1.32963	1.15161	1.1666	1.22948	1.02634	1.15042	1.32558	1.00529	1.58123	1.60279
simsample147	-52.3	4268890	3.31682	2.60605	0.00393428	0.00393428	5.69836	6.0122	0.102957	5	3.37954	3.24352	3.57895	3.51779	3.94234	4.11589	3.67328	3.77921	3.69257	3.09159	4.05185	3.93926	3.90208	3.79826	4.06539	4.25831	2.31298	2.44644	3.07476	2.49438	1.76778	2.23442	2.34103	1.86274	1.99464	1.4681	1.45128	1.36882	1.47417	1.30329	1.12921	1.14807	1.20936	1.00888	1.13268	1.30154	0.989714	1.56659	1.58232
simsample148	-59	4764560	3.35591	2.76909	0.00406406	0.00406406	5.82136	5.5187	0.120526	5	3.09894	2.93854	3.28988	3.25469	3.59396	3.82213	3.35819	3.4646	3.40201	2.80982	3.68946	3.64028	3.57263	3.51737	3.71851	3.95005	2.20686	2.35323	2.9288	2.39437	1.68751	2.12667	2.23894	1.78771	1.91105	1.41134	1.40063	1.3172	1.41883	1.25106	1.08177	1.09484	1.15388	0.962469	1.07868	1.24204	0.939841	1.4772	1.49711
simsample149	-50.8	4311480	3.30418	2.75121	0.00388694	0.00388694	6.05101	5.70721	0.0957929	5	3.44483	3.32098	3.64243	3.57747	4.02481	4.17286	3.74841	3.85044	3.75619	3.1678	4.12598	3.99779	3.97265	3.85478	4.13674	4.31196	2.3395	2.46391	3.09607	2.51101	1.78957	2.25683	2.35858	1.88003	2.01136	1.48366	1.46379	1.38228	1.48677	1.31721	1.14355	1.1641	1.22505	1.0237	1.14819	1.31622	1.00577	1.58752	1.60195
simsample150	-54.9	4946250	3.41758	2.77794	0.00394618	0.00394618	5.9577	5.90583	0.0909434	5	3.44434	3.32985	3.63638	3.54876	3.99844	4.14135	3.74717	3.85488	3.75878	3.18362	4.15	4.00453	3.99183	3.86093	4.16183	4.32289	2.31297	2.42346	3.0621	2.47475	1.76055	2.22516	2.31633	1.83073	1.95847	1.4407	1.4208	1.34244	1.44274	1.27721	1.10432	1.12443	1.18274	0.985984	1.10672	1.26326	0.961948	1.5218	1.53087
simsample151	-49.05	4419350	3.32795	2.74546	0.00390276	0.00390276	5.87629	5.8536	0.0994953	5	3.43592	3.30412	3.63498	3.57135	4.00614	4.17131	3.73595	3.84135	3.75125	3.15351	4.11491	3.99698	3.96494	3.85513	4.12923	4.31621	2.34815	2.47686	3.11008	2.5243	1.79475	2.26421	2.36821	1.88586	2.01752	1.48769	1.46924	1.38654	1.4917	1.32028	1.14474	1.16424	1.22552	1.02337	1.14792	1.31635	1.00355	1.5839	1.59888
simsample152	-54.95	4448480	3.35467	2.83206	0.00399698	0.00399698	5.70643	5.94209	0.11094	5	3.25181	3.10275	3.44591	3.39889	3.77689	3.98011	3.52869	3.63508	3.56118	2.96677	3.87849	3.80256	3.74968	3.6723	3.90304	4.11686	2.27822	2.41593	3.01581	2.45921	1.74141	2.19356	2.30159	1.83608	1.9624	1.4496	1.43532	1.35195	1.45482	1.28525	1.11268	1.12835	1.18822	0.991928	1.1116	1.27656	0.969731	1.5245	1.5422
simsample153	-58.45	5229540	3.41681	2.6748	0.00398115	0.00398115	6.12362	5.80147	0.11074	5	3.29368	3.14344	3.49024	3.42827	3.81217	4.02358	3.57327	3.687	3.61241	3.00618	3.95192	3.86482	3.81463	3.73045	3.97609	4.19103	2.29008	2.42706	3.04634	2.47606	1.7453	2.20712	2.31368	1.83315	1.96155	1.44298	1.42972	1.34653	1.44997	1.27876	1.1032	1.11871	1.17859	0.98109	1.10117	1.2637	0.955002	1.50913	1.52401
simsample154	-55.8	4434120	3.35315	2.82183	0.00398969	0.00398969	5.69216	5.86881	0.105058	5	3.2741	3.13625	3.46607	3.41119	3.80704	3.98901	3.55611	3.66035	3.58053	2.99757	3.91287	3.81917	3.77753	3.68648	3.93297	4.12975	2.26696	2.39646	2.99977	2.44081	1.73214	2.18296	2.28603	1.82142	1.94721	1.43747	1.42145	1.34017	1.44166	1.27484	1.1042	1.12124	1.18035	0.985493	1.10472	1.26704	0.964189	1.51786	1.5336
simsample155	-53.35	4419150	3.34534	2.75369	0.00398563	0.00398563	5.56394	5.91289	0.107859	5	3.27582	3.13259	3.4703	3.41795	3.80982	4.00114	3.55681	3.66251	3.58456	2.99225	3.91496	3.82628	3.77964	3.69312	3.93561	4.14027	2.2751	2.40983	3.01594	2.45456	1.73865	2.19282	2.29922	1.83203	1.95935	1.44542	1.43032	1.34792	1.45084	1.28207	1.11012	1.1268	1.18669	0.990358	1.11058	1.27542	0.969169	1.52735	1.54407
simsample156	-60.9	5496250	3.40885	2.48731	0.00404269	0.00404269	5.99566	5.74171	0.137084	5	3.07876	2.88861	3.27936	3.24843	3.55236	3.8439	3.32899	3.44874	3.4002	2.76212	3.6779	3.65887	3.56436	3.53592	3.71478	3.99206	2.23799	2.40985	3.00129	2.45655	1.70911	2.16506	2.29174	1.82105	1.95028	1.43353	1.42947	1.34056	1.4479	1.27022	1.09252	1.10208	1.16382	0.966611	1.08534	1.25532	0.938552	1.48321	1.50561
simsample157	-51.7	4321640	3.3117	2.75817	0.00388694	0.00388694	6.08725	5.68744	0.0910634	5	3.45679	3.34282	3.65185	3.57958	4.04029	4.17105	3.7642	3.86463	3.76577	3.18876	4.1476	4.00477	3.98935	3.86019	4.15501	4.31557	2.32644	2.44352	3.07741	2.49168	1.7788	2.24404	2.34113	1.86364	1.99406	1.47024	1.4491	1.36947	1.47246	1.30546	1.13351	1.15502	1.21511	1.01541	1.13911	1.30405	0.997684	1.57613	1.58868
simsample158	-57.1	4727770	3.33968	2.76891	0.00406406	0.00406406	5.79067	5.55358	0.132086	5	3.05364	2.87367	3.24864	3.23009	3.53824	3.8029	3.30373	3.41272	3.36048	2.74841	3.61953	3.60245	3.51419	3.48389	3.65555	3.91745	2.22495	2.38837	2.95556	2.42681	1.70371	2.14483	2.26763	1.81688	1.94154	1.43581	1.42844	1.34084	1.44548	1.27242	1.09991	1.11048	1.17121	0.976977	1.09431	1.26403	0.953799	1.49537	1.51971
simsample159	-57.25	4716490	3.3457	2.77628	0.00406406	0.00406406	5.79707	5.56357	0.12412	5	3.11	2.94209	3.30383	3.27451	3.60684	3.84784	3.36851	3.47619	3.4163	2.8132	3.69614	3.65719	3.58231	3.53476	3.7276	3.97062	2.23137	2.38443	2.96136	2.42471	1.70732	2.15042	2.2671	1.81298	1.93773	1.43198	1.42214	1.33665	1.44011	1.2693	1.09771	1.11016	1.17025	0.976328	1.09392	1.26094	0.953641	1.4973	1.51896
simsample160	-52.8	5675040	3.42494	2.51223	0.003975	0.003975	5.91291	5.66456	0.11879	5	3.27332	3.10836	3.47489	3.41678	3.78354	4.02439	3.54754	3.66679	3.59904	2.97036	3.93276	3.86052	3.79667	3.72605	3.95971	4.19672	2.29658	2.44651	3.0716	2.49768	1.74975	2.21851	2.33263	1.84515	1.97653	1.45052	1.4404	1.35477	1.46105	1.2855	1.10675	1.12073	1.182	0.982086	1.10343	1.2699	0.954519	1.5131	1.52963
simsample161	-50.9	4600810	3.37444	2.77046	0.0039048	0.0039048	5.83913	5.96421	0.0955033	5	3.42622	3.30286	3.62107	3.54623	3.98569	4.1405	3.72642	3.83268	3.74027	3.15549	4.11499	3.98506	3.96208	3.84305	4.12835	4.30273	2.32297	2.44241	3.07575	2.4916	1.77199	2.23733	2.3347	1.85243	1.98167	1.45975	1.44074	1.36042	1.46283	1.29486	1.12112	1.14081	1.20043	1.00162	1.12384	1.28576	0.979652	1.54767	1.55974
simsample162	-52.7	4886570	3.37083	2.85869	0.00403555	0.00403555	5.82401	5.54951	0.118246	5	3.16819	3.0081	3.36107	3.32282	3.67133	3.89841	3.43392	3.54194	3.47686	2.8792	3.77113	3.71807	3.65271	3.59322	3.80132	4.03235	2.25297	2.39779	2.98374	2.43951	1.72234	2.16846	2.28006	1.8203	1.9448	1.43757	1.42585	1.3414	1.44393	1.27395	1.10167	1.11519	1.17477	0.980288	1.0981	1.26248	0.956476	1.50094	1.5203
simsample163	-46.95	4525720	3.37737	2.79742	0.00384663	0.00384663	5.80722	6.06094	0.0756911	5	3.66525	3.57957	3.85998	3.75307	4.27757	4.36074	3.99886	4.10161	3.98309	3.41787	4.42875	4.22769	4.24601	4.07109	4.42694	4.54538	2.39369	2.48945	3.16156	2.54418	1.82394	2.30488	2.3889	1.88838	2.02095	1.48676	1.46088	1.38392	1.48589	1.31972	1.14458	1.16967	1.22918	1.02637	1.15232	1.31188	1.00594	1.59425	1.60001
simsample164	-61.55	5373590	3.41789	2.45784	0.00402321	0.00402321	5.90583	5.95665	0.128506	5	3.16059	2.98243	3.36158	3.31668	3.64991	3.91768	3.42123	3.54106	3.48364	2.84992	3.78952	3.74415	3.66424	3.6155	3.82103	4.07893	2.25551	2.41696	3.02453	2.46638	1.72013	2.18167	2.30227	1.82401	1.95432	1.43427	1.42756	1.3406	1.44729	1.27109	1.0934	1.10507	1.16647	0.968585	1.08829	1.25612	0.94081	1.49079	1.51016
simsample165	-58.15	5386690	3.4337	2.68391	0.00402807	0.00402807	6.03051	5.89006	0.121215	5	3.21433	3.04627	3.41197	3.36247	3.70972	3.95768	3.48178	3.59907	3.53619	2.9169	3.84711	3.79166	3.72258	3.66314	3.87928	4.12202	2.28187	2.4317	3.03953	2.4795	1.73998	2.19958	2.31324	1.83487	1.96271	1.44481	1.4351	1.34927	1.45382	1.27964	1.10229	1.115	1.17534	0.977679	1.09683	1.26113	0.949248	1.49693	1.5144
simsample166	-53.35	4434190	3.34416	2.78805	0.00399236	0.00399236	5.56912	5.90839	0.114937	5	3.22098	3.06558	3.41618	3.37477	3.74146	3.95626	3.49343	3.60036	3.5302	2.93003	3.83806	3.77243	3.71254	3.64367	3.86413	4.08755	2.27105	2.41454	3.01014	2.4571	1.73669	2.18812	2.29968	1.83613	1.96281	1.44971	1.43673	1.3524	1.45608	1.28544	1.11266	1.12753	1.18784	0.991405	1.11113	1.27794	0.969477	1.52435	1.54351
simsample167	-53.1	4316420	3.33864	2.78096	0.00393468	0.00393468	5.6816	5.9586	0.103946	5	3.3158	3.17892	3.51014	3.45397	3.86017	4.03817	3.60245	3.70679	3.62436	3.03619	3.96453	3.86496	3.82509	3.72969	3.98276	4.17782	2.28816	2.41852	3.02976	2.4636	1.74886	2.20493	2.30903	1.84002	1.96772	1.452	1.43543	1.35362	1.4564	1.28811	1.1162	1.13392	1.19379	0.996771	1.11766	1.28235	0.976295	1.53845	1.55431
simsample168	-50.95	5001430	3.40508	2.87352	0.00399423	0.00399423	5.65584	5.67507	0.101864	5	3.31909	3.18523	3.51031	3.44451	3.84803	4.0268	3.60519	3.71267	3.6304	3.04876	3.97628	3.87277	3.83755	3.73838	3.99725	4.18804	2.28567	2.40894	3.02217	2.45558	1.74291	2.19755	2.2962	1.82311	1.94844	1.43736	1.42067	1.33999	1.44052	1.2738	1.10156	1.11877	1.17723	0.982099	1.10097	1.2596	0.957746	1.50797	1.52117
simsample169	-52.55	4877700	3.36786	2.8631	0.00403555	0.00403555	5.77175	5.59752	0.123906	5	3.1427	2.97275	3.33734	3.30694	3.63906	3.88489	3.40358	3.51312	3.45345	2.84621	3.73338	3.69658	3.62093	3.57407	3.76729	4.01356	2.2602	2.4131	2.99476	2.4537	1.7289	2.17571	2.29219	1.8326	1.95757	1.44793	1.43791	1.35152	1.45535	1.28291	1.10908	1.1213	1.1816	0.985922	1.10409	1.27113	0.961539	1.50699	1.52835
simsample170	-48.55	4340500	3.29322	2.65259	0.00392912	0.00392912	5.68267	5.6174	0.102275	5	3.36374	3.22971	3.56179	3.50503	3.92927	4.09691	3.65677	3.75978	3.67283	3.07813	4.02592	3.91518	3.87851	3.77553	4.03913	4.22938	2.30497	2.43761	3.059	2.48371	1.76352	2.22618	2.33262	1.86017	1.9911	1.4674	1.44998	1.36778	1.47264	1.30283	1.13026	1.14929	1.21036	1.01068	1.13409	1.30327	0.992981	1.56917	1.58552
simsample171	-49.95	4422870	3.35774	2.6851	0.00387986	0.00387986	5.71034	6.13978	0.0878756	5	3.55082	3.44104	3.74885	3.66073	4.14166	4.26812	3.86748	3.97308	3.86883	3.28291	4.27907	4.11676	4.10967	3.96617	4.28418	4.43773	2.36517	2.47833	3.13538	2.53103	1.80405	2.28132	2.37571	1.8818	2.01486	1.48172	1.46002	1.3804	1.48434	1.31533	1.13978	1.16215	1.22269	1.02013	1.1456	1.30962	0.999782	1.58492	1.59487
simsample172	-49.2	5102120	3.40944	2.60436	0.0038615	0.0038615	6.11419	6.0053	0.0938681	5	3.55734	3.43381	3.75938	3.66804	4.13203	4.28906	3.86934	3.98323	3.88526	3.27797	4.29526	4.14478	4.12734	3.99409	4.30569	4.47908	2.38634	2.5068	3.17393	2.56205	1.81606	2.30129	2.3993	1.89326	2.02792	1.48804	1.46887	1.38723	1.49271	1.31981	1.14006	1.1607	1.2219	1.01728	1.14324	1.30769	0.992798	1.57693	1.58685
simsample173	-50.65	4305160	3.30689	2.75812	0.00388694	0.00388694	6.09817	5.67806	0.0916925	5	3.45759	3.34225	3.65318	3.58243	4.04194	4.17464	3.76479	3.86523	3.76685	3.18799	4.14686	4.00608	3.98925	3.86162	4.15462	4.31722	2.33012	2.44845	3.08224	2.49635	1.782	2.24776	2.34572	1.86814	1.99882	1.47399	1.45295	1.37297	1.4763	1.30881	1.13658	1.15801	1.2183	1.01817	1.14213	1.30786	1.00062	1.58043	1.59335
simsample174	-49.3	5044380	3.38203	2.62577	0.00388208	0.00388208	6.13153	5.79645	0.10229	5	3.46215	3.32347	3.66455	3.5918	4.02261	4.20598	3.76184	3.87471	3.78691	3.17278	4.16228	4.04358	4.00817	3.89931	4.17843	4.375	2.36458	2.49667	3.14481	2.54824	1.80282	2.28122	2.38641	1.89067	2.02438	1.48811	1.47145	1.38785	1.49419	1.32	1.14089	1.15957	1.2213	1.01741	1.14261	1.31035	0.993859	1.57439	1.5881
simsample175	-51.45	4789840	3.34809	2.75808	0.00401374	0.00401374	5.76314	5.48546	0.11542	5	3.19312	3.03823	3.38708	3.34518	3.70823	3.92323	3.46299	3.56976	3.50052	2.9035	3.8071	3.74188	3.68195	3.61389	3.83288	4.05555	2.25079	2.3938	2.98583	2.43655	1.7208	2.16929	2.28024	1.81946	1.94541	1.43608	1.4235	1.33983	1.44282	1.27336	1.10179	1.11646	1.17633	0.981456	1.10023	1.26568	0.959454	1.50974	1.52864
simsample176	-51.75	4418660	3.36483	2.80702	0.00390121	0.00390121	5.78973	6.10176	0.0950127	5	3.44071	3.31776	3.63596	3.5628	4.00493	4.15755	3.74265	3.84805	3.75482	3.16998	4.12853	3.99875	3.97604	3.8566	4.1419	4.31582	2.33436	2.45383	3.08755	2.50238	1.78162	2.24777	2.34548	1.8631	1.99259	1.46896	1.44949	1.36882	1.47156	1.30312	1.12901	1.14893	1.2088	1.00914	1.13191	1.29487	0.987694	1.55878	1.57121
simsample177	-53.3	4429120	3.34079	2.7681	0.00400681	0.00400681	5.58853	5.88737	0.115509	5	3.21128	3.05534	3.40646	3.36576	3.73081	3.94658	3.48271	3.58953	3.51989	2.91959	3.82662	3.76198	3.70129	3.63344	3.85255	4.07677	2.26519	2.40944	3.00381	2.45193	1.73231	2.18308	2.29507	1.83252	1.9592	1.44675	1.434	1.3497	1.4534	1.28288	1.11041	1.12519	1.18551	0.989364	1.10896	1.2759	0.967643	1.52199	1.54134
simsample178	-61.9	5515690	3.43735	2.46895	0.00403141	0.00403141	5.95148	5.94428	0.120847	5	3.21976	3.05349	3.41942	3.36149	3.71785	3.96375	3.48838	3.60811	3.54333	2.9181	3.87218	3.8042	3.73813	3.67166	3.89982	4.13903	2.2636	2.41416	3.03262	2.46571	1.72391	2.18785	2.30172	1.81849	1.94855	1.42865	1.4196	1.33472	1.43996	1.26593	1.08883	1.10209	1.16264	0.965234	1.08486	1.24908	0.937021	1.48691	1.50317
simsample179	-57	5315430	3.43152	2.67444	0.00395988	0.00395988	6.10787	5.76511	0.0969078	5	3.41094	3.28515	3.60548	3.52085	3.95313	4.11898	3.70733	3.81915	3.72921	3.14008	4.11288	3.98076	3.95756	3.83833	4.1278	4.30536	2.30735	2.42591	3.06509	2.47829	1.75524	2.22212	2.31772	1.82919	1.95796	1.43803	1.42045	1.34074	1.44226	1.27457	1.10015	1.11888	1.17771	0.980416	1.10116	1.25904	0.954889	1.51336	1.52339
simsample180	-59.35	4442900	3.36779	2.79564	0.0039934	0.0039934	5.81697	6.06077	0.108428	5	3.25573	3.11173	3.4486	3.39537	3.78034	3.97558	3.53412	3.64068	3.56449	2.97501	3.8912	3.80592	3.75851	3.67437	3.91373	4.11974	2.26613	2.3996	3.0023	2.44431	1.73078	2.18239	2.28753	1.82128	1.94725	1.4368	1.42208	1.33999	1.44195	1.27393	1.10229	1.11843	1.17773	0.982646	1.1017	1.2643	0.960091	1.51183	1.52805
simsample181	-44.15	4643010	3.37402	2.78227	0.00385597	0.00385597	5.68175	5.9248	0.0799339	5	3.63622	3.54144	3.83246	3.73217	4.24158	4.34106	3.96463	4.06877	3.95522	3.38142	4.38822	4.20153	4.21065	4.04699	4.38954	4.52128	2.39314	2.49492	3.16309	2.54884	1.82407	2.30483	2.3925	1.89283	2.02568	1.49052	1.46597	1.38779	1.4906	1.32294	1.14703	1.17115	1.23113	1.02782	1.15386	1.31519	1.0071	1.59532	1.60256
simsample182	-50.85	4426160	3.3597	2.69123	0.00387203	0.00387203	5.71476	6.12117	0.089246	5	3.51645	3.40459	3.71336	3.62782	4.09999	4.23105	3.82911	3.9345	3.83267	3.24861	4.23561	4.07934	4.06943	3.93066	4.24199	4.39873	2.34895	2.463	3.11387	2.51498	1.7917	2.26536	2.36007	1.86984	2.00187	1.47242	1.4513	1.37185	1.47521	1.30695	1.13233	1.15417	1.21437	1.01315	1.13767	1.30085	0.992661	1.57301	1.58332
simsample183	-61.9	5416340	3.41723	2.57271	0.0040481	0.0040481	6.05386	5.7055	0.125477	5	3.13498	2.96351	3.33152	3.28726	3.62088	3.87588	3.39455	3.51077	3.45196	2.83433	3.75271	3.70538	3.63066	3.5791	3.7842	4.03222	2.23478	2.38926	2.98611	2.43654	1.70482	2.15803	2.27425	1.80435	1.93157	1.42023	1.41223	1.32688	1.43116	1.25839	1.0836	1.09556	1.15568	0.960722	1.07852	1.24291	0.933521	1.47514	1.49384
simsample184	-52.65	4779840	3.37483	2.79674	0.00397457	0.00397457	5.87729	5.90244	0.11726	5	3.26425	3.10163	3.46281	3.41968	3.78296	4.01323	3.53864	3.65028	3.58203	2.96735	3.89178	3.83134	3.76662	3.70154	3.92119	4.15549	2.31138	2.4591	3.06547	2.5033	1.76612	2.2261	2.34002	1.86555	1.99408	1.47226	1.46015	1.37387	1.47926	1.30485	1.1279	1.14213	1.20333	1.00356	1.12477	1.29322	0.979045	1.53918	1.55836
simsample185	-61.45	5536420	3.42059	2.57403	0.00403065	0.00403065	6.19135	5.70642	0.130687	5	3.12328	2.94222	3.32203	3.28396	3.60359	3.87739	3.37952	3.49802	3.44409	2.81537	3.73351	3.70068	3.61636	3.57605	3.76871	4.03176	2.24961	2.41204	3.00804	2.45901	1.71697	2.17291	2.29391	1.82155	1.94973	1.43418	1.42785	1.34042	1.44627	1.27052	1.09344	1.10419	1.16516	0.968353	1.08684	1.25391	0.940098	1.48402	1.50435
simsample186	-48.95	4452080	3.33951	2.66671	0.00389468	0.00389468	5.62421	5.90975	0.0943199	5	3.46094	3.34	3.6586	3.58328	4.03707	4.18356	3.76627	3.87136	3.77534	3.18568	4.16025	4.02124	4.00083	3.87574	4.16932	4.33965	2.3337	2.45504	3.09616	2.50524	1.78183	2.25215	2.35139	1.86673	1.99859	1.47073	1.45115	1.37061	1.47467	1.30559	1.13143	1.15219	1.21278	1.01196	1.13615	1.30157	0.992233	1.57125	1.58373
simsample187	-51.6	4349410	3.32942	2.67767	0.00392768	0.00392768	5.6667	5.99165	0.105272	5	3.35959	3.21883	3.55839	3.50118	3.91366	4.09728	3.64977	3.75644	3.67323	3.07115	4.0214	3.91958	3.87743	3.78117	4.03853	4.2389	2.3156	2.45087	3.07387	2.49759	1.76975	2.23445	2.34195	1.8649	1.99575	1.47061	1.45445	1.37126	1.47639	1.305	1.13042	1.1484	1.20958	1.00929	1.13248	1.30098	0.989043	1.56214	1.57855
simsample188	-51.75	5229820	3.41875	2.66215	0.00391472	0.00391472	6.0782	5.91243	0.106843	5	3.38914	3.24298	3.58904	3.51943	3.92485	4.1271	3.67886	3.79416	3.7137	3.1004	4.07271	3.97076	3.92728	3.83136	4.0944	4.30272	2.3372	2.47169	3.10871	2.52269	1.78034	2.2525	2.35808	1.8662	1.99729	1.46837	1.45364	1.36992	1.47485	1.30141	1.12293	1.13971	1.20047	0.999278	1.1219	1.28635	0.973027	1.53936	1.55316
simsample189	-52.35	4292300	3.3119	2.76991	0.00389556	0.00389556	6.13569	5.77491	0.0954317	5	3.43733	3.31434	3.63397	3.56815	4.01423	4.16162	3.74024	3.84224	3.74813	3.1624	4.1174	3.98905	3.96468	3.84656	4.12847	4.30247	2.33394	2.457	3.08757	2.50406	1.78489	2.25067	2.35143	1.87376	2.00442	1.47869	1.45881	1.37764	1.48158	1.31266	1.13942	1.15988	1.22051	1.01989	1.14384	1.31072	1.00159	1.5805	1.59461
simsample190	-56.05	4478640	3.36108	2.76839	0.00392494	0.00392494	5.97415	6.08677	0.10793	5	3.33091	3.18487	3.52828	3.47331	3.86989	4.0667	3.61622	3.72474	3.64599	3.04368	3.98246	3.89268	3.8453	3.75754	4.00436	4.2131	2.31416	2.4504	3.06746	2.49633	1.76761	2.22957	2.33703	1.86059	1.9897	1.46764	1.45245	1.36873	1.47307	1.30149	1.1263	1.14305	1.20374	1.00432	1.12621	1.29274	0.981779	1.54704	1.56359
simsample191	-59.6	4298820	3.33112	2.81115	0.00398328	0.00398328	5.98129	5.94743	0.11818	5	3.18494	3.02478	3.37992	3.34551	3.70026	3.92337	3.45276	3.55892	3.49227	2.89113	3.78728	3.73286	3.66697	3.60664	3.81538	4.04626	2.26241	2.40994	2.99728	2.45067	1.73137	2.17955	2.29362	1.83475	1.96078	1.44958	1.43744	1.35237	1.45622	1.28525	1.11293	1.12702	1.18745	0.99148	1.11078	1.27875	0.970023	1.52299	1.54365
simsample192	-50.8	4364430	3.33127	2.76105	0.00391252	0.00391252	5.82133	5.82704	0.0909287	5	3.46612	3.35192	3.66122	3.58575	4.04643	4.17942	3.7739	3.87591	3.77705	3.19871	4.16214	4.01793	4.00318	3.87296	4.17019	4.33096	2.33106	2.44717	3.0841	2.49613	1.78089	2.24753	2.34376	1.86327	1.99368	1.46933	1.44835	1.36875	1.47159	1.30437	1.13172	1.1531	1.21308	1.01328	1.13687	1.3008	0.994392	1.57148	1.58343
simsample193	-48.2	4532340	3.35168	2.80254	0.00391082	0.00391082	5.77245	5.88647	0.098511	5	3.43707	3.30676	3.63462	3.56797	4.00163	4.1663	3.73702	3.84316	3.75301	3.15898	4.11748	3.99858	3.96846	3.85736	4.13301	4.31792	2.34813	2.47372	3.10657	2.52136	1.79342	2.26171	2.36344	1.88027	2.0108	1.48318	1.46456	1.3823	1.48648	1.3158	1.14025	1.15958	1.2203	1.01893	1.14266	1.30874	0.997747	1.5734	1.58749
simsample194	-56.35	5342160	3.43037	2.66491	0.00395988	0.00395988	6.10831	5.7687	0.0996965	5	3.39829	3.26701	3.59397	3.51313	3.93703	4.11303	3.69216	3.805	3.71792	3.12292	4.09467	3.97089	3.94216	3.82948	4.11146	4.29727	2.31058	2.43323	3.07106	2.48533	1.75814	2.22574	2.32381	1.83492	1.9641	1.4427	1.42598	1.34536	1.4476	1.27865	1.10341	1.12154	1.18077	0.982821	1.1038	1.26302	0.956995	1.51624	1.52717
simsample195	-57.65	4421760	3.34912	2.7469	0.00391872	0.00391872	6.16729	5.95824	0.0957597	5	3.42221	3.29884	3.61769	3.54632	3.98753	4.13988	3.72273	3.82733	3.73453	3.14941	4.10713	3.97781	3.954	3.83563	4.11923	4.2936	2.32077	2.44197	3.07362	2.49051	1.77201	2.23699	2.33584	1.85604	1.98586	1.4632	1.44406	1.36357	1.46653	1.29842	1.12519	1.14515	1.20514	1.00597	1.12872	1.29249	0.985555	1.55718	1.57007
simsample196	-51.5	4948380	3.39403	2.8507	0.0039877	0.0039877	5.83438	5.69077	0.106697	5	3.2914	3.14883	3.48436	3.42619	3.81584	4.01011	3.57297	3.6813	3.60369	3.01343	3.93678	3.84733	3.80285	3.71482	3.96032	4.16424	2.28669	2.41723	3.02627	2.46291	1.74496	2.1998	2.30295	1.83108	1.95705	1.44419	1.42893	1.34677	1.44852	1.27993	1.10679	1.12305	1.1822	0.986202	1.10547	1.26676	0.961971	1.51381	1.52888
simsample197	-50.35	4144130	3.31942	2.76686	0.00385577	0.00385577	6.05846	6.0708	0.0820228	5	3.60672	3.50852	3.80397	3.7154	4.22031	4.32052	3.9332	4.03363	3.92178	3.34655	4.34123	4.16393	4.16724	4.01088	4.34186	4.4789	2.3857	2.49319	3.15318	2.54497	1.82304	2.30125	2.39314	1.90094	2.03448	1.49888	1.47444	1.39549	1.49945	1.33129	1.15653	1.18075	1.24145	1.03757	1.16437	1.3298	1.01998	1.61404	1.62358
simsample198	-55.1	4456200	3.35635	2.76895	0.00392494	0.00392494	5.98279	6.07514	0.107567	5	3.33937	3.19377	3.5371	3.48223	3.8811	4.07644	3.6257	3.73397	3.65458	3.05181	3.99214	3.90125	3.85437	3.76569	4.01365	4.2217	2.31869	2.45493	3.07306	2.5008	1.77134	2.23407	2.34167	1.86477	1.99418	1.47107	1.45568	1.37186	1.47642	1.30462	1.12927	1.14619	1.20703	1.00719	1.12941	1.29645	0.984941	1.55198	1.5686
simsample199	-55	4421030	3.36253	2.75097	0.00387861	0.00387861	6.02987	6.11729	0.0936925	5	3.461	3.34063	3.65707	3.58027	4.03072	4.17825	3.76575	3.87143	3.77594	3.19	4.15855	4.02124	4.0017	3.87702	4.16974	4.33952	2.33725	2.45583	3.0951	2.5056	1.78343	2.25218	2.34942	1.86443	1.99491	1.46923	1.44946	1.3691	1.47219	1.30364	1.12933	1.14977	1.20982	1.00964	1.13301	1.29627	0.988507	1.56268	1.57455
simsample200	-54.6	4858800	3.35559	2.78952	0.00402269	0.00402269	5.88977	5.48133	0.11969	5	3.15671	2.99486	3.35056	3.31433	3.66132	3.89073	3.42115	3.52896	3.4646	2.86401	3.75774	3.70626	3.63874	3.58117	3.78709	4.02064	2.24606	2.39372	2.97907	2.4354	1.71756	2.1639	2.2774	1.81872	1.94395	1.43602	1.4248	1.34012	1.44328	1.27292	1.1009	1.11436	1.1743	0.979694	1.09785	1.2637	0.956767	1.50324	1.52332
simsample201	-48.25	4448380	3.33973	2.67462	0.00389468	0.00389468	5.60051	5.93058	0.0938732	5	3.47739	3.35681	3.67563	3.5996	4.05642	4.20191	3.78441	3.88971	3.79287	3.20189	4.18003	4.03942	4.01974	3.89325	4.18896	4.35874	2.34349	2.46465	3.10841	2.51503	1.78932	2.26139	2.36062	1.8741	2.00639	1.47661	1.45679	1.37603	1.4804	1.3108	1.13604	1.15697	1.21774	1.01617	1.14083	1.30672	0.996399	1.57765	1.59006
simsample202	-51	4903940	3.37611	2.81626	0.00401067	0.00401067	5.5859	5.59983	0.115456	5	3.19743	3.04165	3.39067	3.34658	3.70612	3.9252	3.46703	3.57545	3.50716	2.91022	3.81313	3.74972	3.68964	3.62246	3.84103	4.06524	2.25767	2.39931	2.99231	2.44256	1.7249	2.17375	2.28344	1.82015	1.94538	1.43649	1.42405	1.3403	1.44277	1.27315	1.10073	1.115	1.17453	0.979715	1.09797	1.26166	0.955888	1.50257	1.52075
simsample203	-56.65	4515220	3.35591	2.70793	0.00393409	0.00393409	5.90618	5.92102	0.0998403	5	3.37023	3.24018	3.56549	3.49819	3.92296	4.08939	3.66377	3.76968	3.68194	3.09337	4.04361	3.92607	3.89499	3.78639	4.05815	4.24247	2.2998	2.42537	3.05028	2.47353	1.75562	2.21749	2.31856	1.84181	1.97097	1.45153	1.43402	1.35316	1.45603	1.28787	1.1151	1.13393	1.19379	0.995895	1.11763	1.28113	0.974812	1.54078	1.55453
simsample204	-62.25	5487060	3.42195	2.50249	0.0040362	0.0040362	6.02796	5.78134	0.127956	5	3.1332	2.95734	3.33162	3.28741	3.6171	3.88127	3.39164	3.51002	3.45305	2.82742	3.75439	3.71017	3.63159	3.58331	3.78636	4.04102	2.23775	2.39645	2.99702	2.44495	1.70669	2.16309	2.28176	1.80846	1.93697	1.42252	1.41558	1.32947	1.4348	1.26048	1.08446	1.09599	1.15662	0.960708	1.07906	1.24474	0.932915	1.47656	1.4956
simsample205	-59.9	5407390	3.42402	2.61579	0.00401512	0.00401512	6.07969	5.72924	0.117	5	3.22114	3.06178	3.41748	3.36174	3.72329	3.95414	3.49154	3.60692	3.53937	2.92829	3.86352	3.79286	3.73237	3.66193	3.89088	4.1199	2.26181	2.40585	3.01598	2.45459	1.72389	2.18184	2.29209	1.81572	1.94347	1.42874	1.41787	1.33399	1.43756	1.26595	1.09086	1.10476	1.16457	0.968561	1.08737	1.24996	0.941604	1.48871	1.50486
simsample206	-50.95	4987230	3.40317	2.85465	0.00398526	0.00398526	5.81402	5.72726	0.102097	5	3.34222	3.20707	3.53511	3.46886	3.87539	4.05595	3.63031	3.73867	3.65587	3.0691	4.00471	3.90033	3.86454	3.76477	4.02557	4.21816	2.30115	2.42586	3.04398	2.47299	1.75474	2.213	2.31271	1.83604	1.96252	1.44741	1.4307	1.34941	1.45083	1.28279	1.10928	1.12663	1.1856	0.988973	1.10881	1.26886	0.964563	1.51931	1.53268
simsample207	-53.35	4795290	3.35541	2.84296	0.00403247	0.00403247	5.81858	5.57324	0.124942	5	3.12619	2.95534	3.32079	3.29296	3.62231	3.8691	3.38538	3.49412	3.43525	2.8283	3.71165	3.67737	3.60012	3.55545	3.74532	3.99298	2.25172	2.40615	2.98451	2.44608	1.72304	2.16828	2.28581	1.82889	1.95379	1.4452	1.43546	1.349	1.45294	1.28068	1.10748	1.11957	1.17996	0.984674	1.10274	1.27047	0.961044	1.50636	1.52836
simsample208	-50.25	4526500	3.36248	2.77935	0.00390849	0.00390849	5.75689	5.9281	0.091468	5	3.47153	3.35553	3.66653	3.58751	4.04424	4.18357	3.77846	3.88304	3.78535	3.20468	4.17199	4.02899	4.01366	3.88423	4.18201	4.34541	2.33682	2.45211	3.09174	2.50187	1.78311	2.25104	2.34632	1.86198	1.99201	1.46751	1.44696	1.36724	1.46974	1.30214	1.12843	1.14933	1.20908	1.00932	1.1325	1.29477	0.988433	1.56207	1.57331
simsample209	-54.25	4320790	3.32834	2.81664	0.00396448	0.00396448	5.86063	5.89588	0.112288	5	3.25718	3.10545	3.45303	3.4109	3.78852	3.99398	3.53427	3.63976	3.56629	2.96733	3.87963	3.80756	3.75157	3.67718	3.90404	4.12184	2.28799	2.42943	3.02884	2.47165	1.7505	2.2041	2.31493	1.8501	1.97744	1.4614	1.4472	1.36288	1.46691	1.29605	1.12298	1.13868	1.19928	1.00164	1.12236	1.29033	0.980786	1.54133	1.5604
simsample210	-53.3	4635220	3.3814	2.81951	0.00395106	0.00395106	5.78151	6	0.103399	5	3.35236	3.21447	3.54737	3.48478	3.89221	4.07548	3.64135	3.74936	3.66674	3.07399	4.0138	3.91196	3.8733	3.77569	4.03415	4.2307	2.31203	2.44054	3.06039	2.48734	1.76446	2.22533	2.32782	1.85039	1.97832	1.45918	1.44267	1.36047	1.46324	1.2937	1.11939	1.13686	1.19665	0.998432	1.11952	1.28256	0.975156	1.53645	1.55097
simsample211	-47.35	4451420	3.33357	2.77498	0.00388437	0.00388437	5.83566	5.83723	0.095286	5	3.47999	3.35555	3.67852	3.60861	4.05876	4.2101	3.7862	3.89091	3.79597	3.20323	4.17214	4.04122	4.01729	3.89698	4.18407	4.36006	2.36129	2.48446	3.12432	2.53286	1.80427	2.276	2.37676	1.89123	2.0231	1.49182	1.47192	1.39003	1.49477	1.32401	1.14832	1.16884	1.22991	1.02727	1.15227	1.31958	1.00748	1.59032	1.60389
simsample212	-50.9	4605190	3.37444	2.76721	0.0039048	0.0039048	5.84563	5.96421	0.0955033	5	3.42833	3.30491	3.62333	3.54834	3.98818	4.14306	3.72873	3.83508	3.74259	3.15737	4.11777	3.98759	3.96464	3.84545	4.13107	4.30552	2.32411	2.44364	3.0775	2.49291	1.77284	2.23851	2.33595	1.85333	1.98268	1.46041	1.4414	1.36105	1.46353	1.29546	1.12162	1.14133	1.20099	1.00206	1.12436	1.28638	0.980083	1.54849	1.56055
simsample213	-50.55	5572690	3.41965	2.47662	0.00393697	0.00393697	5.81045	5.61797	0.102521	5	3.40522	3.26902	3.6051	3.52267	3.94848	4.1331	3.69921	3.81482	3.72845	3.11909	4.11364	3.98774	3.9552	3.84326	4.12794	4.32026	2.3102	2.43946	3.08672	2.49416	1.75748	2.23156	2.33373	1.83936	1.97174	1.44413	1.42878	1.34742	1.45181	1.28068	1.10407	1.12222	1.18257	0.982898	1.10545	1.26786	0.957589	1.5243	1.53579
simsample214	-61.45	5424490	3.40738	2.56918	0.0040445	0.0040445	6.09558	5.67718	0.133132	5	3.08926	2.90561	3.28755	3.25459	3.56607	3.84434	3.34183	3.45924	3.40763	2.77963	3.68796	3.66228	3.57407	3.53944	3.72383	3.99105	2.2358	2.40114	2.99005	2.44681	1.70748	2.16015	2.28296	1.81531	1.94301	1.42987	1.42425	1.33654	1.44243	1.26687	1.09065	1.10092	1.16194	0.965908	1.08397	1.25184	0.938393	1.48056	1.50205
simsample215	-49.05	4891810	3.36698	2.81407	0.00401067	0.00401067	5.58738	5.5931	0.120887	5	3.17332	3.00799	3.36849	3.3327	3.67702	3.91358	3.43835	3.54789	3.48465	2.8782	3.77647	3.7288	3.65863	3.60369	3.80767	4.04657	2.26476	2.4145	3.00318	2.45647	1.7316	2.18114	2.29585	1.83316	1.95901	1.4475	1.43663	1.35096	1.45484	1.28281	1.10899	1.1221	1.18243	0.986348	1.10511	1.27183	0.962367	1.51103	1.53133
simsample216	-45.85	5041710	3.38161	2.60006	0.00385831	0.00385831	6.05323	5.82166	0.094178	5	3.57024	3.44587	3.77384	3.6869	4.15445	4.30974	3.88422	3.9965	3.89774	3.28749	4.30547	4.1562	4.13735	4.00489	4.31485	4.4895	2.39757	2.52061	3.18822	2.57509	1.82681	2.31373	2.41392	1.90858	2.04446	1.50116	1.48171	1.39939	1.50602	1.33207	1.15193	1.17298	1.23493	1.02881	1.15603	1.32346	1.00598	1.59724	1.6083
simsample217	-52.45	4369250	3.33595	2.71372	0.00388719	0.00388719	5.96376	5.99087	0.0996322	5	3.41734	3.28608	3.61553	3.55019	3.98281	4.14835	3.71558	3.82135	3.7318	3.13599	4.09636	3.97757	3.94596	3.83599	4.11034	4.2964	2.33271	2.46072	3.09248	2.50869	1.78216	2.24986	2.35313	1.87194	2.00311	1.47602	1.45793	1.37582	1.48041	1.3099	1.13515	1.15449	1.21541	1.01447	1.13828	1.30535	0.994313	1.57084	1.58539
simsample218	-49.05	4371510	3.34557	2.69329	0.00386893	0.00386893	5.64846	5.93778	0.0785792	5	3.58044	3.49117	3.77412	3.675	4.1863	4.27433	3.90615	4.00665	3.8922	3.32906	4.3251	4.13329	4.14548	3.97922	4.32224	4.4457	2.344	2.44446	3.10378	2.49832	1.78827	2.26182	2.34857	1.85874	1.99065	1.46343	1.43889	1.36256	1.46424	1.29981	1.12783	1.15238	1.21168	1.01158	1.13625	1.29641	0.993224	1.57663	1.58377
simsample219	-48.85	4989640	3.39522	2.6456	0.00384124	0.00384124	6.01319	5.78993	0.0811121	5	3.61612	3.51994	3.81286	3.70649	4.21313	4.31834	3.94154	4.04876	3.93643	3.3584	4.37762	4.1872	4.19608	4.03148	4.37783	4.5108	2.37104	2.47373	3.14568	2.53003	1.80445	2.28605	2.3736	1.87138	2.00465	1.47097	1.44763	1.37009	1.47272	1.30548	1.12986	1.15357	1.21328	1.01123	1.13657	1.29628	0.989348	1.57317	1.57948
simsample220	-60.8	5434950	3.42193	2.60341	0.00401512	0.00401512	6.07131	5.72185	0.123162	5	3.16662	2.99779	3.36341	3.31616	3.65729	3.90694	3.42968	3.54603	3.48493	2.86784	3.7917	3.73885	3.66762	3.61131	3.82267	4.06655	2.24972	2.40153	3.00303	2.44917	1.7158	2.17125	2.28597	1.8131	1.94057	1.42716	1.41833	1.3331	1.43734	1.26443	1.08901	1.10145	1.16158	0.96583	1.08411	1.24822	0.938401	1.48233	1.50035
simsample221	-51.8	4478390	3.33852	2.71068	0.00392607	0.00392607	5.87034	5.93664	0.11031	5	3.3277	3.17738	3.52727	3.47685	3.87064	4.07336	3.61202	3.72051	3.64312	3.03378	3.97584	3.891	3.83904	3.75564	3.9976	4.21263	2.31868	2.46008	3.07736	2.50557	1.7723	2.23618	2.34718	1.87077	2.00125	1.47581	1.46124	1.37651	1.48223	1.30912	1.13333	1.14992	1.21141	1.01073	1.13364	1.30326	0.989288	1.5599	1.57783
simsample222	-53.7	4783270	3.37833	2.79306	0.00397457	0.00397457	5.8977	5.91838	0.118405	5	3.24054	3.07675	3.4383	3.39633	3.75398	3.98733	3.51231	3.62398	3.55732	2.94393	3.86305	3.80602	3.73963	3.67737	3.89314	4.12932	2.29927	2.44766	3.05028	2.49165	1.75682	2.21452	2.32863	1.85635	1.98424	1.46493	1.4533	1.36717	1.47217	1.29826	1.12192	1.13577	1.19672	0.997893	1.11841	1.28616	0.973145	1.52979	1.5491
simsample223	-51	4395830	3.33325	2.76489	0.00391252	0.00391252	5.81635	5.82088	0.0975733	5	3.39806	3.27168	3.59345	3.52787	3.96181	4.11842	3.69574	3.79921	3.70855	3.12316	4.07157	3.95002	3.92214	3.80958	4.0848	4.26386	2.31505	2.43895	3.0645	2.48604	1.76908	2.23163	2.33229	1.85644	1.98589	1.46442	1.44565	1.3647	1.46784	1.2996	1.12689	1.14647	1.20659	1.00765	1.13024	1.29515	0.98801	1.55931	1.57334
simsample224	-60.05	5666090	3.43311	2.45127	0.00401672	0.00401672	6.0458	5.88831	0.131374	5	3.16444	2.98027	3.36712	3.32334	3.64914	3.92982	3.42392	3.54653	3.49197	2.84957	3.7946	3.7564	3.6712	3.62816	3.82872	4.09608	2.27016	2.43607	3.04688	2.48637	1.73107	2.19625	2.31932	1.83645	1.96763	1.4437	1.43808	1.34981	1.45753	1.27911	1.09929	1.11018	1.17205	0.972659	1.09284	1.26174	0.943326	1.49453	1.51425
simsample225	-59.65	5473400	3.42923	2.4911	0.00402428	0.00402428	5.91966	6.00661	0.131897	5	3.1509	2.96627	3.35271	3.31174	3.63367	3.91493	3.40898	3.5306	3.47692	2.83711	3.77364	3.73933	3.65298	3.61246	3.80867	4.07694	2.26682	2.43284	3.03895	2.48202	1.72919	2.19197	2.31513	1.83513	1.96554	1.44346	1.43785	1.3495	1.4569	1.27883	1.09948	1.11016	1.17189	0.972964	1.09276	1.26157	0.943833	1.49332	1.51351
simsample226	-54.85	4714610	3.36386	2.81641	0.00398849	0.00398849	5.89819	5.62053	0.106416	5	3.25586	3.11591	3.44743	3.39286	3.78249	3.9698	3.53536	3.64048	3.56253	2.97894	3.89166	3.80175	3.75797	3.67003	3.91293	4.11291	2.2593	2.38969	2.99095	2.43416	1.72572	2.17537	2.27868	1.81457	1.93989	1.43175	1.41634	1.33504	1.43627	1.26955	1.09898	1.11554	1.17447	0.980238	1.09889	1.26044	0.958209	1.50854	1.52428
simsample227	-52.65	4866760	3.35987	2.77428	0.00401005	0.00401005	5.85627	5.49699	0.11185	5	3.23215	3.08242	3.42599	3.37791	3.75289	3.95853	3.50695	3.614	3.54109	2.94643	3.85895	3.78322	3.72957	3.65309	3.88314	4.09786	2.26333	2.40173	3.00081	2.44572	1.72939	2.18057	2.28873	1.8239	1.95016	1.43913	1.42546	1.34244	1.44512	1.27603	1.104	1.11945	1.17915	0.983752	1.10291	1.26716	0.96132	1.51339	1.5309
simsample228	-47.1	4502430	3.3769	2.7756	0.00384663	0.00384663	5.75694	6.24489	0.0876018	5	3.59746	3.48602	3.79671	3.70714	4.18995	4.32019	3.91743	4.02489	3.92014	3.32958	4.3317	4.17062	4.16343	4.01959	4.33939	4.49567	2.40226	2.51475	3.178	2.56735	1.83146	2.31346	2.40756	1.90705	2.0405	1.50212	1.47994	1.39925	1.50372	1.33278	1.15464	1.17693	1.23781	1.03303	1.15943	1.32389	1.01113	1.59969	1.60943
simsample229	-52.45	4604340	3.37809	2.7797	0.0039048	0.0039048	5.84249	5.96323	0.0930782	5	3.43982	3.32119	3.63375	3.55519	4.00215	4.14848	3.74248	3.8481	3.75318	3.17313	4.13449	3.99708	3.97898	3.85408	4.14631	4.31365	2.32184	2.43771	3.07297	2.48736	1.77066	2.23581	2.33098	1.84837	1.97733	1.45634	1.4366	1.35705	1.45887	1.29186	1.11865	1.13884	1.19814	0.99976	1.12181	1.28251	0.977862	1.54529	1.55647
simsample230	-53.4	4384740	3.34241	2.74786	0.00391017	0.00391017	5.85124	5.89254	0.0957031	5	3.39519	3.27298	3.58921	3.51936	3.95773	4.10786	3.69355	3.7968	3.70455	3.12431	4.07353	3.94535	3.92167	3.8043	4.08527	4.25802	2.30268	2.42319	3.04929	2.4711	1.75868	2.21983	2.31817	1.84286	1.97175	1.45305	1.43395	1.35405	1.45631	1.28952	1.11779	1.13768	1.19727	0.99957	1.12148	1.28439	0.979719	1.54774	1.56073
simsample231	-62.7	5530620	3.42782	2.53203	0.0040445	0.0040445	6.07517	5.75361	0.12636	5	3.13936	2.96606	3.33685	3.29075	3.62338	3.883	3.39883	3.51683	3.45873	2.83671	3.7623	3.71494	3.63907	3.58802	3.79408	4.04485	2.23772	2.39364	2.9943	2.44214	1.70633	2.16193	2.27884	1.80572	1.93362	1.42043	1.41295	1.32733	1.43204	1.25847	1.08282	1.09457	1.15486	0.959388	1.0774	1.24186	0.931383	1.47344	1.49185
simsample232	-51.55	5664160	3.43087	2.51841	0.00396596	0.00396596	5.90904	5.65871	0.110744	5	3.3305	3.17948	3.53043	3.46019	3.85309	4.06738	3.61331	3.73099	3.65478	3.0373	4.01179	3.91481	3.86619	3.77625	4.03352	4.24889	2.30019	2.43897	3.07321	2.49169	1.75077	2.22082	2.32828	1.83805	1.96919	1.44404	1.43134	1.34799	1.45282	1.27988	1.10241	1.11825	1.17874	0.979534	1.10093	1.26432	0.952539	1.51219	1.52598
simsample233	-54.35	4224850	3.29733	2.76675	0.00394054	0.00394054	6.00986	5.73459	0.108683	5	3.2872	3.14214	3.48363	3.43934	3.83335	4.02291	3.56943	3.67245	3.59411	2.99858	3.91814	3.83377	3.78424	3.70062	3.9382	4.1457	2.29048	2.42921	3.03301	2.4717	1.75353	2.20867	2.31849	1.85406	1.98247	1.4645	1.4489	1.36531	1.46965	1.29948	1.12735	1.14434	1.20516	1.00699	1.12869	1.29792	0.988374	1.55537	1.57408
simsample234	-48.8	5265620	3.41578	2.66257	0.00391472	0.00391472	6.04658	5.8134	0.100667	5	3.451	3.31572	3.65066	3.57206	4.00141	4.18219	3.74944	3.86338	3.77547	3.16855	4.15433	4.03194	4.00041	3.88847	4.17141	4.36304	2.35134	2.47829	3.12516	2.53059	1.79037	2.26584	2.36718	1.87144	2.00324	1.47207	1.45523	1.3728	1.47733	1.305	1.12674	1.14517	1.20578	1.00398	1.12746	1.29094	0.97854	1.54986	1.56185
simsample235	-49.75	4451740	3.37705	2.83794	0.0038768	0.0038768	5.77171	6.03933	0.0767738	5	3.59527	3.50843	3.78667	3.68463	4.19467	4.28099	3.92168	4.02266	3.90777	3.35118	4.3394	4.14773	4.16289	3.99506	4.33936	4.45983	2.35655	2.45185	3.10976	2.50478	1.79605	2.268	2.35136	1.86028	1.99023	1.46527	1.44	1.3639	1.46419	1.30046	1.12806	1.15239	1.21094	1.01143	1.13515	1.29234	0.99118	1.56889	1.57509
simsample236	-55.75	4429340	3.34172	2.65171	0.00394847	0.00394847	5.79004	5.95164	0.102335	5	3.35361	3.2194	3.55023	3.48667	3.90605	4.0792	3.64479	3.75094	3.66522	3.07142	4.02232	3.91028	3.87466	3.77096	4.03705	4.22746	2.29525	2.42518	3.04865	2.47311	1.75291	2.21516	2.31902	1.84324	1.97317	1.45255	1.43584	1.35435	1.45807	1.28903	1.11613	1.13462	1.19496	0.996672	1.11879	1.28417	0.976232	1.54423	1.55902
simsample237	-52.8	4787890	3.35551	2.75385	0.00400944	0.00400944	5.74009	5.51732	0.110893	5	3.21978	3.07273	3.41255	3.36345	3.74036	3.94097	3.49416	3.60021	3.52651	2.93621	3.84604	3.76709	3.7156	3.63692	3.8689	4.07954	2.24893	2.38561	2.98267	2.42964	1.71837	2.16732	2.27438	1.81209	1.93786	1.4296	1.41573	1.33349	1.43556	1.26774	1.09699	1.11266	1.17201	0.977773	1.0964	1.25971	0.955873	1.50578	1.52295
simsample238	-51.35	4365760	3.33505	2.7636	0.00391252	0.00391252	5.81641	5.82704	0.0909199	5	3.44656	3.33297	3.64047	3.56493	4.02264	4.15532	3.7525	3.85417	3.75597	3.18092	4.13913	3.9957	3.98111	3.85158	4.14731	4.30722	2.31785	2.43307	3.06659	2.48184	1.77054	2.23454	2.33004	1.85194	1.98152	1.46031	1.43948	1.36036	1.46253	1.29629	1.12455	1.14577	1.20536	1.00677	1.12957	1.2923	0.987761	1.56101	1.57279
simsample239	-48.2	4420080	3.33192	2.78289	0.00388437	0.00388437	5.84868	5.84263	0.0981168	5	3.43701	3.30789	3.63486	3.57002	4.00696	4.1675	3.73775	3.84243	3.75135	3.15819	4.11591	3.99555	3.966	3.85392	4.13003	4.31314	2.34574	2.47188	3.10386	2.5191	1.79281	2.26077	2.36314	1.88189	2.01281	1.48483	1.46591	1.3837	1.48819	1.31765	1.14266	1.16234	1.22326	1.02173	1.14584	1.31308	1.00183	1.58017	1.59469
simsample240	-60.9	5349680	3.41609	2.47612	0.00403049	0.00403049	5.94841	5.87821	0.123869	5	3.17808	3.00808	3.3773	3.32724	3.67303	3.92468	3.44225	3.56018	3.4984	2.87384	3.81383	3.75625	3.68465	3.62617	3.8425	4.08765	2.24906	2.4036	3.01246	2.45315	1.71462	2.1744	2.29088	1.81404	1.94355	1.42632	1.41806	1.33268	1.43811	1.26417	1.08808	1.10079	1.16153	0.964834	1.08411	1.24982	0.937817	1.48655	1.50455
simsample241	-52.05	4456110	3.35435	2.65444	0.00391788	0.00391788	5.55981	5.94064	0.0912839	5	3.42836	3.31514	3.62206	3.54085	3.99765	4.13248	3.73225	3.83601	3.73825	3.16217	4.1288	3.98078	3.96726	3.83569	4.13565	4.29447	2.2961	2.41092	3.04703	2.46175	1.75169	2.21563	2.31028	1.83073	1.96043	1.44146	1.42148	1.34322	1.44496	1.27957	1.10842	1.12944	1.18866	0.991465	1.11351	1.27434	0.971544	1.54034	1.5511
simsample242	-52.75	4221810	3.31611	2.80582	0.00390935	0.00390935	6.02625	5.76686	0.0873907	5	3.45909	3.35279	3.65144	3.57521	4.044	4.16122	3.76875	3.86724	3.76526	3.1994	4.15255	4.00079	3.99246	3.85596	4.15813	4.30756	2.31547	2.4265	3.05864	2.47467	1.77022	2.23224	2.32551	1.85068	1.97976	1.46025	1.43801	1.3598	1.46132	1.2966	1.12628	1.14841	1.20769	1.00959	1.13237	1.29467	0.992076	1.56658	1.57789
simsample243	-58.65	4424250	3.33347	2.6579	0.00398536	0.00398536	5.8044	5.87448	0.113211	5	3.22908	3.07768	3.42502	3.37875	3.75583	3.96251	3.50365	3.61044	3.53747	2.93729	3.8575	3.78096	3.72536	3.64944	3.87955	4.09642	2.25827	2.4006	3.00176	2.44496	1.7263	2.17945	2.29039	1.82566	1.95358	1.43988	1.42668	1.34331	1.44722	1.27733	1.1054	1.12105	1.18144	0.985327	1.10545	1.27236	0.964451	1.52191	1.5403
simsample244	-55.4	4779820	3.39053	2.80648	0.00397457	0.00397457	5.87219	5.83693	0.102264	5	3.31932	3.18516	3.51163	3.44646	3.85245	4.03055	3.60586	3.71303	3.63031	3.04609	3.97825	3.8732	3.83753	3.73783	3.99766	4.18865	2.28262	2.40769	3.02245	2.4547	1.74115	2.19695	2.2969	1.82386	1.95019	1.43767	1.42115	1.3404	1.44159	1.27454	1.10242	1.11986	1.17871	0.983171	1.10263	1.26266	0.959768	1.51327	1.52687
simsample245	-53.55	4823690	3.38545	2.7947	0.00398355	0.00398355	5.79454	5.64672	0.094664	5	3.35588	3.23658	3.54579	3.47054	3.90137	4.05126	3.64997	3.75422	3.66336	3.09339	4.03172	3.90281	3.88199	3.76393	4.04507	4.21367	2.27308	2.38804	3.00809	2.43634	1.73321	2.18811	2.28207	1.80963	1.93557	1.42587	1.40706	1.32878	1.42847	1.26456	1.09463	1.11389	1.17193	0.977785	1.097	1.25424	0.955702	1.50941	1.52067
simsample246	-48.25	5139840	3.41645	2.64663	0.00387816	0.00387816	5.97853	5.97969	0.0918072	5	3.56866	3.44905	3.76943	3.67542	4.14414	4.29447	3.88243	3.9957	3.89592	3.2939	4.30937	4.15414	4.14071	4.00326	4.31942	4.48715	2.38809	2.50491	3.17231	2.56006	1.81691	2.30127	2.39702	1.89103	2.02495	1.48643	1.46653	1.38546	1.49018	1.31816	1.1388	1.15974	1.22052	1.01638	1.14198	1.30496	0.99164	1.57403	1.58319
simsample247	-58.2	4437590	3.34881	2.72791	0.00393117	0.00393117	6.10946	5.94158	0.100961	5	3.35785	3.22583	3.55306	3.48914	3.9093	4.07877	3.64979	3.75517	3.66878	3.07989	4.0245	3.91194	3.87835	3.77338	4.04	4.22741	2.29855	2.42565	3.0471	2.47291	1.75542	2.21601	2.31811	1.84335	1.97225	1.45335	1.43605	1.35485	1.45782	1.28947	1.11684	1.13541	1.19535	0.997498	1.11915	1.28327	0.976708	1.54242	1.55684
simsample248	-51.45	4785790	3.34377	2.75669	0.00401374	0.00401374	5.76314	5.48546	0.118196	5	3.18214	3.02228	3.37717	3.33942	3.69476	3.91885	3.44972	3.55714	3.49048	2.88833	3.78999	3.73281	3.6677	3.60588	3.81751	4.04781	2.25531	2.40246	2.99254	2.44456	1.72482	2.17383	2.28737	1.82667	1.95296	1.4421	1.43032	1.34564	1.44938	1.27863	1.10628	1.12035	1.18065	0.985069	1.10414	1.27116	0.962961	1.51438	1.53437
simsample249	-52.7	4234550	3.30123	2.80851	0.00392328	0.00392328	6.02058	5.67253	0.0974198	5	3.37991	3.25456	3.57438	3.51499	3.94786	4.09953	3.67667	3.77687	3.68625	3.10591	4.04127	3.9232	3.89459	3.78419	4.05412	4.23198	2.30781	2.43219	3.05018	2.47718	1.76607	2.22476	2.32618	1.85679	1.98555	1.46629	1.44699	1.36606	1.46903	1.30155	1.13031	1.15006	1.21016	1.01173	1.13417	1.30026	0.993993	1.56602	1.5811
simsample250	-51.25	4194700	3.30206	2.79903	0.00390935	0.00390935	6.0171	5.75576	0.0920091	5	3.45251	3.33641	3.64776	3.57956	4.03645	4.16995	3.75904	3.85879	3.76106	3.18324	4.13639	3.999	3.98098	3.8555	4.14505	4.30898	2.33207	2.45071	3.08162	2.4977	1.78417	2.24873	2.34699	1.87105	2.0013	1.47701	1.45587	1.37567	1.47891	1.31141	1.13929	1.1606	1.22088	1.02075	1.14461	1.3106	1.0034	1.58288	1.59622
simsample251	-57.95	4180260	3.31448	2.80604	0.00394916	0.00394916	6.02454	5.87942	0.103377	5	3.31417	3.17863	3.50831	3.45567	3.86402	4.03706	3.6014	3.7035	3.62028	3.03488	3.95729	3.85816	3.81866	3.72322	3.97477	4.16798	2.28806	2.41852	3.02644	2.46229	1.75049	2.20502	2.3096	1.844	1.97158	1.45618	1.43907	1.35722	1.46008	1.2921	1.12094	1.13896	1.19894	1.00186	1.12299	1.28886	0.982852	1.54722	1.56375
simsample252	-46.3	4597010	3.36393	2.78568	0.00386747	0.00386747	5.73792	5.88944	0.08697	5	3.55211	3.44356	3.74859	3.66169	4.14093	4.2654	3.86887	3.97354	3.86928	3.28839	4.27483	4.11483	4.10861	3.96568	4.28158	4.43377	2.37079	2.48157	3.13495	2.533	1.80854	2.28362	2.37657	1.88429	2.01606	1.48477	1.46252	1.38295	1.48613	1.31766	1.14227	1.16456	1.22473	1.02254	1.14749	1.31042	1.00179	1.58433	1.5942
simsample253	-53.75	4153140	3.29903	2.7836	0.00392178	0.00392178	5.94019	5.65916	0.0903968	5	3.39085	3.28043	3.58177	3.51268	3.96639	4.09076	3.69303	3.79011	3.69247	3.1291	4.06534	3.925	3.91064	3.78343	4.07219	4.22781	2.2822	2.39655	3.01633	2.44307	1.74603	2.2013	2.29645	1.83013	1.95784	1.44449	1.42331	1.34527	1.44621	1.28271	1.11454	1.13585	1.19478	0.998928	1.12031	1.28251	0.982304	1.5506	1.56314
simsample254	-52.65	4243510	3.32224	2.75801	0.00393468	0.00393468	5.79651	5.98468	0.10622	5	3.33101	3.18902	3.52815	3.47628	3.88049	4.06595	3.61807	3.72306	3.64184	3.04445	3.97859	3.88464	3.83995	3.74894	3.99765	4.2003	2.30774	2.44324	3.0572	2.48788	1.76493	2.22491	2.33257	1.86105	1.99034	1.46898	1.45284	1.36955	1.47399	1.30334	1.12976	1.1473	1.20814	1.0089	1.13122	1.29935	0.988973	1.55819	1.57539
simsample255	-56.85	4397000	3.33346	2.81026	0.00396448	0.00396448	5.97606	5.88251	0.117965	5	3.21142	3.05035	3.40786	3.37254	3.73065	3.95507	3.48155	3.58867	3.52132	2.91568	3.81951	3.76392	3.69795	3.63659	3.84775	4.07991	2.28008	2.42839	3.02082	2.46961	1.74473	2.19655	2.31124	1.84845	1.97545	1.46031	1.44803	1.36238	1.46698	1.29475	1.12106	1.1353	1.19616	0.998694	1.11889	1.28796	0.976954	1.53404	1.55471
simsample256	-59.75	5428600	3.40041	2.43563	0.00403049	0.00403049	5.92451	5.82945	0.136706	5	3.11961	2.92808	3.32333	3.29088	3.60226	3.89494	3.37354	3.4946	3.44448	2.7976	3.72971	3.70688	3.61223	3.58127	3.76537	4.04434	2.26109	2.43521	3.03592	2.48291	1.72655	2.18888	2.31736	1.84063	1.97211	1.44839	1.44424	1.35449	1.46342	1.2837	1.10414	1.11414	1.1768	0.977162	1.09767	1.27028	0.949463	1.50271	1.52538
simsample257	-52.55	4184700	3.31627	2.78826	0.00391545	0.00391545	5.98774	5.97053	0.101797	5	3.37145	3.23704	3.56807	3.51166	3.93166	4.10162	3.6646	3.76796	3.68176	3.09012	4.0294	3.92298	3.8862	3.78505	4.04568	4.23696	2.31885	2.44909	3.06814	2.4942	1.77367	2.23517	2.33994	1.86691	1.99644	1.47387	1.4561	1.37363	1.47772	1.30791	1.13461	1.15329	1.21399	1.01429	1.13716	1.30473	0.995115	1.56777	1.58387
simsample258	-46.8	4479420	3.36499	2.80234	0.00385597	0.00385597	5.66783	5.97677	0.0804515	5	3.59338	3.49847	3.78766	3.69135	4.19342	4.29289	3.91789	4.0202	3.90844	3.34046	4.33258	4.15113	4.15855	3.99886	4.33437	4.46654	2.36973	2.47151	3.13049	2.52415	1.80719	2.28229	2.36985	1.87688	2.00831	1.47862	1.45431	1.37667	1.4786	1.31248	1.13847	1.16229	1.22178	1.02038	1.14524	1.30566	1.00034	1.58337	1.59108
simsample259	-52.4	4921990	3.40849	2.82328	0.00395052	0.00395052	5.96565	5.89822	0.097232	5	3.41487	3.28747	3.60903	3.53318	3.96185	4.12753	3.71181	3.82072	3.73145	3.14476	4.10129	3.97842	3.95227	3.83826	4.11844	4.29906	2.32597	2.44552	3.07768	2.49481	1.77235	2.2372	2.33405	1.84958	1.97768	1.45704	1.43877	1.35807	1.45986	1.29151	1.11682	1.13554	1.19473	0.996369	1.11763	1.27755	0.971975	1.53378	1.54541
simsample260	-54.55	5237370	3.40802	2.65667	0.00398355	0.00398355	6.10311	5.84068	0.118209	5	3.27476	3.11016	3.47507	3.42369	3.78804	4.02576	3.54932	3.66558	3.59786	2.97465	3.92003	3.85427	3.78959	3.72209	3.94887	4.18577	2.30932	2.45831	3.07563	2.50635	1.76162	2.22709	2.3411	1.85836	1.98843	1.46359	1.45258	1.36644	1.47238	1.29697	1.11852	1.13251	1.19378	0.993581	1.11495	1.28225	0.966932	1.52632	1.544
simsample261	-59.65	5502820	3.41867	2.56543	0.00401311	0.00401311	6.16784	5.71579	0.125989	5	3.17338	2.99882	3.37267	3.32806	3.66467	3.92485	3.43589	3.55396	3.49488	2.86813	3.79897	3.75207	3.67556	3.62424	3.83112	4.0837	2.26372	2.42093	3.02566	2.46895	1.72686	2.18622	2.30435	1.82801	1.95699	1.43874	1.43085	1.34426	1.45001	1.27478	1.09755	1.10954	1.1705	0.972923	1.09227	1.25892	0.945217	1.49381	1.51283
simsample262	-55.25	4351350	3.33495	2.80758	0.00396448	0.00396448	5.8661	5.92476	0.111392	5	3.26686	3.11651	3.4627	3.4181	3.79894	4.00231	3.54518	3.6511	3.57668	2.97801	3.8941	3.81862	3.76444	3.68749	3.91797	4.13361	2.28969	2.42985	3.03184	2.47275	1.75124	2.20579	2.31577	1.84936	1.97686	1.46042	1.44604	1.36197	1.46591	1.29517	1.12195	1.13784	1.19837	1.00067	1.12144	1.28886	0.979521	1.54016	1.5587
simsample263	-46.35	4430370	3.35648	2.80534	0.00385597	0.00385597	5.69969	5.94864	0.0782647	5	3.61608	3.52571	3.81027	3.71186	4.22384	4.31389	3.9444	4.04549	3.93069	3.36577	4.36134	4.17233	4.18422	4.01858	4.36102	4.48656	2.3755	2.47507	3.13703	2.52805	1.81218	2.2884	2.37485	1.88126	2.0131	1.48227	1.45711	1.37985	1.48181	1.316	1.14215	1.16666	1.2262	1.02437	1.14972	1.31036	1.00506	1.59114	1.59841
simsample264	-56.55	4415610	3.3309	2.75553	0.00396426	0.00396426	6.04794	5.9442	0.119117	5	3.24153	3.07694	3.441	3.4055	3.76606	3.99631	3.51377	3.62274	3.55537	2.93974	3.85734	3.80206	3.7337	3.67297	3.8856	4.12284	2.30204	2.45404	3.05414	2.49619	1.76137	2.21917	2.33637	1.86773	1.99678	1.47498	1.46308	1.37627	1.4825	1.30789	1.13208	1.14634	1.20811	1.00826	1.13002	1.30168	0.986374	1.5506	1.57176
simsample265	-50.55	4867580	3.40012	2.82469	0.00390887	0.00390887	5.95962	5.91129	0.0954324	5	3.45732	3.33237	3.65291	3.57509	4.01455	4.17409	3.75926	3.86792	3.77562	3.18685	4.15298	4.02349	4.0005	3.88113	4.16856	4.3454	2.34717	2.46581	3.10471	2.51556	1.78891	2.25791	2.35462	1.86635	1.99572	1.47046	1.45136	1.37038	1.47296	1.30366	1.12791	1.14734	1.20703	1.00691	1.12948	1.29084	0.983056	1.55155	1.56302
simsample266	-56.6	4889530	3.37975	2.84349	0.00403555	0.00403555	5.85352	5.63542	0.11926	5	3.1526	2.99128	3.34507	3.30658	3.65076	3.88141	3.41643	3.52515	3.46139	2.86359	3.75403	3.7031	3.63645	3.57889	3.78486	4.01781	2.24475	2.39015	2.97475	2.43221	1.71559	2.16078	2.27246	1.81309	1.93726	1.43148	1.42026	1.33591	1.4382	1.26841	1.0963	1.10948	1.16887	0.974996	1.0923	1.25593	0.950608	1.49223	1.51146
simsample267	-53.4	4864550	3.37619	2.85182	0.00403555	0.00403555	5.80932	5.63673	0.117767	5	3.17682	3.01723	3.36989	3.32999	3.68045	3.90694	3.44344	3.55197	3.48637	2.8881	3.78341	3.72841	3.66396	3.60301	3.81341	4.04363	2.25622	2.40045	2.98866	2.44268	1.7244	2.1716	2.28279	1.82145	1.94615	1.43817	1.42636	1.34198	1.44453	1.27444	1.10186	1.11547	1.17505	0.980351	1.09828	1.26241	0.956233	1.50109	1.52011
simsample268	-50.35	4519480	3.36171	2.77844	0.00390849	0.00390849	5.74306	5.92287	0.0923019	5	3.4571	3.33975	3.65184	3.57433	4.02704	4.169	3.76228	3.86681	3.77028	3.18965	4.15346	4.01354	3.99655	3.86958	4.16405	4.32947	2.33083	2.44699	3.0841	2.49643	1.77867	2.24532	2.34106	1.85819	1.98791	1.4646	1.44436	1.3646	1.46699	1.29954	1.12612	1.14678	1.20646	1.00712	1.12999	1.29219	0.986235	1.55836	1.56987
simsample269	-57.1	4849650	3.37759	2.7985	0.00403194	0.00403194	5.79321	5.61671	0.110165	5	3.21869	3.07269	3.41018	3.35842	3.73388	3.93458	3.49279	3.59965	3.52611	2.93871	3.84636	3.76677	3.71673	3.63718	3.87032	4.07952	2.24775	2.38193	2.97878	2.42632	1.71637	2.16436	2.26952	1.80643	1.93124	1.42494	1.41097	1.32913	1.43036	1.26316	1.09239	1.10788	1.16672	0.973191	1.09106	1.25225	0.950015	1.49559	1.5119
simsample270	-47.5	4619300	3.38087	2.77606	0.00386747	0.00386747	5.68547	5.88031	0.0732255	5	3.63193	3.55292	3.82336	3.71281	4.23987	4.31236	3.96403	4.06498	3.945	3.39171	4.39438	4.18605	4.20985	4.02988	4.39019	4.49883	2.35847	2.44958	3.11608	2.50454	1.79644	2.27141	2.35219	1.85738	1.98823	1.46174	1.43559	1.3605	1.46066	1.29763	1.12536	1.15069	1.20913	1.00944	1.13365	1.28993	0.989411	1.56976	1.57443
simsample271	-54.55	4840310	3.35428	2.81368	0.00405626	0.00405626	5.76596	5.37801	0.115851	5	3.14307	2.98937	3.33368	3.29377	3.64787	3.86214	3.40824	3.5135	3.4462	2.85865	3.74414	3.68344	3.62322	3.55838	3.77102	3.99224	2.22171	2.36258	2.94378	2.40409	1.6987	2.13974	2.24897	1.79543	1.91893	1.41768	1.40531	1.32261	1.42387	1.25678	1.08749	1.10166	1.16055	0.968553	1.08533	1.248	0.946379	1.48706	1.50584
simsample272	-53.55	4150890	3.29531	2.77955	0.00395078	0.00395078	6.05343	5.88279	0.109222	5	3.32237	3.17457	3.52116	3.47778	3.87432	4.06784	3.6073	3.71143	3.6328	3.02978	3.95807	3.87504	3.82374	3.74081	3.97893	4.1905	2.31864	2.45973	3.06938	2.50231	1.77535	2.23551	2.34711	1.87777	2.00759	1.4835	1.46782	1.38302	1.48866	1.31629	1.14206	1.1591	1.22069	1.02011	1.14324	1.31477	1.00131	1.57497	1.5942
simsample273	-54.5	4793630	3.38231	2.80549	0.0039701	0.0039701	5.79791	5.74849	0.10543	5	3.28754	3.14816	3.4801	3.42073	3.81556	4.00304	3.56987	3.67698	3.59772	3.01062	3.93483	3.84011	3.79836	3.70674	3.95608	4.15504	2.27508	2.40432	3.01319	2.45025	1.73636	2.19015	2.29263	1.82266	1.94876	1.43728	1.4217	1.34025	1.4418	1.27421	1.10221	1.11894	1.17799	0.982672	1.10188	1.26304	0.959481	1.51173	1.52658
simsample274	-55.4	4447260	3.35916	2.83087	0.00398969	0.00398969	5.68987	5.8982	0.104204	5	3.27945	3.14303	3.47103	3.41439	3.81229	3.99209	3.56223	3.66658	3.58605	3.00457	3.92076	3.82468	3.78468	3.69171	3.94063	4.13526	2.26735	2.39538	2.99967	2.44002	1.73202	2.18288	2.28498	1.81976	1.94537	1.43601	1.41978	1.33877	1.43998	1.27347	1.10288	1.12004	1.17899	0.984304	1.1034	1.26499	0.962728	1.51562	1.53092
simsample275	-49.95	4319830	3.29959	2.67182	0.00394142	0.00394142	5.61977	5.65049	0.103332	5	3.32727	3.19228	3.52354	3.46848	3.88427	4.05506	3.61633	3.719	3.6342	3.04348	3.98047	3.87476	3.8363	3.73717	3.99492	4.18678	2.28598	2.4184	3.03292	2.4638	1.74881	2.20705	2.31303	1.84471	1.97423	1.45537	1.43845	1.35665	1.46059	1.29195	1.12058	1.13909	1.19963	1.0017	1.12385	1.29146	0.983653	1.55351	1.56997
simsample276	-59.7	4755440	3.3533	2.76547	0.00406406	0.00406406	5.82714	5.51561	0.121079	5	3.09802	2.93664	3.2893	3.25503	3.59318	3.82298	3.35696	3.46345	3.40127	2.80781	3.68751	3.63976	3.57109	3.51695	3.71679	3.94982	2.2084	2.35574	2.93112	2.39673	1.68887	2.12831	2.24121	1.78994	1.91345	1.41318	1.40262	1.31895	1.42081	1.25271	1.08324	1.09623	1.15539	0.963751	1.08011	1.24396	0.941202	1.47925	1.49943
simsample277	-50.75	4292300	3.30084	2.7588	0.00388694	0.00388694	6.09949	5.703	0.0954138	5	3.45289	3.32957	3.65071	3.58584	4.03521	4.18176	3.75747	3.85924	3.76441	3.17594	4.13499	4.00587	3.98129	3.86256	4.14553	4.31999	2.34417	2.46841	3.10142	2.51544	1.79341	2.26129	2.36305	1.8841	2.01561	1.48705	1.46696	1.38536	1.49	1.32026	1.14643	1.16713	1.22817	1.02646	1.1512	1.3196	1.00873	1.59187	1.60633
simsample278	-50.65	4381500	3.36163	2.81909	0.00388714	0.00388714	5.77797	6.12585	0.0930902	5	3.47148	3.35163	3.6672	3.59173	4.04278	4.18879	3.77733	3.88233	3.78644	3.20218	4.16655	4.0305	4.01135	3.88679	4.17862	4.34791	2.34772	2.46534	3.10363	2.51426	1.79195	2.26049	2.35731	1.87254	2.00263	1.47653	1.45627	1.37567	1.47865	1.30996	1.13534	1.15585	1.21589	1.0153	1.13878	1.30215	0.994145	1.56897	1.58099
simsample279	-50.3	4405540	3.33543	2.7861	0.00390962	0.00390962	5.94026	5.84568	0.0943596	5	3.45343	3.33189	3.64972	3.57921	4.02785	4.17466	3.75778	3.86125	3.76627	3.18093	4.14103	4.00881	3.98689	3.86562	4.15243	4.32422	2.33995	2.46056	3.09507	2.50862	1.78783	2.25508	2.35404	1.87289	2.00338	1.47737	1.45736	1.37647	1.48001	1.31117	1.13727	1.15777	1.21816	1.01752	1.14129	1.30657	0.997899	1.57508	1.5882
simsample280	-50.15	4485470	3.37388	2.79698	0.0038768	0.0038768	5.84843	6.10734	0.0849807	5	3.56343	3.4589	3.75894	3.6679	4.15279	4.27091	3.88205	3.98665	3.88042	3.3037	4.29213	4.12565	4.12375	3.97573	4.2979	4.44417	2.3696	2.47698	3.13229	2.52897	1.80671	2.28164	2.37239	1.87923	2.01059	1.4804	1.45762	1.37874	1.48127	1.31365	1.1386	1.16121	1.22099	1.01933	1.14396	1.30534	0.998208	1.57909	1.58801
simsample281	-52.65	4252680	3.294	2.75686	0.00392139	0.00392139	6.1215	5.73715	0.108726	5	3.32472	3.17801	3.52356	3.47899	3.87794	4.06936	3.61022	3.7143	3.63498	3.03234	3.96295	3.87739	3.82724	3.74259	3.98299	4.19283	2.31615	2.45675	3.06756	2.49972	1.77331	2.23377	2.34507	1.87546	2.00548	1.48137	1.46559	1.38103	1.48666	1.31451	1.14046	1.15769	1.21926	1.01877	1.14195	1.31337	1.00014	1.57416	1.59316
simsample282	-51.2	5114610	3.40693	2.60579	0.0038709	0.0038709	6.13744	5.97576	0.0974445	5	3.51854	3.38834	3.72074	3.63564	4.08511	4.25467	3.82516	3.93949	3.84602	3.23505	4.24304	4.10542	4.08054	3.95728	4.25617	4.43969	2.37716	2.5022	3.16269	2.55641	1.80977	2.29266	2.39333	1.8903	2.02454	1.48615	1.46817	1.38577	1.4915	1.31802	1.13831	1.15803	1.21935	1.01512	1.14061	1.30586	0.990448	1.57197	1.58314
simsample283	-58.15	4175140	3.31592	2.79325	0.00394916	0.00394916	6.01702	5.88621	0.101312	5	3.32542	3.19384	3.51902	3.46297	3.87834	4.04411	3.61484	3.71649	3.63104	3.04893	3.9746	3.86847	3.8331	3.73238	3.99037	4.17757	2.2855	2.4132	3.0235	2.45767	1.74818	2.20292	2.3058	1.83968	1.96727	1.45241	1.43472	1.35358	1.45607	1.28888	1.1182	1.13672	1.19648	0.999732	1.12081	1.28579	0.9809	1.54531	1.56105
simsample284	-59.8	5627380	3.43421	2.45709	0.00401672	0.00401672	6.03189	5.87533	0.123898	5	3.22304	3.05053	3.42492	3.37083	3.72076	3.97811	3.49065	3.61187	3.54961	2.91533	3.87304	3.81311	3.74104	3.6809	3.90253	4.15135	2.27859	2.43464	3.05475	2.48615	1.73598	2.20315	2.3205	1.83452	1.9658	1.44148	1.43337	1.34701	1.45367	1.27732	1.09841	1.11111	1.17244	0.973251	1.09382	1.26054	0.944686	1.49865	1.51606
simsample285	-50.45	5007540	3.40894	2.88972	0.00399423	0.00399423	5.66481	5.70745	0.106975	5	3.26304	3.12075	3.4539	3.39556	3.77868	3.97436	3.54153	3.64985	3.57379	2.98861	3.90252	3.81595	3.77126	3.68527	3.92738	4.13113	2.27082	2.3997	3.0033	2.44501	1.7322	2.18302	2.28473	1.81583	1.94017	1.43213	1.41712	1.33553	1.43608	1.26882	1.09672	1.11252	1.17095	0.976719	1.09459	1.25354	0.951648	1.49636	1.51099
simsample286	-59.8	5543680	3.42871	2.47026	0.00402428	0.00402428	5.95806	5.92756	0.130334	5	3.16296	2.98085	3.36484	3.32108	3.64885	3.92507	3.42278	3.54428	3.48884	2.85007	3.79145	3.75153	3.66809	3.62344	3.82503	4.08919	2.26638	2.43051	3.03947	2.48027	1.72836	2.19193	2.314	1.83302	1.96369	1.44134	1.43528	1.34743	1.45469	1.27707	1.09798	1.1091	1.17075	0.971904	1.09185	1.26026	0.943032	1.49343	1.51306
simsample287	-58.05	4772290	3.39744	2.79575	0.00396518	0.00396518	6.0332	5.9865	0.104119	5	3.33201	3.19342	3.52614	3.46173	3.86434	4.05104	3.61848	3.7276	3.64638	3.05451	3.99319	3.8924	3.85316	3.7568	4.01417	4.21175	2.29841	2.42659	3.04506	2.47403	1.75289	2.21222	2.31405	1.83697	1.96425	1.44777	1.43182	1.35003	1.45219	1.28331	1.10944	1.1265	1.18586	0.988824	1.10901	1.27037	0.964606	1.52094	1.53493
simsample288	-51.4	5667860	3.42802	2.50895	0.00396723	0.00396723	5.89169	5.6441	0.109114	5	3.35789	3.2092	3.55861	3.48577	3.8867	4.09591	3.64399	3.76166	3.68315	3.06486	4.04705	3.94401	3.89834	3.80373	4.06736	4.27901	2.31082	2.44826	3.08748	2.50155	1.75869	2.23132	2.33817	1.8453	1.97721	1.44956	1.43628	1.35301	1.45816	1.28493	1.10698	1.12334	1.18405	0.983988	1.10609	1.26996	0.957271	1.52056	1.53396
simsample289	-46.6	4387240	3.33203	2.71404	0.00387044	0.00387044	5.60778	5.95036	0.0935372	5	3.50431	3.38334	3.70366	3.62912	4.08951	4.23416	3.81399	3.91898	3.82121	3.22777	4.20826	4.06794	4.04816	3.92124	4.21755	4.38805	2.36428	2.48602	3.13244	2.53591	1.80605	2.2807	2.38066	1.89208	2.02504	1.49157	1.47125	1.3898	1.49486	1.3241	1.14823	1.16939	1.23062	1.02745	1.15308	1.32054	1.00797	1.59414	1.60695
simsample290	-49	4556450	3.35343	2.7438	0.00388585	0.00388585	5.84506	5.85907	0.0931509	5	3.47332	3.35387	3.66999	3.59335	4.04788	4.19258	3.77979	3.88495	3.78835	3.20178	4.17303	4.03354	4.01491	3.88854	4.18332	4.35171	2.34301	2.46171	3.10275	2.51151	1.7884	2.25838	2.35591	1.87037	2.0014	1.47409	1.45401	1.37355	1.47702	1.30817	1.13367	1.15442	1.21471	1.0139	1.13781	1.30197	0.993342	1.57052	1.58251
simsample291	-57.6	4265160	3.31042	2.74049	0.00392139	0.00392139	6.17325	5.79441	0.102993	5	3.33712	3.2019	3.53298	3.47801	3.89272	4.06451	3.62684	3.72976	3.64508	3.05512	3.98933	3.88537	3.84696	3.74838	4.00526	4.19767	2.29673	2.42808	3.04243	2.47304	1.75686	2.21525	2.32053	1.85123	1.98026	1.46111	1.44394	1.3619	1.46562	1.29673	1.12474	1.14314	1.20358	1.00532	1.12741	1.29451	0.986564	1.5557	1.57205
simsample292	-57.75	4892070	3.41253	2.90317	0.00402296	0.00402296	5.72862	5.84627	0.108445	5	3.23125	3.08724	3.42095	3.36488	3.73993	3.93973	3.50616	3.61429	3.54046	2.95736	3.86248	3.7814	3.73424	3.65254	3.88858	4.0951	2.25613	2.3858	2.98361	2.43052	1.72108	2.16855	2.27048	1.80495	1.92828	1.42371	1.40925	1.32779	1.42779	1.26119	1.08992	1.10519	1.16327	0.970279	1.08721	1.24529	0.944953	1.48499	1.49989
simsample293	-49.85	4527650	3.35999	2.805	0.00391082	0.00391082	5.75247	5.90457	0.0960478	5	3.4265	3.30186	3.6217	3.55086	3.98891	4.14438	3.72673	3.83188	3.73989	3.15457	4.10939	3.98331	3.95849	3.84196	4.12329	4.29977	2.32949	2.45036	3.08136	2.49843	1.77835	2.24335	2.34192	1.86123	1.99055	1.46771	1.44855	1.36772	1.47052	1.30205	1.1282	1.14788	1.20779	1.00837	1.13098	1.29431	0.987142	1.55755	1.57045
simsample294	-61.75	5615510	3.4206	2.47641	0.00402413	0.00402413	6.11317	5.67468	0.127037	5	3.15586	2.98073	3.35546	3.30906	3.64442	3.90672	3.41667	3.53563	3.47721	2.84874	3.78447	3.736	3.65889	3.60755	3.8154	4.06869	2.24732	2.40584	3.01158	2.45509	1.71365	2.17299	2.29171	1.81533	1.94479	1.42749	1.4203	1.33409	1.43994	1.26502	1.08833	1.10022	1.16114	0.964296	1.08337	1.24974	0.936612	1.48379	1.50259
simsample295	-55.55	4375220	3.35133	2.82171	0.00395082	0.00395082	5.78926	6.041	0.109525	5	3.28324	3.13576	3.47851	3.42939	3.81521	4.01451	3.56365	3.67023	3.59419	2.99764	3.91788	3.83679	3.78621	3.70478	3.9413	4.15258	2.2932	2.43021	3.03578	2.47407	1.75282	2.20833	2.31618	1.84732	1.97464	1.45833	1.44351	1.35998	1.46341	1.29315	1.11973	1.1359	1.19612	0.998564	1.11916	1.28501	0.9766	1.53603	1.55347
simsample296	-47.65	4410840	3.33447	2.77791	0.00389888	0.00389888	5.65347	5.88952	0.0988194	5	3.43253	3.30205	3.63056	3.56619	4.00068	4.16406	3.73241	3.83754	3.74726	3.15274	4.11043	3.99199	3.96115	3.85063	4.12507	4.3102	2.34527	2.47225	3.10393	2.51949	1.79229	2.26032	2.36314	1.88168	2.01262	1.48457	1.46592	1.38355	1.48812	1.31735	1.14219	1.16168	1.22264	1.02109	1.14515	1.31247	1.00096	1.57887	1.59352
simsample297	-54.2	4753980	3.35907	2.82305	0.00402651	0.00402651	5.81563	5.54614	0.113242	5	3.18987	3.03902	3.38162	3.33747	3.7026	3.91096	3.46023	3.56607	3.49564	2.90629	3.80323	3.73462	3.67851	3.60724	3.82896	4.04569	2.24391	2.38246	2.97198	2.42497	1.71514	2.16069	2.26873	1.80991	1.93444	1.42887	1.4156	1.33286	1.43456	1.26673	1.09618	1.11104	1.1702	0.976641	1.09446	1.25749	0.954254	1.49996	1.51795
simsample298	-47.6	4395670	3.33053	2.78673	0.00389185	0.00389185	5.66985	5.86756	0.100416	5	3.41453	3.28125	3.61253	3.55145	3.97944	4.14785	3.71195	3.81697	3.72864	3.13306	4.08537	3.97289	3.93879	3.83282	4.10123	4.29062	2.34121	2.4702	3.09816	2.51668	1.78967	2.25628	2.36032	1.88079	2.01143	1.48424	1.46605	1.38331	1.48797	1.317	1.14197	1.16104	1.22205	1.02072	1.14456	1.31234	1.00067	1.57745	1.59278
simsample299	-60.85	5453230	3.43189	2.46863	0.00402428	0.00402428	5.88123	6.0106	0.126783	5	3.17855	3.00261	3.37928	3.33031	3.66814	3.93265	3.44118	3.56183	3.50302	2.8703	3.8149	3.76461	3.68775	3.63507	3.8462	4.10066	2.26128	2.42004	3.03155	2.4704	1.72359	2.1865	2.30529	1.82429	1.95452	1.43399	1.42682	1.34024	1.44656	1.2706	1.09257	1.10448	1.16561	0.967653	1.08727	1.25382	0.939085	1.48835	1.50668
simsample300	-50.8	4433490	3.35369	2.6979	0.00388718	0.00388718	5.73325	6.13278	0.0984729	5	3.45342	3.32326	3.65277	3.58199	4.02144	4.18616	3.75511	3.86286	3.77153	3.17206	4.14565	4.02063	3.99167	3.877	4.15918	4.34338	2.34952	2.47619	3.1165	2.52577	1.79351	2.26582	2.36815	1.88068	2.0128	1.482	1.46367	1.38146	1.48644	1.31504	1.13879	1.15841	1.21951	1.01736	1.14186	1.30864	0.99613	1.57525	1.58887
simsample301	-53.45	5435010	3.43679	2.67643	0.00395988	0.00395988	5.96446	5.71884	0.0991411	5	3.3997	3.26942	3.59487	3.51267	3.93717	4.11193	3.69371	3.80671	3.71933	3.1259	4.09734	3.97226	3.94469	3.8309	4.11426	4.29861	2.30981	2.4312	3.06918	2.48341	1.75708	2.22432	2.32152	1.83238	1.9612	1.44055	1.42369	1.34329	1.44518	1.27657	1.10144	1.11957	1.17858	0.980944	1.10165	1.26005	0.954763	1.51252	1.52308
simsample302	-56.25	4220770	3.30721	2.82302	0.00394785	0.00394785	5.93244	5.7556	0.107194	5	3.27774	3.13575	3.47206	3.42636	3.82048	4.00538	3.55971	3.66189	3.58299	2.99434	3.90645	3.82035	3.77351	3.68807	3.92668	4.12976	2.28153	2.41674	3.01723	2.45892	1.74639	2.19838	2.30583	1.84375	1.9708	1.45671	1.44068	1.35789	1.46106	1.29239	1.12126	1.13832	1.19848	1.00167	1.1224	1.28944	0.982691	1.54494	1.56298
simsample303	-49.7	4362130	3.33947	2.7795	0.00389748	0.00389748	5.86251	6.10109	0.109079	5	3.36437	3.21457	3.56477	3.51427	3.91311	4.11385	3.65231	3.76081	3.68193	3.07099	4.01621	3.93018	3.87943	3.79414	4.03865	4.25301	2.34476	2.48525	3.10639	2.53037	1.7926	2.25945	2.37019	1.89056	2.02146	1.49224	1.47691	1.39157	1.49775	1.32353	1.14635	1.16323	1.22504	1.02268	1.14649	1.31702	1.00104	1.57597	1.59392
simsample304	-51.45	4413930	3.33402	2.73494	0.00390276	0.00390276	5.86461	5.85316	0.0971496	5	3.42095	3.29483	3.61763	3.54997	3.98896	4.14481	3.72097	3.82525	3.73339	3.14447	4.10201	3.97684	3.94997	3.83485	4.11443	4.2929	2.32601	2.45022	3.08119	2.49818	1.77713	2.24298	2.34394	1.86458	1.99507	1.47039	1.45149	1.3703	1.47406	1.305	1.13137	1.15123	1.21169	1.01166	1.13503	1.30074	0.99195	1.56691	1.58073
simsample305	-47.55	4357110	3.3523	2.8093	0.00385628	0.00385628	5.69716	5.96702	0.0767613	5	3.61211	3.52534	3.80513	3.7056	4.22144	4.30472	3.94122	4.04102	3.92481	3.36511	4.35768	4.16451	4.17943	4.0106	4.35601	4.47635	2.36667	2.46408	3.12456	2.51703	1.80573	2.28014	2.36527	1.87378	2.00514	1.47647	1.45089	1.37431	1.47571	1.31101	1.13818	1.16302	1.22224	1.02124	1.1462	1.30599	1.00243	1.58714	1.59401
simsample306	-53.1	5696350	3.43126	2.4847	0.00396723	0.00396723	5.88989	5.61389	0.107524	5	3.34682	3.20214	3.54606	3.47001	3.87438	4.07687	3.63277	3.74976	3.66992	3.05731	4.03843	3.92952	3.88761	3.78889	4.05705	4.26254	2.29342	2.42781	3.06589	2.48158	1.74476	2.21499	2.31978	1.82898	1.96018	1.43609	1.42252	1.34038	1.44459	1.27306	1.09657	1.11321	1.17336	0.974856	1.09615	1.25818	0.948348	1.508	1.52057
simsample307	-51.5	5348250	3.44364	2.7197	0.00391708	0.00391708	6.0635	5.89511	0.0918783	5	3.51647	3.39762	3.71309	3.61874	4.07495	4.22743	3.82418	3.93731	3.84039	3.24876	4.24527	4.09563	4.0821	3.94841	4.25817	4.42523	2.35907	2.4722	3.12884	2.52628	1.7932	2.26964	2.36237	1.86221	1.99281	1.46364	1.44405	1.36408	1.46638	1.297	1.1197	1.13975	1.19907	0.998411	1.12127	1.27967	0.972099	1.54051	1.54886
simsample308	-51	4321960	3.33678	2.80345	0.00389786	0.00389786	5.76669	5.86176	0.0893651	5	3.45492	3.3442	3.64793	3.57121	4.03261	4.15999	3.76238	3.86327	3.76367	3.19261	4.14854	4.00203	3.99019	3.85782	4.15636	4.31219	2.31991	2.43269	3.066	2.48125	1.77216	2.23546	2.32949	1.85185	1.98095	1.46059	1.43918	1.36042	1.46212	1.29649	1.12505	1.14654	1.20589	1.00753	1.13017	1.29212	0.988557	1.56117	1.57254
simsample309	-52.3	4406640	3.35617	2.83469	0.0039053	0.0039053	6.05644	6.10413	0.105164	5	3.36987	3.22765	3.56736	3.51096	3.91745	4.10562	3.65997	3.76742	3.68552	3.08549	4.0268	3.93118	3.88804	3.79483	4.04792	4.251	2.3347	2.46793	3.08865	2.5135	1.78381	2.24775	2.35376	1.87539	2.00473	1.48014	1.46369	1.37996	1.48436	1.31259	1.13684	1.1543	1.2151	1.01453	1.13718	1.30408	0.99238	1.56178	1.57796
simsample310	-60.75	5464320	3.4183	2.59017	0.0040481	0.0040481	6.05341	5.71965	0.128672	5	3.13281	2.95507	3.33089	3.29105	3.61608	3.88304	3.3907	3.50827	3.45246	2.82748	3.7454	3.70778	3.62685	3.58259	3.77952	4.03736	2.24901	2.40855	3.00502	2.4554	1.71638	2.17166	2.29099	1.81925	1.94711	1.43248	1.42542	1.33859	1.44395	1.26907	1.09259	1.1038	1.16453	0.968091	1.08649	1.25284	0.940233	1.4841	1.50394
simsample311	-48.3	4327650	3.32903	2.79943	0.00389786	0.00389786	5.76585	5.84247	0.0919223	5	3.4604	3.34397	3.65554	3.58308	4.03915	4.1759	3.767	3.86884	3.77133	3.19211	4.15059	4.01164	3.99439	3.86778	4.1601	4.3244	2.33524	2.45258	3.08693	2.50064	1.78462	2.25058	2.34765	1.86811	1.99823	1.47381	1.45296	1.37289	1.47584	1.30821	1.13531	1.1564	1.21647	1.01645	1.14003	1.30446	0.997514	1.57447	1.58699
simsample312	-49.8	5588750	3.42546	2.48914	0.00395068	0.00395068	5.82676	5.67213	0.103091	5	3.41046	3.27266	3.61076	3.52852	3.95246	4.14046	3.70436	3.82077	3.73507	3.12348	4.11924	3.9954	3.96163	3.8511	4.13457	4.32936	2.31738	2.44735	3.09567	2.50212	1.76272	2.23789	2.34045	1.8445	1.97699	1.44818	1.43298	1.35123	1.45582	1.28407	1.10676	1.12471	1.18515	0.98499	1.10769	1.27026	0.959141	1.52616	1.53769
simsample313	-53.1	4200900	3.30201	2.79629	0.00392328	0.00392328	5.98241	5.64371	0.0964651	5	3.33857	3.21685	3.53016	3.46979	3.90019	4.04634	3.6323	3.73097	3.64051	3.06956	3.99413	3.87412	3.84789	3.73639	4.00588	4.1784	2.27431	2.39575	3.00657	2.44054	1.74023	2.19281	2.29206	1.82878	1.95583	1.44392	1.42466	1.34518	1.44658	1.28178	1.11312	1.13283	1.19201	0.996473	1.11722	1.28061	0.979062	1.54328	1.55777
simsample314	-49.4	4468870	3.3441	2.65544	0.00391788	0.00391788	5.55911	5.88085	0.0953127	5	3.41445	3.29301	3.6101	3.53601	3.98115	4.13004	3.71499	3.81962	3.72583	3.14096	4.10476	3.96981	3.94789	3.82631	4.11441	4.28555	2.30545	2.42653	3.06004	2.47627	1.75993	2.22497	2.32364	1.84414	1.97452	1.4527	1.43375	1.35394	1.45691	1.28949	1.1171	1.13735	1.19729	0.998794	1.12147	1.285	0.978933	1.55051	1.56298
simsample315	-49.35	4498080	3.36989	2.82519	0.0038768	0.0038768	5.81778	6.05261	0.0893426	5	3.52085	3.40759	3.7167	3.63407	4.10073	4.23475	3.83303	3.93812	3.83749	3.25581	4.23195	4.08246	4.07103	3.93588	4.24161	4.40101	2.36392	2.47681	3.12379	2.52708	1.80334	2.27555	2.3696	1.87998	2.01072	1.48187	1.46038	1.38038	1.48325	1.31472	1.13948	1.16094	1.22093	1.01946	1.14363	1.30621	0.998095	1.57633	1.58692
simsample316	-52.3	4392910	3.33689	2.79643	0.00390962	0.00390962	5.94026	5.84927	0.0973435	5	3.40532	3.27892	3.60065	3.5351	3.96918	4.12591	3.70358	3.80713	3.71637	3.13111	4.07884	3.95778	3.93004	3.81748	4.09266	4.27184	2.32152	2.44494	3.07082	2.49182	1.77398	2.23688	2.33728	1.86076	1.99007	1.46812	1.44917	1.36807	1.47118	1.30274	1.12968	1.14925	1.20937	1.01014	1.1328	1.29763	0.990232	1.56171	1.57572
simsample317	-51.35	4317130	3.33941	2.80484	0.00389786	0.00389786	5.76043	5.86355	0.0901017	5	3.42882	3.31729	3.62078	3.54524	4.00095	4.13059	3.73342	3.8341	3.73601	3.16721	4.11656	3.97332	3.96012	3.83041	4.12502	4.2821	2.30562	2.41851	3.04731	2.46667	1.76111	2.22148	2.31538	1.8406	1.96886	1.45171	1.43067	1.35221	1.45335	1.28851	1.11795	1.1391	1.19811	1.00096	1.12278	1.28379	0.981863	1.55041	1.56187
simsample318	-52.25	4807340	3.34892	2.76752	0.00400665	0.00400665	5.76967	5.48763	0.117856	5	3.17688	3.01784	3.37119	3.3327	3.68757	3.9107	3.44408	3.55143	3.48476	2.88468	3.78428	3.72658	3.66222	3.59994	3.81188	4.04096	2.25077	2.39684	2.98592	2.439	1.72111	2.16907	2.28181	1.82177	1.94761	1.4382	1.42636	1.34199	1.44531	1.27509	1.10309	1.11714	1.17719	0.982153	1.10083	1.26699	0.959812	1.50924	1.52893
simsample319	-56.4	4157470	3.30297	2.82857	0.00394785	0.00394785	6.01964	5.74186	0.0993732	5	3.33369	3.20578	3.52652	3.47079	3.89191	4.04936	3.62512	3.72487	3.63743	3.06017	3.98228	3.87238	3.84012	3.73604	3.99686	4.17873	2.28643	2.41189	3.02105	2.45573	1.74987	2.20346	2.30524	1.84112	1.96839	1.45426	1.43571	1.35497	1.45712	1.29069	1.12074	1.13976	1.19939	1.00279	1.12391	1.28888	0.98489	1.55036	1.56598
simsample320	-51.95	4863160	3.35671	2.76856	0.00400665	0.00400665	5.85129	5.48339	0.113105	5	3.22298	3.07118	3.41712	3.37102	3.74224	3.95161	3.49641	3.60358	3.53189	2.93552	3.8463	3.77417	3.71823	3.64461	3.87113	4.08899	2.2621	2.40228	2.99981	2.44594	1.72874	2.17964	2.2889	1.82474	1.95105	1.43992	1.42663	1.34327	1.44619	1.27673	1.1046	1.11978	1.17962	0.984139	1.10332	1.26816	0.961769	1.51387	1.53186
simsample321	-52.85	4416280	3.35968	2.8061	0.00393909	0.00393909	5.79096	6.11883	0.106089	5	3.34449	3.20153	3.54124	3.48506	3.8868	4.07736	3.6319	3.73951	3.65897	3.06018	3.99801	3.90434	3.86004	3.7688	4.01926	4.22345	2.31865	2.45234	3.06996	2.49803	1.77121	2.23292	2.33895	1.86269	1.9915	1.46969	1.45376	1.37039	1.47437	1.30331	1.12836	1.14551	1.20604	1.00662	1.12854	1.29458	0.98432	1.55004	1.5662
simsample322	-51.95	5638010	3.42324	2.49136	0.00397219	0.00397219	5.88722	5.62005	0.109308	5	3.34506	3.1967	3.54541	3.47317	3.87319	4.08164	3.63016	3.7473	3.66899	3.05208	4.03196	3.92903	3.88324	3.78899	4.05172	4.26284	2.3013	2.43889	3.0761	2.49206	1.75164	2.22284	2.32978	1.83882	1.97055	1.4444	1.43125	1.34824	1.45323	1.28052	1.10326	1.11962	1.18024	0.980788	1.10263	1.26638	0.954488	1.51676	1.53029
simsample323	-51.1	4410330	3.33306	2.74301	0.00390276	0.00390276	5.88053	5.83997	0.0977596	5	3.41156	3.28442	3.60804	3.54175	3.97773	4.13549	3.71039	3.81455	3.72355	3.13476	4.08914	3.96657	3.93843	3.82526	4.10213	4.28219	2.32315	2.44797	3.07691	2.49555	1.77512	2.24002	2.34133	1.86309	1.99332	1.4694	1.45068	1.3694	1.47309	1.30408	1.13061	1.15028	1.21071	1.01091	1.13408	1.2998	0.991204	1.56518	1.57926
simsample324	-51.55	5030560	3.39352	2.61985	0.0038684	0.0038684	6.14292	5.80432	0.0894816	5	3.54695	3.43378	3.74571	3.65186	4.12726	4.26403	3.86121	3.97098	3.86872	3.2766	4.28431	4.12211	4.11341	3.971	4.29074	4.44887	2.36148	2.47542	3.13759	2.53013	1.79801	2.27766	2.37182	1.87255	2.0058	1.47226	1.45169	1.37205	1.4759	1.30634	1.1297	1.15138	1.21172	1.00949	1.13444	1.29671	0.986807	1.56766	1.57667
simsample325	-52	5063500	3.39846	2.59824	0.0038596	0.0038596	6.25913	5.95776	0.0980507	5	3.51385	3.38261	3.71643	3.63332	4.08163	4.2523	3.82004	3.93393	3.8409	3.22887	4.23561	4.09992	4.07367	3.95196	4.24867	4.43373	2.37651	2.50289	3.1623	2.55678	1.80993	2.29269	2.39431	1.89222	2.0267	1.48794	1.47009	1.38747	1.49352	1.3198	1.14014	1.15983	1.22135	1.01693	1.14263	1.30873	0.992742	1.57555	1.5872
simsample326	-51.6	4558040	3.34722	2.74549	0.00393107	0.00393107	5.79165	5.82452	0.10627	5	3.33346	3.19109	3.53042	3.47456	3.87755	4.06625	3.62027	3.72725	3.64645	3.04782	3.98684	3.89149	3.84733	3.75548	4.00655	4.20967	2.30717	2.44168	3.05869	2.4876	1.76279	2.22388	2.3305	1.85589	1.98508	1.46394	1.44817	1.3651	1.46923	1.29857	1.12441	1.14173	1.20233	1.00334	1.12529	1.29184	0.981933	1.54832	1.56467
simsample327	-47.3	4344220	3.34752	2.80452	0.00387445	0.00387445	5.631	5.98686	0.0826899	5	3.5663	3.46713	3.76092	3.67113	4.16476	4.27041	3.88758	3.98897	3.87988	3.30984	4.29354	4.12119	4.12334	3.97065	4.29652	4.43507	2.36343	2.46886	3.12204	2.52025	1.80404	2.27711	2.36707	1.87788	2.00922	1.48026	1.4565	1.37828	1.48061	1.31414	1.14052	1.16393	1.22367	1.02234	1.14717	1.30912	1.00315	1.58652	1.59551
simsample328	-49.45	5328370	3.42674	2.71101	0.0039193	0.0039193	6.05665	5.80234	0.0959577	5	3.4969	3.36984	3.6955	3.6095	4.05427	4.22016	3.80136	3.91474	3.82176	3.22155	4.21383	4.07763	4.05527	3.93199	4.22891	4.40826	2.36477	2.48482	3.13793	2.53783	1.79945	2.27658	2.37379	1.87484	2.00633	1.47454	1.45607	1.3746	1.47831	1.30698	1.1287	1.14809	1.20825	1.0063	1.12992	1.2915	0.980545	1.55266	1.56296
simsample329	-52.6	4773150	3.35398	2.81738	0.00403247	0.00403247	5.7978	5.56239	0.118516	5	3.17808	3.01733	3.37236	3.33547	3.6869	3.91347	3.44485	3.55248	3.48679	2.88587	3.78235	3.72856	3.66254	3.60277	3.8115	4.04334	2.25849	2.40518	2.99309	2.44679	1.72721	2.17517	2.28826	1.82793	1.95347	1.44362	1.43186	1.34702	1.45038	1.27965	1.10707	1.12083	1.18092	0.985511	1.10418	1.27045	0.962673	1.51174	1.5317
simsample330	-48.55	4432630	3.33177	2.63527	0.00388998	0.00388998	5.64274	5.92449	0.0970073	5	3.45468	3.32835	3.65415	3.58257	4.03018	4.1859	3.75813	3.86416	3.77047	3.17352	4.15029	4.01824	3.99251	3.87312	4.16053	4.3388	2.33915	2.46511	3.1063	2.51508	1.78652	2.25854	2.36072	1.87518	2.00794	1.4774	1.45862	1.37707	1.48218	1.31158	1.1365	1.15681	1.21799	1.01615	1.14096	1.30845	0.996549	1.5784	1.59193
simsample331	-49	4370140	3.35028	2.77151	0.00387021	0.00387021	5.65298	5.9726	0.084657	5	3.52668	3.42437	3.72064	3.63294	4.11672	4.22916	3.84316	3.94496	3.8388	3.26853	4.24614	4.07994	4.07842	3.93103	4.25013	4.3932	2.34292	2.45022	3.09805	2.50137	1.78807	2.25799	2.34879	1.8628	1.99343	1.46797	1.44514	1.36709	1.46903	1.30317	1.13047	1.15326	1.21273	1.01281	1.1367	1.29796	0.993414	1.57197	1.58132
simsample332	-47.55	4425930	3.33199	2.6434	0.00388998	0.00388998	5.62356	5.91713	0.0921836	5	3.5053	3.38783	3.70447	3.62567	4.09255	4.23117	3.81616	3.92116	3.82152	3.22989	4.21712	4.06879	4.05267	3.92048	4.2238	4.38877	2.35212	2.47223	3.12157	2.52347	1.7961	2.27104	2.36987	1.88088	2.01422	1.48164	1.46121	1.38061	1.48545	1.31558	1.14048	1.16207	1.22313	1.02063	1.14614	1.31281	1.00147	1.58732	1.59931
simsample333	-52.1	4367430	3.33974	2.72266	0.00392706	0.00392706	5.76066	6.00627	0.102423	5	3.37308	3.23745	3.57031	3.50915	3.9283	4.10312	3.66572	3.77171	3.68606	3.09044	4.03963	3.93092	3.89408	3.792	4.05589	4.24866	2.31558	2.44607	3.07006	2.49307	1.76914	2.2329	2.33736	1.86021	1.99026	1.46699	1.44992	1.36762	1.47178	1.30165	1.12763	1.14608	1.20673	1.00712	1.12985	1.29635	0.986555	1.55749	1.57278
simsample334	-56.2	4482880	3.33655	2.64949	0.0039914	0.0039914	5.71151	5.85647	0.113589	5	3.2374	3.08486	3.43409	3.38747	3.76467	3.97361	3.51246	3.62	3.54718	2.94419	3.86816	3.79198	3.73565	3.66007	3.89048	4.10902	2.26484	2.40804	3.01142	2.45274	1.73112	2.18595	2.29742	1.83077	1.95917	1.44373	1.43067	1.34698	1.45127	1.28071	1.1081	1.1237	1.18429	0.987554	1.10803	1.27542	0.966399	1.52531	1.54374
simsample335	-47.15	4975260	3.38486	2.62328	0.0038431	0.0038431	5.98734	5.8411	0.0880263	5	3.60305	3.49151	3.80412	3.70834	4.19595	4.32777	3.9235	4.03349	3.92799	3.33099	4.35216	4.18334	4.17735	4.02951	4.35719	4.51279	2.3929	2.50681	3.17828	2.5622	1.82251	2.30837	2.40302	1.89791	2.03303	1.49248	1.47107	1.39073	1.49586	1.32453	1.14602	1.16845	1.22957	1.02466	1.15147	1.31599	1.00241	1.59251	1.60146
simsample336	-56.15	4512010	3.35365	2.76068	0.00398532	0.00398532	5.76542	6.02784	0.121769	5	3.20084	3.03274	3.39892	3.36418	3.71199	3.95202	3.46804	3.57845	3.5148	2.89972	3.80948	3.76185	3.68961	3.63505	3.84015	4.08299	2.28434	2.43772	3.03252	2.48008	1.74699	2.20165	2.319	1.85215	1.97998	1.46227	1.45158	1.36484	1.47035	1.29621	1.12074	1.13402	1.19529	0.996963	1.11734	1.28708	0.973539	1.53007	1.55114
simsample337	-52.45	4770620	3.34733	2.76375	0.00401374	0.00401374	5.74957	5.49515	0.117026	5	3.17376	3.01657	3.36746	3.32808	3.68486	3.90448	3.44116	3.54794	3.48055	2.88313	3.78155	3.72147	3.65877	3.59471	3.8084	4.03466	2.24468	2.38937	2.97776	2.43156	1.71641	2.1633	2.2752	1.81628	1.94183	1.43379	1.42172	1.33781	1.44075	1.27125	1.09989	1.11412	1.17397	0.9795	1.09792	1.26347	0.957414	1.50582	1.52523
simsample338	-53.6	4752530	3.35203	2.81678	0.00402651	0.00402651	5.82036	5.51711	0.118119	5	3.15351	2.99482	3.3461	3.30925	3.65908	3.8822	3.41844	3.52493	3.45935	2.86411	3.75327	3.69883	3.63405	3.57392	3.78184	4.01064	2.23933	2.38434	2.9675	2.42559	1.71261	2.15675	2.26867	1.81236	1.93685	1.43134	1.41954	1.33552	1.43797	1.26881	1.09781	1.11157	1.17114	0.977403	1.0951	1.25996	0.954923	1.49965	1.51939
simsample339	-57.35	4864200	3.361	2.82064	0.00403627	0.00403627	5.92166	5.52047	0.123798	5	3.11634	2.94832	3.30974	3.27918	3.61055	3.85289	3.37526	3.48371	3.42403	2.8213	3.70378	3.66537	3.59081	3.54325	3.73636	3.97967	2.23758	2.38954	2.96728	2.43006	1.71159	2.15506	2.27086	1.81521	1.93956	1.43384	1.42393	1.3384	1.44157	1.27065	1.09852	1.11082	1.17073	0.976703	1.09408	1.26015	0.953029	1.49512	1.51634
simsample340	-50.8	4358600	3.33514	2.74264	0.00391017	0.00391017	5.84044	5.89881	0.0938332	5	3.44026	3.32063	3.63585	3.56354	4.01344	4.15723	3.74392	3.8471	3.75167	3.16895	4.12924	3.99375	3.97347	3.85027	4.1393	4.30809	2.3248	2.44442	3.07814	2.49302	1.7759	2.24168	2.33987	1.86021	1.99049	1.46675	1.44682	1.36665	1.46974	1.30192	1.12901	1.14964	1.20974	1.01016	1.13344	1.29779	0.990774	1.56576	1.57846
simsample341	-51.45	4895100	3.39373	2.78405	0.00394941	0.00394941	5.88531	5.91309	0.108518	5	3.33988	3.19177	3.53736	3.47866	3.87168	4.07538	3.62483	3.73624	3.65871	3.05314	3.99731	3.9087	3.86058	3.77363	4.02131	4.23319	2.32289	2.4587	3.07968	2.50586	1.77236	2.23646	2.34314	1.86189	1.99083	1.46777	1.45304	1.36908	1.47323	1.30096	1.12438	1.14064	1.20113	1.00141	1.123	1.28796	0.976646	1.53898	1.55465
simsample342	-57.6	5406660	3.40065	2.60524	0.00401487	0.00401487	6.1643	5.69537	0.131471	5	3.16057	2.97581	3.36226	3.32861	3.6505	3.92836	3.41969	3.53815	3.48395	2.84684	3.77078	3.74188	3.65435	3.61643	3.80675	4.0753	2.28344	2.44984	3.04975	2.49569	1.74418	2.20503	2.32914	1.85336	1.98324	1.46043	1.45395	1.3648	1.47246	1.294	1.11472	1.12558	1.1877	0.987865	1.10833	1.27938	0.960387	1.51406	1.53589
simsample343	-52.3	4949280	3.40672	2.76798	0.00393502	0.00393502	5.92528	5.85752	0.0949426	5	3.42978	3.30721	3.62385	3.54317	3.98183	4.13852	3.72953	3.8381	3.74584	3.16166	4.12606	3.99307	3.97205	3.85083	4.1403	4.31343	2.32091	2.43782	3.07429	2.48832	1.76791	2.2338	2.32906	1.84344	1.97204	1.45135	1.43254	1.35269	1.45431	1.28677	1.11266	1.13206	1.19113	0.993048	1.11448	1.27378	0.969144	1.53214	1.54288
simsample344	-52	4425790	3.3413	2.70781	0.00388719	0.00388719	5.92768	5.92883	0.093511	5	3.46635	3.3467	3.6634	3.58803	4.04299	4.18706	3.77246	3.87703	3.78044	3.19323	4.16485	4.0253	4.00608	3.88007	4.17422	4.34279	2.33739	2.45731	3.09768	2.5071	1.78478	2.25451	2.35291	1.86864	2.00006	1.47269	1.45272	1.37228	1.47603	1.30721	1.13312	1.15397	1.21442	1.01365	1.13772	1.3027	0.993848	1.57236	1.58469
simsample345	-54.05	4280380	3.31557	2.81018	0.00395162	0.00395162	5.99841	5.94714	0.121002	5	3.2237	3.05605	3.42304	3.3939	3.74699	3.98163	3.49344	3.60117	3.53589	2.92027	3.82719	3.78051	3.70807	3.65343	3.85718	4.09933	2.30323	2.45786	3.05132	2.49795	1.76375	2.2192	2.33824	1.87341	2.00187	1.4808	1.46914	1.38157	1.48798	1.31296	1.13735	1.15113	1.21307	1.01316	1.13482	1.30783	0.99192	1.5561	1.57861
simsample346	-50.55	4413520	3.33902	2.70637	0.00388312	0.00388312	5.9912	5.99758	0.0940535	5	3.50296	3.38088	3.70251	3.62736	4.08591	4.23338	3.81204	3.91785	3.8207	3.22572	4.2078	4.06845	4.04786	3.9218	4.2176	4.3897	2.36458	2.48675	3.13388	2.53693	1.80574	2.28086	2.38096	1.89137	2.02437	1.4907	1.47065	1.38909	1.4942	1.32321	1.14703	1.16802	1.22925	1.02605	1.15162	1.31887	1.0061	1.59157	1.6043
simsample347	-54.1	4426820	3.33827	2.65771	0.00394847	0.00394847	5.79639	5.96764	0.106095	5	3.33817	3.19662	3.53623	3.47849	3.8863	4.07286	3.62593	3.73315	3.65126	3.05013	3.99785	3.89775	3.85463	3.76007	4.01539	4.21694	2.30219	2.43759	3.05831	2.48458	1.75885	2.22175	2.32901	1.85318	1.98349	1.46087	1.44523	1.36237	1.46704	1.29626	1.12223	1.13988	1.20075	1.00153	1.12398	1.29135	0.980789	1.54996	1.56618
simsample348	-56.05	4756940	3.35866	2.84162	0.00404514	0.00404514	5.81434	5.66599	0.128875	5	3.09011	2.91362	3.28468	3.26151	3.57753	3.83619	3.34443	3.45396	3.3992	2.78925	3.66501	3.64162	3.55799	3.52197	3.70111	3.95766	2.24271	2.40163	2.97419	2.44087	1.71655	2.15983	2.27981	1.82513	1.9496	1.44246	1.43404	1.3468	1.45097	1.27804	1.10469	1.11576	1.17623	0.981356	1.09887	1.26709	0.957156	1.49926	1.5223
simsample349	-43.6	4594040	3.35731	2.74804	0.0038218	0.0038218	5.67106	5.90253	0.0811148	5	3.65746	3.55977	3.85629	3.75854	4.27048	4.373	3.98782	4.09224	3.97856	3.39708	4.41194	4.2267	4.23328	4.07095	4.41284	4.5487	2.41055	2.51601	3.18859	2.57014	1.83863	2.32359	2.41392	1.91147	2.0461	1.50547	1.48101	1.40182	1.50616	1.3366	1.15932	1.18364	1.24451	1.03908	1.16662	1.33098	1.01914	1.61498	1.62307
simsample350	-49.85	4326130	3.30227	2.68236	0.00394142	0.00394142	5.57996	5.70982	0.107762	5	3.30525	3.16179	3.50282	3.45372	3.85487	4.04191	3.58975	3.69398	3.61389	3.01537	3.94802	3.85624	3.80923	3.72078	3.96601	4.17071	2.29119	2.42947	3.04032	2.47386	1.75304	2.2115	2.32098	1.85265	1.9823	1.46203	1.44645	1.36319	1.46797	1.29755	1.12497	1.14238	1.20339	1.00474	1.127	1.29626	0.985994	1.55553	1.57347
simsample351	-52.8	4401060	3.33969	2.7495	0.00391017	0.00391017	5.84451	5.89574	0.0931057	5	3.45696	3.33826	3.65289	3.57882	4.03223	4.17444	3.7624	3.86597	3.76953	3.18616	4.15055	4.01239	3.99354	3.86815	4.16037	4.32776	2.33313	2.45191	3.08865	2.50091	1.78193	2.24935	2.34706	1.86527	1.99586	1.47063	1.45044	1.37021	1.47343	1.3053	1.13186	1.15267	1.21284	1.01272	1.13632	1.30067	0.993076	1.56947	1.58186
simsample352	-54.95	4193740	3.31886	2.79013	0.00391545	0.00391545	6.01263	5.9717	0.0996186	5	3.39098	3.26043	3.5873	3.52742	3.95531	4.11805	3.68707	3.7901	3.70143	3.11241	4.05596	3.94248	3.90992	3.80324	4.07076	4.2562	2.32249	2.44991	3.07235	2.49567	1.77612	2.23862	2.34172	1.86725	1.99692	1.47391	1.45546	1.37353	1.47737	1.30803	1.13482	1.15404	1.2146	1.01483	1.13786	1.30476	0.995714	1.56938	1.58469
simsample353	-51.2	4397080	3.32744	2.76398	0.00391036	0.00391036	5.96187	5.83923	0.0990983	5	3.42438	3.29376	3.62237	3.5591	3.99286	4.15599	3.72359	3.82822	3.73818	3.14404	4.1001	3.98234	3.951	3.84117	4.11441	4.29973	2.34015	2.46772	3.09795	2.51475	1.78879	2.25603	2.35927	1.8792	2.01014	1.48268	1.46411	1.38179	1.48639	1.3158	1.14105	1.16053	1.22151	1.02019	1.1442	1.31182	1.00051	1.57843	1.59331
simsample354	-53.55	4854940	3.40016	2.91125	0.00401591	0.00401591	5.72758	5.8263	0.1109	5	3.23992	3.09058	3.43178	3.38068	3.75141	3.95961	3.51463	3.62326	3.55116	2.96029	3.86711	3.79349	3.74108	3.66493	3.89469	4.10926	2.27423	2.40872	3.00726	2.4527	1.73613	2.18635	2.29157	1.82443	1.94889	1.43985	1.4259	1.34298	1.44437	1.27563	1.10279	1.11773	1.17665	0.981741	1.09981	1.26082	0.9567	1.50216	1.51845
simsample355	-52.1	4744410	3.37986	2.81512	0.0039701	0.0039701	5.77284	5.752	0.0998692	5	3.33891	3.20908	3.53101	3.46424	3.87935	4.04802	3.62873	3.73446	3.64885	3.06806	4.00221	3.89031	3.85887	3.75368	4.01963	4.2041	2.28667	2.40923	3.02596	2.45622	1.74474	2.201	2.29972	1.82682	1.95338	1.44031	1.42288	1.34259	1.4437	1.27717	1.10545	1.12361	1.18246	0.986706	1.10656	1.26675	0.964203	1.52036	1.53363
simsample356	-50	4356090	3.33386	2.79486	0.00389786	0.00389786	5.78316	5.83857	0.091819	5	3.45276	3.33679	3.64735	3.57404	4.02916	4.16575	3.75863	3.86058	3.76325	3.18543	4.14275	4.00339	3.98656	3.85974	4.15224	4.31582	2.32891	2.44559	3.07907	2.4938	1.77938	2.24438	2.3409	1.86195	1.99172	1.46873	1.44797	1.36819	1.47079	1.30364	1.1311	1.15213	1.21199	1.01255	1.13574	1.29941	0.993401	1.56834	1.58063
simsample357	-60.9	5470930	3.41636	2.4977	0.0040362	0.0040362	6.04694	5.77314	0.127866	5	3.15117	2.97457	3.35084	3.30689	3.63928	3.90395	3.41123	3.52987	3.47231	2.84328	3.77531	3.73049	3.65157	3.60279	3.80706	4.06271	2.24987	2.4096	3.01326	2.45816	1.71615	2.17501	2.29454	1.81912	1.94846	1.43101	1.42397	1.33738	1.44339	1.26813	1.09127	1.10297	1.16402	0.966956	1.0861	1.25308	0.939396	1.48694	1.50627
simsample358	-55.15	4360640	3.33365	2.81963	0.00396448	0.00396448	5.92375	5.92651	0.115709	5	3.23638	3.07858	3.43291	3.39471	3.76092	3.97862	3.50978	3.61658	3.54675	2.94259	3.85135	3.78937	3.72718	3.66066	3.87833	4.10543	2.28852	2.43426	3.03065	2.47597	1.75099	2.20441	2.31769	1.853	1.98032	1.46384	1.45078	1.36547	1.47001	1.29797	1.12411	1.13892	1.19977	1.00184	1.12245	1.29128	0.980271	1.53955	1.55958
simsample359	-48.95	4461360	3.38407	2.75258	0.00384948	0.00384948	5.73587	6.26888	0.0767953	5	3.66425	3.57626	3.85994	3.75192	4.27425	4.36243	3.9969	4.1012	3.98363	3.41399	4.43084	4.23064	4.24731	4.07362	4.42929	4.55083	2.39354	2.49085	3.16534	2.54633	1.82299	2.30549	2.39031	1.88769	2.02078	1.48541	1.46008	1.38289	1.48522	1.31845	1.14276	1.16761	1.22728	1.02421	1.1503	1.31006	1.00327	1.59172	1.59746
simsample360	-53.5	4771900	3.34629	2.74513	0.00400665	0.00400665	5.78735	5.47555	0.11537	5	3.18151	3.02737	3.37488	3.33292	3.69532	3.90906	3.45048	3.55682	3.48767	2.89267	3.79391	3.72826	3.66873	3.60052	3.81927	4.04079	2.24137	2.38393	2.97415	2.42664	1.71359	2.16057	2.27119	1.81208	1.9377	1.43013	1.4176	1.33429	1.43696	1.26815	1.09728	1.11195	1.17163	0.977479	1.09588	1.26082	0.955692	1.50429	1.52312
simsample361	-54.8	4838130	3.36041	2.80014	0.00403627	0.00403627	5.86221	5.49251	0.115395	5	3.17544	3.0211	3.36775	3.3256	3.68447	3.89988	3.44353	3.55019	3.48186	2.88903	3.78528	3.7219	3.66218	3.59524	3.81209	4.03413	2.24121	2.38259	2.97076	2.42506	1.71309	2.15869	2.26834	1.8096	1.9343	1.42846	1.41595	1.33272	1.43479	1.26631	1.09542	1.1098	1.16914	0.975483	1.09327	1.2569	0.952807	1.49797	1.51651
simsample362	-52.3	4478390	3.33887	2.70753	0.00392607	0.00392607	5.87767	5.94086	0.11031	5	3.32695	3.17668	3.5265	3.47594	3.86973	4.07242	3.61122	3.71974	3.64235	3.03306	3.97526	3.89027	3.83836	3.75488	3.99696	4.2119	2.31786	2.45923	3.07654	2.50477	1.77163	2.23547	2.34643	1.87004	2.00051	1.47518	1.46062	1.37593	1.48163	1.30856	1.13281	1.14939	1.21087	1.01024	1.13313	1.30269	0.988795	1.55926	1.57717
simsample363	-48.9	4343160	3.34124	2.8144	0.00389185	0.00389185	5.63922	5.85097	0.0855227	5	3.48992	3.38653	3.68223	3.59934	4.07498	4.18895	3.80271	3.90286	3.79875	3.23312	4.19581	4.03651	4.03249	3.89006	4.20099	4.34597	2.32677	2.4345	3.0734	2.48406	1.77684	2.24172	2.33275	1.85278	1.98204	1.46103	1.4384	1.36054	1.46177	1.29699	1.12572	1.14813	1.20723	1.00874	1.13164	1.29239	0.989882	1.56411	1.57413
simsample364	-47	4479510	3.36029	2.79928	0.00385597	0.00385597	5.67684	5.97831	0.0815766	5	3.60728	3.50946	3.80318	3.70866	4.2101	4.31395	3.93251	4.03549	3.92428	3.35074	4.34714	4.16854	4.1735	4.01592	4.34962	4.48603	2.38411	2.48831	3.14988	2.54092	1.81863	2.29646	2.38572	1.89041	2.02276	1.4895	1.46535	1.38687	1.48972	1.32218	1.14697	1.17073	1.23075	1.02793	1.15365	1.31578	1.00793	1.59502	1.6033
simsample365	-52.3	4227400	3.31512	2.79701	0.00390596	0.00390596	6.02149	5.76242	0.0864192	5	3.47506	3.37049	3.66776	3.58977	4.06372	4.17744	3.78682	3.88528	3.78182	3.2159	4.17357	4.01776	4.01146	3.87188	4.17819	4.32499	2.32111	2.43129	3.06646	2.47993	1.77448	2.23802	2.33087	1.85447	1.984	1.46309	1.44051	1.36239	1.46408	1.29921	1.12863	1.15109	1.21047	1.01189	1.13506	1.29755	0.994509	1.57104	1.58204
simsample366	-56.8	4446300	3.37096	2.79728	0.00390179	0.00390179	6.00632	6.13028	0.0965888	5	3.41977	3.29413	3.61478	3.54289	3.97802	4.13659	3.7188	3.82491	3.7338	3.1478	4.10315	3.97817	3.95264	3.83712	4.11772	4.29563	2.32606	2.44699	3.07802	2.49543	1.77493	2.23975	2.33811	1.85676	1.98585	1.46373	1.44492	1.36414	1.46674	1.29832	1.12436	1.14378	1.20353	1.00447	1.12673	1.2893	0.982541	1.55074	1.5634
simsample367	-51.4	4427100	3.33661	2.75587	0.00389997	0.00389997	5.96594	5.79255	0.0913029	5	3.45796	3.34319	3.65279	3.57701	4.03537	4.17013	3.76465	3.86704	3.76885	3.19061	4.15316	4.00996	3.99466	3.86533	4.16157	4.32317	2.32645	2.4426	3.0787	2.49165	1.77696	2.24295	2.33907	1.85884	1.98899	1.46561	1.44487	1.36536	1.46801	1.30098	1.12846	1.14967	1.20953	1.01013	1.13341	1.29683	0.990926	1.56626	1.57813
simsample368	-53.55	4602330	3.3739	2.78953	0.00395106	0.00395106	5.82302	6.01023	0.105719	5	3.33954	3.19753	3.53563	3.47644	3.87799	4.06844	3.62645	3.73491	3.65436	3.05689	3.99636	3.90048	3.85747	3.76481	4.01753	4.22022	2.3114	2.44367	3.06215	2.49018	1.76456	2.22585	2.3307	1.85367	1.98213	1.46184	1.44606	1.36317	1.46664	1.29617	1.12146	1.13853	1.19872	1.00004	1.12142	1.28595	0.97698	1.53963	1.55506
simsample369	-49.75	4342380	3.32805	2.79764	0.00389786	0.00389786	5.78393	5.83231	0.0963856	5	3.41796	3.29326	3.61357	3.54787	3.98673	4.13921	3.71812	3.82092	3.72875	3.14414	4.09363	3.96964	3.94353	3.82861	4.10647	4.28313	2.32648	2.44932	3.07662	2.49615	1.77832	2.24203	2.34229	1.86556	1.99523	1.47214	1.45275	1.37168	1.47498	1.30649	1.13343	1.15336	1.21362	1.01394	1.13702	1.30245	0.994625	1.56861	1.58261
simsample370	-52.7	4391980	3.34022	2.69523	0.00388312	0.00388312	5.96203	5.93819	0.0913968	5	3.47234	3.35727	3.6685	3.58995	4.05192	4.18755	3.78035	3.88405	3.78516	3.20263	4.17575	4.02892	4.01416	3.8827	4.18315	4.34486	2.33078	2.44775	3.08927	2.49807	1.77953	2.24862	2.3452	1.8615	1.99274	1.46677	1.44623	1.36662	1.46985	1.30213	1.12888	1.15023	1.21038	1.01026	1.13412	1.29807	0.990838	1.56873	1.5803
simsample371	-57.85	5261570	3.42425	2.68389	0.00395988	0.00395988	6.08834	5.78889	0.105331	5	3.33243	3.1917	3.52775	3.45725	3.85846	4.05229	3.61784	3.73067	3.65047	3.05209	4.00573	3.90202	3.86219	3.76498	4.02661	4.227	2.29304	2.42243	3.04799	2.47257	1.74626	2.20901	2.31098	1.82827	1.95643	1.43848	1.42354	1.34187	1.44428	1.27479	1.09998	1.11667	1.17599	0.978978	1.09902	1.25927	0.953033	1.50739	1.52032
simsample372	-61.65	5382910	3.42202	2.48788	0.00403049	0.00403049	5.95235	5.95232	0.12823	5	3.15508	2.97754	3.35518	3.31049	3.64235	3.90931	3.41524	3.53473	3.4775	2.84638	3.78152	3.73697	3.65748	3.60903	3.8136	4.07069	2.25318	2.41353	3.01902	2.4626	1.71837	2.17846	2.29828	1.82118	1.95082	1.43233	1.42549	1.33871	1.44493	1.26921	1.09184	1.10343	1.16456	0.967161	1.08643	1.25346	0.93915	1.48699	1.50619
simsample373	-53.2	4839510	3.38324	2.79025	0.00395354	0.00395354	6.08624	5.87226	0.109966	5	3.32463	3.17423	3.52226	3.46744	3.85561	4.06276	3.60776	3.71853	3.64247	3.036	3.97486	3.8915	3.84041	3.75747	3.99953	4.21497	2.31985	2.45789	3.07516	2.50414	1.77098	2.23381	2.34197	1.86305	1.99191	1.46928	1.45489	1.37053	1.47494	1.3024	1.12603	1.14202	1.20268	1.00298	1.12458	1.29053	0.978738	1.54134	1.55787
simsample374	-57.95	5256920	3.41627	2.71596	0.00398115	0.00398115	6.15353	5.79437	0.117298	5	3.24483	3.08315	3.44207	3.39071	3.75127	3.98472	3.51696	3.6318	3.56451	2.95083	3.88232	3.81726	3.75452	3.68707	3.91176	4.14455	2.28917	2.43455	3.04434	2.4817	1.7461	2.20576	2.31724	1.83975	1.96767	1.44937	1.43808	1.35298	1.45725	1.28407	1.10749	1.12132	1.18164	0.983768	1.1035	1.26799	0.956875	1.50846	1.52558
simsample375	-52.85	4578900	3.36837	2.7625	0.003918	0.003918	5.8924	5.97384	0.0981531	5	3.41576	3.28713	3.61188	3.54138	3.97335	4.13732	3.71373	3.82063	3.7308	3.14025	4.09847	3.97665	3.94829	3.83559	4.11346	4.29572	2.32747	2.45107	3.08286	2.49971	1.7761	2.24216	2.34216	1.8599	1.98963	1.46596	1.4477	1.36642	1.46963	1.30038	1.12588	1.14506	1.20514	1.00555	1.12815	1.29178	0.983607	1.55329	1.56643
simsample376	-49.85	5112430	3.42184	2.62831	0.00387512	0.00387512	5.9454	5.93644	0.0799431	5	3.63752	3.54338	3.83425	3.72065	4.23158	4.3358	3.9644	4.07395	3.96033	3.38172	4.41165	4.21432	4.2268	4.05718	4.41172	4.54143	2.3763	2.47628	3.15448	2.53406	1.80584	2.28984	2.37533	1.86815	2.00138	1.46695	1.44352	1.36634	1.46854	1.30135	1.125	1.1487	1.20808	1.00611	1.13121	1.28901	0.982634	1.56426	1.56922
simsample377	-51.45	4262790	3.30311	2.79774	0.00392328	0.00392328	6.03602	5.73635	0.102369	5	3.36886	3.23339	3.56585	3.51242	3.93121	4.10176	3.66166	3.76422	3.67843	3.0861	4.02256	3.91883	3.88055	3.78131	4.03904	4.23197	2.32127	2.45291	3.07012	2.49721	1.7765	2.23767	2.34354	1.87193	2.00157	1.4784	1.46059	1.37776	1.48217	1.31202	1.13878	1.15743	1.21833	1.0183	1.14142	1.31015	0.999794	1.57417	1.59092
simsample378	-57.8	4365820	3.3391	2.81944	0.00396448	0.00396448	5.93658	5.92217	0.114682	5	3.21947	3.06453	3.41426	3.37421	3.74068	3.95403	3.49191	3.59805	3.52779	2.92938	3.83346	3.76874	3.70897	3.64046	3.85974	4.08256	2.27174	2.41483	3.00844	2.4567	1.73772	2.18812	2.29953	1.83742	1.96375	1.45128	1.43806	1.35372	1.45724	1.28681	1.1143	1.1292	1.18946	0.993131	1.11277	1.27966	0.971508	1.52625	1.54561
simsample379	-50.05	4633070	3.36646	2.77289	0.00391638	0.00391638	5.88854	5.94021	0.0958837	5	3.47955	3.35349	3.67781	3.60362	4.0495	4.20727	3.78444	3.89192	3.79826	3.20345	4.17688	4.04649	4.02215	3.9024	4.19048	4.36877	2.36155	2.48387	3.12642	2.53345	1.80208	2.27479	2.37447	1.88525	2.01673	1.48597	1.46667	1.38484	1.48914	1.31824	1.14173	1.16174	1.22248	1.02022	1.14461	1.30991	0.998343	1.57677	1.58945
simsample380	-53.05	4815650	3.34875	2.75342	0.00400665	0.00400665	5.76297	5.4735	0.119076	5	3.15663	2.99627	3.35054	3.31341	3.66352	3.88963	3.42156	3.52891	3.46363	2.86389	3.75968	3.70508	3.63894	3.57931	3.78771	4.01886	2.24057	2.38774	2.97378	2.42969	1.71336	2.15963	2.27291	1.81474	1.94023	1.43257	1.4212	1.33687	1.44002	1.27008	1.09856	1.11229	1.17223	0.977875	1.0961	1.26203	0.955514	1.50268	1.52263
simsample381	-56.5	4387610	3.33162	2.81208	0.00396448	0.00396448	5.97191	5.87921	0.117423	5	3.2196	3.05922	3.41624	3.38045	3.74089	3.96363	3.49073	3.59771	3.52968	2.924	3.82945	3.77234	3.70719	3.64458	3.85734	4.08842	2.28373	2.43161	3.02525	2.47289	1.74757	2.20004	2.31457	1.85118	1.97837	1.4625	1.45001	1.36436	1.46905	1.29674	1.12293	1.13733	1.19826	1.00052	1.12093	1.29019	0.978916	1.53715	1.55775
simsample382	-53.2	4949640	3.39843	2.83138	0.0039877	0.0039877	5.82649	5.69858	0.103303	5	3.30569	3.16968	3.49749	3.4335	3.83371	4.01618	3.5902	3.69782	3.61675	3.03262	3.96025	3.85956	3.82191	3.7254	3.98116	4.17508	2.27962	2.40524	3.01736	2.4519	1.73865	2.19314	2.29324	1.821	1.94671	1.43554	1.41937	1.33848	1.4394	1.27238	1.10025	1.11726	1.17593	0.980813	1.09977	1.25922	0.956803	1.50751	1.52123
simsample383	-55.85	5260760	3.41244	2.67459	0.00398355	0.00398355	6.05835	5.82308	0.119028	5	3.24998	3.0848	3.44901	3.39901	3.75758	3.99729	3.52192	3.63787	3.57165	2.95137	3.88887	3.82672	3.76081	3.69603	3.91864	4.15664	2.29703	2.44593	3.05842	2.49349	1.75228	2.21472	2.32844	1.84859	1.97766	1.45606	1.44537	1.35947	1.46478	1.29013	1.11246	1.12608	1.18697	0.987919	1.10842	1.27467	0.961004	1.51607	1.5338
simsample384	-46.05	4877810	3.37643	2.70986	0.00384124	0.00384124	6.04028	5.70504	0.0764449	5	3.68089	3.59374	3.87778	3.76853	4.29665	4.38236	4.0158	4.12018	4.0012	3.42893	4.45371	4.24936	4.2672	4.09075	4.45057	4.57065	2.39925	2.49724	3.17597	2.55349	1.82767	2.31275	2.39815	1.89352	2.02772	1.48969	1.46422	1.38693	1.48992	1.32257	1.14644	1.17167	1.23171	1.02775	1.15462	1.31551	1.00731	1.59985	1.60555
simsample385	-53.3	4398310	3.33699	2.72291	0.00389605	0.00389605	6.07635	5.94666	0.101811	5	3.38614	3.25133	3.58379	3.52202	3.94459	4.11735	3.68033	3.78622	3.69961	3.10342	4.05556	3.94473	3.90892	3.80513	4.07132	4.26284	2.32196	2.45213	3.0782	2.49927	1.77415	2.23916	2.34356	1.86528	1.99571	1.47103	1.45369	1.37132	1.47571	1.30531	1.13098	1.14966	1.21045	1.01031	1.13344	1.30036	0.989928	1.5629	1.57812
simsample386	-49.85	4426890	3.33968	2.76916	0.00391666	0.00391666	5.7534	5.86482	0.0979691	5	3.40783	3.28014	3.60387	3.5378	3.97131	4.13073	3.70596	3.81035	3.71997	3.13182	4.08356	3.96282	3.93415	3.82214	4.09745	4.27843	2.32348	2.44798	3.07574	2.49534	1.77513	2.23936	2.34037	1.86231	1.9921	1.46893	1.45028	1.36897	1.47241	1.30348	1.12994	1.14943	1.20971	1.01013	1.13302	1.29821	0.989981	1.56232	1.57635
simsample387	-58	4429180	3.34761	2.74241	0.00394823	0.00394823	6.03199	5.97502	0.107186	5	3.30885	3.16563	3.50493	3.4505	3.84826	4.03911	3.59304	3.69973	3.62035	3.02358	3.95654	3.86438	3.81878	3.72955	3.97675	4.18123	2.29392	2.4289	3.04165	2.47442	1.75273	2.21118	2.31791	1.84606	1.97456	1.45621	1.44083	1.35797	1.46168	1.29167	1.11832	1.13531	1.19565	0.99771	1.11897	1.28487	0.976296	1.5393	1.55582
simsample388	-55.3	4115160	3.29875	2.84005	0.00394916	0.00394916	6.04374	5.85073	0.106154	5	3.3117	3.17039	3.50741	3.46161	3.86249	4.04443	3.59727	3.69928	3.61857	3.02716	3.94561	3.85669	3.81108	3.72306	3.96532	4.16735	2.30248	2.43776	3.04298	2.47993	1.763	2.21843	2.32632	1.86128	1.98931	1.47095	1.45429	1.37097	1.4749	1.30512	1.13289	1.15039	1.21104	1.01253	1.13439	1.30302	0.993964	1.56203	1.58021
simsample389	-49.2	5154870	3.41774	2.63995	0.0038718	0.0038718	5.9883	6.00437	0.0948065	5	3.54394	3.4184	3.74532	3.65555	4.11304	4.27469	3.85377	3.96803	3.87187	3.26506	4.27632	4.13106	4.11148	3.98187	4.28867	4.46528	2.38479	2.50559	3.16954	2.56025	1.81465	2.29834	2.39638	1.89129	2.02515	1.48675	1.46787	1.38604	1.49116	1.3183	1.13852	1.1587	1.21967	1.01549	1.1409	1.30466	0.990324	1.57134	1.58141
simsample390	-56.4	4323670	3.3449	2.74919	0.00394898	0.00394898	5.71628	6.01223	0.101918	5	3.32878	3.19578	3.52279	3.46189	3.87551	4.0469	3.61767	3.72215	3.63745	3.05163	3.98613	3.87852	3.843	3.74172	4.0025	4.19156	2.28498	2.41255	3.02761	2.4588	1.74558	2.20251	2.30479	1.83422	1.9621	1.44664	1.42963	1.34858	1.45101	1.28346	1.11186	1.13007	1.18972	0.993034	1.11388	1.27747	0.972472	1.53447	1.54933
simsample391	-53.85	5631160	3.43271	2.497	0.00396723	0.00396723	5.87576	5.65381	0.105778	5	3.35033	3.20911	3.54854	3.47039	3.87902	4.07516	3.63738	3.75359	3.67217	3.06409	4.04399	3.93049	3.89195	3.78953	4.06164	4.26192	2.2891	2.42065	3.05849	2.47443	1.74119	2.21024	2.31327	1.82339	1.95407	1.43168	1.41755	1.33607	1.43965	1.26914	1.09336	1.11034	1.17014	0.972305	1.09325	1.25417	0.945958	1.5042	1.51619
simsample392	-48.9	4323650	3.31398	2.67181	0.0038723	0.0038723	5.61817	5.67242	0.0825763	5	3.50555	3.4096	3.69855	3.61081	4.10407	4.20216	3.82302	3.92142	3.81242	3.24931	4.22538	4.04988	4.05296	3.89966	4.22426	4.35774	2.31297	2.41919	3.06426	2.47076	1.76721	2.23396	2.32431	1.8444	1.97532	1.45322	1.42988	1.35321	1.45487	1.29108	1.12115	1.14482	1.2041	1.00569	1.12936	1.29096	0.988952	1.56856	1.57776
simsample393	-50.5	4326220	3.33217	2.68775	0.0039104	0.0039104	5.64551	6.05592	0.101759	5	3.40722	3.27196	3.60647	3.54379	3.97077	4.14354	3.70349	3.81	3.72244	3.12184	4.08277	3.96946	3.93382	3.82839	4.09771	4.28969	2.33325	2.4646	3.09564	2.51241	1.78282	2.25119	2.35651	1.87514	2.00678	1.47847	1.46107	1.3783	1.48353	1.31209	1.13684	1.15577	1.21703	1.01564	1.13969	1.30799	0.995472	1.57301	1.58831
simsample394	-53	4738500	3.37453	2.79354	0.00397457	0.00397457	5.89785	5.92967	0.117789	5	3.24535	3.08261	3.4431	3.40085	3.76083	3.99173	3.51789	3.62915	3.56174	2.94915	3.86878	3.81006	3.74469	3.68108	3.89833	4.13288	2.30011	2.44788	3.05092	2.4918	1.75758	2.21536	2.32919	1.85706	1.98503	1.46558	1.4537	1.36768	1.47268	1.29892	1.12272	1.13676	1.19772	0.998853	1.11949	1.28735	0.974412	1.53186	1.55111
simsample395	-52.75	4849930	3.36423	2.8457	0.00404658	0.00404658	5.78893	5.49284	0.11552	5	3.17545	3.02056	3.3674	3.32622	3.68306	3.89967	3.44329	3.54991	3.48205	2.8899	3.7827	3.72157	3.66126	3.59561	3.81053	4.03355	2.24536	2.38652	2.97331	2.4285	1.71641	2.16148	2.27096	1.81251	1.93678	1.43123	1.41865	1.33524	1.43714	1.26858	1.09749	1.11171	1.17097	0.977263	1.0949	1.25832	0.954266	1.49859	1.51721
simsample396	-52.6	4885550	3.39472	2.79566	0.00395052	0.00395052	5.88387	5.77683	0.0995577	5	3.36251	3.23241	3.55565	3.48517	3.90343	4.07374	3.65417	3.76178	3.67551	3.09083	4.03502	3.91998	3.8895	3.78204	4.05257	4.23729	2.299	2.42127	3.04424	2.46948	1.75292	2.21272	2.31112	1.8333	1.96058	1.44459	1.42718	1.34667	1.44813	1.28074	1.10777	1.12596	1.18497	0.988285	1.10861	1.26864	0.964786	1.5225	1.53514
simsample397	-50.05	4326980	3.30246	2.67643	0.00394142	0.00394142	5.55444	5.69685	0.107358	5	3.29983	3.15749	3.49688	3.44713	3.84884	4.03401	3.58411	3.68805	3.60768	3.01108	3.94256	3.84946	3.80339	3.71404	3.9601	4.16312	2.2851	2.42255	3.0326	2.46702	1.74829	2.20579	2.3147	1.8473	1.97668	1.45768	1.44204	1.35913	1.4636	1.29373	1.12164	1.13913	1.19996	1.00183	1.12381	1.29252	0.983175	1.55146	1.56919
simsample398	-51.3	4946010	3.40754	2.75776	0.00391958	0.00391958	5.91246	5.89403	0.0929033	5	3.46584	3.34655	3.66072	3.57604	4.02501	4.17522	3.76991	3.87872	3.78348	3.1987	4.17308	4.03194	4.01507	3.88755	4.18567	4.35376	2.33503	2.44998	3.09314	2.50139	1.77825	2.24756	2.3418	1.85235	1.98183	1.45802	1.4385	1.35877	1.46071	1.29279	1.11795	1.13798	1.19725	0.998108	1.12035	1.27993	0.974264	1.54128	1.55135
simsample399	-52.35	4474270	3.34501	2.70354	0.00393409	0.00393409	5.76442	5.84561	0.0992385	5	3.36405	3.23566	3.55883	3.49233	3.9189	4.08134	3.65769	3.76236	3.67396	3.08814	4.03539	3.91645	3.88644	3.77682	4.04896	4.23082	2.29313	2.41813	3.0411	2.46592	1.75119	2.21162	2.31247	1.83801	1.967	1.4488	1.43103	1.3505	1.45319	1.28566	1.11371	1.13275	1.19253	0.99509	1.11671	1.28029	0.974792	1.5408	1.55465
simsample400	-52.25	5039000	3.40292	2.60399	0.0038596	0.0038596	6.27007	5.9688	0.0936688	5	3.53429	3.41208	3.73503	3.64505	4.10719	4.26156	3.84464	3.95716	3.85947	3.25673	4.26649	4.11658	4.09952	3.9668	4.27638	4.44789	2.37027	2.49	3.15227	2.5447	1.80432	2.28615	2.38368	1.88173	2.01561	1.47922	1.46005	1.37897	1.48384	1.31215	1.13377	1.15442	1.21528	1.01195	1.13722	1.30097	0.988075	1.56934	1.57937
simsample401	-55.7	4757400	3.3772	2.77931	0.00396793	0.00396793	6.09144	5.85066	0.106429	5	3.32922	3.18619	3.52516	3.46626	3.86485	4.05777	3.61481	3.72362	3.64398	3.04612	3.98447	3.89036	3.84625	3.75512	4.00605	4.21029	2.30639	2.43928	3.05667	2.48587	1.76053	2.2212	2.32629	1.84972	1.97801	1.45853	1.44307	1.36019	1.46357	1.29318	1.11859	1.13544	1.19555	0.997207	1.11832	1.28258	0.973917	1.53508	1.55055
simsample402	-50.4	4461590	3.34213	2.77205	0.00390962	0.00390962	5.80713	5.87642	0.100428	5	3.39884	3.26613	3.59584	3.53287	3.9585	4.12748	3.69467	3.80018	3.7124	3.11901	4.06975	3.95668	3.92313	3.81701	4.08565	4.27416	2.32853	2.45642	3.08302	2.50337	1.77907	2.244	2.34704	1.8683	1.99831	1.4738	1.4559	1.37371	1.47773	1.30762	1.13321	1.1521	1.2127	1.01251	1.13557	1.30178	0.991882	1.56453	1.57935
simsample403	-55	4460070	3.37587	2.81384	0.00393909	0.00393909	5.72725	6.13328	0.100164	5	3.36588	3.23442	3.55981	3.49343	3.9115	4.08219	3.65799	3.76444	3.67831	3.09203	4.03353	3.92167	3.8893	3.78398	4.05114	4.23797	2.30655	2.43079	3.05229	2.478	1.76023	2.22036	2.32036	1.84381	1.97156	1.45386	1.43632	1.35522	1.45734	1.28925	1.11605	1.13434	1.19379	0.996243	1.11723	1.2792	0.973758	1.53529	1.5489
simsample404	-52.4	4246380	3.31373	2.79889	0.00390596	0.00390596	5.99243	5.81183	0.094119	5	3.4375	3.31717	3.63303	3.56616	4.01459	4.15724	3.7411	3.84231	3.7472	3.16582	4.11752	3.98661	3.96464	3.84424	4.12818	4.29835	2.33059	2.45135	3.08072	2.49823	1.78233	2.24667	2.34598	1.86953	1.99957	1.47559	1.45527	1.3746	1.47794	1.30988	1.13723	1.1579	1.21821	1.01819	1.14175	1.30762	0.999936	1.57717	1.59087
simsample405	-51.25	4900820	3.3811	2.83379	0.0039928	0.0039928	5.76071	5.64933	0.108913	5	3.27802	3.13167	3.47193	3.41818	3.80228	4.00255	3.55765	3.66582	3.59011	2.99604	3.91691	3.8338	3.78502	3.70207	3.94117	4.1508	2.28643	2.42071	3.02725	2.46568	1.74579	2.20054	2.30614	1.83564	1.96204	1.44821	1.43356	1.35067	1.45313	1.28369	1.11033	1.12625	1.18582	0.989349	1.10896	1.272	0.965679	1.51933	1.53552
simsample406	-50.25	5575100	3.42066	2.47687	0.00393697	0.00393697	5.8093	5.62165	0.100284	5	3.4312	3.29884	3.63116	3.54501	3.97984	4.15706	3.72862	3.84402	3.75489	3.14721	4.14806	4.01442	3.98629	3.8683	4.16075	4.34717	2.31758	2.44415	3.09583	2.49948	1.76269	2.23851	2.33915	1.84266	1.97538	1.44649	1.43039	1.34942	1.45373	1.28284	1.10609	1.12482	1.18514	0.985081	1.10802	1.27009	0.959903	1.52867	1.53943
simsample407	-47.7	4579200	3.38639	2.81036	0.00384663	0.00384663	5.82121	6.03886	0.0745814	5	3.65876	3.57566	3.85211	3.74284	4.26815	4.34784	3.99204	4.09459	3.97549	3.41489	4.42307	4.21918	4.23997	4.06282	4.42099	4.5357	2.38491	2.47815	3.14889	2.53296	1.81643	2.29546	2.37775	1.8783	2.01001	1.47854	1.45248	1.37618	1.47731	1.31224	1.13786	1.16297	1.22199	1.02028	1.1455	1.30335	0.999487	1.58408	1.58922
simsample408	-55.95	4782560	3.36321	2.8042	0.00398849	0.00398849	5.96292	5.67193	0.119395	5	3.1809	3.01824	3.37581	3.3383	3.68767	3.91872	3.44738	3.55629	3.49144	2.88725	3.78725	3.73499	3.66752	3.60909	3.81715	4.05188	2.26289	2.41078	3.00068	2.45297	1.73008	2.17958	2.29326	1.83073	1.95662	1.44544	1.43409	1.34891	1.45257	1.28114	1.10778	1.1213	1.18152	0.985657	1.10447	1.27085	0.962114	1.51135	1.53126
simsample409	-50.15	4891580	3.3832	2.84397	0.00398355	0.00398355	5.75546	5.66232	0.105815	5	3.30753	3.16626	3.50117	3.44298	3.83788	4.02836	3.59124	3.69892	3.61982	3.02902	3.95568	3.86327	3.82014	3.72977	3.9781	4.17998	2.29387	2.42424	3.03546	2.46988	1.75099	2.20724	2.31058	1.83803	1.96463	1.4499	1.43422	1.35197	1.45413	1.28525	1.11193	1.1286	1.18803	0.99131	1.11123	1.27352	0.967796	1.52324	1.53844
simsample410	-51.15	4365170	3.34953	2.80158	0.00391516	0.00391516	5.68385	5.96301	0.0931736	5	3.42878	3.31046	3.62253	3.54936	3.99625	4.13918	3.73123	3.83425	3.73924	3.16162	4.11437	3.97981	3.96063	3.8376	4.12556	4.29265	2.31841	2.43548	3.06571	2.48363	1.77036	2.23331	2.32967	1.85169	1.98058	1.46029	1.44022	1.36052	1.46256	1.29581	1.12351	1.14393	1.20343	1.00505	1.12733	1.28963	0.984889	1.55469	1.56691
simsample411	-49.9	4318870	3.33014	2.80445	0.00389786	0.00389786	5.7612	5.82249	0.0883211	5	3.47998	3.37084	3.67384	3.59622	4.06427	4.18761	3.79052	3.89111	3.78967	3.21754	4.17885	4.0284	4.01846	3.8829	4.18567	4.33915	2.33257	2.44492	3.08211	2.49374	1.78226	2.248	2.34204	1.86233	1.99221	1.46902	1.44708	1.36815	1.47034	1.30413	1.13209	1.15402	1.21367	1.01423	1.13766	1.30057	0.995661	1.57246	1.58375
simsample412	-56.9	4319600	3.34311	2.74481	0.00394898	0.00394898	5.7195	6.02114	0.104569	5	3.30814	3.17045	3.50263	3.4456	3.85019	4.03043	3.5938	3.69884	3.61701	3.02757	3.95803	3.8586	3.81806	3.72321	3.97615	4.17231	2.28224	2.41327	3.02499	2.45889	1.74383	2.20002	2.30435	1.83494	1.96277	1.44741	1.43123	1.34951	1.45231	1.28405	1.11218	1.12976	1.1896	0.992867	1.1136	1.27804	0.972133	1.53328	1.54903
simsample413	-55.4	4765220	3.38384	2.8021	0.0039701	0.0039701	5.79013	5.74701	0.101179	5	3.30772	3.1764	3.49886	3.43339	3.84141	4.0139	3.59404	3.69984	3.61624	3.03696	3.96483	3.85701	3.8235	3.72177	3.98299	4.16975	2.26978	2.3931	3.00514	2.43986	1.73165	2.18495	2.28384	1.81382	1.93959	1.42986	1.41303	1.333	1.4336	1.2678	1.09696	1.11466	1.17318	0.978728	1.09769	1.25695	0.956003	1.50765	1.52105
simsample414	-58.25	4480530	3.35398	2.74128	0.00400224	0.00400224	5.72	5.96097	0.117351	5	3.18519	3.02685	3.37984	3.33911	3.69667	3.91891	3.45336	3.56133	3.49399	2.89293	3.79757	3.73694	3.67374	3.60945	3.82457	4.05248	2.25196	2.39752	2.98955	2.44047	1.72147	2.17076	2.28313	1.82127	1.94749	1.43726	1.42539	1.34118	1.44458	1.27429	1.10204	1.11624	1.17631	0.981108	1.09994	1.26587	0.958527	1.50854	1.52781
simsample415	-56.25	4339350	3.32983	2.79013	0.00392917	0.00392917	6.03422	5.93565	0.112077	5	3.27855	3.1264	3.47575	3.43205	3.81346	4.01945	3.55762	3.66404	3.58975	2.98677	3.90751	3.83308	3.77743	3.70139	3.93148	4.14975	2.29972	2.44182	3.0463	2.48481	1.75915	2.21603	2.32737	1.85903	1.98739	1.46804	1.4538	1.36913	1.47383	1.30201	1.12793	1.14381	1.20478	1.00599	1.12748	1.29633	0.984988	1.5491	1.56805
simsample416	-53.3	4436060	3.35295	2.71489	0.00393507	0.00393507	5.7266	6.03699	0.100624	5	3.38614	3.25377	3.58281	3.51687	3.9416	4.11158	3.68067	3.78719	3.69976	3.10645	4.0606	3.94528	3.91233	3.80525	4.07585	4.26362	2.31498	2.44249	3.06997	2.49055	1.76755	2.23205	2.3345	1.85535	1.9853	1.46246	1.44502	1.36338	1.46705	1.29755	1.12359	1.14237	1.20271	1.00344	1.12597	1.29097	0.982297	1.55201	1.56623
simsample417	-51.1	5571300	3.41839	2.45776	0.00393697	0.00393697	5.85822	5.65047	0.105092	5	3.39104	3.25002	3.59193	3.51267	3.93092	4.12463	3.68255	3.7991	3.71533	3.10077	4.09475	3.97597	3.93851	3.83233	4.11048	4.31008	2.31038	2.44344	3.08944	2.49801	1.75792	2.23253	2.33697	1.84244	1.97522	1.44654	1.43205	1.34994	1.45497	1.28281	1.10559	1.1232	1.18387	0.983767	1.10648	1.27004	0.958237	1.5254	1.53768
simsample418	-56.85	5349500	3.42697	2.68614	0.00398769	0.00398769	6.02835	5.86867	0.118703	5	3.25179	3.08696	3.45033	3.39812	3.75613	3.99654	3.52367	3.64055	3.57448	2.95483	3.89335	3.83038	3.76527	3.69979	3.92378	4.16132	2.29742	2.44509	3.05871	2.49322	1.75176	2.21437	2.32708	1.84583	1.97453	1.45348	1.4428	1.35708	1.462	1.28753	1.10965	1.12313	1.18374	0.984947	1.10506	1.27007	0.957094	1.50982	1.52691
simsample419	-48.5	4458440	3.36567	2.83557	0.0038768	0.0038768	5.80375	6.05921	0.0879578	5	3.53939	3.42864	3.73536	3.65144	4.12432	4.253	3.85418	3.95868	3.85615	3.27572	4.25459	4.10072	4.09192	3.95318	4.26321	4.41892	2.37118	2.48267	3.13206	2.53309	1.80916	2.28252	2.37589	1.88531	2.01637	1.48626	1.46419	1.38431	1.48728	1.31874	1.14336	1.16525	1.22532	1.02336	1.14795	1.31077	1.00235	1.58293	1.59327
simsample420	-50.55	4413520	3.33862	2.71056	0.00388312	0.00388312	5.99894	5.99758	0.0940535	5	3.50687	3.38462	3.7066	3.63157	4.09051	4.23813	3.81628	3.92214	3.82491	3.22938	4.21208	4.07281	4.05214	3.92607	4.22196	4.39432	2.36763	2.48993	3.13757	2.54009	1.80813	2.2837	2.38392	1.8939	2.02702	1.49277	1.47268	1.39101	1.49622	1.32504	1.14867	1.16967	1.23097	1.02754	1.15324	1.3207	1.00758	1.59372	1.60649
simsample421	-52.75	4938390	3.41103	2.8172	0.00395052	0.00395052	5.95946	5.88872	0.0965483	5	3.41195	3.28616	3.60552	3.52826	3.95833	4.12144	3.70894	3.81766	3.72785	3.1434	4.09959	3.9744	3.94979	3.83411	4.11619	4.29438	2.32023	2.4385	3.0704	2.48799	1.76764	2.23168	2.32766	1.84375	1.97156	1.45221	1.43382	1.35353	1.45495	1.28722	1.11302	1.13184	1.1908	0.993	1.11395	1.2731	0.968591	1.52894	1.54021
simsample422	-56.05	4470370	3.3747	2.78316	0.00390179	0.00390179	6.0081	6.13029	0.0924349	5	3.46227	3.34429	3.65709	3.5778	4.02956	4.1739	3.76738	3.87307	3.77686	3.19498	4.16145	4.0215	4.00448	3.87746	4.17277	4.3391	2.33458	2.45036	3.08924	2.50024	1.78059	2.24815	2.34348	1.85859	1.98825	1.46452	1.44442	1.36459	1.4669	1.2992	1.12524	1.14573	1.20533	1.0059	1.12867	1.29024	0.984162	1.55521	1.56637
simsample423	-57.4	4881080	3.41431	2.9075	0.00402296	0.00402296	5.72253	5.84717	0.105829	5	3.2468	3.10741	3.43577	3.37601	3.75906	3.95019	3.52427	3.63175	3.55528	2.97643	3.88422	3.79546	3.75317	3.66545	3.90866	4.10814	2.25568	2.38174	2.98189	2.4269	1.72024	2.16774	2.26752	1.80151	1.92467	1.42075	1.4055	1.3248	1.42428	1.25863	1.08788	1.10373	1.16153	0.96889	1.08576	1.24276	0.94377	1.48377	1.4978
simsample424	-52.65	4811060	3.37498	2.80078	0.00398355	0.00398355	5.81448	5.65413	0.106498	5	3.27268	3.13182	3.4652	3.40837	3.79946	3.98926	3.55337	3.66001	3.58188	2.99454	3.91476	3.82353	3.77976	3.69093	3.93634	4.13757	2.26947	2.4002	3.00609	2.44558	1.73266	2.18517	2.2886	1.82065	1.94662	1.43597	1.4207	1.3391	1.44072	1.27315	1.1015	1.11803	1.17714	0.982074	1.10115	1.26281	0.959268	1.51108	1.52648
simsample425	-51.15	5014630	3.41029	2.89246	0.00401625	0.00401625	5.62703	5.72055	0.106191	5	3.27764	3.13631	3.46883	3.40911	3.79571	3.98945	3.55772	3.66622	3.58916	3.00353	3.92098	3.83186	3.78851	3.70046	3.94548	4.14774	2.27765	2.40578	3.01193	2.45138	1.73722	2.18941	2.29073	1.82021	1.94484	1.43549	1.4202	1.3386	1.43928	1.2718	1.09932	1.11533	1.17383	0.979137	1.09732	1.25636	0.953997	1.50021	1.51459
simsample426	-58.75	4409630	3.36559	2.81194	0.0039765	0.0039765	5.87378	6.07496	0.106732	5	3.27645	3.13497	3.46942	3.41452	3.80583	3.9957	3.55751	3.66362	3.58547	2.99721	3.91649	3.82666	3.78206	3.69412	3.93812	4.14032	2.27452	2.40617	3.0116	2.45102	1.73724	2.19008	2.29429	1.82677	1.95298	1.44128	1.42591	1.34398	1.44595	1.27797	1.10614	1.12273	1.18207	0.986499	1.10595	1.26861	0.964182	1.51807	1.53395
simsample427	-52.3	5403330	3.43282	2.69027	0.00395988	0.00395988	5.98954	5.79797	0.10651	5	3.36269	3.21804	3.56027	3.48956	3.8904	4.09171	3.64978	3.76485	3.68531	3.07831	4.04178	3.94067	3.89822	3.80281	4.06429	4.27055	2.31948	2.45146	3.08345	2.50223	1.76605	2.23405	2.33767	1.84888	1.9783	1.45455	1.43988	1.35698	1.46056	1.28876	1.11157	1.12803	1.18798	0.988747	1.10991	1.27173	0.96178	1.52079	1.53393
simsample428	-50.5	4274830	3.29168	2.73361	0.00389788	0.00389788	6.06287	5.76335	0.108229	5	3.36781	3.22042	3.56915	3.52293	3.92932	4.12084	3.6574	3.76263	3.68162	3.07199	4.0163	3.92712	3.87751	3.79008	4.0357	4.24633	2.34198	2.48384	3.10327	2.52771	1.793	2.25939	2.37179	1.89626	2.02808	1.4975	1.48143	1.39607	1.503	1.32895	1.15298	1.17061	1.23292	1.03007	1.15482	1.3283	1.01143	1.59299	1.61202
simsample429	-53.45	4743910	3.34797	2.80525	0.00403799	0.00403799	5.74805	5.46668	0.11454	5	3.17763	3.02497	3.36975	3.3284	3.6903	3.90128	3.44651	3.55193	3.48256	2.89184	3.78635	3.72116	3.66274	3.59429	3.81222	4.03168	2.24	2.38067	2.96785	2.42262	1.71281	2.15768	2.26713	1.81	1.93468	1.42916	1.41623	1.33319	1.43521	1.26713	1.09679	1.11147	1.17083	0.977256	1.09517	1.2592	0.955435	1.50183	1.52053
simsample430	-54.35	4910120	3.41076	2.75959	0.00393502	0.00393502	5.96501	5.91589	0.0933031	5	3.4298	3.31083	3.62282	3.53911	3.982	4.13263	3.73035	3.83847	3.7447	3.16489	4.1296	3.99112	3.97367	3.84837	4.14257	4.31028	2.31255	2.42673	3.06346	2.47765	1.76095	2.22572	2.31919	1.83424	1.9624	1.4437	1.42451	1.34546	1.44641	1.27999	1.1067	1.12639	1.18507	0.98788	1.10885	1.26679	0.964011	1.52494	1.53494
simsample431	-50	4396620	3.32497	2.77198	0.00391666	0.00391666	5.91027	5.87071	0.106846	5	3.36752	3.22251	3.56704	3.51546	3.92178	4.11216	3.65727	3.76378	3.68241	3.07706	4.02081	3.92826	3.88173	3.79144	4.04092	4.24802	2.33694	2.47472	3.09516	2.51966	1.78725	2.25259	2.3619	1.88474	2.01544	1.48783	1.47168	1.38717	1.49289	1.31996	1.14407	1.16161	1.2232	1.02151	1.14523	1.31542	1.00108	1.57659	1.59418
simsample432	-53.35	5377030	3.43083	2.68078	0.00395988	0.00395988	6.02963	5.73621	0.101427	5	3.38261	3.2481	3.57832	3.50056	3.91742	4.09958	3.67415	3.78724	3.70232	3.10565	4.07242	3.95518	3.92289	3.81512	4.09083	4.28164	2.30921	2.43392	3.06862	2.48542	1.75746	2.22409	2.32335	1.83562	1.96451	1.4436	1.4274	1.34632	1.44867	1.27933	1.10392	1.12158	1.18086	0.982963	1.10374	1.26331	0.956892	1.51492	1.52644
simsample433	-54.35	4809620	3.34045	2.83538	0.00406891	0.00406891	5.81297	5.3478	0.125458	5	3.08013	2.91099	3.2725	3.24749	3.57195	3.81524	3.3354	3.44181	3.38388	2.78465	3.65421	3.62194	3.54468	3.50183	3.68713	3.93233	2.22077	2.37442	2.94324	2.41305	1.70009	2.13888	2.25586	1.80673	1.93014	1.42808	1.41846	1.33293	1.43578	1.26567	1.09506	1.10702	1.16681	0.973991	1.09072	1.25733	0.95153	1.4912	1.51356
simsample434	-54.25	4389920	3.36474	2.80356	0.00388164	0.00388164	6.0232	6.06168	0.0869765	5	3.49273	3.38585	3.68577	3.60078	4.07127	4.19395	3.80411	3.90693	3.80456	3.23381	4.20212	4.0457	4.03938	3.89934	4.20915	4.3591	2.33273	2.4415	3.08331	2.49183	1.77957	2.24642	2.33775	1.85391	1.9833	1.46104	1.4391	1.36081	1.46219	1.29653	1.12403	1.1459	1.20503	1.00622	1.12903	1.28916	0.985742	1.55825	1.56801
simsample435	-50.3	4304810	3.32685	2.68677	0.0039104	0.0039104	5.60904	6.04147	0.103414	5	3.39256	3.25438	3.59211	3.5326	3.95384	4.13172	3.6867	3.79321	3.70746	3.1049	4.06214	3.95437	3.91542	3.8143	4.0781	4.27452	2.33091	2.4646	3.0928	2.51178	1.78152	2.2491	2.35588	1.87591	2.0075	1.47936	1.46244	1.37922	1.48471	1.31287	1.13759	1.15615	1.21756	1.01615	1.14015	1.30921	0.996127	1.57342	1.58943
simsample436	-61.9	5609080	3.43598	2.45169	0.0040228	0.0040228	6.02253	5.80656	0.12025	5	3.20672	3.04246	3.40541	3.34654	3.7037	3.94605	3.47461	3.59364	3.52841	2.90681	3.8584	3.78807	3.72361	3.65561	3.88503	4.12114	2.25008	2.39921	3.01568	2.45081	1.71342	2.17525	2.28817	1.80717	1.93674	1.41949	1.41035	1.32615	1.43081	1.25792	1.08193	1.09532	1.15554	0.959244	1.07832	1.24158	0.931381	1.47888	1.49484
simsample437	-56	4868460	3.40906	2.91327	0.00402296	0.00402296	5.72507	5.85082	0.106465	5	3.26491	3.12345	3.45538	3.39703	3.78089	3.97491	3.54375	3.65169	3.57528	2.99167	3.90378	3.81675	3.7728	3.68622	3.9287	4.13125	2.27177	2.39977	3.00275	2.44483	1.733	2.18332	2.28452	1.81608	1.94015	1.43257	1.41733	1.33584	1.4362	1.26917	1.09721	1.11307	1.1714	0.977284	1.09506	1.25373	0.952239	1.49657	1.51112
simsample438	-49.2	5081430	3.4024	2.61263	0.0038615	0.0038615	6.1742	5.96115	0.0902549	5	3.61062	3.49359	3.81334	3.71715	4.1984	4.34191	3.92971	4.04267	3.93952	3.33417	4.36246	4.19904	4.18885	4.0453	4.36989	4.5335	2.40625	2.523	3.19826	2.57905	1.8314	2.32056	2.41673	1.90685	2.04258	1.49882	1.47823	1.39692	1.50274	1.32968	1.14934	1.17113	1.23258	1.02655	1.15371	1.31871	1.00277	1.59333	1.60242
simsample439	-54.85	4823820	3.34067	2.82752	0.00406891	0.00406891	5.81387	5.32969	0.126122	5	3.06787	2.89816	3.2599	3.23555	3.55738	3.80208	3.32182	3.42819	3.37101	2.77232	3.63946	3.60876	3.53065	3.48917	3.67258	3.91869	2.21415	2.36829	2.93524	2.40681	1.69505	2.13272	2.24991	1.80197	1.92512	1.42426	1.4149	1.32944	1.43214	1.26228	1.09201	1.10379	1.16348	0.971131	1.08755	1.25393	0.948653	1.4868	1.50928
simsample440	-55.8	4221190	3.31829	2.77153	0.00393958	0.00393958	5.88041	5.80785	0.0964511	5	3.35288	3.23067	3.54519	3.48142	3.91338	4.06185	3.64759	3.74801	3.65729	3.08311	4.01585	3.89349	3.86781	3.75476	4.02767	4.20072	2.28081	2.40207	3.01772	2.44803	1.74391	2.19909	2.29804	1.83083	1.95843	1.44471	1.42566	1.34611	1.44773	1.28235	1.11274	1.13243	1.1917	0.995651	1.11665	1.27966	0.977284	1.54199	1.55593
simsample441	-50.55	5572690	3.41965	2.47662	0.00393697	0.00393697	5.81045	5.61797	0.102521	5	3.40522	3.26902	3.6051	3.52267	3.94848	4.1331	3.69921	3.81482	3.72845	3.11909	4.11364	3.98774	3.9552	3.84326	4.12794	4.32026	2.3102	2.43946	3.08672	2.49416	1.75748	2.23156	2.33373	1.83936	1.97174	1.44413	1.42878	1.34742	1.45181	1.28068	1.10407	1.12222	1.18257	0.982898	1.10545	1.26786	0.957589	1.5243	1.53579
simsample442	-50.35	4159700	3.32041	2.7865	0.00385577	0.00385577	6.01218	6.0224	0.0830477	5	3.58024	3.48025	3.77652	3.69048	4.18804	4.292	3.90353	4.00366	3.8938	3.3203	4.30648	4.13468	4.1356	3.98335	4.30841	4.4482	2.37457	2.48265	3.13725	2.53362	1.81466	2.28984	2.38195	1.89287	2.02548	1.49282	1.46877	1.38988	1.49336	1.32577	1.15172	1.17551	1.23594	1.03307	1.15911	1.32391	1.01537	1.60564	1.61554
simsample443	-55.15	4832180	3.36299	2.8154	0.00402083	0.00402083	5.92004	5.48124	0.108114	5	3.23921	3.09652	3.43084	3.37877	3.76228	3.95491	3.5164	3.62175	3.54568	2.96056	3.86958	3.78492	3.73806	3.65426	3.89195	4.09613	2.25515	2.38757	2.986	2.4316	1.7228	2.17146	2.27594	1.81308	1.93823	1.43073	1.41587	1.33422	1.43557	1.26858	1.09803	1.11416	1.17314	0.979095	1.09754	1.25943	0.956962	1.5061	1.52238
simsample444	-50.05	4451760	3.34275	2.69312	0.00389598	0.00389598	5.66423	5.94468	0.0966657	5	3.44391	3.31821	3.6418	3.57034	4.01442	4.17012	3.74614	3.85191	3.75885	3.16614	4.13506	4.00509	3.97972	3.86133	4.14662	4.3242	2.33506	2.45913	3.09668	2.50847	1.78304	2.2525	2.35333	1.86951	2.00102	1.47336	1.45447	1.3732	1.47746	1.30766	1.13304	1.15312	1.21383	1.0129	1.13689	1.3028	0.992682	1.57023	1.5835
simsample445	-54.85	4868010	3.39848	2.89982	0.00402296	0.00402296	5.7402	5.82022	0.115095	5	3.20167	3.04571	3.39386	3.34851	3.70508	3.92624	3.47114	3.58047	3.51283	2.91769	3.81698	3.75551	3.69572	3.62927	3.847	4.07175	2.26506	2.40478	2.9973	2.44796	1.72981	2.17818	2.28639	1.82179	1.94601	1.43806	1.42548	1.34169	1.44349	1.27393	1.10095	1.11489	1.17401	0.979361	1.09703	1.25902	0.954028	1.49713	1.51469
simsample446	-52.6	4853950	3.35832	2.7689	0.00400665	0.00400665	5.79668	5.47843	0.110744	5	3.23234	3.0849	3.42559	3.37618	3.75422	3.95549	3.50777	3.61423	3.54027	2.94839	3.86063	3.78157	3.73008	3.65109	3.88386	4.09508	2.2582	2.39496	2.99397	2.43908	1.72538	2.17578	2.28295	1.81893	1.94497	1.4351	1.42111	1.33859	1.44091	1.27254	1.10112	1.11682	1.17632	0.981426	1.10039	1.26403	0.959273	1.51066	1.52781
simsample447	-52.25	4308040	3.33025	2.73266	0.00393369	0.00393369	5.78425	5.97893	0.102702	5	3.3656	3.22971	3.56266	3.50371	3.92156	4.096	3.6576	3.76272	3.67739	3.08271	4.02785	3.92104	3.88341	3.78266	4.04417	4.23743	2.31314	2.4442	3.06568	2.49052	1.76802	2.23061	2.33556	1.86038	1.99025	1.46759	1.45048	1.3681	1.47228	1.30227	1.12863	1.14707	1.20774	1.00827	1.13097	1.29793	0.988253	1.55939	1.5751
simsample448	-55.55	4150520	3.29679	2.78213	0.00392178	0.00392178	5.92213	5.65105	0.0932538	5	3.3629	3.2473	3.55409	3.48947	3.93223	4.06631	3.66088	3.75844	3.66418	3.09761	4.02771	3.89691	3.87694	3.75719	4.03663	4.19998	2.27589	2.39369	3.00867	2.43933	1.7415	2.19512	2.2923	1.82808	1.95547	1.44311	1.42284	1.34418	1.44533	1.28135	1.11318	1.13377	1.19281	0.997237	1.11828	1.28114	0.98047	1.54684	1.56036
simsample449	-55.5	4745480	3.34638	2.8065	0.00403799	0.00403799	5.72382	5.46625	0.121522	5	3.10912	2.94614	3.30115	3.26944	3.6069	3.83859	3.36874	3.47499	3.41308	2.81743	3.69618	3.65148	3.58122	3.52893	3.72636	3.96189	2.22192	2.37058	2.94589	2.41074	1.69995	2.14046	2.25442	1.80263	1.92639	1.42397	1.41328	1.3289	1.43126	1.26222	1.09199	1.10491	1.16442	0.971749	1.08866	1.25383	0.949396	1.49024	1.51106
simsample450	-50.6	4491650	3.34943	2.65522	0.00391788	0.00391788	5.52764	5.87859	0.0942445	5	3.41265	3.29355	3.60742	3.53118	3.97848	4.12373	3.71352	3.81795	3.72332	3.14167	4.10499	3.96671	3.94711	3.82303	4.11398	4.28162	2.29912	2.41821	3.05159	2.46825	1.75462	2.21867	2.31598	1.83698	1.96693	1.44679	1.42763	1.34839	1.45081	1.28422	1.1124	1.13279	1.1924	0.994625	1.11688	1.27925	0.974626	1.54417	1.55608
simsample451	-50.25	4409320	3.32928	2.7733	0.00391666	0.00391666	5.88162	5.85859	0.104001	5	3.37983	3.24033	3.57821	3.52215	3.93702	4.11748	3.67221	3.77799	3.69377	3.09403	4.03992	3.93855	3.89768	3.80056	4.05808	4.25687	2.33246	2.46595	3.08853	2.51161	1.78329	2.24815	2.35479	1.87749	2.00787	1.48177	1.4648	1.38132	1.4863	1.31467	1.13958	1.15774	1.21891	1.01791	1.14135	1.30993	0.997601	1.57204	1.5885
simsample452	-48	5620400	3.41453	2.46081	0.00393697	0.00393697	5.77838	5.63033	0.111354	5	3.35476	3.20193	3.55745	3.48785	3.88576	4.10154	3.63999	3.75814	3.68104	3.05588	4.04215	3.94348	3.89357	3.80291	4.06244	4.28018	2.31455	2.45655	3.09677	2.50988	1.76235	2.23704	2.3469	1.85327	1.98646	1.45581	1.44326	1.35912	1.4655	1.29085	1.11215	1.12832	1.18974	0.98857	1.11153	1.27784	0.962463	1.53002	1.54451
simsample453	-54.5	4866200	3.40816	2.90518	0.00402296	0.00402296	5.74245	5.86493	0.106723	5	3.27083	3.12864	3.46189	3.40365	3.78789	3.98308	3.55009	3.65836	3.58196	2.99643	3.91093	3.82415	3.77968	3.69332	3.93591	4.13953	2.27641	2.40515	3.0095	2.45035	1.73659	2.18803	2.28974	1.82023	1.94467	1.43579	1.42062	1.33889	1.43956	1.27206	1.09967	1.11554	1.17405	0.979449	1.09753	1.25674	0.954386	1.50015	1.51481
simsample454	-54.35	5294800	3.42149	2.7137	0.00394539	0.00394539	6.14284	5.78799	0.108238	5	3.3443	3.19675	3.5419	3.47631	3.8707	4.07644	3.62922	3.74343	3.66578	3.05807	4.01356	3.91963	3.87341	3.78328	4.03721	4.24802	2.31724	2.45176	3.07876	2.50128	1.7656	2.23185	2.33716	1.85134	1.98054	1.45743	1.44314	1.35971	1.46355	1.29143	1.11441	1.13054	1.19068	0.991433	1.11258	1.27553	0.965008	1.52418	1.53839
simsample455	-50.5	4149290	3.33669	2.81676	0.00384376	0.00384376	6.02544	6.06863	0.0707457	5	3.66618	3.59243	3.85826	3.75182	4.29349	4.35113	4.00494	4.10169	3.97744	3.42779	4.42847	4.21422	4.24184	4.05654	4.42118	4.52268	2.37628	2.46698	3.13474	2.52105	1.81413	2.29066	2.3721	1.87928	2.01135	1.48106	1.45332	1.37803	1.47913	1.31571	1.14361	1.17021	1.2293	1.02775	1.15357	1.31298	1.01048	1.60094	1.60628
simsample456	-53.95	4905160	3.3858	2.79063	0.00397791	0.00397791	5.83819	5.59734	0.100053	5	3.3145	3.18534	3.5054	3.43772	3.84967	4.01834	3.60201	3.70771	3.62287	3.04517	3.97557	3.86365	3.83247	3.7277	3.99278	4.17624	2.26838	2.39016	3.00383	2.43738	1.73021	2.18378	2.28171	1.81115	1.93695	1.42744	1.41033	1.33069	1.43109	1.26571	1.09509	1.11305	1.17145	0.977179	1.09611	1.25484	0.954488	1.50609	1.51901
simsample457	-55.5	4823330	3.35272	2.81771	0.00405626	0.00405626	5.75468	5.41276	0.120449	5	3.11043	2.94935	3.30171	3.26814	3.60754	3.8362	3.37059	3.47673	3.41407	2.82106	3.69934	3.65201	3.58375	3.52933	3.72919	3.96184	2.21885	2.36553	2.94107	2.40597	1.69722	2.13708	2.24972	1.79801	1.92138	1.42019	1.40922	1.32531	1.42719	1.25881	1.08893	1.102	1.16122	0.969044	1.08563	1.24972	0.946459	1.48567	1.50595
simsample458	-51.65	4290030	3.33716	2.78394	0.00393468	0.00393468	5.6814	5.97303	0.101065	5	3.34635	3.21431	3.5407	3.48062	3.898	4.06632	3.63732	3.74106	3.65521	3.06959	4.00432	3.89561	3.86107	3.75844	4.02052	4.20824	2.29672	2.42382	3.03998	2.46959	1.75526	2.21321	2.3155	1.84439	1.97252	1.45531	1.43776	1.35646	1.45915	1.29122	1.11924	1.13773	1.19758	1.00008	1.12146	1.28586	0.979946	1.54489	1.55992
simsample459	-51.15	4524700	3.34073	2.70777	0.00393409	0.00393409	5.81901	5.852	0.105277	5	3.35984	3.21876	3.55819	3.50033	3.9109	4.09615	3.64973	3.75694	3.67417	3.07266	4.02139	3.92071	3.87846	3.78277	4.03952	4.24047	2.3179	2.45245	3.07517	2.49917	1.77102	2.23547	2.34235	1.86468	1.99509	1.4705	1.45437	1.37117	1.476	1.30465	1.12981	1.14761	1.20861	1.00847	1.13137	1.29906	0.987497	1.55877	1.57493
simsample460	-51	5323810	3.42788	2.71715	0.00391708	0.00391708	6.05405	5.86909	0.102419	5	3.44588	3.30647	3.64561	3.56942	3.99038	4.17985	3.74233	3.85745	3.77208	3.16245	4.14381	4.02941	3.99397	3.88758	4.16397	4.3621	2.36052	2.48912	3.13416	2.54081	1.79719	2.2727	2.37489	1.87821	2.00951	1.47783	1.46144	1.37823	1.48281	1.30958	1.13032	1.14807	1.20868	1.00647	1.12974	1.29316	0.979861	1.54939	1.56175
simsample461	-54.5	4410290	3.3645	2.80798	0.00392673	0.00392673	5.93166	6.12293	0.0981061	5	3.41079	3.28219	3.60628	3.53786	3.96804	4.13147	3.70831	3.81434	3.72482	3.13645	4.08842	3.96904	3.94022	3.82889	4.1041	4.28652	2.3281	2.45138	3.08011	2.4991	1.7772	2.24172	2.34162	1.86125	1.99042	1.46777	1.44931	1.36797	1.47094	1.30191	1.1277	1.14681	1.2068	1.00739	1.1298	1.2934	0.985654	1.55459	1.56802
simsample462	-54.05	4228150	3.31992	2.79898	0.00390596	0.00390596	6.00834	5.81079	0.090321	5	3.43201	3.32012	3.6247	3.55208	4.00938	4.1376	3.73732	3.83687	3.73846	3.16859	4.11718	3.97489	3.96083	3.83181	4.12503	4.28269	2.30949	2.42391	3.05213	2.4715	1.76549	2.22628	2.32146	1.84783	1.97663	1.45799	1.43677	1.35797	1.45967	1.29439	1.12387	1.14522	1.20458	1.00677	1.12916	1.29184	0.988753	1.56085	1.57298
simsample463	-57.35	4214550	3.30024	2.75354	0.00394553	0.00394553	6.11251	5.77785	0.107705	5	3.29462	3.15132	3.49095	3.4445	3.84216	4.02865	3.57805	3.68114	3.60171	3.00708	3.92972	3.84162	3.79409	3.70773	3.94893	4.1537	2.28999	2.42743	3.03325	2.47049	1.7528	2.20851	2.31751	1.85218	1.98073	1.46268	1.44686	1.3636	1.46782	1.29794	1.12588	1.14312	1.20386	1.00576	1.1275	1.29626	0.987099	1.55428	1.57252
simsample464	-51	4248150	3.2963	2.81215	0.00392328	0.00392328	6.04597	5.68252	0.102254	5	3.36941	3.23415	3.56636	3.5142	3.93335	4.10277	3.66241	3.76433	3.67839	3.08673	4.02115	3.91799	3.87964	3.78066	4.0376	4.23031	2.32281	2.45455	3.07073	2.49838	1.77823	2.23901	2.34508	1.87437	2.00395	1.48072	1.46273	1.37982	1.48427	1.31412	1.14101	1.15972	1.22067	1.02053	1.14374	1.31287	1.00241	1.57751	1.5945
simsample465	-57.5	4379390	3.33564	2.82344	0.00396448	0.00396448	5.96015	5.93229	0.118418	5	3.21271	3.05057	3.40935	3.37468	3.73124	3.95779	3.48266	3.59007	3.52322	2.91643	3.81997	3.76615	3.6992	3.63907	3.84885	4.08269	2.28402	2.43295	3.02536	2.47404	1.74778	2.19997	2.31504	1.85175	1.97877	1.46306	1.4509	1.36497	1.4697	1.2971	1.12305	1.13714	1.19808	1.00033	1.12061	1.28989	0.978363	1.53566	1.55649
simsample466	-53.25	4726100	3.37245	2.78772	0.00398849	0.00398849	5.81015	5.75911	0.10863	5	3.25947	3.11489	3.45265	3.3987	3.78352	3.98024	3.53799	3.64518	3.56913	2.97819	3.89682	3.81151	3.76383	3.67974	3.91955	4.12641	2.26873	2.40249	3.00662	2.44755	1.73243	2.18495	2.2902	1.82267	1.94884	1.43766	1.42306	1.34086	1.44294	1.27463	1.10261	1.11869	1.17805	0.982728	1.10188	1.26448	0.959843	1.51181	1.52792
simsample467	-50.9	4886800	3.38273	2.84327	0.00398355	0.00398355	5.7656	5.66369	0.107142	5	3.29176	3.1484	3.48529	3.42911	3.81884	4.01343	3.57343	3.68122	3.60368	3.0121	3.93514	3.84697	3.80142	3.71441	3.95841	4.16349	2.28881	2.42069	3.02922	2.46597	1.74733	2.20246	2.30664	1.83543	1.96178	1.44796	1.43273	1.35028	1.45245	1.28349	1.1103	1.12662	1.18605	0.989624	1.10928	1.27171	0.966033	1.52009	1.53569
simsample468	-59.8	5484030	3.41548	2.49926	0.00404407	0.00404407	5.96177	5.75449	0.130198	5	3.12649	2.9467	3.32595	3.28542	3.60963	3.88081	3.38349	3.50222	3.44714	2.8171	3.74285	3.70493	3.62215	3.57877	3.77599	4.03678	2.24278	2.40519	3.00448	2.45317	1.71124	2.16841	2.28945	1.81613	1.94514	1.42894	1.42266	1.33565	1.44176	1.26623	1.08949	1.10059	1.16168	0.964977	1.08375	1.25108	0.93727	1.48281	1.50285
simsample469	-46.9	4995120	3.39302	2.67504	0.00384124	0.00384124	6.08768	5.78058	0.0795117	5	3.66039	3.56659	3.85823	3.74981	4.26616	4.36597	3.99081	4.09797	3.98285	3.40343	4.43051	4.23444	4.24646	4.07694	4.42994	4.55948	2.39564	2.49702	3.17535	2.55363	1.82344	2.30907	2.39616	1.88978	2.024	1.48581	1.46162	1.3837	1.48695	1.3187	1.14176	1.16605	1.22617	1.02232	1.14883	1.30958	1.00053	1.59009	1.59613
simsample470	-52.25	4323880	3.33201	2.75707	0.00390276	0.00390276	5.85957	5.92497	0.0992122	5	3.38711	3.25767	3.58299	3.51967	3.94831	4.1106	3.68291	3.78686	3.69794	3.10972	4.05666	3.94	3.90895	3.80028	4.07092	4.25454	2.31431	2.44047	3.0645	2.48725	1.76867	2.23112	2.33314	1.85765	1.98719	1.46544	1.44719	1.36578	1.46923	1.30046	1.12747	1.14669	1.20698	1.00789	1.1305	1.29605	0.988143	1.55931	1.5739
simsample471	-54.15	5008050	3.39624	2.60126	0.00388096	0.00388096	6.13785	5.75524	0.0847	5	3.5377	3.43578	3.73292	3.63185	4.11946	4.23661	3.85398	3.96132	3.85459	3.27739	4.28178	4.104	4.10574	3.95176	4.28397	4.42534	2.3315	2.43769	3.09793	2.49315	1.7743	2.24914	2.33829	1.84338	1.97512	1.44857	1.42686	1.34964	1.45146	1.28555	1.11191	1.13448	1.19366	0.994362	1.11786	1.27638	0.972391	1.54707	1.55423
simsample472	-52.7	4326550	3.3306	2.73202	0.00393369	0.00393369	5.78749	5.9871	0.107224	5	3.32939	3.18543	3.52712	3.47453	3.87627	4.06634	3.61567	3.72192	3.64165	3.04105	3.97878	3.88624	3.84002	3.75042	3.99836	4.20387	2.30833	2.44511	3.06067	2.49034	1.76474	2.22589	2.33417	1.86088	1.99052	1.46831	1.45266	1.36914	1.47384	1.30267	1.12853	1.14582	1.20677	1.00731	1.1297	1.29786	0.986793	1.55577	1.57294
simsample473	-54.45	4421550	3.33353	2.67912	0.00394233	0.00394233	5.93112	5.99456	0.1131	5	3.3017	3.14699	3.5018	3.45503	3.84011	4.05117	3.58245	3.69139	3.61683	3.00399	3.94276	3.86524	3.8084	3.73109	3.96565	4.18733	2.3105	2.45572	3.0695	2.50076	1.76639	2.22928	2.34254	1.86781	1.99838	1.47342	1.45981	1.37454	1.48067	1.30702	1.13125	1.14723	1.20893	1.00843	1.13118	1.30175	0.987067	1.55673	1.57559
simsample474	-52.05	4336850	3.34733	2.82279	0.0039053	0.0039053	6.02488	6.1265	0.101215	5	3.4224	3.28669	3.62074	3.55921	3.98353	4.15781	3.71954	3.8261	3.73893	3.14042	4.09404	3.98486	3.94904	3.84522	4.11185	4.30497	2.35243	2.48189	3.11135	2.5285	1.79744	2.26547	2.36962	1.88735	2.01791	1.48941	1.47149	1.38824	1.49299	1.32119	1.14499	1.16368	1.22474	1.02282	1.1467	1.31417	1.00153	1.57761	1.59285
simsample475	-54.4	4280450	3.31439	2.76709	0.00394054	0.00394054	5.92844	5.78108	0.101684	5	3.34371	3.2108	3.53886	3.48237	3.90007	4.06782	3.63462	3.73713	3.65135	3.0644	3.99764	3.89081	3.85474	3.75365	4.01323	4.20228	2.29755	2.42676	3.04139	2.47175	1.75733	2.21525	2.3192	1.84996	1.97861	1.46025	1.44264	1.36097	1.46426	1.29591	1.12416	1.14277	1.20299	1.00499	1.12689	1.29316	0.98612	1.55443	1.57032
simsample476	-61.15	5621780	3.43056	2.48325	0.0040224	0.0040224	6.08901	5.69136	0.119044	5	3.2096	3.04747	3.40756	3.34905	3.7087	3.94628	3.47832	3.59611	3.52984	2.91184	3.85946	3.78758	3.72493	3.65529	3.88569	4.11858	2.25	2.39734	3.01213	2.44825	1.71373	2.17424	2.2862	1.80688	1.93597	1.41982	1.41014	1.32623	1.43052	1.25826	1.08281	1.09646	1.15654	0.960523	1.07949	1.24248	0.933141	1.48052	1.49645
simsample477	-47.3	4841160	3.37388	2.71394	0.00384124	0.00384124	6.05592	5.70961	0.0808714	5	3.61669	3.52075	3.81311	3.71229	4.219	4.32116	3.94298	4.04772	3.93517	3.35984	4.36891	4.18244	4.19035	4.0278	4.36953	4.50265	2.37825	2.4814	3.149	2.536	1.8123	2.2924	2.38069	1.88184	2.01488	1.481	1.45709	1.37918	1.48201	1.31466	1.13931	1.16325	1.22318	1.02059	1.14632	1.30747	0.999958	1.58657	1.59381
simsample478	-48	4367820	3.34849	2.80759	0.00385628	0.00385628	5.69435	5.96707	0.0841901	5	3.55066	3.44849	3.74537	3.65792	4.1451	4.2565	3.86953	3.97132	3.86421	3.29236	4.27253	4.1057	4.10468	3.95625	4.27683	4.41984	2.3601	2.46728	3.11784	2.51823	1.80156	2.27368	2.36465	1.87647	2.00757	1.47926	1.456	1.37747	1.47986	1.31314	1.13949	1.16248	1.22225	1.0211	1.14569	1.30784	1.0017	1.58369	1.59315
simsample479	-57.55	4924230	3.40816	2.85969	0.0040258	0.0040258	5.80828	5.78787	0.107757	5	3.23952	3.09684	3.42972	3.37201	3.75146	3.94838	3.51571	3.62382	3.5488	2.96508	3.87538	3.79032	3.7447	3.66032	3.90007	4.1044	2.25548	2.38486	2.98533	2.43018	1.72044	2.16909	2.27094	1.80445	1.92838	1.42288	1.40828	1.32703	1.42726	1.2607	1.08948	1.10507	1.16328	0.970098	1.08737	1.24576	0.945173	1.48705	1.50175
simsample480	-51.05	4426750	3.36059	2.76324	0.0038768	0.0038768	5.85173	6.08871	0.0908811	5	3.49952	3.38403	3.69589	3.61522	4.07795	4.21568	3.8094	3.91452	3.81531	3.23126	4.20736	4.06064	4.04654	3.9143	4.21658	4.37909	2.35164	2.46716	3.11233	2.51758	1.79439	2.26587	2.36148	1.87357	2.00468	1.47645	1.45561	1.37555	1.47876	1.31019	1.13544	1.15669	1.21684	1.01573	1.13985	1.30319	0.994912	1.57309	1.58421
simsample481	-52.9	4236080	3.31736	2.75612	0.00393468	0.00393468	5.8015	5.97638	0.109564	5	3.30843	3.16047	3.5064	3.45979	3.85311	4.04958	3.59173	3.69732	3.61959	3.01725	3.94659	3.86303	3.81194	3.72902	3.96786	4.17959	2.30711	2.44725	3.05719	2.49093	1.76504	2.22441	2.33491	1.86471	1.99406	1.47225	1.45711	1.37282	1.47787	1.30613	1.13206	1.14882	1.21	1.01046	1.1328	1.30237	0.990443	1.55943	1.5779
simsample482	-50.3	4447970	3.35018	2.75504	0.00388437	0.00388437	5.85215	5.86268	0.0834043	5	3.53339	3.43384	3.72705	3.63698	4.12571	4.23315	3.85133	3.95281	3.84511	3.27696	4.25727	4.08602	4.08731	3.93624	4.25989	4.3988	2.34022	2.44593	3.0954	2.4976	1.7858	2.25591	2.34572	1.85944	1.99016	1.46502	1.44187	1.36428	1.46602	1.30067	1.12831	1.15143	1.21078	1.01109	1.13496	1.29574	0.991878	1.57059	1.57945
simsample483	-47.05	4383050	3.33673	2.77215	0.00387021	0.00387021	5.64363	5.90544	0.0904073	5	3.50632	3.39184	3.70315	3.62564	4.09223	4.22543	3.8178	3.92102	3.82071	3.23737	4.21123	4.06412	4.0503	3.91752	4.21937	4.38051	2.35637	2.47264	3.11682	2.52226	1.79986	2.27139	2.36792	1.88189	2.01348	1.48395	1.46261	1.38233	1.48603	1.31725	1.14277	1.16442	1.22491	1.02313	1.1479	1.31298	1.00377	1.58616	1.59794
simsample484	-53.3	4177820	3.29878	2.77799	0.00394035	0.00394035	5.93437	5.84022	0.112934	5	3.25824	3.10564	3.45539	3.41701	3.79635	4.0006	3.53553	3.63967	3.56593	2.96462	3.87764	3.80658	3.74912	3.67578	3.90092	4.11994	2.28992	2.43401	3.03268	2.47538	1.75345	2.20764	2.32061	1.85746	1.98568	1.46761	1.45333	1.36853	1.47343	1.30196	1.1291	1.14501	1.20613	1.00774	1.12926	1.29975	0.988559	1.55399	1.57411
simsample485	-53.5	4377630	3.31809	2.60585	0.00395368	0.00395368	5.7634	5.88489	0.108907	5	3.31562	3.16966	3.51491	3.46232	3.8635	4.05684	3.60035	3.7073	3.62775	3.022	3.96774	3.87449	3.82623	3.73757	3.98557	4.19368	2.29548	2.43572	3.05322	2.48199	1.75482	2.21728	2.3277	1.85415	1.98508	1.46174	1.44693	1.36336	1.46888	1.2973	1.12341	1.14065	1.202	1.00253	1.1253	1.29486	0.982762	1.55386	1.57142
simsample486	-51.35	4301350	3.30682	2.76805	0.00388694	0.00388694	6.08869	5.70399	0.095165	5	3.43325	3.31105	3.62959	3.56419	4.0109	4.15642	3.73609	3.83749	3.74314	3.15887	4.11214	3.98324	3.95934	3.84083	4.12279	4.29564	2.33014	2.45292	3.08238	2.4998	1.78231	2.24728	2.34791	1.87145	2.00198	1.47698	1.45699	1.376	1.47981	1.31123	1.13842	1.15897	1.21954	1.01918	1.14303	1.30988	1.00123	1.57994	1.59408
simsample487	-51.8	4567610	3.3456	2.73983	0.00394841	0.00394841	5.7831	5.84641	0.113045	5	3.28058	3.12648	3.47861	3.4323	3.81209	4.02345	3.55919	3.66771	3.59425	2.98683	3.91521	3.8406	3.78384	3.70826	3.9395	4.16054	2.30028	2.44356	3.05196	2.48794	1.75835	2.21748	2.32924	1.85745	1.98643	1.4657	1.45211	1.36729	1.47231	1.29983	1.1249	1.14054	1.20161	1.00254	1.12412	1.29267	0.980497	1.54423	1.56279
simsample488	-50.1	5132190	3.40728	2.59336	0.00386819	0.00386819	6.06943	5.97357	0.095727	5	3.54423	3.41705	3.7469	3.65834	4.11622	4.27992	3.85412	3.96852	3.8726	3.26181	4.27749	4.13278	4.11154	3.9829	4.28904	4.46788	2.38523	2.50845	3.17391	2.56344	1.81554	2.30073	2.4004	1.89479	2.02964	1.48933	1.47077	1.38861	1.4945	1.32095	1.1409	1.16113	1.22255	1.01772	1.14374	1.30901	0.993169	1.57738	1.58795
simsample489	-52.85	4329230	3.33412	2.76221	0.00390276	0.00390276	5.86818	5.90364	0.0928717	5	3.4441	3.32632	3.63914	3.56629	4.01862	4.1588	3.74865	3.8512	3.75487	3.17472	4.13346	3.99596	3.97738	3.85241	4.14312	4.30925	2.32488	2.44308	3.07648	2.49154	1.77612	2.24132	2.33868	1.85961	1.98962	1.46651	1.44621	1.36629	1.46911	1.30171	1.1291	1.14992	1.20988	1.01049	1.13367	1.29763	0.99126	1.56598	1.57847
simsample490	-56.55	4491140	3.33784	2.67749	0.00398536	0.00398536	5.78958	5.8218	0.109818	5	3.27035	3.12385	3.46648	3.41533	3.80479	4.00182	3.55015	3.65679	3.58005	2.98169	3.91033	3.82393	3.77417	3.69025	3.93067	4.14001	2.27361	2.41202	3.01989	2.45727	1.73758	2.19363	2.30233	1.83397	1.9624	1.4463	1.43195	1.34902	1.45286	1.28308	1.11063	1.12712	1.18749	0.990534	1.1113	1.27775	0.969635	1.5304	1.54773
simsample491	-53.1	4453690	3.36997	2.79996	0.00390179	0.00390179	5.98628	6.15045	0.0962995	5	3.447	3.321	3.64338	3.57077	4.01012	4.16871	3.74861	3.85531	3.7632	3.17342	4.13583	4.00915	3.98396	3.86695	4.1503	4.32871	2.34356	2.46504	3.10085	2.51382	1.78835	2.25658	2.35548	1.87065	2.00069	1.47473	1.45567	1.37436	1.47767	1.3081	1.13292	1.15256	1.21274	1.01221	1.1354	1.29914	0.990212	1.5628	1.5755
simsample492	-62.25	5612220	3.42843	2.46563	0.0040224	0.0040224	6.1126	5.70639	0.122465	5	3.17643	3.00927	3.37457	3.32062	3.66909	3.9167	3.4409	3.55914	3.49641	2.87537	3.81676	3.75432	3.68586	3.62384	3.84472	4.0855	2.24025	2.39188	3.00174	2.44228	1.70689	2.16577	2.2802	1.80314	1.9321	1.41702	1.40851	1.32397	1.4286	1.25578	1.08034	1.09321	1.15343	0.957743	1.07636	1.24013	0.93021	1.47561	1.49256
simsample493	-52.45	4465460	3.34766	2.71285	0.00392607	0.00392607	5.84264	5.9039	0.0968994	5	3.40702	3.28197	3.60268	3.5322	3.96981	4.12551	3.70569	3.81061	3.71901	3.13245	4.08978	3.96274	3.93706	3.8209	4.10197	4.27875	2.3126	2.43533	3.06565	2.48398	1.76572	2.23008	2.32976	1.85083	1.98072	1.45876	1.44012	1.3596	1.46266	1.29455	1.12157	1.14129	1.20131	1.00249	1.12506	1.28898	0.982131	1.55279	1.56593
simsample494	-55.95	4904310	3.38985	2.91026	0.00405219	0.00405219	5.72411	5.71045	0.123142	5	3.12319	2.95533	3.3154	3.28253	3.61145	3.85575	3.3824	3.49211	3.43295	2.83216	3.71201	3.67472	3.60098	3.5535	3.74678	3.99013	2.24582	2.39531	2.9735	2.43618	1.71699	2.16029	2.27416	1.81642	1.93974	1.43497	1.4249	1.33943	1.44182	1.27101	1.09816	1.11014	1.16957	0.9757	1.09242	1.25633	0.95015	1.48814	1.50843
simsample495	-49.75	4395950	3.34612	2.78622	0.00391516	0.00391516	5.6633	5.92781	0.0946097	5	3.42961	3.30825	3.6245	3.55321	3.99724	4.14533	3.73142	3.83508	3.74122	3.15909	4.114	3.98306	3.96103	3.84092	4.1259	4.29743	2.32428	2.44388	3.07487	2.49196	1.77511	2.23949	2.33748	1.85843	1.98792	1.46563	1.44595	1.36563	1.46833	1.30057	1.12756	1.14776	1.20763	1.00847	1.13122	1.29476	0.988313	1.56019	1.57296
simsample496	-54.45	4951800	3.41024	2.76979	0.00394618	0.00394618	5.96589	5.91023	0.0999217	5	3.37985	3.24831	3.57411	3.50056	3.91959	4.09389	3.67239	3.78217	3.696	3.1065	4.06017	3.94382	3.9131	3.80489	4.07826	4.26498	2.30948	2.43227	3.0608	2.48168	1.75963	2.2228	2.32133	1.83876	1.96673	1.44798	1.43084	1.34999	1.45186	1.28348	1.10921	1.12727	1.18644	0.988902	1.10959	1.26955	0.964282	1.52299	1.53514
simsample497	-51.8	4461750	3.32323	2.64743	0.00397289	0.00397289	5.71598	5.84398	0.119675	5	3.21849	3.05466	3.41794	3.38104	3.74185	3.97096	3.48888	3.59779	3.53052	2.91522	3.83585	3.77761	3.70959	3.64787	3.86202	4.09786	2.27895	2.43172	3.03138	2.4748	1.74329	2.19992	2.31747	1.85061	1.98001	1.46022	1.44885	1.36275	1.46891	1.2952	1.12064	1.13498	1.19665	0.997985	1.11938	1.2908	0.976786	1.5396	1.5606
simsample498	-54.2	5638450	3.43403	2.49733	0.00396723	0.00396723	5.87979	5.66814	0.106097	5	3.35126	3.2093	3.5497	3.47174	3.87954	4.07715	3.63818	3.75469	3.67359	3.06445	4.04495	3.93233	3.89317	3.79143	4.06293	4.26431	2.29116	2.42319	3.06139	2.47701	1.74272	2.21219	2.3155	1.82511	1.95588	1.433	1.41898	1.33734	1.44104	1.27027	1.09425	1.11114	1.171	0.972984	1.094	1.25507	0.946486	1.50495	1.51701
simsample499	-49.8	4213270	3.32811	2.82726	0.00385591	0.00385591	6.00436	6.02759	0.0871896	5	3.54795	3.4391	3.7447	3.6651	4.14473	4.26583	3.86526	3.96686	3.86246	3.28305	4.25995	4.1043	4.09623	3.95604	4.26636	4.41938	2.37511	2.48787	3.13624	2.53738	1.81502	2.28856	2.38337	1.89569	2.02764	1.49563	1.47285	1.39277	1.49652	1.32778	1.15298	1.17554	1.23613	1.03326	1.15884	1.32431	1.01459	1.60171	1.61296
simsample500	-49.05	4348500	3.34357	2.81532	0.00388731	0.00388731	5.67546	5.9194	0.0893994	5	3.47474	3.36316	3.66865	3.59088	4.05386	4.18304	3.78369	3.88557	3.78566	3.21145	4.17258	4.02567	4.01373	3.88083	4.18095	4.33802	2.33398	2.44701	3.08399	2.49589	1.78248	2.24836	2.34259	1.86173	1.99136	1.46831	1.44683	1.36763	1.46975	1.30319	1.13063	1.15214	1.21173	1.01234	1.13552	1.29793	0.992838	1.56765	1.57893
[truncated: 1,423 more columns]
