# Supplementary material for: Epidemiological and ecological determinants of Zika virus transmission in an urban setting
Source: eLife journal article supplement (doi:10.7554/elife.29820), 2017-09-05
Supplement: supp [file elife-29820-supp-v1.zip › elife_poa_e29820_Supplementary_File_6.csv]

header	tintro	K	eta	alpha	zeta	zetaprime	HlatP	HinfP	rho	IHintro	ts1	ts2	ts3	ts4	ts5	ts6	ts7	ts8	ts9	ts10	ts11	ts12	ts13	ts14	ts15	ts16	ts17	ts18	ts19	ts20	ts21	ts22	ts23	ts24	ts25	ts26	ts27	ts28	ts29	ts30	ts31	ts32	ts33	ts34	ts35	ts36	ts37	ts38	ts39
simsample1	-49.1	4900160	3.35839	2.80197	0.00398432	0.00398432	5.79904	5.48953	0.113306	5	3.25054	3.09377	3.44368	3.4038	3.77297	3.98466	3.52593	3.63371	3.56326	2.96439	3.8791	3.80974	3.75593	3.67838	3.90892	4.12782	2.28755	2.42946	3.03079	2.47271	1.74656	2.20006	2.30991	1.84579	1.97256	1.45741	1.44302	1.35731	1.46165	1.28997	1.11652	1.13139	1.1926	0.995074	1.11492	1.28016	0.971513	1.5293	1.54798
simsample2	-49.55	4318300	3.33389	2.80804	0.00389786	0.00389786	5.74635	5.82588	0.0839898	5	3.51342	3.41124	3.70196	3.61631	4.10758	4.21302	3.82805	3.92613	3.81525	3.25586	4.22525	4.05602	4.05822	3.91739	4.23255	4.37497	2.33876	2.44713	3.08755	2.49478	1.7864	2.25538	2.34016	1.85828	1.98651	1.46594	1.44158	1.36514	1.46503	1.29997	1.12837	1.15213	1.21267	1.0128	1.13577	1.29588	0.995663	1.572	1.583
simsample3	-50.2	4356360	3.33936	2.68315	0.00390111	0.00390111	5.72086	6.00187	0.0903269	5	3.49456	3.38256	3.69204	3.6174	4.08705	4.21765	3.81045	3.9172	3.81342	3.22804	4.20514	4.05258	4.03803	3.90333	4.21032	4.37	2.33974	2.45551	3.09891	2.50155	1.78298	2.25589	2.34901	1.86633	1.99694	1.47239	1.45146	1.37146	1.47553	1.30763	1.13069	1.15259	1.21324	1.01209	1.13717	1.30194	0.993698	1.57122	1.58473
simsample4	-49.55	4851880	3.3833	2.78982	0.00395052	0.00395052	5.86732	5.79775	0.105133	5	3.34844	3.20745	3.5429	3.48262	3.88746	4.07539	3.63434	3.74264	3.65948	3.06109	4.00333	3.90794	3.86531	3.77021	4.0233	4.22854	2.31173	2.44292	3.06254	2.49103	1.76279	2.22073	2.32668	1.84845	1.9757	1.4569	1.44136	1.35945	1.46428	1.29389	1.11923	1.13631	1.19613	0.998839	1.12039	1.28331	0.975123	1.53678	1.55283
simsample5	-54.15	4825880	3.36924	2.83354	0.00404658	0.00404658	5.80459	5.56018	0.112775	5	3.19829	3.04904	3.38943	3.34348	3.71638	3.91966	3.46765	3.57566	3.50898	2.91926	3.81543	3.74432	3.69085	3.61967	3.84423	4.06221	2.25204	2.39043	2.98312	2.43245	1.72122	2.1704	2.27569	1.81299	1.93626	1.42948	1.4139	1.33184	1.43477	1.26718	1.09573	1.11092	1.17044	0.977154	1.09374	1.25487	0.951889	1.49682	1.51375
simsample6	-53.3	4794220	3.38255	2.80539	0.00397457	0.00397457	5.85231	5.83005	0.109259	5	3.28732	3.14157	3.47977	3.43059	3.81826	4.01692	3.57207	3.67996	3.60379	3.00501	3.93421	3.84797	3.80115	3.71314	3.9526	4.15993	2.29137	2.42625	3.03627	2.47064	1.75061	2.21139	2.32127	1.84852	1.97356	1.45549	1.43977	1.35561	1.45663	1.2883	1.11362	1.12968	1.1896	0.992095	1.11309	1.27601	0.968719	1.5249	1.53889
simsample7	-54.65	4325070	3.32342	2.79917	0.00395825	0.00395825	5.83469	5.90025	0.116224	5	3.23928	3.07599	3.43147	3.3914	3.76346	3.98294	3.51213	3.62273	3.55269	2.94483	3.85379	3.79892	3.74022	3.66949	3.88993	4.12452	2.29938	2.44738	3.04314	2.4863	1.7591	2.21276	2.32544	1.85981	1.98753	1.46962	1.45598	1.3702	1.47625	1.30276	1.12781	1.14379	1.20465	1.00504	1.12706	1.29686	0.983874	1.54314	1.56369
simsample8	-55.35	4142180	3.29657	2.75754	0.00394062	0.00394062	5.9017	5.88843	0.113216	5	3.25908	3.10379	3.45047	3.41376	3.79813	3.99681	3.53294	3.63985	3.56752	2.96428	3.87864	3.81168	3.75169	3.67801	3.90114	4.11955	2.28809	2.43178	3.02829	2.47358	1.75209	2.20889	2.32065	1.85887	1.98703	1.46989	1.45364	1.3664	1.47309	1.30089	1.12887	1.14669	1.20563	1.00731	1.13022	1.29958	0.988387	1.55371	1.57569
simsample9	-50.1	4351510	3.32679	2.69045	0.00388535	0.00388535	5.94592	5.95512	0.0993295	5	3.43043	3.30111	3.63559	3.56904	4.01181	4.17383	3.73848	3.84231	3.74857	3.15123	4.11973	3.99883	3.9631	3.8491	4.12508	4.30761	2.33954	2.46991	3.10442	2.51906	1.79061	2.25998	2.36295	1.87975	2.00663	1.47896	1.4612	1.37971	1.48082	1.30975	1.13578	1.15756	1.21823	1.01711	1.14176	1.3072	0.998029	1.57671	1.59274
simsample10	-54.2	4486630	3.36163	2.77272	0.00392494	0.00392494	6.05473	6.16386	0.109637	5	3.35687	3.20333	3.55718	3.50142	3.90244	4.10653	3.64458	3.75755	3.67957	3.06857	4.01109	3.91977	3.86943	3.78817	4.03623	4.24508	2.33998	2.48073	3.10321	2.52772	1.78932	2.25828	2.36554	1.88539	2.01429	1.48828	1.47087	1.38558	1.49301	1.31727	1.13917	1.15577	1.21953	1.01692	1.13966	1.30731	0.99482	1.56621	1.58466
simsample11	-55.05	4445330	3.35497	2.817	0.00398969	0.00398969	5.76266	6.01678	0.112865	5	3.26121	3.10775	3.45784	3.41135	3.79091	4.00619	3.54753	3.64919	3.57938	2.97676	3.89217	3.81816	3.76025	3.68542	3.91039	4.12708	2.28933	2.4339	3.03344	2.47702	1.75251	2.21113	2.31898	1.85299	1.9819	1.46507	1.44771	1.36357	1.46784	1.29698	1.12212	1.13724	1.19635	0.998823	1.11955	1.28521	0.974039	1.53268	1.55179
simsample12	-52.3	4387730	3.34853	2.69719	0.00392495	0.00392495	5.75566	6.12806	0.104634	5	3.37075	3.22512	3.5637	3.50315	3.92036	4.10622	3.66152	3.76708	3.68373	3.08452	4.03402	3.93158	3.89086	3.79424	4.05086	4.25472	2.32082	2.4523	3.07757	2.49703	1.77027	2.23312	2.33881	1.86119	1.9935	1.47159	1.45544	1.3728	1.47811	1.3052	1.13083	1.14784	1.20933	1.00913	1.13046	1.29702	0.986075	1.55497	1.57224
simsample13	-56.9	4811580	3.36118	2.78446	0.00408376	0.00408376	5.65303	5.51264	0.123532	5	3.0689	2.9038	3.25984	3.22605	3.55311	3.79589	3.32237	3.42765	3.36707	2.77423	3.64898	3.60342	3.53163	3.47895	3.67259	3.90891	2.19577	2.34356	2.91193	2.38242	1.67968	2.11706	2.22983	1.78454	1.90725	1.41108	1.40155	1.3172	1.41864	1.25059	1.0796	1.09198	1.14906	0.957546	1.07198	1.23328	0.934072	1.46571	1.48643
simsample14	-52.6	5665070	3.43359	2.51852	0.003975	0.003975	5.90214	5.65118	0.109095	5	3.33083	3.18612	3.52962	3.45645	3.85728	4.06182	3.61259	3.73051	3.65241	3.04258	4.01559	3.91349	3.86576	3.77504	4.03989	4.2468	2.29518	2.43141	3.06339	2.48193	1.74603	2.21082	2.31913	1.83164	1.96148	1.43831	1.42324	1.34229	1.44525	1.27402	1.09643	1.11384	1.17503	0.976202	1.09553	1.25633	0.947112	1.50391	1.51924
simsample15	-51.9	4750910	3.37277	2.81186	0.0039701	0.0039701	5.78162	5.73934	0.101423	5	3.35722	3.22578	3.55256	3.48511	3.89691	4.06681	3.63992	3.74265	3.66332	3.08052	4.01544	3.90566	3.87162	3.77037	4.03409	4.22213	2.30247	2.42994	3.04886	2.48184	1.76188	2.22004	2.32127	1.84513	1.97369	1.45738	1.44144	1.35947	1.46274	1.29218	1.11913	1.13722	1.1981	1.00063	1.1227	1.28351	0.977469	1.54071	1.55543
simsample16	-47.55	4971250	3.39247	2.63609	0.0038431	0.0038431	6.01969	5.82499	0.0798097	5	3.65461	3.56129	3.85172	3.74102	4.25957	4.35902	3.98323	4.09259	3.98023	3.39968	4.43031	4.23386	4.24593	4.07581	4.42529	4.55587	2.38972	2.49373	3.17245	2.54853	1.81968	2.30738	2.39493	1.88868	2.02	1.48609	1.46255	1.38417	1.4875	1.32016	1.14076	1.16409	1.222	1.02046	1.14675	1.30762	0.999648	1.58899	1.5958
simsample17	-55.95	4896310	3.38831	2.9082	0.00405219	0.00405219	5.72411	5.71045	0.123142	5	3.12607	2.95791	3.3193	3.28461	3.61749	3.86059	3.38547	3.49218	3.43368	2.83413	3.71572	3.67921	3.60883	3.55979	3.74957	3.99059	2.24887	2.4002	2.97558	2.43843	1.71816	2.16109	2.2732	1.81833	1.94184	1.43811	1.42839	1.3422	1.44423	1.27458	1.10064	1.11255	1.17142	0.977679	1.09393	1.25694	0.95146	1.49247	1.51212
simsample18	-50.05	4196690	3.3182	2.80424	0.00385577	0.00385577	6.0735	6.04856	0.0931533	5	3.52328	3.40094	3.72416	3.6493	4.11461	4.26068	3.83428	3.9365	3.84071	3.25087	4.23053	4.09387	4.06858	3.94048	4.23411	4.40406	2.38605	2.50589	3.15567	2.55539	1.82421	2.29961	2.3954	1.90891	2.04217	1.5075	1.48511	1.40375	1.50851	1.33753	1.16244	1.18161	1.2444	1.04065	1.16617	1.33476	1.02187	1.61087	1.62219
simsample19	-51	4400100	3.31287	2.66011	0.00394142	0.00394142	5.67412	5.6349	0.0962753	5	3.3834	3.25796	3.5744	3.5033	3.94526	4.09493	3.67561	3.77771	3.68025	3.10131	4.04868	3.9235	3.90435	3.78016	4.06605	4.24724	2.29448	2.41785	3.04133	2.46072	1.74837	2.2067	2.30646	1.83666	1.96336	1.44774	1.43079	1.35104	1.45435	1.28835	1.11662	1.13718	1.2001	1.00031	1.12329	1.28427	0.981038	1.55111	1.56742
simsample20	-49.05	5084750	3.38561	2.60082	0.00388208	0.00388208	6.18056	5.81922	0.0989409	5	3.51412	3.37775	3.71708	3.63933	4.09286	4.26633	3.82685	3.93736	3.84762	3.2329	4.23723	4.10316	4.07143	3.95257	4.24585	4.43827	2.38639	2.51698	3.1728	2.56739	1.81534	2.3014	2.40752	1.90388	2.03437	1.49283	1.47726	1.39583	1.50309	1.3274	1.14667	1.16712	1.22949	1.02305	1.15034	1.31966	1.00165	1.58663	1.59752
simsample21	-51.15	4419940	3.33399	2.74447	0.00390276	0.00390276	5.87894	5.83997	0.0992401	5	3.39664	3.26795	3.5966	3.53123	3.95933	4.12251	3.69613	3.80059	3.70946	3.1253	4.07541	3.95703	3.92482	3.81221	4.08794	4.26636	2.32189	2.44863	3.07107	2.49644	1.77374	2.23762	2.33744	1.86453	1.99279	1.47177	1.45168	1.37042	1.47443	1.30518	1.1286	1.14731	1.20675	1.00902	1.13071	1.29718	0.989689	1.56256	1.57856
simsample22	-50.3	4389100	3.34712	2.78825	0.00391516	0.00391516	5.65736	5.92711	0.0946097	5	3.41883	3.29698	3.60999	3.53775	3.98333	4.13482	3.72277	3.824	3.7291	3.14846	4.09707	3.96616	3.94882	3.83197	4.1153	4.28249	2.31661	2.43228	3.05981	2.48053	1.76866	2.23098	2.32839	1.85238	1.98184	1.45944	1.43902	1.36101	1.46276	1.29593	1.12354	1.14331	1.2021	1.00514	1.12388	1.28517	0.981102	1.54847	1.56344
simsample23	-56.65	4447550	3.35078	2.72107	0.00396122	0.00396122	5.74095	5.99165	0.110497	5	3.26775	3.12044	3.46465	3.41016	3.79316	3.99622	3.54713	3.65866	3.58446	2.98534	3.90938	3.82551	3.77244	3.68857	3.92378	4.1407	2.27645	2.41338	3.0201	2.45779	1.74009	2.19598	2.30184	1.8364	1.96211	1.44716	1.43481	1.35097	1.45446	1.28372	1.11089	1.12754	1.18671	0.990244	1.11051	1.2767	0.969899	1.53026	1.54639
simsample24	-53.45	4219950	3.32149	2.79661	0.00390596	0.00390596	6.00572	5.81773	0.0887846	5	3.43789	3.33025	3.63074	3.55442	4.01747	4.13955	3.74659	3.84587	3.74457	3.18043	4.1264	3.97961	3.97033	3.83439	4.13688	4.28517	2.30526	2.42023	3.04807	2.46296	1.7598	2.21904	2.31091	1.84016	1.96824	1.45165	1.42996	1.35251	1.45239	1.28884	1.12004	1.14253	1.20319	1.00506	1.12656	1.28732	0.985901	1.55668	1.56703
simsample25	-54.65	4827900	3.35405	2.81391	0.00405626	0.00405626	5.74967	5.3987	0.117349	5	3.13155	2.97362	3.32044	3.28393	3.63632	3.86026	3.40029	3.50214	3.43307	2.84295	3.72434	3.66873	3.60321	3.55005	3.75758	3.97666	2.21958	2.36179	2.94015	2.40259	1.69798	2.13543	2.24403	1.79432	1.91594	1.4159	1.40549	1.3214	1.42172	1.25252	1.0855	1.10083	1.15934	0.968884	1.084	1.24454	0.944364	1.48391	1.50551
simsample26	-54.65	4442040	3.34012	2.73375	0.00398532	0.00398532	5.72097	5.98459	0.121004	5	3.20257	3.03476	3.39788	3.36398	3.71227	3.94565	3.46232	3.57049	3.50713	2.89282	3.80314	3.75318	3.681	3.6267	3.82791	4.06636	2.27214	2.42608	3.02176	2.47103	1.74467	2.19885	2.31466	1.84952	1.97488	1.46169	1.45004	1.36458	1.46952	1.29899	1.12141	1.13615	1.19754	0.998761	1.12049	1.2891	0.978681	1.53571	1.55906
simsample27	-56.85	5271090	3.41842	2.71532	0.00398115	0.00398115	6.14939	5.79358	0.114239	5	3.27751	3.12194	3.47892	3.42037	3.79464	4.0162	3.55376	3.66961	3.59833	2.9868	3.9225	3.84612	3.78839	3.7184	3.95449	4.18204	2.29798	2.44197	3.05783	2.48613	1.75359	2.2175	2.32779	1.84539	1.9748	1.45648	1.44268	1.35718	1.46035	1.28765	1.10935	1.12234	1.18172	0.985091	1.10519	1.26852	0.957456	1.51182	1.52808
simsample28	-47.4	4458090	3.36087	2.84135	0.0038768	0.0038768	5.79608	6.06007	0.090172	5	3.54263	3.42725	3.73543	3.65517	4.12692	4.26514	3.85841	3.96168	3.86066	3.28038	4.26118	4.11069	4.09761	3.96731	4.2682	4.42858	2.38551	2.50028	3.1488	2.55111	1.81821	2.29318	2.38614	1.89961	2.03127	1.49677	1.47245	1.39088	1.49666	1.32501	1.14897	1.17103	1.23323	1.0307	1.15617	1.32198	1.00943	1.58876	1.60159
simsample29	-52.25	4807340	3.34892	2.76752	0.00400665	0.00400665	5.76967	5.48763	0.117856	5	3.17688	3.01335	3.3651	3.32793	3.68797	3.90775	3.44203	3.55091	3.48721	2.88713	3.78245	3.72868	3.6678	3.60261	3.81708	4.04743	2.25297	2.4006	2.98842	2.44124	1.72388	2.17043	2.27977	1.82188	1.94955	1.44309	1.42958	1.34727	1.44812	1.2776	1.10332	1.11758	1.17817	0.983211	1.10241	1.26712	0.961007	1.51056	1.53139
simsample30	-61.6	5499150	3.4181	2.52793	0.0040445	0.0040445	6.07447	5.7392	0.130717	5	3.11663	2.93716	3.31551	3.27813	3.60224	3.8741	3.37436	3.49095	3.43568	2.80659	3.72579	3.68719	3.6032	3.56428	3.75943	4.02514	2.24045	2.4013	2.99883	2.44988	1.71085	2.16416	2.28875	1.82032	1.94738	1.43024	1.42397	1.33532	1.44296	1.26814	1.09002	1.10096	1.16292	0.965727	1.08334	1.24877	0.935834	1.47774	1.49914
simsample31	-52.8	5229770	3.42252	2.66288	0.00391472	0.00391472	6.09201	5.90998	0.102624	5	3.41827	3.281	3.61226	3.53781	3.95669	4.14523	3.707	3.82241	3.7354	3.13399	4.11596	3.99738	3.96183	3.85679	4.12928	4.31786	2.33266	2.46206	3.10517	2.51692	1.77902	2.25226	2.35578	1.86399	1.99386	1.46656	1.44971	1.36839	1.47227	1.30073	1.12087	1.13812	1.19966	0.999075	1.12343	1.28622	0.974091	1.54066	1.55516
simsample32	-57.45	4704730	3.36212	2.81492	0.00401277	0.00401277	5.93539	5.56528	0.103347	5	3.2617	3.12812	3.453	3.39477	3.79825	3.97452	3.54992	3.65168	3.56649	2.99344	3.89869	3.80191	3.76447	3.67279	3.92499	4.11686	2.25039	2.37657	2.97853	2.4218	1.71969	2.17012	2.26827	1.80407	1.9309	1.42218	1.4066	1.32395	1.42496	1.26247	1.09212	1.11117	1.17162	0.977413	1.09422	1.25439	0.95453	1.50222	1.51815
simsample33	-52.1	4737210	3.34413	2.76822	0.00401374	0.00401374	5.73775	5.5251	0.117578	5	3.18145	3.02104	3.37401	3.33466	3.69741	3.91928	3.45454	3.56238	3.49082	2.89404	3.79752	3.73655	3.66693	3.60582	3.81769	4.04661	2.2525	2.39845	2.9869	2.44188	1.72231	2.16933	2.27941	1.81943	1.94581	1.43742	1.42448	1.34047	1.4455	1.27638	1.10494	1.11919	1.17961	0.985323	1.10434	1.26988	0.963517	1.51609	1.53614
simsample34	-52.1	4745920	3.39817	2.82675	0.00390558	0.00390558	5.98164	5.92879	0.0874543	5	3.49186	3.38068	3.68081	3.59098	4.05438	4.17827	3.79332	3.90183	3.79912	3.22879	4.20098	4.04403	4.04182	3.899	4.21042	4.36467	2.3362	2.44421	3.09056	2.49572	1.78007	2.24742	2.33882	1.84978	1.97858	1.45956	1.43531	1.35673	1.45596	1.291	1.11743	1.14007	1.19776	1.00055	1.12143	1.27901	0.976183	1.54411	1.55339
simsample35	-56.45	5226740	3.409	2.68062	0.00398355	0.00398355	6.12612	5.79517	0.119115	5	3.23468	3.06713	3.4303	3.38052	3.74097	3.9801	3.50684	3.62239	3.55642	2.93727	3.86839	3.81178	3.74779	3.68075	3.90404	4.14365	2.29295	2.43817	3.05109	2.48649	1.74657	2.20893	2.32025	1.84537	1.9709	1.45444	1.44359	1.35804	1.46158	1.2889	1.10873	1.12111	1.18281	0.986157	1.10538	1.27008	0.95665	1.50818	1.52623
simsample36	-51.65	4862370	3.36474	2.81342	0.00405419	0.00405419	5.60166	5.56197	0.122308	5	3.13265	2.97141	3.32979	3.29387	3.63807	3.87454	3.40038	3.51145	3.44625	2.84536	3.73387	3.68739	3.61595	3.56617	3.76393	4.00536	2.24534	2.39773	2.97616	2.43539	1.71869	2.16462	2.28025	1.82255	1.9445	1.43883	1.42702	1.33946	1.44057	1.27119	1.09717	1.10976	1.16889	0.975508	1.09345	1.25884	0.953174	1.49394	1.51786
simsample37	-52.15	4182510	3.29004	2.75868	0.00393385	0.00393385	5.98795	5.79217	0.109754	5	3.31182	3.16393	3.51143	3.46802	3.86169	4.05493	3.59433	3.70144	3.62331	3.01871	3.94765	3.86584	3.81629	3.73301	3.97269	4.18197	2.31536	2.45677	3.06522	2.49669	1.77382	2.23258	2.34281	1.87371	2.0009	1.47912	1.46396	1.3786	1.48499	1.31366	1.13821	1.15462	1.21717	1.0174	1.14005	1.31137	0.999077	1.57057	1.5935
simsample38	-51.1	4318590	3.33344	2.76066	0.00392169	0.00392169	5.75003	5.94207	0.0966678	5	3.41603	3.29053	3.61023	3.54402	3.9842	4.13746	3.71563	3.8199	3.72906	3.13905	4.08988	3.95873	3.93662	3.82597	4.10313	4.28224	2.32471	2.45012	3.07891	2.49024	1.77077	2.23488	2.33075	1.8569	1.98584	1.46587	1.44707	1.36389	1.46951	1.30251	1.12784	1.14772	1.20857	1.01125	1.13474	1.29684	0.98955	1.56289	1.57777
simsample39	-50.35	4918770	3.38018	2.82344	0.00401067	0.00401067	5.61269	5.62061	0.11187	5	3.24031	3.08866	3.4309	3.38285	3.75982	3.96915	3.51588	3.62157	3.55092	2.95389	3.86999	3.7914	3.73929	3.66724	3.90251	4.11485	2.27708	2.41545	3.01526	2.45731	1.73636	2.18659	2.29075	1.82369	1.9486	1.44064	1.42594	1.34379	1.44741	1.27813	1.10474	1.12102	1.18198	0.984976	1.10278	1.26502	0.959576	1.51093	1.53048
simsample40	-51	5585650	3.42604	2.50181	0.00395068	0.00395068	5.8197	5.6471	0.104459	5	3.37813	3.23417	3.56967	3.48634	3.90035	4.0986	3.66575	3.78405	3.70113	3.09181	4.07709	3.95536	3.91772	3.81116	4.09003	4.28835	2.30227	2.43453	3.07735	2.48861	1.75235	2.22499	2.32667	1.8367	1.96863	1.44362	1.42885	1.34562	1.44999	1.28192	1.10403	1.12165	1.18283	0.981271	1.10171	1.26384	0.953633	1.51488	1.52846
simsample41	-51.7	4328140	3.33967	2.78454	0.00393468	0.00393468	5.65317	5.97481	0.101667	5	3.35599	3.22092	3.55123	3.49012	3.90953	4.07785	3.64882	3.7556	3.66764	3.08071	4.01672	3.91337	3.87705	3.77479	4.0373	4.22511	2.30617	2.43751	3.05835	2.48479	1.76416	2.22715	2.33016	1.85726	1.98569	1.46446	1.44845	1.36506	1.47065	1.30006	1.12574	1.14461	1.20339	1.00435	1.12647	1.29004	0.982945	1.54822	1.5661
simsample42	-51.15	4277740	3.30735	2.76672	0.00388896	0.00388896	6.13562	5.76346	0.095332	5	3.44456	3.31971	3.63913	3.57389	4.02842	4.17528	3.75418	3.85395	3.75688	3.16807	4.1244	3.9954	3.97031	3.8488	4.12737	4.30147	2.33378	2.4587	3.09249	2.5092	1.78909	2.25418	2.35567	1.87895	2.01027	1.48339	1.46383	1.38183	1.48739	1.3182	1.14206	1.16187	1.22454	1.02273	1.14641	1.31336	1.00359	1.5843	1.6
simsample43	-54.05	4372470	3.35148	2.81852	0.00393909	0.00393909	5.78756	6.04434	0.108166	5	3.29697	3.15103	3.48941	3.43631	3.82795	4.01865	3.5759	3.68152	3.60417	3.00999	3.93518	3.84973	3.79827	3.71289	3.94698	4.15809	2.2913	2.42747	3.03488	2.47542	1.75654	2.2139	2.31501	1.84917	1.97561	1.45845	1.44333	1.35929	1.46116	1.2954	1.12075	1.13601	1.19698	0.999815	1.11738	1.28321	0.97627	1.53656	1.55526
simsample44	-47.95	4376850	3.32271	2.67632	0.00389475	0.00389475	5.60519	5.92284	0.101495	5	3.42404	3.28695	3.61897	3.55594	3.99058	4.16163	3.72223	3.8328	3.74529	3.14125	4.10931	3.99003	3.954	3.84973	4.12244	4.31493	2.34489	2.4779	3.11397	2.52577	1.79329	2.26144	2.36639	1.88309	2.01658	1.48718	1.46921	1.38661	1.49144	1.31947	1.14186	1.16148	1.22077	1.01973	1.1433	1.31019	0.998135	1.57484	1.59455
simsample45	-56.7	4191950	3.30578	2.77884	0.00395107	0.00395107	5.93359	5.83992	0.109606	5	3.26887	3.12532	3.46762	3.42445	3.81467	4.0094	3.55084	3.65557	3.57602	2.98381	3.88917	3.81355	3.7629	3.67877	3.91302	4.12019	2.28065	2.42076	3.01882	2.46134	1.74543	2.19812	2.30654	1.84438	1.97014	1.45931	1.44421	1.35831	1.46172	1.29284	1.12049	1.13858	1.19816	1.00241	1.12231	1.2892	0.984264	1.54712	1.56688
simsample46	-55.9	4127370	3.29586	2.8247	0.00394916	0.00394916	6.04095	5.85403	0.111176	5	3.27723	3.12644	3.47141	3.43103	3.82553	4.01925	3.55703	3.65861	3.58429	2.99088	3.89881	3.82026	3.76526	3.68643	3.91311	4.13204	2.30139	2.44053	3.04062	2.48092	1.76303	2.21934	2.32691	1.86394	1.99121	1.47423	1.45886	1.37469	1.47953	1.30602	1.13427	1.14931	1.21188	1.01273	1.13453	1.30199	0.994156	1.56116	1.5826
simsample47	-50.95	5107750	3.41619	2.60595	0.0038615	0.0038615	6.14759	5.95964	0.0845514	5	3.61392	3.50861	3.81274	3.7072	4.20575	4.32959	3.94077	4.05185	3.94127	3.3562	4.38389	4.2013	4.19669	4.03948	4.38268	4.52473	2.38264	2.48823	3.16344	2.54651	1.81007	2.29575	2.38606	1.8765	2.01304	1.47768	1.45658	1.37808	1.47811	1.30981	1.13049	1.15705	1.21737	1.0117	1.1368	1.29633	0.987215	1.57079	1.57818
simsample48	-54.1	5670340	3.43243	2.53175	0.003975	0.003975	5.93975	5.66842	0.113857	5	3.29692	3.13945	3.49117	3.42626	3.80451	4.03127	3.57408	3.68626	3.61502	2.99822	3.9621	3.87848	3.8194	3.73763	3.98823	4.21135	2.29432	2.43982	3.07119	2.49053	1.74918	2.21818	2.3239	1.83662	1.9654	1.44361	1.42965	1.3463	1.44997	1.27712	1.0982	1.11257	1.17324	0.975576	1.09828	1.25993	0.947621	1.50252	1.5165
simsample49	-45.25	4603290	3.36577	2.74841	0.00384464	0.00384464	5.69721	5.87209	0.0755811	5	3.66526	3.5805	3.8604	3.75082	4.27415	4.35697	3.99722	4.10463	3.98411	3.41341	4.42339	4.21956	4.23733	4.06348	4.42528	4.53948	2.38888	2.48821	3.15951	2.54016	1.82079	2.30161	2.38438	1.88769	2.01823	1.48364	1.45959	1.38121	1.4836	1.32018	1.14462	1.17119	1.22996	1.02819	1.15475	1.31382	1.00835	1.59934	1.60286
simsample50	-52.3	4498500	3.3451	2.73224	0.00393409	0.00393409	5.85685	5.88155	0.105145	5	3.34272	3.20153	3.53671	3.47922	3.88752	4.07172	3.62769	3.73353	3.64903	3.05597	3.99547	3.90002	3.85816	3.76498	4.01483	4.21299	2.30631	2.44063	3.05999	2.4902	1.76532	2.22872	2.33452	1.85775	1.98349	1.4622	1.44447	1.36275	1.46606	1.2953	1.12138	1.13924	1.20039	1.00151	1.1225	1.28965	0.981089	1.54608	1.56421
simsample51	-58.55	4442620	3.3479	2.66095	0.00394591	0.00394591	5.91655	6.06595	0.113064	5	3.26928	3.11766	3.46739	3.42099	3.80524	4.01705	3.54853	3.65591	3.58263	2.97805	3.91355	3.83756	3.77571	3.6992	3.9316	4.1527	2.28476	2.42401	3.03521	2.47043	1.74569	2.20528	2.31633	1.84621	1.97314	1.4542	1.44351	1.35678	1.46117	1.28981	1.11498	1.12882	1.19014	0.990437	1.11063	1.27967	0.969267	1.53065	1.54771
simsample52	-57.6	4265160	3.30699	2.7433	0.00392139	0.00392139	6.17325	5.78567	0.102993	5	3.35204	3.2149	3.546	3.49077	3.90851	4.07996	3.6417	3.74742	3.66272	3.06828	4.00547	3.90644	3.87039	3.77386	4.02928	4.22156	2.30813	2.44234	3.05806	2.48781	1.76816	2.22637	2.33265	1.86422	1.99154	1.46977	1.45279	1.36844	1.47294	1.30247	1.12907	1.14882	1.21109	1.01241	1.13428	1.30142	0.99194	1.56097	1.57918
simsample53	-52.8	4415210	3.31411	2.61874	0.00395368	0.00395368	5.7451	5.8089	0.114536	5	3.26319	3.10594	3.45802	3.41374	3.80029	4.00987	3.54025	3.65428	3.58396	2.97488	3.90247	3.82527	3.76196	3.68728	3.91059	4.13857	2.28465	2.43215	3.04014	2.48113	1.75166	2.21225	2.32773	1.86028	1.98751	1.46322	1.44851	1.3635	1.47207	1.29883	1.12222	1.13935	1.19941	1.00213	1.12588	1.29483	0.981555	1.54965	1.56855
simsample54	-50.1	4338550	3.32657	2.77127	0.00391252	0.00391252	5.82093	5.83414	0.0957206	5	3.42313	3.30281	3.62018	3.5536	3.99811	4.14092	3.72316	3.82838	3.73296	3.14831	4.09588	3.96909	3.94902	3.83146	4.11182	4.28604	2.32487	2.44779	3.07521	2.49059	1.77833	2.24088	2.33941	1.86377	1.99474	1.47225	1.45058	1.37069	1.47326	1.30503	1.13037	1.15082	1.21116	1.0118	1.1318	1.29599	0.992405	1.5669	1.58214
simsample55	-48.4	4357210	3.31605	2.65849	0.00388831	0.00388831	5.63441	5.82567	0.0945592	5	3.46552	3.3472	3.66321	3.59069	4.05111	4.19353	3.77047	3.87809	3.77966	3.18588	4.16101	4.02455	4.00447	3.88268	4.17778	4.34921	2.34337	2.46743	3.11018	2.51519	1.79065	2.25957	2.35926	1.87263	2.00773	1.4788	1.45743	1.37674	1.47975	1.31172	1.13703	1.15923	1.21959	1.01846	1.14156	1.30889	0.998124	1.58194	1.59587
simsample56	-49.95	5112470	3.40408	2.61559	0.0038709	0.0038709	6.14154	5.95982	0.0981394	5	3.52029	3.39219	3.72869	3.64247	4.09619	4.26749	3.8345	3.95077	3.8583	3.24154	4.2495	4.1099	4.08556	3.95914	4.25253	4.43573	2.3787	2.50722	3.16674	2.56545	1.8161	2.29724	2.3995	1.89668	2.03089	1.49151	1.47104	1.3893	1.49488	1.3219	1.14051	1.16093	1.22345	1.01897	1.14505	1.31002	0.992759	1.57278	1.58773
simsample57	-50.65	5032720	3.3893	2.60584	0.00387301	0.00387301	6.15457	5.76414	0.0880392	5	3.5622	3.45003	3.75611	3.66563	4.15143	4.27949	3.87486	3.98772	3.88494	3.29515	4.31069	4.14413	4.13836	3.99016	4.311	4.46702	2.36594	2.47733	3.14401	2.53495	1.79895	2.27899	2.37353	1.8741	2.00723	1.47369	1.45384	1.37278	1.47668	1.30597	1.13015	1.15174	1.21322	1.01062	1.13584	1.29657	0.988836	1.57016	1.58134
simsample58	-50.6	4320410	3.33389	2.75829	0.00392169	0.00392169	5.74373	5.96376	0.0965141	5	3.42836	3.30227	3.62442	3.55573	3.99564	4.14609	3.72746	3.83101	3.73875	3.15518	4.11302	3.98309	3.95658	3.84092	4.12629	4.3056	2.3345	2.45619	3.08594	2.50449	1.78271	2.24832	2.3484	1.86705	1.99787	1.47464	1.45293	1.37489	1.47944	1.30863	1.13367	1.15354	1.21477	1.01708	1.14075	1.30644	0.996915	1.57572	1.59196
simsample59	-49.55	4967770	3.37135	2.75853	0.0039339	0.0039339	5.9571	5.61002	0.108025	5	3.34097	3.19424	3.53889	3.48074	3.88176	4.07732	3.62487	3.73465	3.6542	3.05326	3.9913	3.90348	3.85603	3.76912	4.01786	4.2263	2.31875	2.45753	3.07479	2.50411	1.77274	2.234	2.34232	1.86564	1.99309	1.47072	1.45272	1.36988	1.4738	1.30133	1.12726	1.14558	1.20501	1.00656	1.12697	1.29052	0.980019	1.54422	1.56268
simsample60	-48.9	4343160	3.34124	2.8144	0.00389185	0.00389185	5.63922	5.85097	0.0855227	5	3.48992	3.38923	3.68306	3.59588	4.07398	4.1897	3.79926	3.89341	3.78692	3.22755	4.18605	4.02626	4.02677	3.88173	4.19335	4.33743	2.32156	2.4291	3.06579	2.4808	1.77512	2.23849	2.32529	1.84771	1.97618	1.45762	1.43479	1.35958	1.46135	1.29573	1.12393	1.14683	1.20518	1.00759	1.1315	1.2905	0.989491	1.5629	1.57571
simsample61	-52.6	4845100	3.3823	2.8202	0.00398355	0.00398355	5.79718	5.72235	0.109619	5	3.26293	3.1144	3.4534	3.40241	3.78784	3.994	3.55203	3.66033	3.58036	2.98519	3.90279	3.81981	3.76676	3.68188	3.91633	4.1306	2.27802	2.41314	3.02063	2.45863	1.73643	2.18783	2.29324	1.8281	1.95241	1.442	1.42764	1.34469	1.44697	1.27975	1.10603	1.12151	1.18081	0.98608	1.10346	1.26483	0.959823	1.5092	1.53035
simsample62	-51.7	4793550	3.34731	2.79754	0.00403799	0.00403799	5.7762	5.47873	0.120003	5	3.15695	2.99473	3.34847	3.31915	3.66606	3.898	3.42289	3.52441	3.45893	2.85926	3.75267	3.70039	3.63426	3.57451	3.77484	4.0091	2.24191	2.39291	2.97577	2.4343	1.71916	2.16564	2.27365	1.8213	1.94516	1.44014	1.42796	1.3411	1.44386	1.27657	1.1043	1.11948	1.1801	0.984637	1.10384	1.26969	0.961148	1.50714	1.52943
simsample63	-55.1	4396610	3.36484	2.80283	0.00388164	0.00388164	6.01909	6.07324	0.088135	5	3.48964	3.38166	3.68388	3.60076	4.06905	4.19372	3.79395	3.899	3.79422	3.22487	4.18945	4.03802	4.03372	3.89726	4.20301	4.35673	2.3347	2.44571	3.08678	2.49479	1.78009	2.24637	2.33829	1.85492	1.98453	1.463	1.44049	1.36281	1.46694	1.3004	1.12488	1.14769	1.20733	1.00726	1.13055	1.29255	0.987169	1.55643	1.56631
simsample64	-51.1	5091910	3.38788	2.62061	0.00388208	0.00388208	6.17797	5.77373	0.100503	5	3.46617	3.33109	3.66993	3.58889	4.02705	4.20859	3.77002	3.88348	3.79013	3.17988	4.16412	4.04364	4.01309	3.90623	4.18626	4.37478	2.35786	2.4879	3.13782	2.54171	1.7993	2.27967	2.38165	1.8841	2.01815	1.48311	1.46359	1.38168	1.48652	1.31168	1.13148	1.15241	1.21368	1.01086	1.13599	1.30118	0.988141	1.56609	1.58312
simsample65	-50.25	4187840	3.29591	2.80036	0.00389695	0.00389695	6.01868	5.70535	0.0912865	5	3.45991	3.34395	3.65342	3.58842	4.05384	4.18311	3.7703	3.87233	3.76907	3.19423	4.14875	4.00721	3.99236	3.86395	4.14684	4.30885	2.32955	2.4471	3.07696	2.49365	1.78227	2.24586	2.34749	1.87625	2.00657	1.48249	1.46045	1.38018	1.48139	1.31349	1.14139	1.16298	1.22335	1.0236	1.14572	1.30968	1.00446	1.58359	1.59396
simsample66	-47.7	4569650	3.38452	2.8102	0.00384663	0.00384663	5.82007	6.03063	0.0740585	5	3.66426	3.58022	3.84996	3.73977	4.26853	4.34819	3.99478	4.09697	3.97524	3.41724	4.42201	4.215	4.23968	4.06315	4.42598	4.53953	2.38698	2.47941	3.1526	2.53381	1.81924	2.29533	2.37561	1.878	2.00925	1.48109	1.45723	1.3801	1.48051	1.31556	1.14115	1.16498	1.22322	1.02315	1.14705	1.30521	1.00145	1.58574	1.58994
simsample67	-53.9	4385920	3.33399	2.82731	0.00396448	0.00396448	5.93391	5.90242	0.114832	5	3.25258	3.09619	3.44061	3.40272	3.77221	3.98799	3.52667	3.63357	3.55979	2.95746	3.86965	3.80682	3.74588	3.67498	3.89203	4.11735	2.2938	2.44022	3.037	2.48098	1.75715	2.21174	2.32089	1.8584	1.98549	1.46782	1.4554	1.37042	1.47209	1.30259	1.12865	1.14521	1.20635	1.00675	1.12739	1.29521	0.982993	1.54184	1.56305
simsample68	-55.05	4937180	3.4143	2.82721	0.00395052	0.00395052	5.95797	5.92317	0.100538	5	3.36539	3.22566	3.55331	3.48539	3.89802	4.08047	3.66056	3.76581	3.68502	3.10035	4.04663	3.93545	3.90336	3.79203	4.06407	4.24833	2.30649	2.4261	3.05152	2.47751	1.75758	2.22081	2.3164	1.83722	1.96666	1.45214	1.43639	1.35398	1.45589	1.28741	1.11186	1.12988	1.19113	0.992824	1.1122	1.27201	0.966729	1.52372	1.534
simsample69	-50.35	5221370	3.42467	2.66982	0.00390647	0.00390647	6.06378	5.88472	0.0894685	5	3.55609	3.44051	3.75283	3.652	4.12591	4.27211	3.87334	3.98547	3.88004	3.28973	4.29819	4.13974	4.12861	3.98492	4.30297	4.46295	2.36912	2.48341	3.14369	2.53551	1.80258	2.28317	2.37618	1.87314	2.00254	1.4712	1.44939	1.36947	1.47501	1.3061	1.12666	1.14921	1.20721	1.00676	1.13055	1.28894	0.980141	1.55485	1.56408
simsample70	-48	4999830	3.39529	2.62323	0.0038431	0.0038431	6.00828	5.82084	0.0831731	5	3.60661	3.50101	3.79957	3.69909	4.20162	4.31531	3.92688	4.03387	3.92301	3.3443	4.36218	4.17754	4.18331	4.02728	4.36508	4.50667	2.37252	2.48036	3.14798	2.52979	1.80195	2.29026	2.37681	1.87261	2.00638	1.47095	1.44752	1.37163	1.47498	1.30784	1.13226	1.15638	1.21593	1.01179	1.13795	1.29833	0.989192	1.57671	1.58249
simsample71	-52.8	4787300	3.35096	2.80619	0.00403799	0.00403799	5.76267	5.47127	0.116382	5	3.17229	3.01634	3.36327	3.32228	3.68466	3.89846	3.43855	3.54601	3.47722	2.88173	3.77553	3.71244	3.65191	3.58838	3.79881	4.03204	2.24445	2.39208	2.97752	2.43281	1.7203	2.16261	2.27513	1.81965	1.9421	1.43578	1.4223	1.33835	1.43938	1.27313	1.10087	1.11575	1.17686	0.981384	1.09772	1.2601	0.956044	1.50508	1.52581
simsample72	-49.65	4334210	3.32106	2.78481	0.00391252	0.00391252	5.74956	5.84267	0.100924	5	3.39916	3.26708	3.59165	3.53258	3.96302	4.1309	3.69421	3.79598	3.71158	3.11941	4.06478	3.95222	3.91753	3.81453	4.08809	4.27777	2.3369	2.46698	3.09011	2.50999	1.78521	2.25329	2.35377	1.87827	2.00457	1.48198	1.46395	1.38229	1.48627	1.31625	1.13924	1.16156	1.22165	1.02117	1.14472	1.31344	1.00284	1.57742	1.5944
simsample73	-52.75	4608020	3.37482	2.81854	0.00395106	0.00395106	5.81813	6.00162	0.106912	5	3.32913	3.18394	3.5252	3.46802	3.86639	4.06173	3.62202	3.72867	3.64572	3.04861	3.98347	3.89246	3.84507	3.75528	4.00552	4.21416	2.31175	2.44648	3.06441	2.49418	1.76624	2.22561	2.33266	1.85761	1.98669	1.46528	1.44859	1.365	1.46747	1.29792	1.12169	1.13862	1.19903	0.998842	1.11854	1.28387	0.975791	1.53561	1.5543
simsample74	-52.95	4344000	3.35714	2.83206	0.00390792	0.00390792	6.0296	6.099	0.0948692	5	3.43557	3.31388	3.62868	3.55573	3.99904	4.15218	3.73963	3.84298	3.75117	3.16716	4.12116	3.99223	3.96995	3.85254	4.13472	4.30867	2.33542	2.45726	3.08879	2.50496	1.7874	2.25314	2.34793	1.867	1.9926	1.47304	1.45319	1.36882	1.46983	1.30305	1.12816	1.1486	1.20758	1.01001	1.13233	1.2944	0.989719	1.56268	1.57746
simsample75	-56.8	4733360	3.37938	2.78649	0.00400266	0.00400266	5.84399	5.7266	0.0998206	5	3.31008	3.17935	3.49359	3.42769	3.84322	4.01291	3.59985	3.70277	3.6182	3.03859	3.96455	3.85111	3.8206	3.72062	3.97911	4.15801	2.25893	2.38161	2.99365	2.42843	1.72244	2.17244	2.26892	1.80595	1.9306	1.42358	1.40525	1.32723	1.42716	1.26285	1.09295	1.11116	1.16891	0.975595	1.0923	1.24977	0.952695	1.5028	1.51345
simsample76	-55.35	4178290	3.30165	2.78789	0.00395078	0.00395078	6.04641	5.87364	0.111184	5	3.28469	3.13543	3.48215	3.44654	3.83161	4.03226	3.5715	3.67538	3.5999	2.99567	3.9138	3.83698	3.78175	3.69867	3.93488	4.15117	2.30193	2.44551	3.04625	2.48645	1.76267	2.21386	2.32254	1.85732	1.98769	1.46962	1.4548	1.37088	1.47593	1.30443	1.13191	1.14843	1.20934	1.00944	1.13184	1.30379	0.993734	1.56149	1.58346
simsample77	-57	4846200	3.37568	2.85631	0.00404658	0.00404658	5.82364	5.591	0.116625	5	3.15644	3.00047	3.35033	3.31339	3.66606	3.88203	3.42419	3.52959	3.46456	2.87153	3.7572	3.70358	3.64702	3.58401	3.79461	4.01648	2.23753	2.3782	2.95753	2.41893	1.70875	2.15335	2.26225	1.80666	1.92934	1.42763	1.41426	1.33096	1.43009	1.2628	1.09184	1.10785	1.16704	0.97457	1.09294	1.25232	0.949237	1.49128	1.50989
simsample78	-56.15	4202390	3.32051	2.79217	0.00391545	0.00391545	6.05059	5.91321	0.0969189	5	3.38765	3.2614	3.57967	3.51341	3.95037	4.10257	3.6873	3.78773	3.70239	3.11921	4.05817	3.93512	3.90756	3.7959	4.07435	4.24979	2.31304	2.43523	3.05696	2.47939	1.76772	2.22577	2.32403	1.85591	1.98211	1.46419	1.44323	1.3608	1.46352	1.29559	1.1243	1.14609	1.20761	1.008	1.12898	1.29329	0.987479	1.55547	1.57015
simsample79	-47.1	4344320	3.33785	2.81245	0.00386701	0.00386701	5.75155	5.97155	0.0909801	5	3.51501	3.40156	3.71737	3.63819	4.10727	4.24472	3.83212	3.9326	3.83612	3.24731	4.21836	4.07545	4.05904	3.92878	4.23465	4.39227	2.36746	2.48346	3.12405	2.53097	1.80703	2.28053	2.37566	1.89278	2.02375	1.49338	1.47339	1.39215	1.49647	1.32452	1.15023	1.1717	1.23335	1.03052	1.15396	1.31826	1.00894	1.5919	1.6054
simsample80	-51.35	4952750	3.39427	2.8507	0.0039877	0.0039877	5.82403	5.69032	0.105637	5	3.30538	3.16038	3.49436	3.43488	3.8335	4.02295	3.59358	3.70005	3.62008	3.02791	3.95206	3.85811	3.81769	3.72727	3.97748	4.18035	2.29214	2.42009	3.03474	2.4678	1.74762	2.20274	2.30571	1.83384	1.95736	1.44577	1.42938	1.34713	1.4497	1.28202	1.10873	1.1264	1.18522	0.990521	1.10908	1.2695	0.965408	1.51958	1.53542
simsample81	-52.9	4398360	3.33109	2.82644	0.00396448	0.00396448	5.94369	5.91166	0.118765	5	3.23754	3.0757	3.43492	3.40133	3.75689	3.98365	3.50574	3.61781	3.55002	2.94362	3.85258	3.79054	3.72345	3.66957	3.87968	4.11707	2.30336	2.45472	3.04827	2.49072	1.7608	2.21587	2.32831	1.86595	1.99337	1.47675	1.46446	1.37499	1.47907	1.30617	1.13276	1.14696	1.20736	1.00806	1.12771	1.298	0.986532	1.54656	1.5679
simsample82	-52.35	4504360	3.34335	2.70502	0.00393409	0.00393409	5.78856	5.86676	0.106334	5	3.32492	3.18768	3.52314	3.4694	3.87626	4.06453	3.62015	3.72903	3.64491	3.04752	3.98448	3.89107	3.84826	3.75114	3.99815	4.19999	2.29761	2.43286	3.04721	2.47819	1.75691	2.21681	2.32005	1.84823	1.97672	1.45752	1.44332	1.36153	1.46679	1.29524	1.12182	1.14074	1.19956	0.998981	1.11752	1.28287	0.97858	1.54305	1.56058
simsample83	-51.8	4384900	3.36256	2.79805	0.00389485	0.00389485	5.75492	6.09906	0.0915232	5	3.46535	3.34636	3.65813	3.58483	4.03569	4.17378	3.77339	3.87816	3.7814	3.20608	4.16902	4.02363	4.00906	3.88011	4.178	4.33736	2.33583	2.45026	3.08567	2.50136	1.78282	2.24776	2.34269	1.85808	1.98838	1.46659	1.44679	1.36671	1.46965	1.30324	1.12968	1.14837	1.20766	1.00895	1.13105	1.29393	0.988355	1.56246	1.57431
simsample84	-52.85	4640950	3.37961	2.80269	0.00395106	0.00395106	5.82089	5.99645	0.104266	5	3.34874	3.20482	3.53926	3.47423	3.88434	4.07165	3.63337	3.74085	3.65577	3.0623	4.0015	3.90159	3.8654	3.77168	4.02777	4.23004	2.31212	2.44158	3.05878	2.48866	1.76547	2.22542	2.32556	1.85287	1.98087	1.462	1.44766	1.36417	1.46671	1.2953	1.11907	1.13581	1.1966	0.998961	1.12025	1.28237	0.976979	1.53666	1.54974
simsample85	-54.7	4387290	3.33959	2.81917	0.00396448	0.00396448	5.91771	5.8903	0.109035	5	3.2799	3.13265	3.47305	3.42459	3.81292	4.01012	3.55882	3.66705	3.59233	2.9962	3.9107	3.83	3.7766	3.69448	3.93095	4.1407	2.28793	2.42597	3.0299	2.4696	1.75031	2.2024	2.31217	1.84698	1.9735	1.45832	1.44378	1.35819	1.46024	1.29289	1.11913	1.13497	1.19635	0.999535	1.11991	1.28631	0.977263	1.53281	1.55146
simsample86	-53.85	5389830	3.43627	2.68685	0.00395988	0.00395988	6.00888	5.7923	0.104204	5	3.35778	3.21776	3.55375	3.47959	3.88222	4.07625	3.64387	3.75842	3.67529	3.07667	4.04036	3.9354	3.89556	3.7983	4.06501	4.26154	2.30328	2.43433	3.06447	2.48504	1.75485	2.2186	2.31848	1.83127	1.95925	1.44319	1.42757	1.34661	1.44905	1.27961	1.10154	1.11939	1.17866	0.98239	1.10308	1.26275	0.956161	1.51415	1.52816
simsample87	-45	4594670	3.36735	2.74417	0.0038218	0.0038218	5.70636	5.86402	0.0683893	5	3.73445	3.66729	3.92164	3.80114	4.36344	4.41918	4.07812	4.18493	4.05438	3.50159	4.5281	4.30121	4.34013	4.14215	4.52724	4.61771	2.40413	2.48871	3.17556	2.54772	1.82942	2.31333	2.39144	1.88843	2.01875	1.48724	1.45842	1.38503	1.48722	1.3225	1.14708	1.17391	1.23199	1.03135	1.15664	1.31505	1.00998	1.60326	1.60528
simsample88	-55.5	4886630	3.36712	2.83053	0.00408376	0.00408376	5.6407	5.54604	0.13052	5	3.0393	2.86423	3.22939	3.21063	3.52128	3.78255	3.29064	3.39817	3.34887	2.74642	3.61292	3.59217	3.50266	3.46815	3.63942	3.89926	2.21207	2.37143	2.93446	2.40908	1.69234	2.13192	2.25139	1.80326	1.92498	1.42454	1.41596	1.32897	1.43318	1.26174	1.09084	1.10025	1.15956	0.967191	1.08309	1.24853	0.941695	1.47215	1.49529
simsample89	-51	5323810	3.42788	2.71715	0.00391708	0.00391708	6.05405	5.86909	0.102419	5	3.44588	3.303	3.64207	3.56516	3.9873	4.17606	3.74175	3.85612	3.76898	3.1593	4.13551	4.02473	3.99017	3.88854	4.16157	4.35816	2.36154	2.49562	3.13976	2.5466	1.80159	2.27445	2.37253	1.87653	2.00565	1.47938	1.46223	1.37789	1.48169	1.3091	1.12781	1.14715	1.20748	1.00482	1.12736	1.28887	0.977249	1.54527	1.55868
simsample90	-56.65	5360110	3.43112	2.6763	0.00395988	0.00395988	6.02561	5.70796	0.0997652	5	3.37273	3.24215	3.5703	3.49167	3.90966	4.08522	3.66646	3.77886	3.69563	3.10021	4.05822	3.93878	3.91111	3.79711	4.08238	4.26785	2.296	2.41745	3.0489	2.46528	1.74576	2.21208	2.30584	1.82315	1.94983	1.43294	1.4186	1.33714	1.43783	1.27215	1.09597	1.114	1.17197	0.976271	1.09613	1.25468	0.951594	1.50749	1.52061
simsample91	-60.8	5348120	3.42798	2.66059	0.00402301	0.00402301	6.08677	5.89016	0.124303	5	3.1793	3.00348	3.37177	3.32861	3.67049	3.92167	3.44052	3.55725	3.50211	2.88003	3.80238	3.75716	3.68382	3.63122	3.83689	4.08329	2.26646	2.42031	3.01906	2.47011	1.73118	2.18663	2.30398	1.83023	1.95699	1.44143	1.43408	1.34687	1.44988	1.27649	1.09962	1.11161	1.173	0.975708	1.09274	1.25751	0.946559	1.49264	1.51084
simsample92	-60.7	5378510	3.43665	2.68102	0.00402301	0.00402301	6.04385	5.89416	0.121583	5	3.18869	3.0223	3.38428	3.33396	3.67983	3.93133	3.45022	3.56961	3.51216	2.89488	3.8131	3.76328	3.69288	3.63707	3.85014	4.08829	2.26275	2.41339	3.01571	2.45919	1.72557	2.1797	2.29027	1.81803	1.94281	1.43161	1.42173	1.33534	1.44108	1.27003	1.09253	1.1047	1.16583	0.970088	1.08718	1.25214	0.942249	1.48387	1.5039
simsample93	-54.4	4844660	3.35782	2.815	0.00403627	0.00403627	5.92589	5.51981	0.120999	5	3.15067	2.98631	3.34369	3.3089	3.64833	3.88321	3.40979	3.51911	3.45256	2.85207	3.7391	3.69308	3.62329	3.57111	3.77114	4.0085	2.24909	2.39844	2.98051	2.43772	1.72086	2.16625	2.27674	1.82065	1.94781	1.44284	1.42955	1.34429	1.445	1.27564	1.10404	1.1158	1.17649	0.982163	1.09917	1.26348	0.957352	1.50361	1.52847
simsample94	-60.9	5362990	3.4443	2.6899	0.00402807	0.00402807	6.02749	5.88878	0.112584	5	3.24433	3.09522	3.43873	3.37653	3.75067	3.97093	3.523	3.63837	3.56472	2.96058	3.89169	3.81399	3.75705	3.67753	3.91538	4.13231	2.26183	2.3992	3.00888	2.44602	1.72478	2.17885	2.28217	1.80836	1.9341	1.42255	1.41104	1.32777	1.42972	1.26171	1.08523	1.1	1.15753	0.963554	1.08019	1.24023	0.936002	1.47766	1.49273
simsample95	-53.05	4368840	3.3464	2.72662	0.00392706	0.00392706	5.74279	6.03033	0.0999965	5	3.37994	3.25232	3.5785	3.51489	3.94374	4.10812	3.67869	3.78891	3.7001	3.10521	4.04983	3.9322	3.90415	3.7977	4.06959	4.25596	2.31079	2.43474	3.05855	2.48347	1.76374	2.22525	2.32743	1.85108	1.97968	1.45945	1.44029	1.35936	1.4622	1.29314	1.12039	1.13992	1.2033	1.00453	1.12568	1.28929	0.983893	1.55219	1.56777
simsample96	-53.9	4468600	3.35339	2.77295	0.00392494	0.00392494	6.02887	6.13802	0.114189	5	3.3226	3.16252	3.52181	3.47562	3.85917	4.07709	3.60357	3.71505	3.64367	3.02724	3.9625	3.88992	3.82873	3.75808	3.98567	4.21531	2.3381	2.4863	3.10263	2.5331	1.78831	2.25464	2.36476	1.88749	2.01885	1.49445	1.47815	1.39158	1.50004	1.32288	1.14379	1.15999	1.21927	1.01682	1.13977	1.31196	0.996038	1.56706	1.58436
simsample97	-52.5	4201860	3.29259	2.79631	0.00392328	0.00392328	5.98476	5.65476	0.101265	5	3.34264	3.20793	3.53073	3.4773	3.90032	4.06225	3.63086	3.7341	3.64763	3.06619	3.99417	3.88736	3.85464	3.75567	4.01135	4.20033	2.30423	2.43136	3.04292	2.47509	1.76256	2.22111	2.32231	1.85403	1.98222	1.46518	1.44822	1.36642	1.46965	1.30086	1.12864	1.14789	1.20871	1.00867	1.13022	1.29653	0.990861	1.56262	1.57902
simsample98	-59.85	5474370	3.40927	2.48384	0.00404269	0.00404269	5.99015	5.7228	0.133059	5	3.09971	2.91515	3.29786	3.25911	3.57667	3.85704	3.35543	3.47341	3.41914	2.78715	3.70474	3.67454	3.58354	3.54585	3.73398	4.00178	2.23075	2.39623	2.99187	2.44951	1.70515	2.15998	2.28335	1.81299	1.94176	1.42924	1.42257	1.33273	1.43939	1.26506	1.08879	1.09866	1.15902	0.961933	1.08085	1.25027	0.935929	1.4795	1.50183
simsample99	-51.2	4949140	3.36982	2.71866	0.0039339	0.0039339	6.04802	5.61766	0.107107	5	3.3387	3.19234	3.53905	3.47781	3.88076	4.07066	3.62361	3.73474	3.65662	3.0539	4.00043	3.90501	3.8608	3.77142	4.02463	4.22964	2.31365	2.44947	3.073	2.49196	1.76197	2.22447	2.32835	1.85355	1.98324	1.464	1.45067	1.36702	1.47014	1.29829	1.12233	1.1399	1.20182	1.00232	1.12621	1.29107	0.979253	1.54386	1.56269
simsample100	-55.75	4431030	3.34089	2.75233	0.00400224	0.00400224	5.6452	5.89118	0.113566	5	3.2311	3.07494	3.42153	3.37663	3.75639	3.96528	3.50767	3.61647	3.54446	2.94624	3.86209	3.79111	3.73352	3.65711	3.88149	4.09705	2.26805	2.41074	3.01298	2.45476	1.73399	2.18837	2.29745	1.83525	1.95967	1.4482	1.43296	1.34771	1.45108	1.27989	1.1078	1.12387	1.18451	0.991859	1.1143	1.28	0.970546	1.52603	1.5461
simsample101	-50.7	4401560	3.33494	2.77881	0.00391036	0.00391036	5.95209	5.84268	0.0935583	5	3.4584	3.33607	3.65264	3.58151	4.03445	4.18154	3.76597	3.86903	3.77281	3.19372	4.15344	4.01893	4.00222	3.87369	4.1626	4.33523	2.34371	2.46112	3.09724	2.50995	1.7884	2.25656	2.35115	1.87208	1.9994	1.47394	1.45482	1.37182	1.47592	1.30717	1.1343	1.15465	1.21311	1.01444	1.13936	1.30501	0.998665	1.5748	1.5893
simsample102	-62.85	5456090	3.43595	2.47071	0.00402428	0.00402428	5.88246	6.00375	0.126783	5	3.15342	2.98121	3.35567	3.30335	3.64256	3.90507	3.41908	3.54042	3.48052	2.85304	3.78908	3.73784	3.66359	3.60871	3.82369	4.0735	2.24571	2.40525	3.00654	2.45225	1.71109	2.16921	2.28735	1.81146	1.93982	1.42191	1.4136	1.32572	1.43178	1.26021	1.08485	1.09635	1.15466	0.959063	1.07694	1.24117	0.93126	1.47663	1.49373
simsample103	-55.1	4451640	3.32533	2.64285	0.0039914	0.0039914	5.70749	5.89527	0.12343	5	3.18354	3.01168	3.38353	3.35373	3.70675	3.94617	3.45114	3.56192	3.49697	2.88187	3.79716	3.75172	3.67273	3.62021	3.8198	4.06526	2.27186	2.43017	3.0291	2.47391	1.74053	2.1949	2.31346	1.85007	1.97821	1.45871	1.44579	1.36159	1.46811	1.29436	1.11812	1.13023	1.19239	0.995272	1.11521	1.28647	0.971946	1.53056	1.55263
simsample104	-54.25	4416160	3.34324	2.72957	0.00389605	0.00389605	6.0602	5.94256	0.0956237	5	3.43809	3.31425	3.62845	3.55961	4.00784	4.15691	3.73885	3.84133	3.74882	3.16213	4.11595	3.98535	3.95807	3.84292	4.13374	4.30757	2.32732	2.45123	3.08725	2.50091	1.7799	2.2487	2.34318	1.86263	1.99444	1.46952	1.45079	1.36996	1.47384	1.30488	1.1295	1.14877	1.20914	1.00985	1.13296	1.29661	0.990019	1.56514	1.57687
simsample105	-54.75	4919680	3.40908	2.90127	0.00402296	0.00402296	5.74569	5.82645	0.11064	5	3.23157	3.08626	3.42439	3.36666	3.73641	3.9476	3.5036	3.6148	3.54097	2.95182	3.85633	3.77532	3.73034	3.65246	3.88469	4.09723	2.26742	2.40145	2.99734	2.44022	1.72925	2.17844	2.28548	1.81724	1.93724	1.43342	1.4195	1.33559	1.43638	1.27135	1.09824	1.11328	1.17227	0.976677	1.09238	1.25069	0.950169	1.49127	1.50768
simsample106	-50.1	4336990	3.30551	2.65386	0.00394142	0.00394142	5.60691	5.66578	0.0958181	5	3.39699	3.27487	3.59136	3.5281	3.9767	4.12425	3.7009	3.80102	3.704	3.12237	4.07296	3.94386	3.91788	3.80192	4.08489	4.25922	2.29707	2.42234	3.04947	2.47346	1.76071	2.2243	2.32453	1.84786	1.97525	1.45526	1.43366	1.35332	1.45601	1.28782	1.11868	1.14048	1.20106	1.00343	1.12684	1.29006	0.986127	1.56146	1.57302
simsample107	-52.05	4404150	3.35906	2.68511	0.00388718	0.00388718	5.7322	6.16989	0.0908851	5	3.50799	3.39257	3.70615	3.62593	4.09698	4.22984	3.82448	3.92976	3.82776	3.24057	4.22506	4.07698	4.06154	3.92576	4.23404	4.39185	2.34996	2.46589	3.11301	2.51841	1.79345	2.26681	2.36003	1.87075	2.00106	1.47192	1.45196	1.37349	1.47749	1.30812	1.13226	1.1548	1.21588	1.01439	1.13738	1.30137	0.993606	1.57296	1.58332
simsample108	-56.15	5325650	3.42995	2.66992	0.00395988	0.00395988	6.10822	5.76521	0.101475	5	3.36785	3.22679	3.55531	3.47786	3.89473	4.07562	3.65348	3.76823	3.68135	3.09042	4.04815	3.93051	3.89651	3.79283	4.06473	4.25181	2.29175	2.41914	3.05137	2.4714	1.74708	2.2097	2.31069	1.82869	1.95773	1.43872	1.42201	1.3397	1.44086	1.27513	1.10017	1.11829	1.17791	0.982192	1.10209	1.25939	0.95507	1.51154	1.52361
simsample109	-56.35	5307770	3.41808	2.70572	0.00398898	0.00398898	6.13881	5.8402	0.12109	5	3.24118	3.07135	3.44021	3.39366	3.74399	3.99232	3.5133	3.62974	3.56855	2.94213	3.87631	3.81904	3.75147	3.7008	3.91217	4.15788	2.3083	2.46564	3.07159	2.50704	1.75896	2.22246	2.33571	1.85673	1.9861	1.46351	1.45355	1.36576	1.47113	1.29548	1.11734	1.12998	1.19236	0.992417	1.11181	1.28049	0.96673	1.52163	1.53837
simsample110	-55.2	4194960	3.30442	2.83474	0.00394785	0.00394785	5.94759	5.73198	0.105789	5	3.27898	3.14203	3.47465	3.43077	3.82709	4.0046	3.55911	3.66154	3.58031	2.997	3.90292	3.81047	3.77212	3.68317	3.92345	4.12035	2.27467	2.40809	3.00775	2.44929	1.74246	2.19288	2.30028	1.84056	1.96514	1.45568	1.44077	1.35842	1.45935	1.29019	1.12055	1.14045	1.20126	1.00549	1.12596	1.28863	0.983001	1.54305	1.56308
simsample111	-49.65	5659370	3.4229	2.47088	0.00392582	0.00392582	5.98212	5.60938	0.099324	5	3.47129	3.33656	3.66846	3.57949	4.02902	4.20572	3.77451	3.89236	3.79927	3.18734	4.19661	4.06161	4.03366	3.91272	4.21021	4.39448	2.34056	2.46399	3.12533	2.52137	1.77743	2.25647	2.35745	1.85662	1.99119	1.45832	1.44091	1.35896	1.46396	1.2942	1.11569	1.13451	1.19557	0.993894	1.11778	1.28008	0.966475	1.53918	1.55125
simsample112	-47.55	4649800	3.36585	2.76747	0.00388828	0.00388828	5.82195	5.87842	0.0907247	5	3.52109	3.40563	3.71721	3.63405	4.09899	4.23844	3.82922	3.93642	3.83742	3.24939	4.23182	4.08542	4.07418	3.94227	4.24986	4.41325	2.36964	2.48637	3.13449	2.53443	1.80793	2.28177	2.37582	1.88497	2.01311	1.48301	1.46339	1.38241	1.48568	1.31747	1.14079	1.16171	1.2215	1.02027	1.14331	1.30719	0.997942	1.57732	1.59231
simsample113	-54.85	4268390	3.31306	2.58558	0.00394147	0.00394147	5.80094	5.99584	0.106539	5	3.3414	3.20086	3.54218	3.48811	3.901	4.09121	3.6397	3.75031	3.66249	3.05559	4.01093	3.91369	3.86574	3.77269	4.02762	4.22609	2.30331	2.43969	3.0592	2.48957	1.76027	2.22691	2.33828	1.86166	1.99143	1.46713	1.45137	1.36795	1.47455	1.30036	1.12433	1.14135	1.20454	1.00414	1.12794	1.29616	0.985089	1.56034	1.57977
simsample114	-52.35	4610500	3.36946	2.77023	0.00391638	0.00391638	5.87569	5.97494	0.100991	5	3.40176	3.26598	3.59638	3.53281	3.96098	4.13615	3.70149	3.81085	3.72543	3.12988	4.08443	3.9656	3.93145	3.83303	4.10077	4.29259	2.33665	2.46188	3.08992	2.50939	1.78221	2.24612	2.34904	1.86649	1.9956	1.47192	1.45597	1.37375	1.47641	1.30828	1.13129	1.14995	1.20988	1.01102	1.13261	1.29716	0.986421	1.55888	1.57445
simsample115	-49.75	4320400	3.32339	2.78804	0.00391174	0.00391174	5.72902	5.81944	0.096832	5	3.4109	3.2922	3.60844	3.5483	3.99084	4.13644	3.7097	3.80997	3.7211	3.13837	4.0805	3.96329	3.93878	3.82453	4.09795	4.27786	2.32445	2.44644	3.07309	2.4959	1.78126	2.24241	2.33998	1.86467	1.99615	1.47212	1.45255	1.37148	1.47368	1.30552	1.13298	1.15253	1.21308	1.01324	1.13467	1.29673	0.990778	1.562	1.57884
simsample116	-57	4401540	3.34592	2.65631	0.00394964	0.00394964	5.82481	5.99179	0.0997057	5	3.36398	3.23435	3.55573	3.49193	3.9251	4.08862	3.66028	3.76415	3.67431	3.08898	4.03938	3.91912	3.88884	3.77344	4.04856	4.23628	2.29069	2.42018	3.04292	2.4685	1.74809	2.21076	2.30901	1.83289	1.96324	1.44315	1.42743	1.34652	1.4491	1.27953	1.10769	1.12811	1.18801	0.99187	1.11198	1.27514	0.972241	1.53661	1.54886
simsample117	-56.6	4176480	3.29764	2.75351	0.00394655	0.00394655	5.95188	5.8742	0.115308	5	3.24736	3.09245	3.44072	3.40938	3.78321	3.99348	3.52375	3.63022	3.55755	2.95509	3.86825	3.80544	3.74128	3.6704	3.89187	4.11121	2.28878	2.43703	3.03347	2.47642	1.75091	2.20563	2.3201	1.85912	1.98998	1.47208	1.45656	1.37525	1.48042	1.30594	1.13057	1.14571	1.20768	1.00889	1.12916	1.29729	0.986001	1.55107	1.57314
simsample118	-58.8	4459960	3.35145	2.663	0.00394591	0.00394591	5.91142	6.05324	0.10887	5	3.30498	3.15854	3.50239	3.44844	3.8448	4.04488	3.59026	3.69666	3.61756	3.01486	3.95348	3.86153	3.81476	3.72865	3.98054	4.19046	2.29516	2.43368	3.05058	2.47972	1.75271	2.21369	2.32304	1.84807	1.97499	1.45531	1.43908	1.35399	1.45865	1.28801	1.11347	1.13038	1.19214	0.993077	1.11182	1.27765	0.970188	1.53323	1.55075
simsample119	-53.2	4751960	3.35334	2.81759	0.00403026	0.00403026	5.81629	5.55773	0.116293	5	3.19018	3.02787	3.38105	3.3435	3.70402	3.92426	3.46164	3.56754	3.49755	2.90155	3.79831	3.73478	3.67164	3.60406	3.81468	4.04007	2.25593	2.40023	2.9958	2.44471	1.72824	2.17916	2.28919	1.83032	1.95443	1.44672	1.43228	1.34889	1.44953	1.28045	1.10783	1.12142	1.18222	0.985828	1.10404	1.27208	0.965253	1.51609	1.53462
simsample120	-49.25	4389280	3.34108	2.70075	0.00389475	0.00389475	5.61727	5.87864	0.0834416	5	3.52865	3.42471	3.71669	3.62713	4.12361	4.22465	3.84473	3.95013	3.83467	3.27397	4.26023	4.08593	4.08648	3.93297	4.25649	4.39856	2.33664	2.44415	3.09395	2.49642	1.78192	2.2522	2.33963	1.85629	1.98331	1.45993	1.4366	1.35896	1.46056	1.30081	1.12943	1.15316	1.21062	1.00914	1.1329	1.29138	0.989895	1.56668	1.57813
simsample121	-55.9	4252750	3.30685	2.7537	0.00394054	0.00394054	5.92754	5.81	0.109027	5	3.29151	3.1449	3.48672	3.44206	3.83971	4.03493	3.58047	3.67974	3.60725	3.00272	3.92252	3.84272	3.79349	3.715	3.95304	4.16125	2.29843	2.43921	3.04159	2.48084	1.75756	2.21382	2.32269	1.85567	1.98465	1.46745	1.45173	1.36857	1.47369	1.30216	1.12734	1.14455	1.20349	1.00599	1.12675	1.29508	0.987167	1.55244	1.57388
simsample122	-56.9	4775010	3.39453	2.79389	0.00396518	0.00396518	6.05182	5.97884	0.101468	5	3.37836	3.24293	3.57398	3.50177	3.92091	4.09514	3.67065	3.77881	3.69243	3.10331	4.05359	3.93963	3.90917	3.80017	4.07189	4.26425	2.31549	2.44131	3.06749	2.49216	1.76857	2.23002	2.32931	1.85001	1.97952	1.45817	1.43938	1.35678	1.45827	1.28996	1.11555	1.1338	1.19502	0.995644	1.11788	1.27736	0.973016	1.53513	1.55067
simsample123	-57.85	4359180	3.32548	2.78486	0.00396426	0.00396426	6.06484	5.85731	0.114308	5	3.24681	3.09326	3.44591	3.40094	3.77884	3.99083	3.52333	3.6254	3.56017	2.95681	3.87028	3.79505	3.7367	3.66366	3.89194	4.11187	2.28649	2.42663	3.02283	2.4689	1.74792	2.20041	2.31491	1.85294	1.97797	1.46378	1.45024	1.36658	1.47101	1.29903	1.12578	1.14008	1.19919	1.00079	1.12216	1.29042	0.981437	1.54178	1.55936
simsample124	-52.8	4799440	3.38251	2.80637	0.0039701	0.0039701	5.7763	5.76241	0.105955	5	3.2924	3.15299	3.48392	3.42586	3.82256	4.01609	3.57967	3.68948	3.60595	3.01437	3.93196	3.83767	3.79908	3.70949	3.95124	4.15734	2.27853	2.41166	3.01735	2.4554	1.73924	2.19004	2.28996	1.82429	1.94983	1.43712	1.42309	1.34102	1.44589	1.27768	1.10522	1.12259	1.18134	0.986485	1.10503	1.26527	0.96235	1.51577	1.53173
simsample125	-51.15	4237200	3.34191	2.83022	0.00385591	0.00385591	5.96523	6.07251	0.0844087	5	3.54889	3.45137	3.74681	3.6621	4.15009	4.26105	3.87134	3.9723	3.86516	3.29309	4.27029	4.1089	4.10819	3.96012	4.28056	4.42128	2.36212	2.47083	3.11914	2.52211	1.80421	2.27418	2.36477	1.87953	2.00582	1.4812	1.45698	1.37927	1.48109	1.31567	1.14238	1.16634	1.22618	1.02498	1.14946	1.31033	1.00259	1.58419	1.59542
simsample126	-49.45	4426930	3.36506	2.8127	0.00390121	0.00390121	5.75797	6.10627	0.0930464	5	3.47439	3.35194	3.66337	3.58838	4.045	4.19135	3.7817	3.88397	3.78649	3.20561	4.16841	4.03256	4.01741	3.8895	4.18191	4.34647	2.34589	2.46622	3.10516	2.51419	1.79221	2.26261	2.35678	1.87217	2.00228	1.47697	1.45809	1.37696	1.47902	1.31064	1.13647	1.15742	1.21907	1.01881	1.1419	1.3014	0.994814	1.57244	1.58433
simsample127	-60.6	5595740	3.4333	2.45135	0.00401672	0.00401672	6.03248	5.90489	0.12707	5	3.18516	3.00832	3.38441	3.33172	3.67047	3.93569	3.44716	3.5696	3.51443	2.87825	3.8277	3.77761	3.70031	3.64732	3.86001	4.11354	2.26774	2.42672	3.03762	2.47177	1.72512	2.18655	2.30965	1.82897	1.95926	1.43802	1.43164	1.34331	1.45003	1.27282	1.09354	1.10599	1.1666	0.966829	1.0868	1.25161	0.938598	1.48689	1.50393
simsample128	-58.8	4443110	3.34779	2.74602	0.00394823	0.00394823	6.06258	5.98105	0.110173	5	3.28785	3.13907	3.47987	3.42627	3.81543	4.01855	3.56288	3.67164	3.59603	2.99879	3.92497	3.84103	3.78875	3.70534	3.94256	4.15509	2.28977	2.42993	3.04091	2.4766	1.75161	2.21003	2.31681	1.84946	1.97613	1.45829	1.44257	1.35773	1.4614	1.29157	1.11722	1.13525	1.19685	0.998389	1.12126	1.28704	0.977639	1.53673	1.55486
simsample129	-57.2	5250630	3.41166	2.71281	0.00398115	0.00398115	6.15344	5.76309	0.117133	5	3.25134	3.08701	3.44527	3.39287	3.75656	3.98739	3.51801	3.63847	3.57027	2.95526	3.88711	3.81781	3.75581	3.6888	3.91959	4.14647	2.29454	2.44239	3.05126	2.48616	1.75112	2.21066	2.32214	1.84615	1.97264	1.45304	1.43987	1.3549	1.45922	1.28575	1.10834	1.12255	1.18371	0.986728	1.10539	1.27098	0.961604	1.51648	1.53483
simsample130	-51.5	4418260	3.34608	2.72086	0.00388719	0.00388719	5.95625	5.97655	0.0903303	5	3.50404	3.38979	3.69832	3.61378	4.08129	4.21503	3.80937	3.91582	3.81235	3.2321	4.20883	4.0599	4.04826	3.91493	4.21934	4.37681	2.34546	2.46503	3.10857	2.5097	1.7883	2.26355	2.35615	1.8717	2.00285	1.47531	1.45256	1.3737	1.47885	1.31101	1.13563	1.15764	1.21742	1.01758	1.1406	1.30414	0.995953	1.57609	1.58701
simsample131	-62.65	5483850	3.4216	2.52324	0.00404472	0.00404472	6.07369	5.7435	0.127305	5	3.12871	2.95237	3.32369	3.27553	3.60912	3.87022	3.38578	3.50169	3.44217	2.82263	3.7486	3.70249	3.62596	3.57332	3.77603	4.03219	2.23228	2.3897	2.9908	2.44021	1.70666	2.1598	2.27434	1.80587	1.93313	1.42018	1.41227	1.32735	1.43106	1.25666	1.0818	1.09269	1.15427	0.96129	1.07717	1.24164	0.933115	1.4775	1.49749
simsample132	-47.5	4353720	3.3453	2.82146	0.00386701	0.00386701	5.68913	5.97957	0.0881418	5	3.52168	3.41014	3.71443	3.63446	4.11498	4.2412	3.84057	3.94713	3.8451	3.26316	4.23473	4.08769	4.07472	3.9353	4.24123	4.3945	2.36169	2.47521	3.12261	2.52792	1.80094	2.27303	2.36778	1.88371	2.01293	1.48707	1.4626	1.38242	1.48421	1.31518	1.14218	1.16418	1.22612	1.02395	1.14919	1.31123	1.00508	1.58527	1.59798
simsample133	-50.15	4484050	3.35157	2.79837	0.00391082	0.00391082	5.78172	5.86598	0.0950784	5	3.42892	3.30126	3.61545	3.55152	3.99449	4.14284	3.72822	3.83523	3.73627	3.15299	4.10715	3.98254	3.95772	3.84139	4.12983	4.29731	2.32594	2.44517	3.07444	2.49038	1.77631	2.2435	2.33956	1.86104	1.98906	1.46782	1.44655	1.36757	1.46951	1.29922	1.12429	1.1437	1.20477	1.00603	1.12816	1.28992	0.984359	1.55303	1.56878
simsample134	-51.3	4256260	3.31401	2.78621	0.00388519	0.00388519	6.05954	5.82324	0.0922858	5	3.468	3.34782	3.65756	3.58752	4.04935	4.19064	3.78276	3.88099	3.78182	3.20112	4.16047	4.02701	4.0103	3.87791	4.17241	4.32975	2.34313	2.4639	3.10362	2.51385	1.7936	2.26393	2.36036	1.87923	2.00866	1.4822	1.45994	1.37859	1.48298	1.31529	1.14162	1.16397	1.22428	1.0224	1.14501	1.31047	1.00387	1.58094	1.59483
simsample135	-53.85	5685280	3.4368	2.49098	0.00396723	0.00396723	5.89877	5.64836	0.104851	5	3.36347	3.22422	3.55842	3.48006	3.89499	4.08709	3.65544	3.77083	3.68538	3.07743	4.05734	3.9396	3.90207	3.79828	4.07423	4.27675	2.29555	2.42633	3.06885	2.47959	1.74444	2.21525	2.31459	1.8251	1.95096	1.42925	1.41598	1.33566	1.43821	1.26786	1.09249	1.11019	1.16861	0.970711	1.09296	1.25294	0.944405	1.50361	1.51546
simsample136	-62.1	5386290	3.41229	2.4371	0.00403049	0.00403049	5.97661	5.85279	0.129097	5	3.12968	2.95262	3.32695	3.28478	3.61398	3.87995	3.38408	3.50179	3.4451	2.82049	3.74983	3.70351	3.62427	3.57725	3.7794	4.03562	2.22937	2.38855	2.99068	2.44051	1.70367	2.16038	2.28162	1.81013	1.93756	1.42258	1.41538	1.32804	1.43534	1.25935	1.08351	1.09561	1.15659	0.960832	1.08011	1.24624	0.93286	1.47918	1.49871
simsample137	-50.3	4789680	3.39148	2.84219	0.00390465	0.00390465	5.9917	5.93289	0.0974078	5	3.4473	3.32005	3.64607	3.57903	4.00988	4.1745	3.749	3.85386	3.76059	3.17217	4.136	4.01031	3.98069	3.86868	4.14605	4.33242	2.34917	2.4731	3.11074	2.52432	1.79517	2.26261	2.35999	1.87385	2.00382	1.48156	1.4597	1.37476	1.47827	1.30839	1.1314	1.14922	1.20674	1.00843	1.13187	1.29412	0.988245	1.55781	1.57083
simsample138	-48.6	4536310	3.38806	2.80995	0.00384663	0.00384663	5.84533	6.17401	0.0796352	5	3.62971	3.53475	3.82361	3.72271	4.23367	4.33715	3.96526	4.07034	3.95449	3.38357	4.38435	4.19599	4.2054	4.04159	4.37878	4.50714	2.3868	2.48639	3.15524	2.54648	1.82146	2.30236	2.38453	1.88951	2.01913	1.4871	1.46041	1.38377	1.48463	1.31899	1.14247	1.1643	1.22484	1.02345	1.14884	1.30582	0.99965	1.58433	1.59313
simsample139	-52.55	4159940	3.29974	2.78338	0.00392178	0.00392178	5.94886	5.66699	0.0896083	5	3.40621	3.29626	3.59347	3.51805	3.97899	4.10243	3.7109	3.80605	3.71159	3.15018	4.08727	3.94585	3.93312	3.79985	4.09593	4.2524	2.29294	2.40575	3.02578	2.45053	1.75273	2.20927	2.30336	1.83436	1.96416	1.45043	1.42833	1.34857	1.45053	1.28454	1.11442	1.1379	1.1983	1.00418	1.12537	1.28932	0.986812	1.55739	1.57058
simsample140	-53.55	4749530	3.34687	2.80342	0.00403799	0.00403799	5.72045	5.46124	0.117904	5	3.14572	2.98709	3.33515	3.2986	3.65203	3.87711	3.41344	3.51474	3.45081	2.86133	3.75278	3.69662	3.62992	3.57048	3.77937	4.00847	2.23572	2.38095	2.96358	2.42193	1.70903	2.15238	2.26179	1.80835	1.93245	1.42619	1.41502	1.33245	1.43341	1.26563	1.09458	1.10921	1.16838	0.975608	1.09222	1.25747	0.952134	1.49494	1.51532
simsample141	-49.85	4286100	3.32205	2.80622	0.00389055	0.00389055	5.74932	5.84165	0.0928256	5	3.45795	3.3391	3.64941	3.57799	4.03558	4.17754	3.76521	3.86755	3.76761	3.18536	4.13425	3.99972	3.98248	3.85861	4.14799	4.31432	2.33637	2.45652	3.08925	2.50538	1.78907	2.25434	2.35189	1.8707	2.00093	1.47735	1.45783	1.37639	1.4779	1.31281	1.13971	1.16258	1.22263	1.02214	1.14601	1.31262	1.00179	1.58034	1.59432
simsample142	-47.75	4650930	3.36035	2.75876	0.00388828	0.00388828	5.82189	5.89842	0.0988971	5	3.46232	3.32886	3.6619	3.5967	4.03654	4.20808	3.77283	3.88662	3.79646	3.19463	4.16604	4.0446	4.00688	3.89084	4.17069	4.35981	2.36715	2.4935	3.13191	2.53934	1.80495	2.27792	2.37826	1.89084	2.02311	1.49229	1.47257	1.39045	1.49356	1.32452	1.14611	1.16501	1.22586	1.02248	1.14739	1.31309	1.00101	1.57988	1.59731
simsample143	-54.7	4840480	3.35647	2.81909	0.00403627	0.00403627	5.93722	5.48445	0.118919	5	3.16	3.00116	3.35674	3.31536	3.66878	3.89095	3.42291	3.52991	3.46522	2.87329	3.76775	3.71495	3.64345	3.58168	3.78952	4.01665	2.24301	2.39056	2.97746	2.43593	1.71901	2.16464	2.2743	1.82016	1.94298	1.43651	1.42525	1.34255	1.44681	1.27758	1.10476	1.11975	1.1783	0.983373	1.10165	1.26568	0.95731	1.50334	1.52494
simsample144	-60.6	5473480	3.41802	2.50756	0.00404407	0.00404407	6.00618	5.75968	0.12973	5	3.1174	2.93877	3.31235	3.27006	3.59708	3.86887	3.37313	3.49297	3.43307	2.80561	3.72661	3.6859	3.60477	3.56201	3.7615	4.01949	2.23176	2.39619	2.991	2.44162	1.70425	2.1575	2.27731	1.80817	1.93624	1.42426	1.41723	1.33065	1.43561	1.26108	1.0877	1.09982	1.15843	0.962146	1.08064	1.24522	0.934668	1.48005	1.50009
simsample145	-51.8	4561930	3.34344	2.74627	0.00394841	0.00394841	5.7627	5.85764	0.116794	5	3.25356	3.09884	3.45913	3.41524	3.78254	4.00446	3.52993	3.63782	3.57073	2.95755	3.87612	3.81871	3.75755	3.68934	3.9062	4.1374	2.30106	2.44856	3.04956	2.49238	1.75661	2.21493	2.32821	1.86103	1.99122	1.47029	1.45716	1.37218	1.47858	1.3058	1.12748	1.14385	1.20414	1.00584	1.12478	1.29636	0.981936	1.54352	1.56271
simsample146	-51.7	4319750	3.31418	2.73079	0.00390276	0.00390276	5.96898	6.00456	0.117907	5	3.30127	3.13845	3.50449	3.46932	3.83888	4.06827	3.57953	3.6904	3.6181	2.99869	3.92865	3.8686	3.79996	3.73267	3.95222	4.19614	2.3424	2.49179	3.10259	2.53491	1.79123	2.25459	2.3757	1.89961	2.03357	1.50244	1.49002	1.40353	1.51117	1.33439	1.15409	1.16872	1.23042	1.02836	1.14995	1.32647	1.00625	1.58216	1.60342
simsample147	-52.3	4268890	3.31682	2.60605	0.00393428	0.00393428	5.69836	6.0122	0.102957	5	3.37954	3.2386	3.57322	3.51257	3.94122	4.11899	3.67712	3.7822	3.69249	3.09333	4.05253	3.94077	3.90003	3.79517	4.05886	4.24616	2.3066	2.44439	3.07491	2.49656	1.76888	2.2388	2.34701	1.86737	1.99908	1.46997	1.45234	1.37072	1.47326	1.30372	1.12963	1.1495	1.20973	1.00792	1.13023	1.29845	0.989383	1.5634	1.58116
simsample148	-59	4764560	3.35591	2.76909	0.00406406	0.00406406	5.82136	5.5187	0.120526	5	3.09894	2.93889	3.29311	3.25448	3.59883	3.8305	3.36294	3.46644	3.40315	2.81198	3.69224	3.64109	3.57145	3.51498	3.71453	3.95224	2.20633	2.3531	2.93048	2.39494	1.68646	2.12685	2.23524	1.78636	1.91018	1.41271	1.40078	1.31928	1.42198	1.25452	1.08295	1.09637	1.1552	0.964292	1.08043	1.24151	0.939969	1.4779	1.49926
simsample149	-50.8	4311480	3.30418	2.75121	0.00388694	0.00388694	6.05101	5.70721	0.0957929	5	3.44483	3.31997	3.64165	3.58037	4.03012	4.17677	3.75315	3.8531	3.757	3.17339	4.13006	3.99688	3.97333	3.85762	4.13153	4.30665	2.33974	2.46248	3.09716	2.51342	1.79161	2.25705	2.35609	1.87869	2.00957	1.48185	1.46177	1.37895	1.48374	1.31643	1.14364	1.16443	1.22761	1.02594	1.15021	1.31754	1.00675	1.58818	1.60254
simsample150	-54.9	4946250	3.41758	2.77794	0.00394618	0.00394618	5.9577	5.90583	0.0909434	5	3.44434	3.33143	3.63855	3.55615	4.00689	4.1461	3.75029	3.85678	3.75971	3.18315	4.14641	4.00215	3.98943	3.85845	4.15563	4.31821	2.30915	2.41932	3.05804	2.47455	1.76115	2.22659	2.31755	1.83251	1.95755	1.4413	1.42372	1.34471	1.44445	1.27965	1.10483	1.12633	1.18395	0.988039	1.10802	1.26531	0.964134	1.52347	1.53292
simsample151	-49.05	4419350	3.32795	2.74546	0.00390276	0.00390276	5.87629	5.8536	0.0994953	5	3.43592	3.30694	3.6347	3.57444	4.01575	4.18314	3.74198	3.84933	3.75889	3.16044	4.12171	4.00514	3.96969	3.85957	4.13345	4.31919	2.35109	2.48408	3.11835	2.52936	1.79727	2.26646	2.37028	1.88611	2.01621	1.48843	1.46905	1.38619	1.49178	1.32352	1.14655	1.16504	1.2254	1.02096	1.1466	1.31219	1.00253	1.58241	1.59616
simsample152	-54.95	4448480	3.35467	2.83206	0.00399698	0.00399698	5.70643	5.94209	0.11094	5	3.25181	3.10324	3.44774	3.40387	3.78333	3.99076	3.5372	3.6414	3.56673	2.97049	3.88021	3.80025	3.74588	3.67337	3.90476	4.11546	2.27772	2.41536	3.0132	2.45917	1.74215	2.19502	2.30223	1.83664	1.95981	1.45183	1.43557	1.35221	1.45452	1.28508	1.11263	1.1283	1.18592	0.991987	1.11019	1.27344	0.967731	1.52053	1.53966
simsample153	-58.45	5229540	3.41681	2.6748	0.00398115	0.00398115	6.12362	5.80147	0.11074	5	3.29368	3.14468	3.49205	3.42827	3.8128	4.02326	3.57202	3.68108	3.60552	3.00052	3.942	3.85573	3.80321	3.72339	3.96695	4.18445	2.2879	2.42291	3.04294	2.47389	1.74673	2.21021	2.3124	1.83497	1.96572	1.44555	1.43253	1.34648	1.44863	1.27899	1.1025	1.11792	1.17742	0.978917	1.09886	1.26188	0.953433	1.50735	1.52389
simsample154	-55.8	4434120	3.35315	2.82183	0.00398969	0.00398969	5.69216	5.86881	0.105058	5	3.2741	3.13913	3.46785	3.41281	3.80729	3.99257	3.55623	3.6615	3.58207	2.99893	3.91591	3.81721	3.77833	3.68407	3.92989	4.12585	2.26731	2.39725	3.00073	2.4432	1.73682	2.18675	2.29004	1.8254	1.95259	1.44263	1.42646	1.34426	1.44517	1.27989	1.10749	1.12436	1.18396	0.986844	1.10578	1.26415	0.963407	1.5148	1.52897
simsample155	-53.35	4419150	3.34534	2.75369	0.00398563	0.00398563	5.56394	5.91289	0.107859	5	3.27582	3.13141	3.46705	3.41307	3.80859	3.9955	3.55478	3.66124	3.58032	2.98907	3.91429	3.8282	3.78307	3.6953	3.93591	4.14031	2.27578	2.40936	3.01524	2.45346	1.73722	2.18838	2.29188	1.82461	1.95415	1.4421	1.42802	1.34473	1.44778	1.28222	1.11165	1.12864	1.18854	0.991923	1.10946	1.27501	0.972713	1.52788	1.54451
simsample156	-60.9	5496250	3.40885	2.48731	0.00404269	0.00404269	5.99566	5.74171	0.137084	5	3.07876	2.88655	3.27798	3.24578	3.55381	3.84348	3.32579	3.4425	3.39596	2.76053	3.67338	3.65279	3.55863	3.53168	3.71155	3.98594	2.23474	2.40567	3.00099	2.45408	1.70928	2.16373	2.28768	1.81691	1.94675	1.43091	1.42676	1.33676	1.44223	1.26631	1.08904	1.09902	1.1616	0.965086	1.08515	1.25443	0.937334	1.48147	1.5025
simsample157	-51.7	4321640	3.3117	2.75817	0.00388694	0.00388694	6.08725	5.68744	0.0910634	5	3.45679	3.34153	3.64933	3.58021	4.04207	4.17183	3.76485	3.86594	3.76389	3.18958	4.14511	3.99893	3.98572	3.85811	4.15513	4.3123	2.32893	2.44422	3.08041	2.49402	1.78031	2.24494	2.34075	1.86432	1.99464	1.47259	1.45086	1.36996	1.47208	1.30635	1.13377	1.15573	1.21669	1.01658	1.1409	1.30672	0.998204	1.57459	1.58866
simsample158	-57.1	4727770	3.33968	2.76891	0.00406406	0.00406406	5.79067	5.55358	0.132086	5	3.05364	2.87231	3.24389	3.22058	3.53739	3.8015	3.30519	3.41468	3.36162	2.74646	3.61496	3.59849	3.51064	3.48145	3.65221	3.91674	2.22344	2.3858	2.95124	2.42893	1.70268	2.14028	2.26219	1.81801	1.93987	1.43609	1.42622	1.33866	1.44087	1.26932	1.09565	1.1061	1.16699	0.975556	1.09209	1.2608	0.951586	1.49131	1.51643
simsample159	-57.25	4716490	3.3457	2.77628	0.00406406	0.00406406	5.79707	5.56357	0.12412	5	3.11	2.94066	3.29826	3.26713	3.60216	3.84635	3.37007	3.47716	3.41436	2.81192	3.69062	3.65425	3.57443	3.53027	3.72217	3.95798	2.22845	2.38083	2.95438	2.41892	1.70301	2.14557	2.26067	1.80923	1.93388	1.42801	1.41916	1.33487	1.43743	1.27014	1.09835	1.11252	1.17217	0.977144	1.09511	1.26185	0.955117	1.49769	1.52067
simsample160	-52.8	5675040	3.42494	2.51223	0.003975	0.003975	5.91291	5.66456	0.11879	5	3.27332	3.10561	3.47402	3.41324	3.78428	4.03133	3.54927	3.66774	3.59477	2.96729	3.92702	3.85711	3.79492	3.72065	3.95595	4.19257	2.29554	2.44232	3.06979	2.49611	1.7478	2.21857	2.33192	1.84571	1.97394	1.45049	1.43915	1.35273	1.46026	1.28152	1.10378	1.11846	1.18092	0.983016	1.10354	1.26787	0.953362	1.51261	1.53194
simsample161	-50.9	4600810	3.37444	2.77046	0.0039048	0.0039048	5.83913	5.96421	0.0955033	5	3.42622	3.3027	3.6212	3.54081	3.98319	4.13912	3.72752	3.83544	3.74168	3.15738	4.11895	3.98753	3.96584	3.84412	4.12986	4.31237	2.32698	2.44671	3.07964	2.49654	1.7721	2.23645	2.33484	1.85472	1.98471	1.46127	1.44015	1.36013	1.46475	1.2948	1.12162	1.14097	1.19942	1.0006	1.12106	1.28113	0.97904	1.54496	1.55746
simsample162	-52.7	4886570	3.37083	2.85869	0.00403555	0.00403555	5.82401	5.54951	0.118246	5	3.16819	3.0074	3.3623	3.32502	3.67408	3.90081	3.43378	3.54146	3.47495	2.87883	3.76753	3.7149	3.65183	3.59311	3.80132	4.02865	2.25097	2.39764	2.98044	2.43482	1.71979	2.1637	2.27512	1.81698	1.9404	1.43537	1.42335	1.33907	1.44138	1.27222	1.09858	1.11326	1.17227	0.977998	1.09542	1.25861	0.954797	1.49807	1.51736
simsample163	-46.95	4525720	3.37737	2.79742	0.00384663	0.00384663	5.80722	6.06094	0.0756911	5	3.66525	3.58006	3.86107	3.74978	4.28263	4.36785	4.00398	4.10924	3.98872	3.41975	4.42426	4.22627	4.24396	4.07159	4.42302	4.54112	2.39262	2.48583	3.15767	2.53808	1.81922	2.29908	2.38454	1.8874	2.01688	1.48351	1.45752	1.38062	1.48113	1.31769	1.14475	1.16838	1.22643	1.02571	1.15198	1.31117	1.00569	1.59167	1.59799
simsample164	-61.55	5373590	3.41789	2.45784	0.00402321	0.00402321	5.90583	5.95665	0.128506	5	3.16059	2.97741	3.35693	3.31283	3.64899	3.91834	3.42159	3.54076	3.48358	2.85191	3.7891	3.74208	3.66016	3.61451	3.8221	4.07732	2.25505	2.41504	3.0261	2.46815	1.72066	2.18596	2.30577	1.82466	1.9555	1.4362	1.42792	1.34088	1.44722	1.2714	1.09373	1.10592	1.1668	0.96939	1.08982	1.25755	0.941681	1.49116	1.51287
simsample165	-58.15	5386690	3.4337	2.68391	0.00402807	0.00402807	6.03051	5.89006	0.121215	5	3.21433	3.04739	3.41069	3.35894	3.71258	3.96204	3.48546	3.60357	3.54003	2.91776	3.84466	3.78561	3.71675	3.65786	3.87482	4.11983	2.28144	2.43288	3.04321	2.48117	1.74369	2.20471	2.31756	1.83885	1.96474	1.44769	1.43553	1.35025	1.45267	1.2812	1.10267	1.11663	1.17683	0.979121	1.09595	1.25926	0.949186	1.4968	1.51352
simsample166	-53.35	4434190	3.34416	2.78805	0.00399236	0.00399236	5.56912	5.90839	0.114937	5	3.22098	3.06667	3.41522	3.37692	3.74307	3.95356	3.49497	3.60102	3.52467	2.92697	3.83114	3.76562	3.70556	3.63404	3.85431	4.07745	2.26744	2.4146	3.01044	2.46054	1.73868	2.18845	2.29821	1.83693	1.96543	1.45367	1.43646	1.35462	1.46033	1.28751	1.11502	1.1301	1.18904	0.990625	1.11093	1.27454	0.969349	1.52268	1.54263
simsample167	-53.1	4316420	3.33864	2.78096	0.00393468	0.00393468	5.6816	5.9586	0.103946	5	3.3158	3.17656	3.50742	3.45126	3.86136	4.0407	3.60462	3.70789	3.62643	3.03531	3.96297	3.8666	3.82641	3.72689	3.9791	4.17581	2.28861	2.41868	3.02912	2.46391	1.74865	2.2039	2.30768	1.84168	1.96792	1.45022	1.43576	1.35356	1.45628	1.28798	1.11689	1.13396	1.19395	0.996915	1.1195	1.28027	0.976516	1.54061	1.55596
simsample168	-50.95	5001430	3.40508	2.87352	0.00399423	0.00399423	5.65584	5.67507	0.101864	5	3.31909	3.18233	3.50549	3.44156	3.84597	4.02509	3.59771	3.70917	3.6305	3.05173	3.97788	3.86979	3.83282	3.73421	3.99419	4.18624	2.28444	2.40625	3.01892	2.45433	1.74021	2.19621	2.29384	1.82305	1.94911	1.44062	1.42444	1.3426	1.44298	1.27519	1.10116	1.11951	1.17741	0.982795	1.10205	1.25856	0.957687	1.50613	1.52083
simsample169	-52.55	4877700	3.36786	2.8631	0.00403555	0.00403555	5.77175	5.59752	0.123906	5	3.1427	2.96995	3.33089	3.30075	3.63667	3.88085	3.40096	3.51076	3.44653	2.83733	3.72578	3.693	3.61456	3.57226	3.76648	4.01594	2.26457	2.41769	2.99759	2.4562	1.72926	2.17423	2.29216	1.83362	1.95793	1.44826	1.4401	1.35286	1.45635	1.28413	1.10905	1.12082	1.18181	0.986504	1.10749	1.27429	0.964153	1.50903	1.53171
simsample170	-48.55	4340500	3.29322	2.65259	0.00392912	0.00392912	5.68267	5.6174	0.102275	5	3.36374	3.23032	3.5632	3.50266	3.92859	4.09935	3.65877	3.75882	3.67114	3.07597	4.02205	3.90675	3.87403	3.77167	4.03639	4.22429	2.30488	2.4392	3.05821	2.48282	1.76336	2.22501	2.33314	1.85905	1.98807	1.46592	1.44881	1.3658	1.47272	1.30382	1.13209	1.15082	1.21246	1.01206	1.13495	1.30404	0.992711	1.56997	1.58752
simsample171	-49.95	4422870	3.35774	2.6851	0.00387986	0.00387986	5.71034	6.13978	0.0878756	5	3.55082	3.44213	3.74751	3.65892	4.14523	4.26954	3.86977	3.97703	3.87582	3.28774	4.28195	4.12198	4.11688	3.97558	4.29676	4.44589	2.37288	2.48369	3.145	2.53622	1.80556	2.2811	2.375	1.88395	2.01343	1.48189	1.46039	1.38031	1.48352	1.31423	1.13804	1.16075	1.2196	1.0189	1.14423	1.30537	0.996483	1.57958	1.59134
simsample172	-49.2	5102120	3.40944	2.60436	0.0038615	0.0038615	6.11419	6.0053	0.0938681	5	3.55734	3.43433	3.75949	3.66871	4.13204	4.28899	3.86564	3.97911	3.88682	3.27577	4.29091	4.13763	4.12093	3.98939	4.29796	4.46847	2.38385	2.50293	3.16802	2.55882	1.81259	2.30145	2.40049	1.89485	2.02664	1.48615	1.46625	1.38298	1.48738	1.31307	1.13587	1.15832	1.21893	1.01493	1.1397	1.30344	0.991094	1.57726	1.58781
simsample173	-50.65	4305160	3.30689	2.75812	0.00388694	0.00388694	6.09817	5.67806	0.0916925	5	3.45759	3.34319	3.65343	3.58358	4.0467	4.17787	3.77046	3.8669	3.76585	3.18616	4.14882	4.00705	3.98826	3.85666	4.14714	4.30892	2.32777	2.44595	3.07823	2.49258	1.78132	2.24677	2.34344	1.86597	1.99749	1.47458	1.4522	1.37301	1.47559	1.30736	1.13345	1.15561	1.21825	1.01732	1.14088	1.3054	0.999537	1.57415	1.58967
simsample174	-49.3	5044380	3.38203	2.62577	0.00388208	0.00388208	6.13153	5.79645	0.10229	5	3.46215	3.31953	3.65975	3.58599	4.01785	4.20384	3.76223	3.87518	3.78341	3.17335	4.16004	4.03893	4.00724	3.89974	4.17693	4.37601	2.36525	2.49653	3.14442	2.547	1.80328	2.28163	2.38568	1.89058	2.02743	1.49114	1.47261	1.39143	1.49828	1.32103	1.1406	1.16002	1.21921	1.01608	1.14076	1.30401	0.989433	1.56746	1.58202
simsample175	-51.45	4789840	3.34809	2.75808	0.00401374	0.00401374	5.76314	5.48546	0.11542	5	3.19312	3.03974	3.38583	3.3447	3.7128	3.92674	3.46462	3.56981	3.49995	2.90149	3.79992	3.72851	3.67068	3.61003	3.82709	4.04775	2.24558	2.39037	2.98329	2.43532	1.72192	2.16847	2.27975	1.8215	1.94504	1.43802	1.42246	1.34033	1.44467	1.27601	1.10331	1.11752	1.17588	0.98058	1.1008	1.26631	0.962328	1.51253	1.53201
simsample176	-51.75	4418660	3.36483	2.80702	0.00390121	0.00390121	5.78973	6.10176	0.0950127	5	3.44071	3.32186	3.63587	3.56037	3.99903	4.14934	3.73589	3.84384	3.75218	3.16984	4.12469	3.99679	3.97491	3.85443	4.14246	4.31368	2.33041	2.45308	3.08617	2.50125	1.7786	2.24807	2.34285	1.8642	1.99203	1.46813	1.44898	1.36822	1.47057	1.30291	1.12852	1.14943	1.21092	1.01228	1.13535	1.29743	0.992074	1.56405	1.57713
simsample177	-53.3	4429120	3.34079	2.7681	0.00400681	0.00400681	5.58853	5.88737	0.115509	5	3.21128	3.05499	3.40818	3.36964	3.73636	3.95686	3.49131	3.5953	3.5268	2.9276	3.83337	3.77212	3.70407	3.63632	3.85215	4.07258	2.26453	2.40891	3.00329	2.45133	1.73031	2.18353	2.29216	1.83434	1.96333	1.44886	1.43525	1.34761	1.44976	1.28136	1.10821	1.12326	1.18355	0.985795	1.10527	1.27325	0.966003	1.51898	1.53915
simsample178	-61.9	5515690	3.43735	2.46895	0.00403141	0.00403141	5.95148	5.94428	0.120847	5	3.21976	3.0529	3.4208	3.3645	3.72232	3.96827	3.4917	3.61159	3.54848	2.92448	3.87457	3.80596	3.73356	3.67027	3.89623	4.13698	2.26252	2.41525	3.02943	2.46407	1.7226	2.1878	2.29788	1.81603	1.94713	1.42794	1.41769	1.33295	1.4394	1.26602	1.08813	1.10227	1.16155	0.962667	1.08325	1.2465	0.935556	1.48587	1.50021
simsample179	-57	5315430	3.43152	2.67444	0.00395988	0.00395988	6.10787	5.76511	0.0969078	5	3.41094	3.2904	3.61264	3.52982	3.96549	4.12797	3.71481	3.82222	3.73134	3.14806	4.11893	3.98514	3.96396	3.84537	4.12999	4.30889	2.31066	2.42998	3.06963	2.48161	1.75901	2.22501	2.3137	1.82981	1.95962	1.44033	1.42423	1.34083	1.44227	1.27296	1.0986	1.11786	1.17624	0.979316	1.09994	1.2577	0.956599	1.51546	1.52681
simsample180	-59.35	4442900	3.36779	2.79564	0.0039934	0.0039934	5.81697	6.06077	0.108428	5	3.25573	3.1155	3.45	3.39372	3.78193	3.98152	3.53854	3.64961	3.5709	2.98121	3.89404	3.80741	3.76114	3.67764	3.91525	4.11757	2.26521	2.40134	3.00487	2.44641	1.73327	2.18522	2.28631	1.82208	1.94803	1.43884	1.42194	1.33807	1.44118	1.27293	1.10232	1.11977	1.17792	0.982465	1.09921	1.26099	0.958025	1.50882	1.52563
simsample181	-44.15	4643010	3.37402	2.78227	0.00385597	0.00385597	5.68175	5.9248	0.0799339	5	3.63622	3.54256	3.83532	3.72949	4.24127	4.34505	3.96982	4.07248	3.95528	3.37913	4.38657	4.20538	4.21371	4.05177	4.38773	4.5198	2.38936	2.49246	3.16127	2.5489	1.82594	2.30627	2.39096	1.89031	2.02611	1.49336	1.46817	1.38773	1.4915	1.32527	1.14858	1.17368	1.2341	1.02996	1.15568	1.31477	1.00781	1.59599	1.60355
simsample182	-50.85	4426160	3.3597	2.69123	0.00387203	0.00387203	5.71476	6.12117	0.089246	5	3.51645	3.40673	3.71651	3.62334	4.10376	4.23183	3.82517	3.93181	3.83166	3.24882	4.23181	4.07065	4.06359	3.92685	4.23854	4.39171	2.3464	2.46334	3.11484	2.51437	1.7905	2.2662	2.35895	1.86905	2.00018	1.47274	1.45138	1.37275	1.47503	1.30752	1.1318	1.15223	1.21239	1.01235	1.13947	1.30096	0.992924	1.57133	1.58289
simsample183	-61.9	5416340	3.41723	2.57271	0.0040481	0.0040481	6.05386	5.7055	0.125477	5	3.13498	2.96174	3.32874	3.28191	3.61822	3.87367	3.39522	3.50995	3.4499	2.83218	3.75302	3.70666	3.63053	3.57737	3.78541	4.02771	2.23059	2.39128	2.98579	2.43532	1.70342	2.15688	2.27378	1.80669	1.93515	1.42222	1.41551	1.32939	1.43326	1.26024	1.08361	1.09455	1.15433	0.959797	1.07681	1.24255	0.934246	1.47523	1.4946
simsample184	-52.65	4779840	3.37483	2.79674	0.00397457	0.00397457	5.87729	5.90244	0.11726	5	3.26425	3.10004	3.46132	3.42128	3.78159	4.01602	3.5421	3.65606	3.58415	2.9698	3.89175	3.83066	3.76406	3.69612	3.91472	4.15055	2.31051	2.46239	3.07103	2.50799	1.76951	2.2303	2.34459	1.86859	1.99738	1.47387	1.46197	1.37404	1.48022	1.30521	1.12861	1.14461	1.20336	1.00485	1.12616	1.29194	0.979702	1.53754	1.55601
simsample185	-61.45	5536420	3.42059	2.57403	0.00403065	0.00403065	6.19135	5.70642	0.130687	5	3.12328	2.94048	3.31856	3.27699	3.60094	3.87809	3.37879	3.49944	3.44499	2.81824	3.73686	3.7069	3.61993	3.57869	3.77949	4.03936	2.24996	2.41439	3.01321	2.46286	1.72004	2.17544	2.29618	1.82338	1.95346	1.43662	1.43062	1.34311	1.45024	1.27362	1.09496	1.10505	1.16877	0.971867	1.0915	1.25832	0.942446	1.48309	1.50221
simsample186	-48.95	4452080	3.33951	2.66671	0.00389468	0.00389468	5.62421	5.90975	0.0943199	5	3.46094	3.33697	3.65788	3.58211	4.03652	4.1863	3.76781	3.87479	3.77776	3.19157	4.16391	4.02531	4.00229	3.87812	4.16872	4.33838	2.33272	2.45539	3.09952	2.50998	1.78565	2.25409	2.35	1.86574	1.99765	1.47314	1.45274	1.37252	1.47623	1.30545	1.13274	1.15245	1.21371	1.01308	1.137	1.30032	0.993349	1.57233	1.58546
simsample187	-51.6	4349410	3.32942	2.67767	0.00392768	0.00392768	5.6667	5.99165	0.105272	5	3.35959	3.21829	3.55198	3.49182	3.91087	4.09684	3.64818	3.75818	3.67539	3.07222	4.01842	3.91846	3.87833	3.78167	4.04186	4.2414	2.31841	2.45229	3.07702	2.50018	1.77229	2.23824	2.34379	1.86933	1.9964	1.4734	1.45579	1.37184	1.47547	1.30528	1.13161	1.14885	1.21047	1.0099	1.13209	1.30069	0.99107	1.56326	1.58152
simsample188	-51.75	5229820	3.41875	2.66215	0.00391472	0.00391472	6.0782	5.91243	0.106843	5	3.38914	3.24474	3.5884	3.51569	3.92025	4.12941	3.67622	3.7891	3.70305	3.09182	4.05919	3.95483	3.91425	3.82552	4.08966	4.30369	2.33938	2.47123	3.10597	2.52078	1.77986	2.24873	2.35328	1.86369	1.99451	1.46582	1.45202	1.36699	1.47427	1.30018	1.11936	1.1373	1.19744	0.997824	1.11849	1.28246	0.970367	1.53383	1.54982
simsample189	-52.35	4292300	3.3119	2.76991	0.00389556	0.00389556	6.13569	5.77491	0.0954317	5	3.43733	3.31672	3.63324	3.5641	4.01159	4.15896	3.73881	3.8436	3.74881	3.16139	4.11394	3.98495	3.9609	3.84329	4.1232	4.30131	2.33188	2.45526	3.08314	2.50563	1.7862	2.25172	2.34855	1.87179	1.99905	1.4765	1.45718	1.3776	1.48254	1.31347	1.13928	1.16045	1.22255	1.01978	1.14491	1.30859	1.00318	1.5796	1.59291
simsample190	-56.05	4478640	3.36108	2.76839	0.00392494	0.00392494	5.97415	6.08677	0.10793	5	3.33091	3.18606	3.53285	3.47458	3.87403	4.07025	3.62185	3.72959	3.65116	3.05062	3.99064	3.89965	3.85298	3.77106	4.01083	4.22372	2.31811	2.4562	3.07395	2.50006	1.77068	2.23043	2.33655	1.86062	1.98825	1.46893	1.45297	1.3672	1.47047	1.3019	1.12838	1.14321	1.20562	1.00467	1.12553	1.29369	0.982571	1.54609	1.56462
simsample191	-59.6	4298820	3.33112	2.81115	0.00398328	0.00398328	5.98129	5.94743	0.11818	5	3.18494	3.02308	3.37345	3.33745	3.69702	3.91801	3.45164	3.55702	3.49316	2.89319	3.78779	3.7374	3.6723	3.60746	3.81335	4.04687	2.26327	2.41047	2.99839	2.44734	1.72726	2.17352	2.2901	1.83308	1.96197	1.44967	1.43753	1.35467	1.45842	1.28933	1.11539	1.13092	1.19021	0.994073	1.11364	1.28051	0.970986	1.52148	1.54432
simsample192	-50.8	4364430	3.33127	2.76105	0.00391252	0.00391252	5.82133	5.82704	0.0909287	5	3.46612	3.34813	3.6563	3.58291	4.04666	4.18272	3.78044	3.8795	3.77578	3.19426	4.15691	4.01076	3.99888	3.86668	4.16367	4.32284	2.32833	2.44712	3.0814	2.49247	1.78366	2.24972	2.34877	1.86428	1.99478	1.47138	1.44876	1.36791	1.47004	1.30343	1.13023	1.15481	1.21221	1.01307	1.13534	1.30025	0.993668	1.57138	1.58397
simsample193	-48.2	4532340	3.35168	2.80254	0.00391082	0.00391082	5.77245	5.88647	0.098511	5	3.43707	3.30746	3.62887	3.56462	4.00435	4.17098	3.73897	3.84186	3.74965	3.15888	4.11674	4.00027	3.97168	3.8656	4.13834	4.32597	2.34844	2.47528	3.11408	2.52393	1.79679	2.26563	2.36427	1.88048	2.00988	1.48617	1.46649	1.38364	1.48667	1.31603	1.14005	1.15865	1.21954	1.02016	1.14319	1.30962	0.999897	1.57693	1.59501
simsample194	-56.35	5342160	3.43037	2.66491	0.00395988	0.00395988	6.10831	5.7687	0.0996965	5	3.39829	3.26995	3.59155	3.50855	3.93583	4.11566	3.69298	3.80412	3.71765	3.12063	4.09289	3.96852	3.94198	3.83259	4.11419	4.29798	2.31154	2.43502	3.06924	2.48392	1.75831	2.22727	2.32193	1.83379	1.96012	1.44244	1.4254	1.34519	1.44738	1.27821	1.10151	1.11945	1.18064	0.983922	1.10604	1.26508	0.957749	1.51722	1.52753
simsample195	-57.65	4421760	3.34912	2.7469	0.00391872	0.00391872	6.16729	5.95824	0.0957597	5	3.42221	3.30019	3.61491	3.54663	3.98762	4.13826	3.72152	3.82343	3.73169	3.15256	4.11047	3.98046	3.95611	3.84037	4.12433	4.3015	2.32585	2.44584	3.07548	2.48932	1.77058	2.23326	2.33439	1.85902	1.9884	1.4661	1.44606	1.3667	1.46966	1.30081	1.12722	1.14735	1.20966	1.00981	1.13263	1.29578	0.988635	1.56053	1.57542
simsample196	-51.5	4948380	3.39403	2.8507	0.0039877	0.0039877	5.83438	5.69077	0.106697	5	3.2914	3.15255	3.48134	3.42242	3.8149	4.01151	3.5719	3.68089	3.60113	3.01157	3.93709	3.84761	3.80878	3.71904	3.96302	4.16724	2.28793	2.41782	3.02741	2.46348	1.74644	2.20048	2.30343	1.83223	1.95728	1.44518	1.42935	1.34619	1.44772	1.28021	1.10593	1.12222	1.18184	0.987084	1.10601	1.26667	0.964518	1.51747	1.53217
simsample197	-50.35	4144130	3.31942	2.76686	0.00385577	0.00385577	6.05846	6.0708	0.0820228	5	3.60672	3.50635	3.80246	3.71447	4.22087	4.32053	3.93245	4.03158	3.91671	3.34362	4.33853	4.16196	4.16558	4.00395	4.33935	4.47402	2.38451	2.49219	3.15207	2.54337	1.82027	2.29798	2.38764	1.89832	2.03463	1.49843	1.47113	1.39232	1.49692	1.33001	1.15565	1.18078	1.24002	1.03562	1.16192	1.32568	1.01878	1.61166	1.61995
simsample198	-55.1	4456200	3.35635	2.76895	0.00392494	0.00392494	5.98279	6.07514	0.107567	5	3.33937	3.19591	3.53484	3.47631	3.88011	4.0752	3.62153	3.73058	3.65442	3.0505	3.99026	3.8958	3.8531	3.76826	4.01392	4.2226	2.3173	2.45368	3.06934	2.49965	1.77274	2.23559	2.34299	1.86613	1.99604	1.47277	1.45517	1.3732	1.47652	1.30518	1.12985	1.14626	1.20704	1.00822	1.12938	1.29584	0.984905	1.55055	1.56487
simsample199	-55	4421030	3.36253	2.75097	0.00387861	0.00387861	6.02987	6.11729	0.0936925	5	3.461	3.33899	3.65365	3.57722	4.03183	4.17765	3.76202	3.86918	3.77405	3.19343	4.15819	4.02167	4.00051	3.8737	4.16717	4.33771	2.33394	2.45391	3.09473	2.5045	1.78345	2.25648	2.35613	1.8694	1.99883	1.47187	1.45097	1.36965	1.4714	1.30278	1.12856	1.15044	1.20939	1.00987	1.13271	1.29586	0.987569	1.56281	1.57392
simsample200	-54.6	4858800	3.35559	2.78952	0.00402269	0.00402269	5.88977	5.48133	0.11969	5	3.15671	2.99452	3.35253	3.31538	3.66187	3.89475	3.424	3.53104	3.46788	2.86552	3.7589	3.70648	3.63415	3.57655	3.78413	4.01814	2.24463	2.39385	2.98129	2.43596	1.72291	2.16888	2.27684	1.81983	1.94425	1.43734	1.42427	1.33893	1.44214	1.2711	1.09975	1.11295	1.1731	0.97889	1.09828	1.26332	0.955737	1.50367	1.52349
simsample201	-48.25	4448380	3.33973	2.67462	0.00389468	0.00389468	5.60051	5.93058	0.0938732	5	3.47739	3.3604	3.6843	3.6102	4.0716	4.21755	3.79351	3.89285	3.80026	3.21079	4.18598	4.04268	4.02099	3.89716	4.18797	4.35069	2.34325	2.46566	3.10983	2.51761	1.79237	2.26774	2.36497	1.87863	2.00946	1.47836	1.45834	1.37713	1.47861	1.31213	1.13783	1.15939	1.22136	1.0185	1.14409	1.30992	0.998965	1.58063	1.59391
simsample202	-51	4903940	3.37611	2.81626	0.00401067	0.00401067	5.5859	5.59983	0.115456	5	3.19743	3.04157	3.39491	3.35031	3.71471	3.93257	3.47162	3.57653	3.50756	2.91079	3.81354	3.74918	3.69034	3.62235	3.84322	4.06519	2.25869	2.40014	2.99279	2.43736	1.72115	2.1716	2.27878	1.81697	1.9384	1.4322	1.42332	1.34049	1.44056	1.27205	1.09941	1.11313	1.17185	0.978332	1.09614	1.25896	0.954785	1.49827	1.5149
simsample203	-56.65	4515220	3.35591	2.70793	0.00393409	0.00393409	5.90618	5.92102	0.0998403	5	3.37023	3.24067	3.5634	3.49642	3.92395	4.09081	3.65986	3.76271	3.67942	3.08984	4.03556	3.9201	3.88727	3.78344	4.05817	4.24209	2.29586	2.42341	3.04704	2.47051	1.75273	2.21245	2.31201	1.83936	1.96811	1.45091	1.43132	1.35186	1.45131	1.28585	1.11371	1.13189	1.19304	0.995936	1.11816	1.28005	0.972654	1.53745	1.55143
simsample204	-62.25	5487060	3.42195	2.50249	0.0040362	0.0040362	6.02796	5.78134	0.127956	5	3.1332	2.95814	3.33123	3.28428	3.61843	3.88371	3.3943	3.51104	3.45873	2.83353	3.75455	3.71208	3.63312	3.5881	3.78932	4.04338	2.24095	2.39748	3.00025	2.44785	1.70947	2.16608	2.28482	1.81316	1.94099	1.42501	1.41864	1.32965	1.43439	1.26274	1.08665	1.09813	1.16128	0.962343	1.07838	1.2408	0.931755	1.47416	1.4949
simsample205	-59.9	5407390	3.42402	2.61579	0.00401512	0.00401512	6.07969	5.72924	0.117	5	3.22114	3.06055	3.41816	3.36028	3.7307	3.96142	3.49849	3.6119	3.54251	2.93334	3.86789	3.79674	3.74001	3.6658	3.89418	4.12509	2.26445	2.41323	3.02077	2.45953	1.72596	2.18481	2.29056	1.81462	1.94279	1.42762	1.41754	1.33271	1.43607	1.26523	1.09128	1.10353	1.16494	0.968932	1.08833	1.25154	0.943825	1.49237	1.50637
simsample206	-50.95	4987230	3.40317	2.85465	0.00398526	0.00398526	5.81402	5.72726	0.102097	5	3.34222	3.20298	3.53004	3.46458	3.87366	4.05237	3.62916	3.73858	3.65331	3.0703	4.00464	3.90205	3.86354	3.76851	4.02874	4.21806	2.30231	2.42624	3.04667	2.47917	1.75733	2.21557	2.31552	1.8404	1.96523	1.45028	1.4314	1.34957	1.44814	1.28125	1.1066	1.12542	1.18202	0.987506	1.10721	1.26624	0.96289	1.51522	1.52832
simsample207	-53.35	4795290	3.35541	2.84296	0.00403247	0.00403247	5.81858	5.57324	0.124942	5	3.12619	2.95484	3.32301	3.29606	3.62778	3.87267	3.38862	3.49785	3.43961	2.82999	3.70839	3.67459	3.59958	3.54863	3.73726	3.98553	2.24637	2.4015	2.98496	2.44518	1.72057	2.16856	2.28608	1.83129	1.95379	1.4445	1.43509	1.35024	1.45424	1.2819	1.10911	1.11992	1.18051	0.984783	1.10178	1.2674	0.959953	1.50769	1.52818
simsample208	-50.25	4526500	3.36248	2.77935	0.00390849	0.00390849	5.75689	5.9281	0.091468	5	3.47153	3.35304	3.65836	3.57972	4.04321	4.18703	3.78075	3.88692	3.78671	3.20817	4.17486	4.02852	4.01496	3.88737	4.18618	4.34993	2.33993	2.45479	3.09	2.49984	1.78252	2.24876	2.34729	1.8638	1.99374	1.46922	1.45094	1.36973	1.47369	1.30446	1.13059	1.15106	1.20939	1.00881	1.13324	1.29715	0.990326	1.56018	1.5724
simsample209	-54.25	4320790	3.32834	2.81664	0.00396448	0.00396448	5.86063	5.89588	0.112288	5	3.25718	3.10269	3.45214	3.41284	3.79318	4.0024	3.54143	3.64287	3.56522	2.9693	3.87833	3.80412	3.74786	3.67382	3.89936	4.11515	2.28588	2.42301	3.02335	2.47146	1.75205	2.20464	2.31461	1.85193	1.97695	1.462	1.44726	1.3645	1.46694	1.29791	1.12278	1.13888	1.19981	1.00134	1.12372	1.29197	0.982139	1.544	1.56262
simsample210	-53.3	4635220	3.3814	2.81951	0.00395106	0.00395106	5.78151	6	0.103399	5	3.35236	3.21823	3.548	3.48654	3.89583	4.07898	3.63964	3.74761	3.66857	3.07948	4.01283	3.91055	3.87129	3.77105	4.02513	4.21976	2.30818	2.4376	3.05982	2.48726	1.76435	2.22113	2.32146	1.84815	1.97514	1.45649	1.43988	1.35624	1.46038	1.29147	1.11797	1.13454	1.19338	0.995243	1.11739	1.28084	0.975138	1.53543	1.54818
simsample211	-47.35	4451420	3.33357	2.77498	0.00388437	0.00388437	5.83566	5.83723	0.095286	5	3.47999	3.35415	3.67574	3.60939	4.06274	4.21226	3.78261	3.88589	3.79267	3.20129	4.17101	4.04142	4.01849	3.9009	4.18627	4.36235	2.36263	2.48276	3.12532	2.53262	1.80264	2.27574	2.3729	1.88984	2.02096	1.49252	1.47264	1.39255	1.49613	1.32454	1.14745	1.16935	1.23172	1.02968	1.15505	1.32148	1.00812	1.591	1.60385
simsample212	-50.9	4605190	3.37444	2.76721	0.0039048	0.0039048	5.84563	5.96421	0.0955033	5	3.42833	3.30245	3.62058	3.54892	3.99002	4.14319	3.72958	3.83373	3.74558	3.16058	4.12311	3.99614	3.96856	3.84856	4.13273	4.3129	2.32502	2.44619	3.07908	2.4916	1.76942	2.23741	2.33337	1.84872	1.98131	1.4595	1.43921	1.35675	1.45879	1.29054	1.11694	1.13708	1.19681	0.999556	1.12155	1.28072	0.97678	1.54445	1.55571
simsample213	-50.55	5572690	3.41965	2.47662	0.00393697	0.00393697	5.81045	5.61797	0.102521	5	3.40522	3.27129	3.60855	3.5257	3.95662	4.13811	3.69817	3.80914	3.72158	3.11585	4.10542	3.98262	3.9522	3.84164	4.12454	4.31849	2.31066	2.43689	3.08177	2.49292	1.75769	2.23197	2.33013	1.83821	1.97139	1.44506	1.42836	1.34491	1.44692	1.27855	1.10125	1.12068	1.17979	0.982289	1.10619	1.26906	0.958906	1.52639	1.53848
simsample214	-61.45	5424490	3.40738	2.56918	0.0040445	0.0040445	6.09558	5.67718	0.133132	5	3.08926	2.90698	3.28588	3.25255	3.56635	3.83867	3.33351	3.45212	3.40886	2.78114	3.68651	3.66601	3.5752	3.54124	3.72167	3.98703	2.2329	2.40035	2.98888	2.44604	1.70896	2.16269	2.28201	1.81761	1.94472	1.43122	1.42433	1.33672	1.44065	1.26656	1.08894	1.0998	1.16111	0.966471	1.08374	1.25089	0.937787	1.47759	1.49952
simsample215	-49.05	4891810	3.36698	2.81407	0.00401067	0.00401067	5.58738	5.5931	0.120887	5	3.17332	3.01025	3.3674	3.32992	3.68035	3.91717	3.44562	3.55313	3.48845	2.88262	3.77823	3.73064	3.66306	3.60404	3.80433	4.04742	2.26458	2.41165	3.0011	2.45643	1.73026	2.17963	2.29514	1.83332	1.95638	1.44791	1.43844	1.35205	1.45556	1.28417	1.11109	1.12514	1.18462	0.987283	1.10451	1.27006	0.961732	1.50692	1.53014
simsample216	-45.85	5041710	3.38161	2.60006	0.00385831	0.00385831	6.05323	5.82166	0.094178	5	3.57024	3.44481	3.77078	3.68223	4.15112	4.30251	3.87736	3.99482	3.89737	3.28631	4.30386	4.1568	4.14483	4.01472	4.32796	4.49851	2.40221	2.52519	3.19325	2.5778	1.82807	2.31323	2.41248	1.90959	2.04494	1.50322	1.48129	1.39888	1.5059	1.33078	1.15119	1.17056	1.23441	1.02987	1.15597	1.32447	1.00724	1.59861	1.61243
simsample217	-52.45	4369250	3.33595	2.71372	0.00388719	0.00388719	5.96376	5.99087	0.0996322	5	3.41734	3.28966	3.61608	3.54797	3.99161	4.15822	3.72523	3.83038	3.74205	3.14319	4.10347	3.98197	3.95019	3.84148	4.11494	4.29825	2.33353	2.46221	3.09764	2.5121	1.78476	2.25043	2.35261	1.87193	2.00031	1.47636	1.45724	1.37693	1.47946	1.31091	1.13636	1.15515	1.22002	1.01718	1.14038	1.30636	0.997959	1.57776	1.58991
simsample218	-49.05	4371510	3.34557	2.69329	0.00386893	0.00386893	5.64846	5.93778	0.0785792	5	3.58044	3.49352	3.77457	3.67413	4.18594	4.27674	3.90056	4.00511	3.8888	3.32932	4.33126	4.14187	4.14926	3.9841	4.32475	4.45447	2.3502	2.45149	3.11308	2.50544	1.79209	2.26205	2.3492	1.85934	1.99	1.46507	1.43943	1.36114	1.46392	1.30019	1.12902	1.15279	1.21109	1.01121	1.13504	1.29651	0.993355	1.57549	1.58267
simsample219	-48.85	4989640	3.39522	2.6456	0.00384124	0.00384124	6.01319	5.78993	0.0811121	5	3.61612	3.52261	3.81096	3.70397	4.21621	4.32226	3.94479	4.05353	3.94167	3.36693	4.38083	4.18975	4.203	4.04425	4.39517	4.5221	2.376	2.47758	3.14985	2.53407	1.80633	2.2879	2.37473	1.87347	2.00836	1.47465	1.45185	1.37298	1.47654	1.30831	1.13275	1.15476	1.21427	1.01303	1.13794	1.29788	0.991168	1.57302	1.58184
simsample220	-60.8	5434950	3.42193	2.60341	0.00401512	0.00401512	6.07131	5.72185	0.123162	5	3.16662	3.00177	3.36367	3.32024	3.66233	3.91244	3.43848	3.5547	3.49248	2.87682	3.79977	3.74781	3.6782	3.61454	3.82753	4.06799	2.252	2.40741	3.00882	2.45404	1.7212	2.17693	2.28916	1.81759	1.94584	1.4305	1.42096	1.33532	1.43964	1.26639	1.0901	1.10211	1.16451	0.966604	1.08509	1.24595	0.937709	1.48061	1.49924
simsample221	-51.8	4478390	3.33852	2.71068	0.00392607	0.00392607	5.87034	5.93664	0.11031	5	3.3277	3.17673	3.52147	3.4706	3.867	4.07261	3.60999	3.72316	3.64745	3.03799	3.98141	3.89622	3.84567	3.75967	4.00022	4.21708	2.32244	2.46795	3.08395	2.50531	1.77362	2.23917	2.34565	1.87069	1.99683	1.47492	1.46165	1.37696	1.48271	1.31053	1.13351	1.15213	1.2138	1.01188	1.13363	1.3027	0.989149	1.55898	1.57848
simsample222	-53.7	4783270	3.37833	2.79306	0.00397457	0.00397457	5.8977	5.91838	0.118405	5	3.24054	3.07934	3.44172	3.39751	3.75556	3.99129	3.51562	3.62745	3.56242	2.94971	3.86637	3.80986	3.73684	3.67328	3.88818	4.12732	2.29658	2.44843	3.05203	2.49245	1.75997	2.21464	2.32805	1.85813	1.98431	1.46825	1.45586	1.36977	1.47461	1.29984	1.12282	1.13592	1.19786	0.998786	1.12033	1.28811	0.975442	1.53193	1.55219
simsample223	-51	4395830	3.33325	2.76489	0.00391252	0.00391252	5.81635	5.82088	0.0975733	5	3.39806	3.27028	3.59316	3.52144	3.95886	4.11437	3.697	3.80374	3.7151	3.12607	4.0706	3.94234	3.9167	3.80614	4.08486	4.26786	2.31406	2.43529	3.06265	2.48653	1.76868	2.23236	2.33167	1.85628	1.98657	1.46413	1.44554	1.36474	1.46843	1.30177	1.12822	1.14892	1.20954	1.00917	1.13116	1.29629	0.989368	1.56283	1.57784
simsample224	-60.05	5666090	3.43311	2.45127	0.00401672	0.00401672	6.0458	5.88831	0.131374	5	3.16444	2.97802	3.36121	3.31517	3.6425	3.92583	3.42263	3.54679	3.4929	2.85145	3.79349	3.75766	3.67296	3.63045	3.83291	4.09766	2.27051	2.43595	3.04457	2.48568	1.73164	2.19649	2.31833	1.83781	1.96704	1.44481	1.44038	1.35079	1.45809	1.28017	1.09846	1.10854	1.17237	0.972859	1.09236	1.25986	0.940736	1.4915	1.51321
simsample225	-59.65	5473400	3.42923	2.4911	0.00402428	0.00402428	5.91966	6.00661	0.131897	5	3.1509	2.96437	3.35088	3.30642	3.6319	3.91274	3.40897	3.52736	3.47663	2.8376	3.77644	3.73635	3.64709	3.60835	3.80353	4.07253	2.26409	2.42974	3.03573	2.47739	1.72699	2.185	2.30967	1.83187	1.95893	1.44411	1.4367	1.3484	1.45462	1.2767	1.09657	1.10914	1.16954	0.971964	1.08964	1.25763	0.941543	1.48657	1.50901
simsample226	-54.85	4714610	3.36386	2.81641	0.00398849	0.00398849	5.89819	5.62053	0.106416	5	3.25586	3.11496	3.44109	3.38726	3.77601	3.96868	3.53159	3.63587	3.56178	2.9802	3.89165	3.79905	3.75911	3.66929	3.91413	4.11917	2.26472	2.3954	2.99753	2.43747	1.72821	2.17646	2.27835	1.8159	1.94095	1.43387	1.41767	1.3345	1.43774	1.26887	1.0967	1.11389	1.17583	0.980984	1.09886	1.2586	0.958487	1.50784	1.52436
simsample227	-52.65	4866760	3.35987	2.77428	0.00401005	0.00401005	5.85627	5.49699	0.11185	5	3.23215	3.08782	3.42923	3.38283	3.76092	3.96913	3.51366	3.62073	3.55042	2.9553	3.86239	3.78428	3.73231	3.65164	3.88183	4.09668	2.26456	2.39909	2.9991	2.44506	1.72627	2.18082	2.28779	1.82324	1.94935	1.44068	1.42732	1.34291	1.44504	1.27726	1.10547	1.12061	1.18089	0.984163	1.10241	1.26381	0.961005	1.51447	1.5335
simsample228	-47.1	4502430	3.3769	2.7756	0.00384663	0.00384663	5.75694	6.24489	0.0876018	5	3.59746	3.48504	3.78804	3.70142	4.18462	4.31649	3.91772	4.02498	3.92446	3.33374	4.33998	4.17869	4.17047	4.02773	4.34712	4.50488	2.40639	2.51799	3.18178	2.56845	1.8337	2.31457	2.4044	1.90334	2.03874	1.5035	1.48068	1.39946	1.50276	1.33213	1.15291	1.17402	1.23657	1.03253	1.15925	1.32438	1.01201	1.6	1.6097
simsample229	-52.45	4604340	3.37809	2.7797	0.0039048	0.0039048	5.84249	5.96323	0.0930782	5	3.43982	3.32457	3.63314	3.556	4.00483	4.1563	3.7498	3.85176	3.75944	3.17987	4.13874	3.99971	3.98336	3.85746	4.14569	4.31154	2.32157	2.43605	3.06893	2.48578	1.76914	2.23153	2.32739	1.84826	1.97535	1.4556	1.43511	1.356	1.45662	1.29196	1.11824	1.13934	1.19846	1.00066	1.12386	1.28072	0.976419	1.542	1.55464
simsample230	-53.4	4384740	3.34241	2.74786	0.00391017	0.00391017	5.85124	5.89254	0.0957031	5	3.39519	3.27661	3.59437	3.52369	3.96065	4.11325	3.69594	3.79855	3.70649	3.123	4.07273	3.94646	3.92109	3.80115	4.07944	4.2481	2.29793	2.41834	3.04356	2.46786	1.75587	2.21778	2.31662	1.84293	1.97041	1.45454	1.43654	1.35402	1.45571	1.28795	1.11445	1.13628	1.19582	0.998139	1.11944	1.28265	0.979719	1.54684	1.56078
simsample231	-62.7	5530620	3.42782	2.53203	0.0040445	0.0040445	6.07517	5.75361	0.12636	5	3.13936	2.96806	3.3345	3.29036	3.62478	3.88459	3.39963	3.51372	3.45451	2.83343	3.75904	3.71212	3.64069	3.59095	3.79761	4.04433	2.23734	2.39382	2.99027	2.43892	1.70408	2.16157	2.27666	1.80429	1.93047	1.41712	1.409	1.32353	1.42852	1.25808	1.08229	1.09413	1.15351	0.960491	1.0756	1.23832	0.931199	1.47222	1.49114
simsample232	-51.55	5664160	3.43087	2.51841	0.00396596	0.00396596	5.90904	5.65871	0.110744	5	3.3305	3.18016	3.52902	3.45755	3.85144	4.06431	3.61071	3.7279	3.65115	3.03843	4.00951	3.91263	3.86685	3.77862	4.03987	4.25635	2.30294	2.44216	3.07631	2.49326	1.75212	2.22442	2.32944	1.84153	1.97323	1.44715	1.43285	1.34896	1.45221	1.28089	1.10271	1.11817	1.17958	0.97991	1.10067	1.26353	0.95016	1.50858	1.52284
simsample233	-54.35	4224850	3.29733	2.76675	0.00394054	0.00394054	6.00986	5.73459	0.108683	5	3.2872	3.14191	3.48399	3.44059	3.83736	4.02959	3.5714	3.67476	3.59809	3.00423	3.92297	3.83569	3.78745	3.70218	3.93596	4.14096	2.29195	2.42999	3.0348	2.47589	1.75623	2.21015	2.31951	1.85562	1.98441	1.46743	1.45066	1.36774	1.47172	1.30207	1.12886	1.14637	1.20686	1.00795	1.13123	1.29801	0.989721	1.55425	1.57313
simsample234	-48.8	5265620	3.41578	2.66257	0.00391472	0.00391472	6.04658	5.8134	0.100667	5	3.451	3.3119	3.64419	3.56704	3.99661	4.17985	3.74679	3.86027	3.77306	3.16584	4.14813	4.0273	3.99862	3.89277	4.17433	4.36349	2.35426	2.48121	3.13109	2.53306	1.79357	2.26962	2.36561	1.87074	1.99994	1.47346	1.45433	1.36995	1.47391	1.30097	1.12265	1.14153	1.20338	1.00117	1.12525	1.28916	0.977761	1.54706	1.56001
simsample235	-49.75	4451740	3.37705	2.83794	0.0038768	0.0038768	5.77171	6.03933	0.0767738	5	3.59527	3.50865	3.7878	3.68173	4.19707	4.27886	3.9191	4.02456	3.9095	3.35455	4.34103	4.14936	4.16276	3.995	4.33848	4.45839	2.3544	2.45242	3.11171	2.50634	1.79736	2.26503	2.34728	1.85661	1.98595	1.46191	1.43697	1.36141	1.4643	1.30092	1.12939	1.15483	1.21375	1.01262	1.13429	1.29139	0.992067	1.5706	1.57796
simsample236	-55.75	4429340	3.34172	2.65171	0.00394847	0.00394847	5.79004	5.95164	0.102335	5	3.35361	3.22272	3.54902	3.49192	3.91065	4.08297	3.64649	3.75008	3.6617	3.0718	4.02555	3.91265	3.87841	3.77425	4.04095	4.23273	2.29858	2.42856	3.04879	2.47241	1.75246	2.21745	2.31721	1.84395	1.97356	1.45349	1.43721	1.35381	1.45774	1.28873	1.11625	1.13367	1.19441	0.997438	1.12027	1.2848	0.974723	1.53968	1.55499
simsample237	-52.8	4787890	3.35551	2.75385	0.00400944	0.00400944	5.74009	5.51732	0.110893	5	3.21978	3.07473	3.41543	3.36673	3.74967	3.94884	3.49645	3.60153	3.52347	2.93477	3.84098	3.76238	3.7117	3.63475	3.8646	4.08076	2.24913	2.38559	2.98193	2.42891	1.71769	2.1671	2.27318	1.81177	1.93482	1.42992	1.41702	1.3332	1.43385	1.26753	1.09479	1.11055	1.16977	0.976441	1.09755	1.2584	0.955521	1.50766	1.5272
simsample238	-51.35	4365760	3.33505	2.7636	0.00391252	0.00391252	5.81641	5.82704	0.0909199	5	3.44656	3.33533	3.64272	3.56427	4.02437	4.15883	3.76049	3.85776	3.75751	3.1851	4.14452	3.99995	3.98499	3.85541	4.15565	4.31515	2.32386	2.43998	3.07551	2.48766	1.77589	2.24087	2.33259	1.85364	1.98323	1.4616	1.43991	1.36077	1.46109	1.29371	1.12203	1.1437	1.20395	1.0055	1.12979	1.2902	0.986678	1.55981	1.57144
simsample239	-48.2	4420080	3.33192	2.78289	0.00388437	0.00388437	5.84868	5.84263	0.0981168	5	3.43701	3.31154	3.639	3.57402	4.00939	4.16667	3.73443	3.837	3.74972	3.15757	4.11342	3.99422	3.96008	3.84455	4.12377	4.30609	2.34361	2.47205	3.10508	2.52047	1.79555	2.26478	2.36893	1.88442	2.01629	1.48831	1.46749	1.38434	1.48873	1.31865	1.14105	1.16113	1.22506	1.02181	1.14444	1.3119	1.0021	1.57857	1.59431
simsample240	-60.9	5349680	3.41609	2.47612	0.00403049	0.00403049	5.94841	5.87821	0.123869	5	3.17808	3.0053	3.37864	3.33214	3.68003	3.93469	3.45273	3.5685	3.5062	2.88286	3.82103	3.75649	3.68698	3.62902	3.8483	4.09246	2.2546	2.40828	3.01876	2.45916	1.71437	2.17619	2.29375	1.81461	1.9453	1.42973	1.41945	1.33511	1.43962	1.26504	1.09124	1.10371	1.16422	0.967463	1.0857	1.2504	0.939026	1.48545	1.502
simsample241	-52.05	4456110	3.35435	2.65444	0.00391788	0.00391788	5.55981	5.94064	0.0912839	5	3.42836	3.31361	3.61804	3.53387	3.99382	4.12899	3.73144	3.83218	3.73591	3.16468	4.13521	3.98687	3.97548	3.84221	4.14151	4.29727	2.29933	2.41134	3.0462	2.46154	1.75025	2.21338	2.30457	1.82847	1.95577	1.44081	1.42039	1.3416	1.44443	1.2811	1.10867	1.13056	1.18911	0.991248	1.11374	1.27324	0.971516	1.53936	1.55234
simsample242	-52.75	4221810	3.31611	2.80582	0.00390935	0.00390935	6.02625	5.76686	0.0873907	5	3.45909	3.35282	3.64594	3.56899	4.03764	4.15754	3.76247	3.86225	3.75936	3.19597	4.15264	4.00046	3.99522	3.85515	4.15573	4.30762	2.31868	2.43109	3.05876	2.47572	1.77343	2.23576	2.32495	1.85176	1.98012	1.46116	1.43731	1.35891	1.46025	1.29689	1.1263	1.14879	1.2096	1.01251	1.13551	1.29457	0.992328	1.56856	1.57765
simsample243	-58.65	4424250	3.33347	2.6579	0.00398536	0.00398536	5.8044	5.87448	0.113211	5	3.22908	3.07634	3.42255	3.37515	3.75619	3.96219	3.50618	3.61249	3.53739	2.93817	3.8587	3.78335	3.73031	3.65386	3.88496	4.10353	2.26275	2.4075	3.00708	2.44805	1.73058	2.18249	2.29085	1.82602	1.95142	1.44067	1.42912	1.34508	1.4488	1.27793	1.10524	1.12044	1.1805	0.98756	1.10639	1.27421	0.964708	1.52142	1.53738
simsample244	-55.4	4779820	3.39053	2.80648	0.00397457	0.00397457	5.87219	5.83693	0.102264	5	3.31932	3.18336	3.50609	3.44187	3.85298	4.03272	3.60469	3.71055	3.63114	3.0498	3.98061	3.87238	3.83773	3.73521	3.99405	4.18618	2.28375	2.41016	3.02277	2.4547	1.74267	2.19889	2.29715	1.82442	1.95114	1.4398	1.42165	1.34139	1.44051	1.27192	1.09964	1.11629	1.17681	0.982912	1.10343	1.2621	0.958874	1.51138	1.52454
simsample245	-53.55	4823690	3.38545	2.7947	0.00398355	0.00398355	5.79454	5.64672	0.094664	5	3.35588	3.23887	3.5455	3.47074	3.90089	4.0555	3.65647	3.75504	3.66299	3.09426	4.03161	3.89917	3.87866	3.76247	4.04293	4.21113	2.27091	2.38557	3.0066	2.43777	1.73413	2.18717	2.28174	1.81003	1.93537	1.42768	1.40821	1.32889	1.42773	1.26497	1.095	1.11406	1.17447	0.979235	1.09939	1.25772	0.958212	1.51126	1.5212
simsample246	-48.25	5139840	3.41645	2.64663	0.00387816	0.00387816	5.97853	5.97969	0.0918072	5	3.56866	3.45081	3.77066	3.67121	4.14628	4.2969	3.88166	3.99342	3.88955	3.28929	4.30457	4.14832	4.13128	3.99893	4.31325	4.48059	2.38374	2.50075	3.16772	2.55798	1.81695	2.30117	2.39468	1.88926	2.02308	1.4853	1.46621	1.38619	1.49041	1.32077	1.14037	1.16072	1.22404	1.01797	1.14175	1.30394	0.990926	1.57364	1.58386
simsample247	-58.2	4437590	3.34881	2.72791	0.00393117	0.00393117	6.10946	5.94158	0.100961	5	3.35785	3.22684	3.55327	3.4901	3.91155	4.08193	3.65545	3.76553	3.67452	3.08576	4.03003	3.91574	3.88001	3.77376	4.04129	4.23159	2.29889	2.42535	3.04391	2.4694	1.75361	2.21686	2.31761	1.8417	1.97178	1.45455	1.43562	1.3541	1.45747	1.28887	1.11684	1.13509	1.19426	0.998281	1.12059	1.28463	0.977443	1.54377	1.55642
simsample248	-51.45	4785790	3.34377	2.75669	0.00401374	0.00401374	5.76314	5.48546	0.118196	5	3.18214	3.02521	3.37957	3.33872	3.69229	3.91589	3.44554	3.55339	3.48498	2.88429	3.78305	3.72507	3.66484	3.60353	3.81459	4.04711	2.25634	2.39911	2.9899	2.44079	1.72277	2.17047	2.28198	1.82524	1.95105	1.44268	1.43156	1.34703	1.44903	1.27837	1.10702	1.118	1.17929	0.98204	1.10141	1.26518	0.958818	1.51249	1.5333
simsample249	-52.7	4234550	3.30123	2.80851	0.00392328	0.00392328	6.02058	5.67253	0.0974198	5	3.37991	3.25134	3.57539	3.51496	3.94784	4.1055	3.67986	3.77788	3.68567	3.10632	4.04067	3.92168	3.89096	3.7789	4.04714	4.2261	2.30535	2.43026	3.04561	2.47483	1.76443	2.22116	2.31985	1.85325	1.98312	1.46512	1.44733	1.36486	1.46881	1.30146	1.13071	1.14958	1.2091	1.0098	1.13077	1.29608	0.991049	1.56257	1.57776
simsample250	-51.25	4194700	3.30206	2.79903	0.00390935	0.00390935	6.0171	5.75576	0.0920091	5	3.45251	3.33959	3.65403	3.58362	4.04358	4.18243	3.76712	3.86291	3.76316	3.18458	4.14094	4.00152	3.98153	3.85262	4.14803	4.30638	2.33299	2.45181	3.08057	2.49548	1.78362	2.24912	2.34416	1.86939	1.99911	1.4752	1.45595	1.37366	1.47628	1.30995	1.13739	1.15962	1.22201	1.02027	1.14345	1.3072	1.00204	1.58049	1.5923
simsample251	-57.95	4180260	3.31448	2.80604	0.00394916	0.00394916	6.02454	5.87942	0.103377	5	3.31417	3.18014	3.50716	3.45462	3.86701	4.04146	3.59999	3.70579	3.62027	3.03522	3.95144	3.85406	3.81664	3.72221	3.97063	4.16265	2.28503	2.41453	3.02314	2.45787	1.74895	2.2034	2.30685	1.8447	1.9714	1.45646	1.43955	1.35703	1.46005	1.29484	1.12207	1.14083	1.20105	1.00322	1.12381	1.2888	0.982472	1.54747	1.56509
simsample252	-46.3	4597010	3.36393	2.78568	0.00386747	0.00386747	5.73792	5.88944	0.08697	5	3.55211	3.44258	3.74764	3.65214	4.13865	4.26759	3.87184	3.9728	3.86965	3.28823	4.27097	4.11077	4.10539	3.96652	4.27963	4.42862	2.3698	2.48156	3.13201	2.53475	1.8089	2.28504	2.37654	1.8842	2.01828	1.48663	1.46396	1.38609	1.48737	1.31881	1.1422	1.16478	1.22383	1.02349	1.1486	1.30835	0.999804	1.58167	1.59497
simsample253	-53.75	4153140	3.29903	2.7836	0.00392178	0.00392178	5.94019	5.65916	0.0903968	5	3.39085	3.27992	3.57408	3.50695	3.95988	4.08693	3.68842	3.78903	3.6912	3.12759	4.06144	3.92286	3.91374	3.78342	4.06832	4.22447	2.28015	2.39312	3.01096	2.44108	1.74156	2.19476	2.28809	1.82565	1.95199	1.44188	1.41995	1.34073	1.44358	1.28054	1.11281	1.13625	1.19736	0.999775	1.12189	1.28257	0.983043	1.55377	1.56585
simsample254	-52.65	4243510	3.32224	2.75801	0.00393468	0.00393468	5.79651	5.98468	0.10622	5	3.33101	3.1874	3.52813	3.47741	3.8829	4.0689	3.61719	3.72069	3.64072	3.04626	3.9784	3.88501	3.83744	3.74757	3.9945	4.19628	2.30428	2.43945	3.05493	2.48672	1.76346	2.22368	2.33263	1.85906	1.98827	1.46972	1.45506	1.3708	1.47456	1.30327	1.12833	1.14573	1.20664	1.00928	1.13054	1.29594	0.987268	1.55696	1.57447
simsample255	-56.85	4397000	3.33346	2.81026	0.00396448	0.00396448	5.97606	5.88251	0.117965	5	3.21142	3.05445	3.40919	3.37314	3.73794	3.96349	3.48563	3.59091	3.52269	2.91506	3.82053	3.76603	3.69674	3.63577	3.84864	4.07748	2.27752	2.42706	3.02076	2.46474	1.74361	2.19453	2.3066	1.84618	1.97026	1.4553	1.4428	1.35682	1.46193	1.29182	1.11941	1.13468	1.19367	0.998131	1.11803	1.28649	0.976629	1.53139	1.5505
simsample256	-59.75	5428600	3.40041	2.43563	0.00403049	0.00403049	5.92451	5.82945	0.136706	5	3.11961	2.92854	3.32017	3.29002	3.60301	3.89588	3.37332	3.49188	3.44225	2.79551	3.73076	3.70301	3.60401	3.57319	3.75116	4.03202	2.25998	2.43599	3.03749	2.48313	1.72573	2.18919	2.31599	1.83945	1.97022	1.45032	1.44542	1.35398	1.46369	1.28272	1.10206	1.11337	1.17533	0.975823	1.09807	1.27012	0.949875	1.50261	1.52701
simsample257	-52.55	4184700	3.31627	2.78826	0.00391545	0.00391545	5.98774	5.97053	0.101797	5	3.37145	3.23546	3.56508	3.50838	3.93433	4.10859	3.66855	3.76936	3.68795	3.09532	4.03344	3.92771	3.89083	3.78614	4.04584	4.22882	2.31415	2.44712	3.06219	2.49073	1.77244	2.23434	2.33879	1.8656	1.99569	1.47528	1.45779	1.37635	1.47911	1.30935	1.13528	1.15426	1.21646	1.01892	1.14079	1.31034	0.998914	1.57225	1.58655
simsample258	-46.8	4479420	3.36499	2.80234	0.00385597	0.00385597	5.66783	5.97677	0.0804515	5	3.59338	3.4982	3.78988	3.68839	4.19557	4.28941	3.92105	4.02479	3.91203	3.34217	4.32963	4.14852	4.15411	3.99264	4.32846	4.45562	2.3681	2.471	3.12811	2.52513	1.80904	2.28565	2.37253	1.88028	2.00889	1.47937	1.45249	1.37655	1.4781	1.31528	1.14188	1.16663	1.22526	1.02233	1.14801	1.30688	1.00101	1.58385	1.59245
simsample259	-52.4	4921990	3.40849	2.82328	0.00395052	0.00395052	5.96565	5.89822	0.097232	5	3.41487	3.28614	3.60566	3.53051	3.96525	4.13324	3.71878	3.8249	3.73717	3.15096	4.1075	3.98165	3.9569	3.83674	4.1167	4.29417	2.32573	2.44301	3.07544	2.4953	1.76934	2.23557	2.32969	1.84828	1.97875	1.45871	1.44065	1.36126	1.46144	1.28983	1.11511	1.13532	1.19314	0.993617	1.11453	1.27356	0.96877	1.52984	1.54195
simsample260	-54.55	5237370	3.40802	2.65667	0.00398355	0.00398355	6.10311	5.84068	0.118209	5	3.27476	3.10817	3.47298	3.41913	3.78648	4.02356	3.54315	3.65929	3.59193	2.97174	3.914	3.85228	3.78982	3.7228	3.94825	4.18697	2.30785	2.45704	3.07396	2.50651	1.7608	2.2248	2.33683	1.85773	1.98993	1.46589	1.45411	1.37051	1.47407	1.29877	1.11846	1.13391	1.19488	0.996269	1.11686	1.28225	0.967359	1.52547	1.54503
simsample261	-59.65	5502820	3.41867	2.56543	0.00401311	0.00401311	6.16784	5.71579	0.125989	5	3.17338	2.99988	3.37564	3.32911	3.66577	3.92499	3.43828	3.5583	3.49992	2.87164	3.80353	3.75844	3.67664	3.62124	3.83206	4.08921	2.26652	2.4242	3.02983	2.47087	1.72797	2.18887	2.30683	1.83087	1.96024	1.4415	1.43177	1.34563	1.45025	1.27629	1.0991	1.11008	1.17238	0.974349	1.09081	1.25761	0.943789	1.49103	1.5118
simsample262	-55.25	4351350	3.33495	2.80758	0.00396448	0.00396448	5.8661	5.92476	0.111392	5	3.26686	3.11468	3.45559	3.41333	3.79941	4.0042	3.54432	3.65038	3.57128	2.97375	3.88908	3.81387	3.7647	3.68593	3.91746	4.13616	2.29092	2.433	3.03653	2.47751	1.75515	2.20921	2.31725	1.85231	1.9784	1.46348	1.44716	1.3652	1.46918	1.298	1.12301	1.13828	1.19908	1.00181	1.12149	1.28896	0.978661	1.53992	1.55776
simsample263	-46.35	4430370	3.35648	2.80534	0.00385597	0.00385597	5.69969	5.94864	0.0782647	5	3.61608	3.5229	3.80745	3.71154	4.21849	4.30937	3.94327	4.0408	3.92514	3.36033	4.35598	4.16484	4.18235	4.02144	4.36747	4.48658	2.37418	2.47662	3.1353	2.52591	1.8122	2.28833	2.37188	1.88285	2.01693	1.48517	1.45763	1.37566	1.4752	1.31258	1.13951	1.16363	1.2231	1.02317	1.14915	1.30615	1.00238	1.58639	1.59295
simsample264	-56.55	4415610	3.3309	2.75553	0.00396426	0.00396426	6.04794	5.9442	0.119117	5	3.24153	3.07872	3.44192	3.40561	3.76852	3.99707	3.51053	3.61791	3.54905	2.94058	3.8536	3.80541	3.73463	3.6739	3.88628	4.1221	2.30176	2.45531	3.05587	2.49582	1.76021	2.21556	2.33018	1.86609	1.99548	1.47552	1.46313	1.37648	1.48234	1.30839	1.13169	1.14891	1.21043	1.0114	1.13273	1.30564	0.990354	1.55529	1.57798
simsample265	-50.55	4867580	3.40012	2.82469	0.00390887	0.00390887	5.95962	5.91129	0.0954324	5	3.45732	3.33146	3.64744	3.57448	4.01969	4.18106	3.761	3.87062	3.77773	3.18577	4.1493	4.02295	4.0004	3.88102	4.16712	4.3415	2.34652	2.46533	3.10592	2.51784	1.78776	2.25593	2.35228	1.86469	1.99552	1.47179	1.45595	1.37326	1.4745	1.30556	1.12924	1.14726	1.20557	1.00604	1.12752	1.28668	0.980247	1.54695	1.5608
simsample266	-56.6	4889530	3.37975	2.84349	0.00403555	0.00403555	5.85352	5.63542	0.11926	5	3.1526	2.99186	3.3484	3.30785	3.65145	3.88262	3.41572	3.52651	3.46527	2.86643	3.75652	3.70502	3.63801	3.57629	3.77671	4.01031	2.24318	2.39192	2.97423	2.43054	1.71464	2.15808	2.26873	1.8139	1.93932	1.43428	1.42006	1.33669	1.43859	1.26972	1.09586	1.11123	1.17181	0.977351	1.094	1.25733	0.950987	1.49438	1.51366
simsample267	-53.4	4864550	3.37619	2.85182	0.00403555	0.00403555	5.80932	5.63673	0.117767	5	3.17682	3.01734	3.37218	3.33368	3.68748	3.90947	3.44415	3.54941	3.48973	2.88858	3.78067	3.72341	3.662	3.6018	3.81514	4.04036	2.2576	2.40329	2.99651	2.44761	1.72874	2.17906	2.28399	1.82355	1.94584	1.44015	1.42689	1.33932	1.44388	1.27546	1.10406	1.11672	1.17457	0.978905	1.09761	1.26189	0.955527	1.49846	1.51784
simsample268	-50.35	4519480	3.36171	2.77844	0.00390849	0.00390849	5.74306	5.92287	0.0923019	5	3.4571	3.34091	3.65115	3.57532	4.03646	4.17969	3.7735	3.8797	3.77443	3.19346	4.15498	4.01157	3.99751	3.87047	4.1633	4.33285	2.33208	2.4488	3.08578	2.49996	1.78	2.24789	2.34139	1.85815	1.98618	1.46496	1.44429	1.36474	1.46695	1.30248	1.12824	1.14755	1.20622	1.00606	1.12817	1.28751	0.982403	1.55019	1.56553
simsample269	-57.1	4849650	3.37759	2.7985	0.00403194	0.00403194	5.79321	5.61671	0.110165	5	3.21869	3.07507	3.41432	3.36441	3.74052	3.94167	3.4955	3.603	3.53265	2.94277	3.85143	3.77145	3.71999	3.64163	3.87446	4.08217	2.25017	2.38415	2.97932	2.42471	1.71704	2.16555	2.27077	1.81029	1.93295	1.42768	1.41237	1.33057	1.43006	1.26221	1.09001	1.10538	1.16624	0.972351	1.09084	1.24912	0.947254	1.49249	1.51128
simsample270	-47.5	4619300	3.38087	2.77606	0.00386747	0.00386747	5.68547	5.88031	0.0732255	5	3.63193	3.54954	3.82233	3.71305	4.23985	4.3124	3.96836	4.07233	3.94382	3.39386	4.39459	4.18629	4.20927	4.03008	4.38847	4.49498	2.35758	2.4482	3.1167	2.50591	1.79468	2.27043	2.35063	1.85939	1.98731	1.46188	1.43465	1.35818	1.45864	1.29603	1.12322	1.14983	1.20807	1.00873	1.13452	1.29054	0.990679	1.5713	1.57671
simsample271	-54.55	4840310	3.35428	2.81368	0.00405626	0.00405626	5.76596	5.37801	0.115851	5	3.14307	2.98923	3.3268	3.28749	3.64807	3.85996	3.40392	3.50559	3.44186	2.85731	3.73568	3.67463	3.6163	3.55573	3.76584	3.98507	2.21712	2.35959	2.94067	2.40279	1.69912	2.14103	2.24848	1.79432	1.91564	1.41839	1.4055	1.32349	1.42459	1.2585	1.08906	1.10193	1.16002	0.968126	1.08454	1.24459	0.942905	1.48071	1.49952
simsample272	-53.55	4150890	3.29531	2.77955	0.00395078	0.00395078	6.05343	5.88279	0.109222	5	3.32237	3.17486	3.52539	3.47756	3.87513	4.06768	3.60498	3.7127	3.63581	3.03221	3.9628	3.8746	3.82367	3.74449	3.97888	4.19459	2.32214	2.45956	3.0646	2.49764	1.77356	2.23296	2.34184	1.87626	2.00442	1.48123	1.46521	1.37967	1.48476	1.31381	1.14042	1.15786	1.22154	1.02157	1.14299	1.31599	1.00185	1.57548	1.59437
simsample273	-54.5	4793630	3.38231	2.80549	0.0039701	0.0039701	5.79791	5.74849	0.10543	5	3.28754	3.15012	3.47825	3.41399	3.81465	4.00318	3.56599	3.67126	3.59657	3.01089	3.93357	3.83685	3.80157	3.71019	3.9611	4.15924	2.27736	2.40663	3.01579	2.44671	1.73231	2.18828	2.28894	1.82197	1.94581	1.43466	1.4203	1.33932	1.43972	1.27441	1.10248	1.11941	1.17731	0.979786	1.09808	1.25698	0.956659	1.50894	1.52441
simsample274	-55.4	4447260	3.35916	2.83087	0.00398969	0.00398969	5.68987	5.8982	0.104204	5	3.27945	3.14728	3.47634	3.41408	3.81342	3.9936	3.55946	3.6631	3.58135	3.00434	3.9165	3.82119	3.78052	3.68814	3.93727	4.12694	2.26293	2.39323	3.00168	2.44339	1.73723	2.18842	2.28834	1.82214	1.9497	1.43764	1.42076	1.33921	1.44027	1.27377	1.10272	1.11869	1.17901	0.984621	1.10381	1.26399	0.961053	1.51073	1.52601
simsample275	-49.95	4319830	3.29959	2.67182	0.00394142	0.00394142	5.61977	5.65049	0.103332	5	3.32727	3.19078	3.52256	3.46952	3.88487	4.0526	3.61607	3.71346	3.62642	3.03862	3.97952	3.87072	3.82961	3.72799	3.98989	4.17914	2.28365	2.41638	3.03264	2.4649	1.74843	2.20905	2.31305	1.84677	1.97664	1.45791	1.44238	1.35729	1.46365	1.29518	1.12353	1.14138	1.20133	1.00315	1.12492	1.29366	0.985062	1.55595	1.56887
simsample276	-59.7	4755440	3.3533	2.76547	0.00406406	0.00406406	5.82714	5.51561	0.121079	5	3.09802	2.93305	3.28582	3.2532	3.59516	3.81985	3.35449	3.46262	3.39923	2.80597	3.68757	3.63874	3.56489	3.50904	3.7099	3.93786	2.20426	2.35548	2.93045	2.39634	1.6882	2.12847	2.2405	1.7907	1.91647	1.41611	1.40394	1.31908	1.42304	1.25458	1.08501	1.09866	1.1557	0.964773	1.07913	1.24337	0.942425	1.47999	1.50106
simsample277	-50.75	4292300	3.30084	2.7588	0.00388694	0.00388694	6.09949	5.703	0.0954138	5	3.45289	3.33168	3.64728	3.58606	4.03603	4.18268	3.75976	3.85774	3.76152	3.17709	4.13615	4.01155	3.98743	3.86393	4.14429	4.31632	2.3447	2.47255	3.1064	2.51296	1.79308	2.26108	2.35961	1.88341	2.01458	1.48492	1.46509	1.38434	1.49067	1.32041	1.1472	1.16956	1.22808	1.02714	1.15212	1.32183	1.00941	1.59061	1.60499
simsample278	-50.65	4381500	3.36163	2.81909	0.00388714	0.00388714	5.77797	6.12585	0.0930902	5	3.47148	3.34877	3.66111	3.58386	4.03935	4.18065	3.77018	3.877	3.78283	3.20136	4.16572	4.03024	4.01084	3.89087	4.17991	4.35026	2.35148	2.47141	3.10995	2.52033	1.79556	2.26347	2.36011	1.87436	2.00267	1.47711	1.45898	1.37559	1.47613	1.30811	1.13482	1.15458	1.21484	1.01407	1.1366	1.299	0.994403	1.56684	1.5796
simsample279	-50.3	4405540	3.33543	2.7861	0.00390962	0.00390962	5.94026	5.84568	0.0943596	5	3.45343	3.33355	3.65149	3.57889	4.03155	4.17562	3.75771	3.85747	3.7641	3.18258	4.14466	4.01016	3.99242	3.87004	4.15411	4.3265	2.34258	2.46363	3.09634	2.50793	1.78852	2.25507	2.34844	1.86886	1.99675	1.47517	1.45234	1.37194	1.47869	1.30949	1.13613	1.15642	1.21781	1.01611	1.14056	1.30476	0.998389	1.57616	1.59142
simsample280	-50.15	4485470	3.37388	2.79698	0.0038768	0.0038768	5.84843	6.10734	0.0849807	5	3.56343	3.45884	3.75695	3.66971	4.15647	4.27763	3.88727	3.99278	3.88248	3.30632	4.29772	4.13033	4.12591	3.97644	4.29239	4.43896	2.36631	2.47677	3.13265	2.52695	1.80564	2.28282	2.3747	1.882	2.01283	1.4814	1.45868	1.37847	1.48133	1.31473	1.13966	1.16358	1.22329	1.02135	1.14595	1.30721	1.00009	1.58102	1.58976
simsample281	-52.65	4252680	3.294	2.75686	0.00392139	0.00392139	6.1215	5.73715	0.108726	5	3.32472	3.17583	3.52146	3.47896	3.88025	4.07126	3.61508	3.71777	3.63846	3.03336	3.9572	3.87807	3.8272	3.74185	3.98449	4.19266	2.31742	2.45587	3.06642	2.50248	1.77631	2.23605	2.34423	1.87591	2.0078	1.48124	1.46492	1.3795	1.48589	1.31385	1.1399	1.15703	1.21791	1.01855	1.14238	1.31253	1.00166	1.57563	1.59345
simsample282	-51.2	5114610	3.40693	2.60579	0.0038709	0.0038709	6.13744	5.97576	0.0974445	5	3.51854	3.39037	3.72306	3.6374	4.08754	4.2526	3.82372	3.93504	3.84526	3.23616	4.24391	4.10704	4.08044	3.95793	4.25468	4.43924	2.37948	2.50223	3.16227	2.55724	1.81086	2.29193	2.39252	1.89123	2.02391	1.48812	1.47033	1.38674	1.49229	1.31803	1.13649	1.15615	1.21725	1.01408	1.14035	1.30382	0.989995	1.56816	1.58148
simsample283	-58.15	4175140	3.31592	2.79325	0.00394916	0.00394916	6.01702	5.88621	0.101312	5	3.32542	3.19597	3.5163	3.45822	3.87856	4.04617	3.61724	3.71963	3.63074	3.04904	3.97623	3.87271	3.83618	3.73413	3.98796	4.17863	2.2845	2.4122	3.02262	2.45807	1.74578	2.20214	2.30222	1.83882	1.96394	1.45215	1.43465	1.35243	1.45358	1.2862	1.11524	1.1371	1.19841	1.00021	1.12092	1.28621	0.981004	1.53915	1.55512
simsample284	-59.8	5627380	3.43421	2.45709	0.00401672	0.00401672	6.03189	5.87533	0.123898	5	3.22304	3.05101	3.42679	3.36813	3.71778	3.97617	3.48658	3.60834	3.54568	2.91129	3.87096	3.81	3.73665	3.67503	3.89402	4.14372	2.27656	2.43503	3.05854	2.48937	1.73789	2.20629	2.31953	1.83641	1.96574	1.44511	1.43673	1.34811	1.45475	1.27989	1.09887	1.11264	1.17365	0.973531	1.09457	1.2575	0.944964	1.49712	1.51546
simsample285	-50.45	5007540	3.40894	2.88972	0.00399423	0.00399423	5.66481	5.70745	0.106975	5	3.26304	3.11918	3.45472	3.39173	3.77755	3.97554	3.5449	3.65182	3.57319	2.99133	3.90478	3.81801	3.7744	3.68751	3.92925	4.13757	2.27647	2.40611	3.01032	2.4492	1.7332	2.18596	2.28667	1.81804	1.94064	1.43255	1.41752	1.33722	1.43869	1.26878	1.09815	1.11397	1.17346	0.978361	1.09532	1.2529	0.950815	1.49463	1.50879
simsample286	-59.8	5543680	3.42871	2.47026	0.00402428	0.00402428	5.95806	5.92756	0.130334	5	3.16296	2.97904	3.3634	3.32088	3.64851	3.92517	3.42034	3.54288	3.48677	2.84897	3.79246	3.75295	3.67187	3.62749	3.83026	4.09018	2.2675	2.43395	3.04504	2.48491	1.73319	2.19713	2.31748	1.83492	1.96365	1.44101	1.43633	1.34682	1.45276	1.27702	1.09718	1.10945	1.17133	0.971753	1.09147	1.25999	0.945002	1.49513	1.51535
simsample287	-58.05	4772290	3.39744	2.79575	0.00396518	0.00396518	6.0332	5.9865	0.104119	5	3.33201	3.19864	3.53196	3.46421	3.86637	4.05132	3.61628	3.72675	3.64441	3.05682	3.99217	3.88993	3.85178	3.75911	4.01456	4.21059	2.29655	2.42374	3.03867	2.46839	1.75047	2.20656	2.30486	1.83111	1.95836	1.44837	1.43069	1.34714	1.44882	1.28096	1.10774	1.12475	1.18429	0.988426	1.10734	1.26873	0.962585	1.51744	1.53158
simsample288	-51.4	5667860	3.42802	2.50895	0.00396723	0.00396723	5.89169	5.6441	0.109114	5	3.35789	3.21212	3.56058	3.48709	3.89014	4.10128	3.6494	3.76895	3.68806	3.07119	4.0506	3.95044	3.90387	3.80786	4.06767	4.27642	2.31226	2.44902	3.09145	2.50351	1.76103	2.23146	2.33884	1.84738	1.97929	1.45146	1.43719	1.35355	1.45611	1.28515	1.10791	1.12319	1.18369	0.984368	1.1057	1.27131	0.95751	1.51768	1.52991
simsample289	-46.6	4387240	3.33203	2.71404	0.00387044	0.00387044	5.60778	5.95036	0.0935372	5	3.50431	3.38311	3.70188	3.6223	4.08478	4.23079	3.81114	3.91866	3.82069	3.22699	4.20517	4.06654	4.04687	3.9144	4.21176	4.38409	2.36124	2.48612	3.13642	2.53773	1.80762	2.28097	2.38091	1.89525	2.02887	1.49594	1.47403	1.39256	1.49794	1.3272	1.15057	1.17169	1.23262	1.02855	1.15484	1.32038	1.00889	1.59359	1.60504
simsample290	-49	4556450	3.35343	2.7438	0.00388585	0.00388585	5.84506	5.85907	0.0931509	5	3.47332	3.35275	3.66633	3.59278	4.04728	4.19921	3.78983	3.89386	3.79971	3.20892	4.1774	4.03953	4.01877	3.89171	4.18505	4.35577	2.34657	2.46264	3.10601	2.51402	1.79056	2.26213	2.35829	1.87119	2.00369	1.47608	1.45418	1.37268	1.47336	1.3053	1.13191	1.15316	1.21648	1.0159	1.14061	1.3063	0.995926	1.57295	1.58572
simsample291	-57.6	4265160	3.31042	2.74049	0.00392139	0.00392139	6.17325	5.79441	0.102993	5	3.33712	3.19956	3.53218	3.47766	3.899	4.07124	3.63077	3.7336	3.65006	3.05589	3.99053	3.88926	3.85038	3.75317	4.01408	4.2062	2.29944	2.4301	3.04211	2.47353	1.75595	2.2143	2.31691	1.85019	1.97984	1.46605	1.44969	1.36647	1.46875	1.30036	1.12893	1.14841	1.20841	1.00816	1.13019	1.29622	0.989464	1.55838	1.57481
simsample292	-57.75	4892070	3.41253	2.90317	0.00402296	0.00402296	5.72862	5.84627	0.108445	5	3.23125	3.0882	3.42106	3.36254	3.7384	3.94077	3.50492	3.61005	3.53427	2.95632	3.86103	3.77563	3.73104	3.65259	3.88411	4.09752	2.25655	2.38463	2.97687	2.43083	1.72025	2.16783	2.27184	1.80719	1.9296	1.4262	1.41093	1.32988	1.42994	1.26262	1.09063	1.10502	1.1628	0.969879	1.08741	1.24682	0.945349	1.48468	1.4987
simsample293	-49.85	4527650	3.35999	2.805	0.00391082	0.00391082	5.75247	5.90457	0.0960478	5	3.4265	3.30032	3.62194	3.55138	3.98945	4.14208	3.7279	3.83389	3.74615	3.1605	4.10839	3.97682	3.94812	3.83638	4.12178	4.29645	2.3281	2.45245	3.0865	2.50115	1.77661	2.24246	2.33641	1.86038	1.98704	1.46781	1.4509	1.37003	1.47079	1.30308	1.12913	1.14874	1.2082	1.00927	1.13223	1.29546	0.989808	1.56049	1.57345
simsample294	-61.75	5615510	3.4206	2.47641	0.00402413	0.00402413	6.11317	5.67468	0.127037	5	3.15586	2.97788	3.35516	3.30968	3.64982	3.91295	3.42006	3.53211	3.47502	2.84722	3.7804	3.73101	3.65327	3.60328	3.81179	4.06374	2.24572	2.40413	3.00823	2.45182	1.71169	2.16941	2.28623	1.81285	1.9444	1.42722	1.41793	1.33039	1.43611	1.26289	1.08632	1.09943	1.15991	0.96438	1.08264	1.24691	0.934474	1.48146	1.50145
simsample295	-55.55	4375220	3.35133	2.82171	0.00395082	0.00395082	5.78926	6.041	0.109525	5	3.28324	3.13329	3.47102	3.42252	3.81056	4.01105	3.5646	3.67342	3.59504	3.00237	3.92452	3.83842	3.78757	3.70722	3.94473	4.15001	2.29302	2.4315	3.03732	2.47197	1.75143	2.20908	2.31565	1.84894	1.97455	1.45964	1.44327	1.35957	1.4612	1.2933	1.12061	1.13584	1.19804	1.00086	1.12065	1.28466	0.977848	1.53814	1.55343
simsample296	-47.65	4410840	3.33447	2.77791	0.00389888	0.00389888	5.65347	5.88952	0.0988194	5	3.43253	3.29795	3.62678	3.56575	4.00122	4.16222	3.7315	3.83772	3.74633	3.1574	4.11482	3.99141	3.95727	3.84621	4.12197	4.30872	2.34361	2.46919	3.10174	2.51731	1.79148	2.26168	2.36216	1.88353	2.0159	1.487	1.46514	1.38229	1.48812	1.31837	1.14409	1.16366	1.22448	1.0268	1.14892	1.31489	1.00219	1.58183	1.59757
simsample297	-54.2	4753980	3.35907	2.82305	0.00402651	0.00402651	5.81563	5.54614	0.113242	5	3.18987	3.0417	3.38051	3.33471	3.70498	3.91274	3.46451	3.56975	3.49827	2.91093	3.81108	3.74197	3.68466	3.61201	3.83272	4.04779	2.2434	2.38132	2.96673	2.42238	1.71466	2.15996	2.26145	1.80337	1.93013	1.4274	1.41237	1.32986	1.43257	1.26632	1.0967	1.11259	1.17134	0.977692	1.09533	1.25702	0.954506	1.49844	1.51856
simsample298	-47.6	4395670	3.33053	2.78673	0.00389185	0.00389185	5.66985	5.86756	0.100416	5	3.41453	3.28015	3.61249	3.55597	3.98105	4.15292	3.72168	3.82431	3.74242	3.14742	4.09912	3.98304	3.94773	3.84051	4.10495	4.29357	2.34333	2.47186	3.10198	2.52488	1.79506	2.26056	2.35857	1.88103	2.00844	1.48387	1.46443	1.38165	1.48445	1.31318	1.13976	1.15766	1.22087	1.0194	1.14354	1.30828	0.998743	1.57521	1.59187
simsample299	-60.85	5453230	3.43189	2.46863	0.00402428	0.00402428	5.88123	6.0106	0.126783	5	3.17855	2.99858	3.37258	3.32419	3.66139	3.93148	3.43808	3.55964	3.50003	2.86947	3.81255	3.7633	3.69067	3.6398	3.84761	4.09613	2.25811	2.41918	3.03209	2.46947	1.72113	2.18355	2.30214	1.82251	1.95442	1.43522	1.42811	1.34112	1.44797	1.27162	1.09443	1.10617	1.16797	0.971737	1.08952	1.25486	0.942459	1.49058	1.50914
simsample300	-50.8	4433490	3.35369	2.6979	0.00388718	0.00388718	5.73325	6.13278	0.0984729	5	3.45342	3.32285	3.65271	3.57973	4.02391	4.19026	3.7617	3.86745	3.77309	3.17108	4.13853	4.01705	3.98968	3.87661	4.15975	4.34072	2.34806	2.47626	3.11434	2.52829	1.79752	2.27197	2.36915	1.88223	2.01344	1.48283	1.46446	1.38069	1.48487	1.31664	1.13892	1.1598	1.2209	1.0167	1.14327	1.30885	0.997643	1.57736	1.59221
simsample301	-53.45	5435010	3.43679	2.67643	0.00395988	0.00395988	5.96446	5.71884	0.0991411	5	3.3997	3.26539	3.58795	3.50537	3.93116	4.10618	3.69378	3.80874	3.71731	3.12322	4.09831	3.97191	3.94314	3.82922	4.11348	4.30151	2.31111	2.42913	3.06496	2.47817	1.75424	2.22065	2.31703	1.83071	1.9576	1.4396	1.4239	1.34373	1.44652	1.27651	1.10037	1.11882	1.17916	0.982415	1.10324	1.26037	0.954435	1.5106	1.52213
simsample302	-56.25	4220770	3.30721	2.82302	0.00394785	0.00394785	5.93244	5.7556	0.107194	5	3.27774	3.13513	3.46802	3.41772	3.81668	4.00663	3.56178	3.65993	3.58222	2.9925	3.90601	3.82155	3.77629	3.69138	3.92785	4.12996	2.28141	2.41162	3.01596	2.46105	1.74955	2.20306	2.30613	1.84656	1.97373	1.45908	1.44208	1.35991	1.46414	1.29241	1.12183	1.13889	1.19862	1.00178	1.12213	1.29163	0.984721	1.54781	1.56476
simsample303	-49.7	4362130	3.33947	2.7795	0.00389748	0.00389748	5.86251	6.10109	0.109079	5	3.36437	3.21716	3.56429	3.51305	3.90719	4.10634	3.64872	3.76284	3.67887	3.07225	4.01385	3.92481	3.86744	3.78325	4.02328	4.24048	2.34146	2.48066	3.10211	2.53017	1.79312	2.26083	2.36728	1.88959	2.01917	1.49153	1.47463	1.38895	1.49634	1.32284	1.14503	1.16271	1.22407	1.02208	1.14627	1.31524	1.00087	1.57393	1.59462
simsample304	-51.45	4413930	3.33402	2.73494	0.00390276	0.00390276	5.86461	5.85316	0.0971496	5	3.42095	3.29711	3.61669	3.54988	3.99617	4.1546	3.72933	3.83097	3.73234	3.14333	4.10115	3.9811	3.95702	3.84174	4.12044	4.30271	2.33113	2.45364	3.08515	2.50162	1.77942	2.24523	2.34368	1.86454	1.99497	1.47235	1.45301	1.37253	1.47577	1.30503	1.12953	1.14906	1.21041	1.01118	1.13259	1.29852	0.991775	1.5685	1.58218
simsample305	-47.55	4357110	3.3523	2.8093	0.00385628	0.00385628	5.69716	5.96702	0.0767613	5	3.61211	3.5237	3.80543	3.70666	4.22663	4.30618	3.94593	4.04399	3.92639	3.36931	4.36011	4.16788	4.18338	4.01223	4.35479	4.47225	2.36578	2.47011	3.13067	2.52497	1.80984	2.28548	2.36897	1.87675	2.0069	1.47709	1.45017	1.37294	1.47473	1.31056	1.13666	1.16059	1.21947	1.01952	1.14489	1.30499	1.0034	1.58833	1.59414
simsample306	-53.1	5696350	3.43126	2.4847	0.00396723	0.00396723	5.88989	5.61389	0.107524	5	3.34682	3.19781	3.54127	3.46302	3.86847	4.06838	3.62445	3.74498	3.66012	3.05154	4.03	3.92708	3.88642	3.78571	4.05537	4.2641	2.29596	2.43016	3.0702	2.48494	1.74641	2.21575	2.32083	1.82949	1.95967	1.43729	1.42403	1.34332	1.44508	1.27284	1.09648	1.11253	1.17201	0.974345	1.09527	1.25514	0.946815	1.50453	1.51937
simsample307	-51.5	5348250	3.44364	2.7197	0.00391708	0.00391708	6.0635	5.89511	0.0918783	5	3.51647	3.39928	3.70942	3.61737	4.07532	4.22902	3.82454	3.93539	3.83704	3.2452	4.2382	4.09439	4.08393	3.94596	4.25702	4.42743	2.36088	2.47333	3.12923	2.52639	1.79395	2.26977	2.35909	1.85943	1.99254	1.46506	1.44469	1.3645	1.46709	1.2963	1.11853	1.14032	1.20052	0.998997	1.12209	1.27832	0.971348	1.53721	1.54726
simsample308	-51	4321960	3.33678	2.80345	0.00389786	0.00389786	5.76669	5.86176	0.0893651	5	3.45492	3.34495	3.65049	3.56999	4.03587	4.16078	3.75948	3.86314	3.76753	3.19542	4.1557	4.00538	3.98758	3.8553	4.15467	4.3041	2.31621	2.43046	3.06442	2.48247	1.77307	2.23695	2.33044	1.85397	1.98141	1.46144	1.43982	1.36236	1.46392	1.2988	1.12599	1.14883	1.20615	1.00742	1.12918	1.29157	0.988861	1.56245	1.57484
simsample309	-52.3	4406640	3.35617	2.83469	0.0039053	0.0039053	6.05644	6.10413	0.105164	5	3.36987	3.2266	3.56433	3.51132	3.91851	4.10503	3.66318	3.77273	3.68805	3.08904	4.02632	3.92898	3.88332	3.78626	4.04496	4.24572	2.33343	2.46875	3.08788	2.51226	1.78181	2.24839	2.35428	1.87892	2.00946	1.48501	1.46914	1.38336	1.48791	1.31556	1.14072	1.15838	1.21942	1.01798	1.14106	1.306	0.99341	1.56306	1.58315
simsample310	-60.75	5464320	3.4183	2.59017	0.0040481	0.0040481	6.05341	5.71965	0.128672	5	3.13281	2.9538	3.32983	3.28833	3.61449	3.88267	3.39205	3.50614	3.45206	2.83016	3.75137	3.71382	3.63577	3.59325	3.78895	4.04539	2.25563	2.41523	3.00826	2.4594	1.71944	2.17517	2.29194	1.82203	1.94649	1.43476	1.43038	1.3391	1.44522	1.27144	1.09518	1.10642	1.16671	0.969834	1.08728	1.25318	0.940792	1.48681	1.5058
simsample311	-48.3	4327650	3.32903	2.79943	0.00389786	0.00389786	5.76585	5.84247	0.0919223	5	3.4604	3.34313	3.65141	3.58089	4.04163	4.17875	3.7687	3.86999	3.77638	3.19789	4.15093	4.0115	3.99375	3.86826	4.15907	4.32157	2.33342	2.45275	3.08301	2.49655	1.78332	2.24905	2.34846	1.87012	1.99865	1.47371	1.45395	1.37386	1.47614	1.30982	1.13656	1.15649	1.2185	1.01888	1.1413	1.3048	0.997468	1.57419	1.58451
simsample312	-49.8	5588750	3.42546	2.48914	0.00395068	0.00395068	5.82676	5.67213	0.103091	5	3.41046	3.27296	3.61211	3.52915	3.95832	4.14708	3.7088	3.82346	3.73603	3.1226	4.11788	3.99252	3.95409	3.84579	4.13139	4.32332	2.31537	2.44567	3.09277	2.49941	1.76269	2.24035	2.34234	1.84488	1.97686	1.45088	1.43277	1.35292	1.45728	1.2882	1.10906	1.12715	1.1878	0.987164	1.10957	1.27047	0.960749	1.52781	1.53845
simsample313	-53.1	4200900	3.30201	2.79629	0.00392328	0.00392328	5.98241	5.64371	0.0964651	5	3.33857	3.21484	3.52608	3.4677	3.90251	4.04837	3.63514	3.73113	3.64022	3.06864	3.98907	3.87788	3.84769	3.73685	4.00652	4.17933	2.27462	2.39333	3.00599	2.44139	1.74131	2.19288	2.29253	1.83042	1.95859	1.44719	1.42771	1.34778	1.44917	1.28354	1.1134	1.13071	1.18934	0.995743	1.11538	1.27946	0.979345	1.54344	1.55748
simsample314	-49.4	4468870	3.3441	2.65544	0.00391788	0.00391788	5.55911	5.88085	0.0953127	5	3.41445	3.30035	3.61808	3.54574	3.99074	4.13588	3.71523	3.8233	3.72454	3.14688	4.11122	3.97461	3.95239	3.83165	4.12365	4.29385	2.30672	2.42752	3.06393	2.47908	1.76054	2.22602	2.32171	1.8405	1.97211	1.45242	1.43416	1.35321	1.4578	1.29104	1.11725	1.13938	1.19674	0.998257	1.1192	1.28157	0.976861	1.54686	1.56294
simsample315	-49.35	4498080	3.36989	2.82519	0.0038768	0.0038768	5.81778	6.05261	0.0893426	5	3.52085	3.40966	3.71809	3.63175	4.09686	4.22761	3.8291	3.93881	3.8393	3.25851	4.24229	4.08958	4.07584	3.94195	4.24564	4.40014	2.36198	2.47377	3.1198	2.52105	1.80263	2.27494	2.3682	1.87852	2.00758	1.48166	1.46156	1.38045	1.48375	1.31428	1.13778	1.15994	1.2204	1.01881	1.14454	1.30707	0.998802	1.57755	1.58746
simsample316	-52.3	4392910	3.33689	2.79643	0.00390962	0.00390962	5.94026	5.84927	0.0973435	5	3.40532	3.27911	3.59695	3.53118	3.97041	4.12834	3.70194	3.80397	3.712	3.13166	4.07892	3.95315	3.93071	3.81801	4.08969	4.27386	2.3238	2.44847	3.07809	2.49641	1.77545	2.2401	2.33871	1.8588	1.98893	1.46933	1.45011	1.37024	1.47364	1.30285	1.12783	1.14894	1.21	1.01074	1.1336	1.29767	0.990713	1.5613	1.57753
simsample317	-51.35	4317130	3.33941	2.80484	0.00389786	0.00389786	5.76043	5.86355	0.0901017	5	3.42882	3.31688	3.61838	3.5453	4.00022	4.13214	3.73617	3.83239	3.73392	3.16471	4.10844	3.96844	3.95802	3.82892	4.12324	4.28149	2.30414	2.41796	3.04496	2.46442	1.75901	2.21866	2.31026	1.83869	1.9677	1.45334	1.43074	1.35262	1.45477	1.2898	1.11726	1.13798	1.19847	1.0013	1.12414	1.28276	0.982222	1.55133	1.56265
simsample318	-52.25	4807340	3.34892	2.76752	0.00400665	0.00400665	5.76967	5.48763	0.117856	5	3.17688	3.01612	3.36306	3.32318	3.67844	3.90641	3.44168	3.54811	3.47963	2.88241	3.77811	3.72014	3.65635	3.59664	3.80676	4.0376	2.24953	2.3959	2.98339	2.43949	1.72059	2.17075	2.28058	1.82381	1.94693	1.43864	1.42989	1.34531	1.44741	1.27626	1.10349	1.1185	1.17787	0.98092	1.09917	1.26287	0.958453	1.50631	1.52722
simsample319	-56.4	4157470	3.30297	2.82857	0.00394785	0.00394785	6.01964	5.74186	0.0993732	5	3.33369	3.20658	3.52554	3.47533	3.9008	4.05835	3.63578	3.73175	3.64063	3.06294	3.9824	3.87143	3.83469	3.72878	3.99551	4.17642	2.28662	2.41137	3.01706	2.45659	1.74715	2.20063	2.29927	1.83773	1.96725	1.45504	1.43579	1.35429	1.45505	1.28822	1.11894	1.13801	1.19674	1.00386	1.12501	1.29	0.985121	1.55094	1.56723
simsample320	-51.95	4863160	3.35671	2.76856	0.00400665	0.00400665	5.85129	5.48339	0.113105	5	3.22298	3.07462	3.42175	3.37473	3.74572	3.9532	3.49648	3.5998	3.52847	2.93554	3.84589	3.77463	3.72139	3.64621	3.86754	4.08388	2.2606	2.40123	3.00188	2.44632	1.72973	2.18025	2.28513	1.82571	1.95106	1.43876	1.42667	1.34314	1.44708	1.27713	1.10609	1.1213	1.18042	0.984197	1.10331	1.26495	0.959429	1.51131	1.5292
simsample321	-52.85	4416280	3.35968	2.8061	0.00393909	0.00393909	5.79096	6.11883	0.106089	5	3.34449	3.19898	3.53807	3.48302	3.88379	4.07733	3.62918	3.74157	3.65916	3.05818	3.99615	3.90146	3.85893	3.76936	4.02148	4.22783	2.31861	2.45253	3.07247	2.50083	1.7745	2.23407	2.33449	1.86099	1.98755	1.4689	1.4559	1.37346	1.47889	1.30524	1.13041	1.14808	1.20795	1.00807	1.13084	1.29477	0.985031	1.55184	1.57046
simsample322	-51.95	5638010	3.42324	2.49136	0.00397219	0.00397219	5.88722	5.62005	0.109308	5	3.34506	3.1975	3.54438	3.47161	3.87502	4.08199	3.6323	3.74915	3.66775	3.05492	4.03381	3.92728	3.88319	3.78955	4.05047	4.26154	2.2983	2.43668	3.07351	2.48805	1.74879	2.21988	2.32629	1.83711	1.96765	1.44267	1.43092	1.34777	1.4489	1.27681	1.10067	1.11885	1.17878	0.979503	1.10025	1.26268	0.953237	1.5155	1.5288
simsample323	-51.1	4410330	3.33306	2.74301	0.00390276	0.00390276	5.88053	5.83997	0.0977596	5	3.41156	3.28423	3.60903	3.5451	3.98118	4.14299	3.712	3.81805	3.7258	3.13924	4.09037	3.97022	3.94466	3.82962	4.10776	4.29215	2.32696	2.45031	3.07855	2.49702	1.77595	2.23853	2.33889	1.86359	1.99411	1.47179	1.45199	1.37149	1.47508	1.30441	1.13228	1.15098	1.21017	1.01075	1.1316	1.298	0.991293	1.56283	1.57807
simsample324	-51.55	5030560	3.39352	2.61985	0.0038684	0.0038684	6.14292	5.80432	0.0894816	5	3.54695	3.43311	3.7481	3.65562	4.13334	4.26403	3.86433	3.97416	3.87003	3.2779	4.28891	4.1245	4.11754	3.97091	4.28755	4.44166	2.35535	2.47285	3.1362	2.53103	1.79796	2.27841	2.36979	1.87022	2.00506	1.47004	1.44979	1.36991	1.47427	1.30487	1.12935	1.15157	1.21376	1.01057	1.13559	1.29429	0.986407	1.56848	1.57823
simsample325	-52	5063500	3.39846	2.59824	0.0038596	0.0038596	6.25913	5.95776	0.0980507	5	3.51385	3.38097	3.71813	3.63523	4.08586	4.25969	3.82518	3.93748	3.84228	3.23156	4.23882	4.10297	4.07809	3.95378	4.25592	4.44165	2.37842	2.50691	3.16233	2.55875	1.81145	2.29479	2.3973	1.89531	2.03031	1.49062	1.47122	1.38895	1.49575	1.32315	1.14207	1.16191	1.22315	1.01906	1.1438	1.3075	0.99265	1.57457	1.58625
simsample326	-51.6	4558040	3.34722	2.74549	0.00393107	0.00393107	5.79165	5.82452	0.10627	5	3.33346	3.19295	3.5293	3.47211	3.87183	4.06139	3.61851	3.7253	3.64636	3.04958	3.99005	3.89628	3.84969	3.75585	4.00631	4.21365	2.30906	2.44641	3.06037	2.48995	1.76246	2.22353	2.32751	1.856	1.98484	1.46459	1.44944	1.36576	1.46984	1.29881	1.12509	1.14049	1.20142	1.00277	1.12528	1.29106	0.981172	1.5491	1.56634
simsample327	-47.3	4344220	3.34752	2.80452	0.00387445	0.00387445	5.631	5.98686	0.0826899	5	3.5663	3.46736	3.75925	3.67242	4.17035	4.27799	3.89383	3.98977	3.87846	3.31118	4.29694	4.12054	4.11718	3.9675	4.29493	4.43078	2.36136	2.46797	3.12202	2.52148	1.80516	2.27727	2.36559	1.87843	2.00648	1.48036	1.4556	1.3775	1.4792	1.31376	1.14062	1.16391	1.22354	1.02203	1.14642	1.30726	1.00517	1.58766	1.59929
simsample328	-49.45	5328370	3.42674	2.71101	0.0039193	0.0039193	6.05665	5.80234	0.0959577	5	3.4969	3.37031	3.69663	3.60691	4.0534	4.21622	3.80071	3.91293	3.8164	3.22066	4.20945	4.07099	4.05152	3.93083	4.2271	4.40486	2.36443	2.48417	3.14085	2.53936	1.80146	2.27962	2.37332	1.87592	2.00526	1.47351	1.45356	1.3735	1.47716	1.30658	1.1289	1.14888	1.21044	1.0077	1.12963	1.29116	0.98074	1.5507	1.55964
simsample329	-52.6	4773150	3.35398	2.81738	0.00403247	0.00403247	5.7978	5.56239	0.118516	5	3.17808	3.01577	3.37086	3.33247	3.68403	3.90709	3.44348	3.55463	3.49265	2.89358	3.79064	3.73209	3.66373	3.60257	3.80382	4.03228	2.25349	2.39882	2.98147	2.43781	1.72337	2.17201	2.28556	1.82818	1.95252	1.44427	1.43117	1.34564	1.44793	1.27712	1.1045	1.12036	1.18225	0.986634	1.10435	1.26901	0.961009	1.50802	1.52751
simsample330	-48.55	4432630	3.33177	2.63527	0.00388998	0.00388998	5.64274	5.92449	0.0970073	5	3.45468	3.32564	3.65014	3.57824	4.02708	4.18564	3.75808	3.86627	3.77081	3.17347	4.14526	4.01316	3.98349	3.86711	4.15461	4.3392	2.34167	2.46346	3.10835	2.51263	1.78544	2.2594	2.36086	1.87469	2.00855	1.48024	1.4591	1.37823	1.48089	1.31247	1.138	1.15973	1.22087	1.01815	1.14483	1.30915	0.995488	1.57763	1.59251
simsample331	-49	4370140	3.35028	2.77151	0.00387021	0.00387021	5.65298	5.9726	0.084657	5	3.52668	3.42381	3.7202	3.63557	4.12473	4.23215	3.84461	3.94438	3.8397	3.27147	4.24262	4.07763	4.07633	3.9258	4.24354	4.38498	2.3387	2.44656	3.09418	2.49788	1.78725	2.26099	2.35182	1.86549	1.99644	1.47153	1.44712	1.37169	1.47369	1.30685	1.13349	1.15778	1.21766	1.01512	1.13823	1.30095	0.995103	1.5714	1.5827
simsample332	-47.55	4425930	3.33199	2.6434	0.00388998	0.00388998	5.62356	5.91713	0.0921836	5	3.5053	3.38496	3.698	3.61998	4.08875	4.22383	3.81295	3.91783	3.81452	3.22407	4.21383	4.06182	4.04534	3.91884	4.22249	4.39112	2.35029	2.46992	3.11369	2.51945	1.79536	2.27187	2.36553	1.87856	2.01062	1.48222	1.46211	1.38324	1.48647	1.31764	1.13955	1.16224	1.22214	1.02111	1.14486	1.3078	1.00011	1.58353	1.59444
simsample333	-52.1	4367430	3.33974	2.72266	0.00392706	0.00392706	5.76066	6.00627	0.102423	5	3.37308	3.2384	3.57291	3.5108	3.93089	4.10132	3.66489	3.77025	3.68381	3.08857	4.03226	3.92701	3.89266	3.79393	4.05861	4.24795	2.31809	2.4469	3.072	2.49036	1.76793	2.22982	2.33232	1.85754	1.98589	1.46417	1.44716	1.36454	1.4686	1.3	1.12455	1.14399	1.20528	1.00641	1.13011	1.29296	0.985565	1.55641	1.57632
simsample334	-56.2	4482880	3.33655	2.64949	0.0039914	0.0039914	5.71151	5.85647	0.113589	5	3.2374	3.08222	3.42915	3.38446	3.76495	3.97887	3.51942	3.6267	3.55048	2.94991	3.87497	3.79628	3.7388	3.66259	3.89002	4.10782	2.26602	2.41072	3.01365	2.45562	1.73277	2.18772	2.29785	1.83177	1.95844	1.44279	1.42952	1.34483	1.44924	1.27911	1.10637	1.12273	1.18399	0.986734	1.1062	1.27159	0.965763	1.52399	1.5441
simsample335	-47.15	4975260	3.38486	2.62328	0.0038431	0.0038431	5.98734	5.8411	0.0880263	5	3.60305	3.49204	3.80036	3.70477	4.19504	4.32288	3.91599	4.02474	3.9218	3.33193	4.34761	4.17834	4.17546	4.02706	4.35295	4.51281	2.39188	2.50543	3.17819	2.56319	1.82336	2.30712	2.40177	1.8995	2.03389	1.49763	1.47362	1.39401	1.49834	1.3278	1.14807	1.16864	1.22682	1.02387	1.14931	1.31322	1.00132	1.59083	1.60124
simsample336	-56.15	4512010	3.35365	2.76068	0.00398532	0.00398532	5.76542	6.02784	0.121769	5	3.20084	3.03108	3.39422	3.35766	3.71255	3.94609	3.46603	3.57736	3.51279	2.89643	3.80429	3.75822	3.68722	3.63346	3.83849	4.08318	2.28713	2.44044	3.03465	2.48054	1.74497	2.19965	2.31615	1.85288	1.97992	1.46378	1.45331	1.36652	1.47379	1.29992	1.1251	1.13951	1.1988	0.999826	1.11906	1.28702	0.973852	1.52878	1.55077
simsample337	-52.45	4770620	3.34733	2.76375	0.00401374	0.00401374	5.74957	5.49515	0.117026	5	3.17376	3.0189	3.368	3.32505	3.68318	3.90051	3.4392	3.54524	3.47703	2.87896	3.77372	3.71253	3.65171	3.58874	3.80024	4.0261	2.24287	2.39044	2.97785	2.43279	1.71567	2.16224	2.27363	1.81767	1.94205	1.43461	1.42265	1.33711	1.44046	1.27256	1.09917	1.1151	1.17365	0.979562	1.09741	1.2616	0.956995	1.50725	1.53042
simsample338	-53.6	4752530	3.35203	2.81678	0.00402651	0.00402651	5.82036	5.51711	0.118119	5	3.15351	2.99466	3.34563	3.30794	3.66182	3.88347	3.42081	3.52668	3.45941	2.86531	3.75346	3.70716	3.64164	3.57712	3.78337	4.00877	2.24025	2.38195	2.9654	2.42202	1.71044	2.15091	2.26466	1.81023	1.93349	1.42859	1.41629	1.33276	1.43523	1.26792	1.09732	1.11169	1.17151	0.978739	1.09506	1.26095	0.956854	1.50225	1.52143
simsample339	-57.35	4864200	3.361	2.82064	0.00403627	0.00403627	5.92166	5.52047	0.123798	5	3.11634	2.94712	3.30692	3.27583	3.60633	3.84853	3.37447	3.4816	3.42661	2.82141	3.70376	3.66457	3.5944	3.54791	3.73858	3.98082	2.2376	2.39212	2.96655	2.4302	1.71375	2.15761	2.26953	1.81853	1.94063	1.43663	1.42485	1.3373	1.4422	1.26983	1.09628	1.11091	1.17066	0.976878	1.09448	1.25895	0.951907	1.49317	1.51596
simsample340	-50.8	4358600	3.33514	2.74264	0.00391017	0.00391017	5.84044	5.89881	0.0938332	5	3.44026	3.31745	3.63381	3.56167	4.01525	4.16101	3.74963	3.85621	3.75603	3.17196	4.13459	4.00016	3.97929	3.85642	4.1411	4.31045	2.32589	2.44319	3.08064	2.4939	1.77914	2.24816	2.34487	1.86496	1.99789	1.473	1.45198	1.37102	1.47266	1.30316	1.12923	1.15176	1.21139	1.01145	1.13566	1.29775	0.990924	1.56382	1.57732
simsample341	-51.45	4895100	3.39373	2.78405	0.00394941	0.00394941	5.88531	5.91309	0.108518	5	3.33988	3.19718	3.54213	3.4802	3.87484	4.07357	3.61899	3.73288	3.65791	3.05376	3.99594	3.90681	3.86038	3.77139	4.01918	4.23318	2.32387	2.46146	3.08344	2.50816	1.77352	2.24459	2.3455	1.86222	1.98992	1.46615	1.45338	1.37066	1.47638	1.30342	1.12602	1.14222	1.20235	1.00118	1.12139	1.28475	0.973973	1.5348	1.54978
simsample342	-57.6	5406660	3.40065	2.60524	0.00401487	0.00401487	6.1643	5.69537	0.131471	5	3.16057	2.97713	3.36106	3.32181	3.64479	3.92154	3.41385	3.53201	3.47972	2.84454	3.76563	3.74205	3.65772	3.61948	3.81128	4.08093	2.28686	2.45406	3.05095	2.49541	1.74612	2.20615	2.32935	1.85328	1.9804	1.45879	1.45333	1.3634	1.46937	1.29025	1.1132	1.12336	1.18664	0.987643	1.10928	1.27915	0.959417	1.51201	1.53315
simsample343	-52.3	4949280	3.40672	2.76798	0.00393502	0.00393502	5.92528	5.85752	0.0949426	5	3.42978	3.30899	3.62081	3.5406	3.98219	4.13769	3.72807	3.83315	3.74035	3.15646	4.11727	3.98124	3.96197	3.84473	4.1334	4.30707	2.31555	2.43162	3.06974	2.48543	1.76641	2.23132	2.32671	1.84025	1.96716	1.45106	1.43297	1.35301	1.45357	1.28562	1.11162	1.13114	1.18985	0.992167	1.11176	1.26911	0.96667	1.52689	1.53857
simsample344	-52	4425790	3.3413	2.70781	0.00388719	0.00388719	5.92768	5.92883	0.093511	5	3.46635	3.34934	3.66617	3.59166	4.0444	4.18502	3.77243	3.87918	3.78391	3.19514	4.16431	4.02638	4.00593	3.88302	4.17214	4.34021	2.33758	2.45948	3.10011	2.50836	1.78656	2.25273	2.34801	1.86671	1.99699	1.47138	1.45052	1.37091	1.47551	1.30767	1.13581	1.15661	1.21785	1.01689	1.13965	1.30371	0.995463	1.57225	1.58526
simsample345	-54.05	4280380	3.31557	2.81018	0.00395162	0.00395162	5.99841	5.94714	0.121002	5	3.2237	3.05184	3.41902	3.39478	3.74939	3.98311	3.49621	3.60656	3.54176	2.92667	3.83178	3.78795	3.7175	3.65986	3.85937	4.09946	2.30294	2.45891	3.05361	2.49499	1.7607	2.21329	2.32774	1.86834	1.99787	1.4794	1.46825	1.38088	1.48719	1.31153	1.13621	1.14926	1.21108	1.01178	1.13185	1.30386	0.989496	1.5515	1.57575
simsample346	-50.55	4413520	3.33902	2.70637	0.00388312	0.00388312	5.9912	5.99758	0.0940535	5	3.50296	3.37785	3.70189	3.621	4.08233	4.2327	3.81169	3.91795	3.81776	3.2243	4.20355	4.06466	4.04484	3.91892	4.21247	4.38661	2.36441	2.4885	3.13567	2.53761	1.80791	2.28295	2.38171	1.89445	2.02514	1.49331	1.47267	1.39005	1.49523	1.32119	1.14552	1.16664	1.22841	1.02602	1.15256	1.31712	1.00614	1.59347	1.6033
simsample347	-54.1	4426820	3.33827	2.65771	0.00394847	0.00394847	5.79639	5.96764	0.106095	5	3.33817	3.19801	3.53805	3.47779	3.88767	4.07141	3.62293	3.73486	3.65246	3.05472	3.99758	3.89984	3.85176	3.76197	4.01762	4.21964	2.30371	2.43708	3.05493	2.48429	1.75884	2.22373	2.33021	1.85884	1.98871	1.46421	1.44822	1.36624	1.4712	1.29904	1.124	1.14126	1.20101	1.00178	1.12579	1.29083	0.980106	1.54755	1.56586
simsample348	-56.05	4756940	3.35866	2.84162	0.00404514	0.00404514	5.81434	5.66599	0.128875	5	3.09011	2.9128	3.28231	3.25945	3.5775	3.83614	3.34655	3.4564	3.40268	2.79392	3.67081	3.64736	3.56305	3.53146	3.70966	3.96224	2.24268	2.40433	2.97141	2.43922	1.71802	2.16066	2.27993	1.82354	1.948	1.44274	1.4335	1.34599	1.44889	1.27943	1.10832	1.1184	1.17986	0.983471	1.10103	1.26651	0.956656	1.50054	1.52143
simsample349	-43.6	4594040	3.35731	2.74804	0.0038218	0.0038218	5.67106	5.90253	0.0811148	5	3.65746	3.56318	3.85555	3.76024	4.27256	4.371	3.98064	4.08477	3.9749	3.40035	4.41446	4.23136	4.2293	4.06809	4.41011	4.55284	2.41242	2.51719	3.18611	2.57025	1.83887	2.32357	2.41136	1.91045	2.04568	1.50695	1.48264	1.40295	1.50754	1.33778	1.15844	1.18354	1.2423	1.03816	1.16418	1.32951	1.02001	1.61385	1.62293
simsample350	-49.85	4326130	3.30227	2.68236	0.00394142	0.00394142	5.57996	5.70982	0.107762	5	3.30525	3.15708	3.50104	3.45127	3.85148	4.04347	3.59303	3.69792	3.61742	3.01634	3.9493	3.85843	3.80696	3.71428	3.95848	4.16511	2.28864	2.42599	3.03527	2.46693	1.74873	2.20467	2.31354	1.84796	1.98024	1.46279	1.44538	1.36132	1.46641	1.29724	1.12383	1.14216	1.20197	1.00439	1.12527	1.29532	0.985124	1.55371	1.57409
simsample351	-52.8	4401060	3.33969	2.7495	0.00391017	0.00391017	5.84451	5.89574	0.0931057	5	3.45696	3.33624	3.6512	3.57686	4.02886	4.17222	3.75997	3.86063	3.76817	3.18472	4.14778	4.0072	3.98571	3.86554	4.15504	4.32077	2.33161	2.45442	3.08852	2.50167	1.78249	2.24924	2.34245	1.86388	1.99476	1.46962	1.44793	1.36755	1.47361	1.30585	1.13239	1.15292	1.21403	1.01162	1.13424	1.29833	0.992306	1.56949	1.58358
simsample352	-54.95	4193740	3.31886	2.79013	0.00391545	0.00391545	6.01263	5.9717	0.0996186	5	3.39098	3.26078	3.587	3.5297	3.96269	4.12292	3.69089	3.79631	3.70045	3.11344	4.05752	3.94121	3.91149	3.80648	4.06968	4.25287	2.31812	2.44775	3.07359	2.49897	1.77733	2.24077	2.34248	1.86815	1.9966	1.47428	1.45435	1.37282	1.47594	1.30633	1.13433	1.15449	1.21566	1.01543	1.13757	1.3038	0.996645	1.56905	1.5858
simsample353	-51.2	4397080	3.32744	2.76398	0.00391036	0.00391036	5.96187	5.83923	0.0990983	5	3.42438	3.29554	3.62407	3.5629	3.99768	4.1608	3.72812	3.83009	3.74292	3.14937	4.10415	3.98591	3.95595	3.85118	4.12047	4.30093	2.3366	2.46209	3.08885	2.5068	1.78647	2.25589	2.35701	1.87928	2.01019	1.48551	1.46343	1.37978	1.4835	1.31588	1.14183	1.16068	1.22132	1.02086	1.14607	1.31144	0.999743	1.57788	1.59639
simsample354	-53.55	4854940	3.40016	2.91125	0.00401591	0.00401591	5.72758	5.8263	0.1109	5	3.23992	3.09304	3.42778	3.37704	3.74526	3.95574	3.51081	3.62254	3.54818	2.95702	3.85736	3.78596	3.7297	3.65717	3.88966	4.10297	2.27092	2.40673	3.00734	2.45331	1.73467	2.18636	2.28545	1.82238	1.94507	1.43665	1.42408	1.34214	1.44356	1.2745	1.10218	1.11676	1.17705	0.981226	1.09737	1.25695	0.954118	1.4986	1.51417
simsample355	-52.1	4744410	3.37986	2.81512	0.0039701	0.0039701	5.77284	5.752	0.0998692	5	3.33891	3.20628	3.52509	3.45706	3.87278	4.04327	3.62719	3.73676	3.64846	3.07267	4.00288	3.89062	3.86031	3.7548	4.0222	4.20593	2.28592	2.4079	3.02082	2.44901	1.74044	2.197	2.29521	1.82392	1.95186	1.43941	1.42135	1.33981	1.43978	1.27532	1.10472	1.12442	1.18332	0.988004	1.10772	1.26678	0.966572	1.52242	1.53576
simsample356	-50	4356090	3.33386	2.79486	0.00389786	0.00389786	5.78316	5.83857	0.091819	5	3.45276	3.33909	3.64759	3.57299	4.0273	4.16422	3.75745	3.86147	3.76455	3.19156	4.14757	4.00788	3.99189	3.85906	4.1496	4.31684	2.32775	2.44142	3.07243	2.48921	1.77553	2.2404	2.33628	1.86319	1.99121	1.4691	1.45071	1.36815	1.47087	1.30431	1.13258	1.15357	1.21354	1.01272	1.13661	1.29981	0.992996	1.56692	1.58013
simsample357	-60.9	5470930	3.41636	2.4977	0.0040362	0.0040362	6.04694	5.77314	0.127866	5	3.15117	2.97491	3.34923	3.30401	3.63867	3.90284	3.41042	3.5307	3.46954	2.83937	3.76946	3.72543	3.6446	3.59997	3.80263	4.05425	2.24786	2.41034	3.01382	2.45866	1.7184	2.178	2.2962	1.82316	1.95141	1.43285	1.42555	1.33999	1.44386	1.26812	1.09143	1.10253	1.16306	0.965376	1.08352	1.24968	0.937344	1.4841	1.50329
simsample358	-55.15	4360640	3.33365	2.81963	0.00396448	0.00396448	5.92375	5.92651	0.115709	5	3.23638	3.07929	3.43118	3.39733	3.76428	3.98659	3.51621	3.61913	3.55037	2.94343	3.84569	3.78654	3.725	3.66267	3.88007	4.10889	2.28937	2.43435	3.02961	2.47603	1.75072	2.20361	2.31564	1.85069	1.97747	1.46545	1.45225	1.36651	1.47085	1.29828	1.12493	1.14143	1.20188	1.00562	1.12605	1.2957	0.983006	1.54046	1.56221
simsample359	-48.95	4461360	3.38407	2.75258	0.00384948	0.00384948	5.73587	6.26888	0.0767953	5	3.66425	3.58055	3.86714	3.76165	4.28775	4.37531	4.00715	4.10632	3.99051	3.42123	4.4367	4.23832	4.24802	4.07298	4.42896	4.55615	2.39789	2.49663	3.16959	2.54953	1.82697	2.3103	2.39231	1.89046	2.02102	1.48743	1.46131	1.3842	1.4855	1.31745	1.1416	1.16657	1.22557	1.02278	1.14946	1.30654	1.00142	1.58691	1.59384
simsample360	-53.5	4771900	3.34629	2.74513	0.00400665	0.00400665	5.78735	5.47555	0.11537	5	3.18151	3.02942	3.37532	3.33153	3.69355	3.90712	3.44615	3.55683	3.48639	2.89525	3.79602	3.72809	3.66655	3.59913	3.81601	4.03866	2.24039	2.38072	2.97081	2.42414	1.71002	2.15645	2.27033	1.81178	1.93837	1.43108	1.4181	1.33485	1.43806	1.26925	1.09679	1.11162	1.17254	0.979732	1.09663	1.25984	0.954898	1.50286	1.52186
simsample361	-54.8	4838130	3.36041	2.80014	0.00403627	0.00403627	5.86221	5.49251	0.115395	5	3.17544	3.02224	3.36882	3.32458	3.68443	3.8984	3.44497	3.55195	3.4826	2.89311	3.78992	3.72723	3.66681	3.59836	3.81934	4.04122	2.24378	2.38773	2.97293	2.42621	1.71349	2.16064	2.26995	1.81011	1.93099	1.42842	1.41739	1.33355	1.43496	1.26637	1.09564	1.11138	1.17072	0.976569	1.09538	1.25659	0.955733	1.49982	1.51995
simsample362	-52.3	4478390	3.33887	2.70753	0.00392607	0.00392607	5.87767	5.94086	0.11031	5	3.32695	3.17618	3.52262	3.47323	3.87092	4.07557	3.6137	3.72736	3.65021	3.03866	3.97441	3.88809	3.83444	3.75095	3.99331	4.20802	2.31624	2.45916	3.07015	2.49798	1.76955	2.23175	2.34512	1.86858	1.99589	1.47143	1.45813	1.37449	1.48092	1.30757	1.1315	1.14531	1.2077	1.00857	1.12943	1.29677	0.985415	1.55423	1.5721
simsample363	-48.9	4343160	3.34124	2.8144	0.00389185	0.00389185	5.63922	5.85097	0.0855227	5	3.48992	3.38392	3.67747	3.59445	4.07179	4.1884	3.79783	3.90172	3.7998	3.23806	4.19634	4.03564	4.03392	3.88822	4.20142	4.34878	2.32984	2.43398	3.07478	2.48188	1.77492	2.23904	2.3317	1.85324	1.98081	1.46003	1.43816	1.36074	1.46111	1.29855	1.12471	1.14657	1.20701	1.00821	1.1299	1.28912	0.989531	1.56416	1.57412
simsample364	-47	4479510	3.36029	2.79928	0.00385597	0.00385597	5.67684	5.97831	0.0815766	5	3.60728	3.50724	3.7967	3.70091	4.20906	4.31304	3.93619	4.04117	3.92835	3.35403	4.3494	4.17104	4.17629	4.02267	4.3527	4.49164	2.38672	2.48894	3.14755	2.54205	1.81686	2.29552	2.38208	1.88948	2.02222	1.49006	1.46349	1.38355	1.48833	1.32144	1.14552	1.17057	1.2294	1.02695	1.15382	1.31523	1.00942	1.59385	1.60341
simsample365	-52.3	4227400	3.31512	2.79701	0.00390596	0.00390596	6.02149	5.76242	0.0864192	5	3.47506	3.36659	3.661	3.58294	4.06355	4.17334	3.78586	3.88181	3.77787	3.20938	4.16342	4.00789	4.00231	3.86263	4.16946	4.3189	2.31793	2.43107	3.06439	2.47724	1.77205	2.23853	2.32824	1.85289	1.98043	1.46178	1.44099	1.36292	1.46403	1.29789	1.12816	1.15024	1.20897	1.01141	1.13303	1.29531	0.993382	1.57016	1.58124
simsample366	-56.8	4446300	3.37096	2.79728	0.00390179	0.00390179	6.00632	6.13028	0.0965888	5	3.41977	3.29316	3.61107	3.54022	3.97764	4.13002	3.71476	3.81907	3.72981	3.14611	4.10237	3.97723	3.95093	3.83874	4.1175	4.29685	2.32732	2.45018	3.08005	2.49778	1.77601	2.2464	2.34506	1.86245	1.98746	1.46426	1.44381	1.36436	1.46827	1.30164	1.12688	1.14481	1.20366	1.00471	1.12801	1.28936	0.983589	1.5509	1.56165
simsample367	-51.4	4427100	3.33661	2.75587	0.00389997	0.00389997	5.96594	5.79255	0.0913029	5	3.45796	3.34465	3.6521	3.57715	4.04213	4.17448	3.76666	3.86734	3.77093	3.1935	4.15184	4.0028	3.98635	3.85787	4.15762	4.32626	2.32868	2.44379	3.07976	2.49485	1.78041	2.24304	2.33957	1.85898	1.98815	1.46547	1.4449	1.36653	1.46992	1.301	1.12782	1.15056	1.21029	1.01125	1.13158	1.29535	0.991912	1.57112	1.58035
simsample368	-53.55	4602330	3.3739	2.78953	0.00395106	0.00395106	5.82302	6.01023	0.105719	5	3.33954	3.19805	3.52927	3.46889	3.87314	4.06702	3.62165	3.72963	3.64931	3.0523	3.98965	3.89657	3.85626	3.7619	4.01661	4.21622	2.31142	2.44176	3.05807	2.48837	1.76528	2.22735	2.33234	1.85713	1.98394	1.46497	1.44721	1.36117	1.46559	1.2971	1.12223	1.1393	1.20129	1.0004	1.12229	1.28491	0.977833	1.53676	1.55305
simsample369	-49.75	4342380	3.32805	2.79764	0.00389786	0.00389786	5.78393	5.83231	0.0963856	5	3.41796	3.29386	3.61043	3.54189	3.97831	4.12999	3.70992	3.81396	3.72096	3.13926	4.08878	3.97146	3.94153	3.82687	4.10115	4.28001	2.32636	2.44973	3.07366	2.49289	1.77805	2.24113	2.33951	1.86707	1.99481	1.47325	1.45413	1.37372	1.47616	1.30501	1.13071	1.15238	1.21184	1.01112	1.13387	1.29899	0.992572	1.566	1.58245
simsample370	-52.7	4391980	3.34022	2.69523	0.00388312	0.00388312	5.96203	5.93819	0.0913968	5	3.47234	3.35892	3.66481	3.5891	4.05104	4.1843	3.7783	3.88179	3.78458	3.20284	4.16946	4.02265	4.00791	3.87041	4.17538	4.33884	2.32599	2.44594	3.08606	2.49594	1.77954	2.24969	2.34479	1.86077	1.99218	1.46578	1.44565	1.36281	1.46821	1.30314	1.12982	1.15315	1.21341	1.01305	1.13721	1.29934	0.990641	1.56966	1.58303
simsample371	-57.85	5261570	3.42425	2.68389	0.00395988	0.00395988	6.08834	5.78889	0.105331	5	3.33243	3.18919	3.52402	3.45356	3.85448	4.05237	3.6151	3.72572	3.64975	3.04978	4.00085	3.90015	3.8615	3.7625	4.02403	4.22217	2.2877	2.41856	3.04556	2.46966	1.74239	2.20451	2.30804	1.82769	1.95638	1.44106	1.42448	1.34185	1.44408	1.27413	1.09743	1.11624	1.17604	0.980566	1.09796	1.25582	0.951781	1.50476	1.5194
simsample372	-61.65	5382910	3.42202	2.48788	0.00403049	0.00403049	5.95235	5.95232	0.12823	5	3.15508	2.97768	3.35474	3.31181	3.64448	3.91333	3.41686	3.53607	3.47993	2.84669	3.78168	3.73902	3.65799	3.60839	3.80934	4.07353	2.25216	2.41161	3.01693	2.46148	1.71635	2.17459	2.29349	1.81689	1.94614	1.43158	1.42432	1.33784	1.44186	1.26679	1.08893	1.10076	1.16284	0.965734	1.08457	1.25082	0.93702	1.48369	1.50602
simsample373	-53.2	4839510	3.38324	2.79025	0.00395354	0.00395354	6.08624	5.87226	0.109966	5	3.32463	3.17296	3.52493	3.47177	3.86009	4.06876	3.60779	3.71874	3.63937	3.03588	3.97577	3.89305	3.84056	3.7592	3.99945	4.20911	2.31663	2.45321	3.06906	2.49954	1.76996	2.23296	2.34111	1.85921	1.99	1.46986	1.45372	1.37018	1.47312	1.30098	1.12421	1.1419	1.20404	1.00376	1.12443	1.29249	0.981936	1.54543	1.56301
simsample374	-57.95	5256920	3.41627	2.71596	0.00398115	0.00398115	6.15353	5.79437	0.117298	5	3.24483	3.08613	3.44269	3.39499	3.75739	3.99155	3.52783	3.63613	3.5685	2.95823	3.88946	3.8247	3.76422	3.69851	3.92289	4.14723	2.29351	2.44062	3.04588	2.48427	1.74738	2.20479	2.31356	1.83855	1.96318	1.44804	1.43743	1.3531	1.45661	1.28334	1.10709	1.12212	1.18369	0.984003	1.10373	1.26991	0.958552	1.51119	1.52755
simsample375	-52.85	4578900	3.36837	2.7625	0.003918	0.003918	5.8924	5.97384	0.0981531	5	3.41576	3.285	3.60823	3.53495	3.97255	4.13865	3.71114	3.81595	3.72905	3.13632	4.09147	3.96893	3.94378	3.83315	4.10982	4.28924	2.32254	2.44801	3.08178	2.50025	1.77564	2.24097	2.3419	1.85984	1.99068	1.46727	1.4476	1.3663	1.46757	1.29984	1.12479	1.14477	1.20276	1.00414	1.12803	1.28973	0.983746	1.5539	1.56991
simsample376	-49.85	5112430	3.42184	2.62831	0.00387512	0.00387512	5.9454	5.93644	0.0799431	5	3.63752	3.54155	3.83052	3.7159	4.2331	4.33588	3.96239	4.07176	3.95809	3.37943	4.40552	4.20646	4.22096	4.04759	4.40248	4.53481	2.37138	2.47607	3.15552	2.53624	1.80699	2.28919	2.37292	1.87051	2.00119	1.4678	1.44217	1.36469	1.46723	1.29842	1.12213	1.14599	1.2064	1.00507	1.1297	1.28555	0.980798	1.56095	1.56901
simsample377	-51.45	4262790	3.30311	2.79774	0.00392328	0.00392328	6.03602	5.73635	0.102369	5	3.36886	3.23478	3.56143	3.50951	3.92754	4.09767	3.65594	3.75758	3.67112	3.08448	4.02053	3.91928	3.88098	3.78444	4.03944	4.22926	2.32392	2.45538	3.07707	2.50293	1.77899	2.24321	2.3443	1.87358	2.00496	1.48199	1.46442	1.38014	1.48261	1.31517	1.14014	1.15714	1.21887	1.01857	1.14028	1.30927	0.999012	1.57257	1.59037
simsample378	-57.8	4365820	3.3391	2.81944	0.00396448	0.00396448	5.93658	5.92217	0.114682	5	3.21947	3.06635	3.41055	3.37513	3.74767	3.95841	3.49774	3.60366	3.53495	2.93637	3.8407	3.77211	3.71308	3.64447	3.86102	4.08043	2.26814	2.41305	3.01058	2.46282	1.7453	2.19587	2.30151	1.83917	1.96625	1.45297	1.43974	1.35455	1.45838	1.2881	1.11501	1.13042	1.19276	0.995991	1.11318	1.28009	0.971833	1.52661	1.54574
simsample379	-50.05	4633070	3.36646	2.77289	0.00391638	0.00391638	5.88854	5.94021	0.0958837	5	3.47955	3.35211	3.67537	3.59555	4.04245	4.19776	3.77597	3.88572	3.79388	3.19857	4.17153	4.04136	4.0156	3.89758	4.18592	4.36706	2.35778	2.48068	3.12396	2.53373	1.80074	2.27644	2.37279	1.88492	2.01357	1.48514	1.46454	1.38309	1.48789	1.31681	1.14026	1.16106	1.22307	1.02037	1.14281	1.30697	0.996854	1.57381	1.58544
simsample380	-53.05	4815650	3.34875	2.75342	0.00400665	0.00400665	5.76297	5.4735	0.119076	5	3.15663	2.99871	3.34841	3.31263	3.66879	3.89597	3.42947	3.53838	3.46665	2.86556	3.76108	3.70415	3.63949	3.57793	3.78454	4.01629	2.23679	2.38541	2.9716	2.42853	1.71544	2.16184	2.27245	1.81449	1.93714	1.43094	1.41837	1.33359	1.43882	1.26983	1.09915	1.11229	1.17075	0.977117	1.09641	1.25857	0.952382	1.49593	1.51903
simsample381	-56.5	4387610	3.33162	2.81208	0.00396448	0.00396448	5.97191	5.87921	0.117423	5	3.2196	3.06174	3.41776	3.38389	3.74643	3.96786	3.49691	3.60357	3.53487	2.92949	3.83276	3.77623	3.71293	3.64644	3.8579	4.08841	2.28265	2.42841	3.0232	2.47351	1.74768	2.2012	2.31462	1.85481	1.97799	1.46375	1.45208	1.36417	1.47078	1.29881	1.12486	1.14039	1.20326	1.00369	1.12368	1.29178	0.980005	1.53946	1.56028
simsample382	-53.2	4949640	3.39843	2.83138	0.0039877	0.0039877	5.82649	5.69858	0.103303	5	3.30569	3.16529	3.48947	3.42737	3.82848	4.00752	3.58523	3.69123	3.61328	3.02995	3.95773	3.85634	3.82549	3.72738	3.98455	4.17969	2.27888	2.40539	3.01817	2.45397	1.74041	2.19387	2.29149	1.81928	1.94442	1.43539	1.41703	1.33648	1.43917	1.27407	1.10039	1.11794	1.17688	0.982556	1.09987	1.25852	0.958166	1.50938	1.52515
simsample383	-55.85	5260760	3.41244	2.67459	0.00398355	0.00398355	6.05835	5.82308	0.119028	5	3.24998	3.0799	3.44494	3.39822	3.76332	4.00086	3.52297	3.64142	3.5764	2.95335	3.89095	3.82635	3.75926	3.69688	3.9225	4.16015	2.3022	2.45187	3.06196	2.49468	1.75149	2.21417	2.3274	1.84859	1.97782	1.45864	1.44708	1.36074	1.4661	1.2914	1.1124	1.12621	1.18769	0.989848	1.10936	1.27579	0.963032	1.51756	1.53619
simsample384	-46.05	4877810	3.37643	2.70986	0.00384124	0.00384124	6.04028	5.70504	0.0764449	5	3.68089	3.58906	3.87342	3.76738	4.29479	4.37801	4.01316	4.11797	3.99789	3.42764	4.45188	4.24252	4.26	4.08855	4.44567	4.56818	2.3989	2.49655	3.17473	2.55281	1.82886	2.31097	2.3903	1.89076	2.02687	1.49153	1.46545	1.38681	1.49136	1.32344	1.1462	1.17021	1.23115	1.02742	1.15462	1.31354	1.00656	1.59951	1.60641
simsample385	-53.3	4398310	3.33699	2.72291	0.00389605	0.00389605	6.07635	5.94666	0.101811	5	3.38614	3.24862	3.57659	3.51208	3.93377	4.10811	3.67393	3.78449	3.69671	3.10534	4.05429	3.94353	3.90684	3.80163	4.07206	4.26539	2.32081	2.45225	3.07683	2.49844	1.77281	2.23834	2.33974	1.86143	1.99239	1.4689	1.45152	1.37025	1.47478	1.30341	1.13022	1.14953	1.21075	1.01278	1.13588	1.30437	0.993547	1.5667	1.58095
simsample386	-49.85	4426890	3.33968	2.76916	0.00391666	0.00391666	5.7534	5.86482	0.0979691	5	3.40783	3.28228	3.60559	3.53921	3.97137	4.12839	3.70089	3.80107	3.71012	3.12498	4.07407	3.95804	3.92653	3.81695	4.09207	4.27241	2.32226	2.44599	3.07482	2.49391	1.77309	2.23706	2.33455	1.86077	1.98886	1.46736	1.4497	1.3683	1.47028	1.30104	1.12749	1.14664	1.20665	1.00869	1.13054	1.29547	0.98768	1.55934	1.57372
simsample387	-58	4429180	3.34761	2.74241	0.00394823	0.00394823	6.03199	5.97502	0.107186	5	3.30885	3.16341	3.5026	3.44825	3.85375	4.0458	3.59996	3.70718	3.62599	3.02853	3.96067	3.87082	3.82243	3.7339	3.98003	4.17867	2.29335	2.42871	3.04335	2.47715	1.75732	2.21652	2.32225	1.84811	1.97633	1.45872	1.44036	1.35836	1.46127	1.29151	1.11931	1.136	1.19464	0.99642	1.11915	1.28361	0.975166	1.53755	1.5522
simsample388	-55.3	4115160	3.29875	2.84005	0.00394916	0.00394916	6.04374	5.85073	0.106154	5	3.3117	3.1742	3.51069	3.46374	3.86909	4.04796	3.59902	3.70043	3.62052	3.02749	3.94388	3.85356	3.80665	3.71802	3.95919	4.16405	2.29935	2.43911	3.04569	2.47701	1.76285	2.22013	2.32897	1.86532	1.99113	1.47226	1.45541	1.37152	1.47619	1.30805	1.13665	1.1538	1.21395	1.015	1.13628	1.30772	0.996769	1.5668	1.58443
simsample389	-49.2	5154870	3.41774	2.63995	0.0038718	0.0038718	5.9883	6.00437	0.0948065	5	3.54394	3.42193	3.74713	3.65916	4.12006	4.27992	3.8601	3.97541	3.88122	3.27006	4.27819	4.12722	4.10812	3.98133	4.28718	4.46351	2.38648	2.50602	3.16697	2.56197	1.81414	2.29704	2.39354	1.89152	2.0247	1.48822	1.46712	1.38578	1.49294	1.32015	1.14104	1.15975	1.22023	1.01828	1.14361	1.30714	0.991718	1.57308	1.58526
simsample390	-56.4	4323670	3.3449	2.74919	0.00394898	0.00394898	5.71628	6.01223	0.101918	5	3.32878	3.19359	3.51881	3.45707	3.8727	4.03823	3.61121	3.71613	3.63068	3.04728	3.97915	3.8713	3.84093	3.74113	4.00155	4.19154	2.28474	2.41373	3.03121	2.46114	1.74613	2.20178	2.30421	1.83304	1.9604	1.44702	1.42943	1.34679	1.44803	1.28146	1.10945	1.12812	1.18757	0.991604	1.11106	1.27398	0.971369	1.53216	1.54904
simsample391	-53.85	5631160	3.43271	2.497	0.00396723	0.00396723	5.87576	5.65381	0.105778	5	3.35033	3.2059	3.54341	3.46541	3.87475	4.06667	3.63405	3.75213	3.67028	3.06519	4.04278	3.92832	3.89051	3.79045	4.05852	4.26113	2.28765	2.41786	3.05709	2.4732	1.74166	2.2099	2.31044	1.81729	1.9508	1.43073	1.41616	1.33518	1.43867	1.26717	1.09149	1.10863	1.16975	0.970917	1.09344	1.25377	0.946358	1.50441	1.5171
simsample392	-48.9	4323650	3.31398	2.67181	0.0038723	0.0038723	5.61817	5.67242	0.0825763	5	3.50555	3.41065	3.70178	3.61345	4.11039	4.20568	3.82037	3.92052	3.81103	3.24733	4.21956	4.04579	4.04813	3.89558	4.22033	4.35701	2.31619	2.42265	3.06642	2.47064	1.76799	2.23243	2.32356	1.84532	1.97341	1.45121	1.43081	1.35315	1.45501	1.28965	1.11917	1.14392	1.20474	1.00804	1.13076	1.28978	0.988866	1.56707	1.57714
simsample393	-50.5	4326220	3.33217	2.68775	0.0039104	0.0039104	5.64551	6.05592	0.101759	5	3.40722	3.2704	3.60451	3.54026	3.96865	4.14021	3.69887	3.80925	3.71935	3.11818	4.07922	3.96556	3.92987	3.82496	4.09682	4.28724	2.33091	2.4644	3.09226	2.50791	1.78289	2.24995	2.35404	1.87301	2.00683	1.48107	1.46477	1.38108	1.48609	1.31371	1.13726	1.15465	1.21599	1.01585	1.14011	1.30636	0.99434	1.56767	1.58543
simsample394	-53	4738500	3.37453	2.79354	0.00397457	0.00397457	5.89785	5.92967	0.117789	5	3.24535	3.08529	3.44284	3.403	3.76072	3.98884	3.518	3.62996	3.56298	2.94888	3.86639	3.81208	3.74631	3.67975	3.89089	4.1294	2.29727	2.44364	3.04728	2.48527	1.75382	2.21051	2.3218	1.85324	1.9825	1.46346	1.45238	1.36564	1.47119	1.29839	1.12148	1.13713	1.19866	0.999831	1.11752	1.28437	0.974005	1.53033	1.55151
simsample395	-52.75	4849930	3.36423	2.8457	0.00404658	0.00404658	5.78893	5.49284	0.11552	5	3.17545	3.01829	3.36127	3.31912	3.67971	3.89857	3.44187	3.54526	3.47901	2.88781	3.78353	3.71943	3.65779	3.5936	3.80883	4.03837	2.24762	2.38664	2.97363	2.43077	1.71847	2.16328	2.27276	1.81546	1.93965	1.43384	1.42135	1.33696	1.43993	1.27228	1.09899	1.11363	1.17035	0.975989	1.0935	1.25605	0.95382	1.49901	1.51734
simsample396	-52.6	4885550	3.39472	2.79566	0.00395052	0.00395052	5.88387	5.77683	0.0995577	5	3.36251	3.23568	3.55533	3.48611	3.90814	4.07627	3.65701	3.76425	3.6756	3.08948	4.02862	3.91211	3.88593	3.77863	4.04567	4.23358	2.29851	2.42367	3.04685	2.47127	1.7547	2.21048	2.30762	1.83267	1.95803	1.44359	1.42363	1.34336	1.44619	1.27962	1.10702	1.12505	1.18478	0.988845	1.10823	1.26916	0.965074	1.52289	1.53537
simsample397	-50.05	4326980	3.30246	2.67643	0.00394142	0.00394142	5.55444	5.69685	0.107358	5	3.29983	3.15674	3.49855	3.45113	3.85652	4.04194	3.5861	3.69198	3.60911	3.01425	3.93874	3.84907	3.80167	3.70933	3.95239	4.15869	2.28336	2.42087	3.03027	2.46925	1.75153	2.20947	2.3138	1.84671	1.97802	1.45956	1.44216	1.36109	1.46806	1.29755	1.12555	1.14119	1.20147	1.00358	1.12646	1.29266	0.983036	1.55079	1.56932
simsample398	-51.3	4946010	3.40754	2.75776	0.00391958	0.00391958	5.91246	5.89403	0.0929033	5	3.46584	3.34286	3.65808	3.57343	4.02539	4.17821	3.77128	3.87987	3.78264	3.19996	4.17255	4.02987	4.01596	3.88496	4.18709	4.35444	2.33451	2.45107	3.09192	2.50036	1.77691	2.24352	2.33894	1.84986	1.97652	1.45675	1.43856	1.36025	1.46197	1.29481	1.12054	1.14183	1.2009	1.00102	1.12323	1.28111	0.975928	1.54368	1.55275
simsample399	-52.35	4474270	3.34501	2.70354	0.00393409	0.00393409	5.76442	5.84561	0.0992385	5	3.36405	3.23804	3.56237	3.4947	3.92518	4.08837	3.66362	3.76496	3.68058	3.08957	4.03395	3.91791	3.88922	3.77709	4.05056	4.22932	2.2946	2.41795	3.0377	2.4636	1.75123	2.21382	2.31257	1.84052	1.97063	1.45371	1.43553	1.35518	1.45821	1.29306	1.11751	1.13592	1.19441	0.998234	1.12164	1.28218	0.977214	1.54164	1.55397
simsample400	-52.25	5039000	3.40292	2.60399	0.0038596	0.0038596	6.27007	5.9688	0.0936688	5	3.53429	3.41336	3.73421	3.64086	4.10425	4.25764	3.84047	3.94912	3.85785	3.25534	4.26329	4.11217	4.09525	3.96558	4.27691	4.44692	2.37217	2.48959	3.15395	2.54482	1.8049	2.28844	2.38277	1.88222	2.01666	1.48146	1.45877	1.37647	1.4819	1.31156	1.13194	1.15121	1.21131	1.01146	1.13545	1.29746	0.986962	1.56879	1.57679
simsample401	-55.7	4757400	3.3772	2.77931	0.00396793	0.00396793	6.09144	5.85066	0.106429	5	3.32922	3.18773	3.52819	3.47158	3.86996	4.06226	3.61522	3.72188	3.63715	3.0426	3.97852	3.88577	3.84121	3.74824	4.00273	4.20508	2.30534	2.43923	3.05819	2.4864	1.76142	2.22475	2.32808	1.85351	1.97817	1.46013	1.44494	1.36304	1.46621	1.29569	1.11957	1.13693	1.19705	0.999025	1.12093	1.28358	0.975237	1.53361	1.5525
simsample402	-50.4	4461590	3.34213	2.77205	0.00390962	0.00390962	5.80713	5.87642	0.100428	5	3.39884	3.26486	3.59796	3.53287	3.95917	4.12702	3.69574	3.7997	3.71195	3.12115	4.06704	3.95386	3.92177	3.8183	4.08321	4.27564	2.32995	2.45653	3.08555	2.50868	1.78181	2.24363	2.34538	1.86932	1.99769	1.47495	1.45567	1.37472	1.47833	1.30706	1.13243	1.14922	1.2106	1.01128	1.13173	1.29584	0.98829	1.55978	1.57655
simsample403	-55	4460070	3.37587	2.81384	0.00393909	0.00393909	5.72725	6.13328	0.100164	5	3.36588	3.23644	3.56062	3.49043	3.90969	4.08101	3.656	3.76845	3.68233	3.09249	4.03092	3.92062	3.88498	3.78328	4.04841	4.23937	2.30691	2.43343	3.05767	2.4838	1.76319	2.22598	2.32373	1.84666	1.97078	1.45344	1.43736	1.35688	1.45815	1.28859	1.11573	1.1354	1.19533	1.00054	1.12009	1.28329	0.977547	1.53899	1.55402
simsample404	-52.4	4246380	3.31373	2.79889	0.00390596	0.00390596	5.99243	5.81183	0.094119	5	3.4375	3.31737	3.63258	3.5656	4.01692	4.16104	3.74885	3.84873	3.75251	3.16692	4.11835	3.98855	3.96868	3.84487	4.13027	4.30263	2.3332	2.44943	3.08079	2.49791	1.78271	2.24613	2.34357	1.86886	1.99628	1.47554	1.45368	1.37403	1.47706	1.31008	1.13675	1.15831	1.21871	1.01918	1.13974	1.30334	0.996668	1.56876	1.58652
simsample405	-51.25	4900820	3.3811	2.83379	0.0039928	0.0039928	5.76071	5.64933	0.108913	5	3.27802	3.13016	3.4732	3.41991	3.8075	4.01047	3.5648	3.67136	3.59643	3.00199	3.92154	3.83941	3.79179	3.7057	3.94256	4.15029	2.28626	2.42122	3.0256	2.46562	1.74502	2.20262	2.30594	1.83751	1.95924	1.44721	1.43426	1.35128	1.45357	1.28591	1.11265	1.12799	1.18649	0.990858	1.10895	1.26975	0.964501	1.51963	1.53484
simsample406	-50.25	5575100	3.42066	2.47687	0.00393697	0.00393697	5.8093	5.62165	0.100284	5	3.4312	3.29947	3.6331	3.546	3.98589	4.16152	3.72547	3.84315	3.75368	3.14696	4.14479	4.00914	3.98003	3.86162	4.15594	4.34842	2.31632	2.44321	3.09793	2.50154	1.76521	2.24056	2.33791	1.8451	1.97603	1.44801	1.43023	1.34949	1.45289	1.2828	1.10711	1.12557	1.18622	0.986364	1.10972	1.27045	0.960903	1.53005	1.54153
simsample407	-47.7	4579200	3.38639	2.81036	0.00384663	0.00384663	5.82121	6.03886	0.0745814	5	3.65876	3.57513	3.85055	3.74487	4.27458	4.35742	3.99736	4.10059	3.97813	3.41748	4.42607	4.22131	4.23933	4.05741	4.41706	4.53111	2.38515	2.47943	3.14707	2.53173	1.81825	2.29813	2.38064	1.88069	2.00888	1.47966	1.4534	1.37639	1.47829	1.314	1.14053	1.16437	1.22439	1.02118	1.14584	1.30325	0.999371	1.58387	1.58821
simsample408	-55.95	4782560	3.36321	2.8042	0.00398849	0.00398849	5.96292	5.67193	0.119395	5	3.1809	3.0195	3.37677	3.3389	3.68952	3.92083	3.44797	3.55431	3.49412	2.88632	3.78722	3.7388	3.67525	3.6143	3.82207	4.05074	2.26082	2.41207	3.00127	2.45394	1.731	2.18197	2.29574	1.8344	1.95765	1.44799	1.43557	1.34661	1.45226	1.2817	1.10665	1.12092	1.18351	0.987988	1.10644	1.27287	0.96531	1.51471	1.53635
simsample409	-50.15	4891580	3.3832	2.84397	0.00398355	0.00398355	5.75546	5.66232	0.105815	5	3.30753	3.16857	3.50259	3.44082	3.83842	4.02685	3.59338	3.699	3.61939	3.03268	3.95826	3.86674	3.82478	3.73428	3.98169	4.18016	2.29514	2.4271	3.03695	2.47084	1.75131	2.20939	2.31562	1.84499	1.96796	1.45533	1.43748	1.3552	1.4567	1.28831	1.1142	1.13178	1.1904	0.993967	1.11261	1.27425	0.970665	1.52632	1.54365
simsample410	-51.15	4365170	3.34953	2.80158	0.00391516	0.00391516	5.68385	5.96301	0.0931736	5	3.42878	3.31043	3.61905	3.54826	3.99823	4.13725	3.72559	3.82933	3.73324	3.15665	4.10496	3.96974	3.94518	3.82606	4.11465	4.28307	2.31487	2.42876	3.05866	2.48069	1.7673	2.22899	2.32264	1.84559	1.9768	1.45898	1.43899	1.36017	1.46144	1.2936	1.12232	1.14468	1.20377	1.00666	1.12906	1.2895	0.985437	1.55642	1.5686
simsample411	-49.9	4318870	3.33014	2.80445	0.00389786	0.00389786	5.7612	5.82249	0.0883211	5	3.47998	3.37045	3.67075	3.59202	4.06152	4.18625	3.79086	3.89301	3.79169	3.21874	4.18035	4.03358	4.02476	3.8885	4.18848	4.34342	2.33494	2.44742	3.08562	2.49655	1.78505	2.25097	2.34177	1.86507	1.99493	1.47288	1.4499	1.37026	1.47275	1.30432	1.13185	1.15477	1.21434	1.01365	1.13661	1.29979	0.995342	1.57242	1.58137
simsample412	-56.9	4319600	3.34311	2.74481	0.00394898	0.00394898	5.7195	6.02114	0.104569	5	3.30814	3.16744	3.50165	3.44416	3.8531	4.03419	3.59456	3.70156	3.61609	3.03036	3.95823	3.85439	3.81882	3.72111	3.97233	4.16484	2.27886	2.41047	3.02046	2.45202	1.74054	2.19515	2.29898	1.83231	1.96131	1.44816	1.43227	1.35127	1.4535	1.28385	1.11136	1.12963	1.19117	0.994431	1.11474	1.27826	0.97237	1.53267	1.548
simsample413	-55.4	4765220	3.38384	2.8021	0.0039701	0.0039701	5.79013	5.74701	0.101179	5	3.30772	3.17485	3.49786	3.43175	3.84354	4.01214	3.59345	3.69892	3.6167	3.03497	3.96327	3.85453	3.82337	3.72328	3.98221	4.16791	2.27116	2.39531	3.0048	2.43719	1.73263	2.18516	2.28394	1.81468	1.94062	1.43197	1.41624	1.33464	1.43534	1.27037	1.09918	1.11587	1.17426	0.980718	1.09952	1.25979	0.95913	1.51209	1.52654
simsample414	-58.25	4480530	3.35398	2.74128	0.00400224	0.00400224	5.72	5.96097	0.117351	5	3.18519	3.02887	3.37733	3.33548	3.69651	3.92431	3.45579	3.56276	3.4931	2.89137	3.79373	3.73034	3.67008	3.61284	3.82548	4.05706	2.25603	2.40165	2.99404	2.44139	1.72241	2.17253	2.28514	1.82472	1.95166	1.43915	1.42524	1.3416	1.44404	1.27324	1.10097	1.11496	1.17535	0.982183	1.10087	1.26659	0.959943	1.50584	1.52614
simsample415	-56.25	4339350	3.32983	2.79013	0.00392917	0.00392917	6.03422	5.93565	0.112077	5	3.27855	3.13075	3.47823	3.4375	3.8218	4.02906	3.55983	3.66648	3.58959	2.98889	3.91193	3.83792	3.78634	3.71153	3.94453	4.15683	2.30576	2.44586	3.0517	2.48634	1.75912	2.21494	2.32523	1.8577	1.98572	1.46795	1.45359	1.36838	1.47303	1.30065	1.12511	1.1425	1.20137	1.00384	1.12639	1.29212	0.984011	1.54789	1.56904
simsample416	-53.3	4436060	3.35295	2.71489	0.00393507	0.00393507	5.7266	6.03699	0.100624	5	3.38614	3.25546	3.58279	3.51488	3.94744	4.11528	3.68612	3.79246	3.7026	3.11028	4.06375	3.94921	3.9107	3.80674	4.06867	4.25508	2.31431	2.44223	3.0683	2.49124	1.77034	2.23485	2.33296	1.8571	1.98495	1.46566	1.44696	1.36472	1.46858	1.29816	1.12307	1.14278	1.20203	1.00312	1.12522	1.28712	0.980666	1.54963	1.56593
simsample417	-51.1	5571300	3.41839	2.45776	0.00393697	0.00393697	5.85822	5.65047	0.105092	5	3.39104	3.25378	3.59508	3.51436	3.93564	4.12408	3.68398	3.79832	3.71154	3.09901	4.09167	3.97177	3.93703	3.82829	4.10537	4.30005	2.3042	2.439	3.08552	2.49544	1.75502	2.22882	2.33277	1.83993	1.97198	1.4468	1.43342	1.35095	1.45544	1.28305	1.10454	1.12155	1.18185	0.982167	1.10491	1.26849	0.957884	1.52292	1.53609
simsample418	-56.85	5349500	3.42697	2.68614	0.00398769	0.00398769	6.02835	5.86867	0.118703	5	3.25179	3.08574	3.44671	3.3945	3.7536	3.99224	3.52013	3.63972	3.57144	2.95489	3.88859	3.83139	3.76166	3.69803	3.92301	4.16201	2.29741	2.44629	3.05773	2.49277	1.74958	2.21002	2.32054	1.84278	1.9698	1.45119	1.4427	1.35699	1.45944	1.2846	1.10697	1.12193	1.18299	0.983364	1.10319	1.2669	0.955737	1.50787	1.52257
simsample419	-48.5	4458440	3.36567	2.83557	0.0038768	0.0038768	5.80375	6.05921	0.0879578	5	3.53939	3.42326	3.72936	3.65152	4.1217	4.24956	3.84867	3.95093	3.84856	3.27336	4.24443	4.0931	4.08628	3.95092	4.26061	4.41716	2.3712	2.48727	3.13532	2.5369	1.81239	2.28733	2.37545	1.88686	2.01508	1.48647	1.46532	1.3857	1.48758	1.31821	1.14332	1.1639	1.22386	1.02245	1.1469	1.30791	1.00175	1.58187	1.59489
simsample420	-50.55	4413520	3.33862	2.71056	0.00388312	0.00388312	5.99894	5.99758	0.0940535	5	3.50687	3.38278	3.70878	3.63343	4.09301	4.23967	3.81817	3.92172	3.82775	3.23056	4.20799	4.06323	4.0408	3.91833	4.21402	4.38818	2.36436	2.48436	3.13043	2.53909	1.80517	2.28081	2.38106	1.89219	2.02378	1.49282	1.46923	1.38822	1.49594	1.32484	1.14928	1.17131	1.23116	1.02714	1.15216	1.31809	1.00698	1.59443	1.60558
simsample421	-52.75	4938390	3.41103	2.8172	0.00395052	0.00395052	5.95946	5.88872	0.0965483	5	3.41195	3.28613	3.60104	3.5223	3.95075	4.11608	3.70166	3.81201	3.72072	3.13818	4.09043	3.96363	3.93829	3.82923	4.10812	4.28425	2.31806	2.4344	3.0659	2.48805	1.76845	2.23328	2.32828	1.84369	1.97327	1.45364	1.43521	1.35243	1.45292	1.28557	1.11245	1.13048	1.18943	0.993376	1.11489	1.27275	0.9679	1.52661	1.5401
simsample422	-56.05	4470370	3.3747	2.78316	0.00390179	0.00390179	6.0081	6.13029	0.0924349	5	3.46227	3.34244	3.65467	3.57666	4.02767	4.17177	3.77084	3.87946	3.77977	3.19752	4.16278	4.02788	4.01536	3.8857	4.17973	4.341	2.33605	2.45273	3.09347	2.50319	1.78226	2.24895	2.3439	1.86024	1.99056	1.46504	1.44439	1.36557	1.46653	1.30054	1.12485	1.14563	1.20522	1.00749	1.12929	1.29075	0.984964	1.55581	1.56637
simsample423	-57.4	4881080	3.41431	2.9075	0.00402296	0.00402296	5.72253	5.84717	0.105829	5	3.2468	3.10617	3.43509	3.37595	3.76092	3.9476	3.52277	3.6367	3.56003	2.97831	3.88375	3.79631	3.75093	3.66241	3.90893	4.10774	2.25518	2.38102	2.97979	2.42673	1.72101	2.16777	2.26901	1.80148	1.92394	1.42075	1.40415	1.32325	1.42397	1.25822	1.08623	1.10213	1.16178	0.969293	1.0859	1.24412	0.945948	1.48451	1.49953
simsample424	-52.65	4811060	3.37498	2.80078	0.00398355	0.00398355	5.81448	5.65413	0.106498	5	3.27268	3.13232	3.46605	3.40253	3.79513	3.98365	3.54814	3.65588	3.57469	2.98933	3.90557	3.81727	3.77539	3.68726	3.92986	4.13254	2.26673	2.39626	3.0007	2.44067	1.72889	2.1794	2.28689	1.82122	1.94525	1.4346	1.41786	1.3377	1.4411	1.27343	1.10467	1.12164	1.18092	0.985381	1.10417	1.26445	0.960199	1.51186	1.52544
simsample425	-51.15	5014630	3.41029	2.89246	0.00401625	0.00401625	5.62703	5.72055	0.106191	5	3.27764	3.13754	3.4687	3.40895	3.79981	3.99519	3.56076	3.67258	3.59097	3.00778	3.92165	3.82927	3.78389	3.6946	3.94256	4.14445	2.27453	2.40079	3.00582	2.44784	1.7338	2.18682	2.28988	1.81998	1.94706	1.43682	1.42125	1.33874	1.43664	1.27012	1.0979	1.11444	1.17444	0.979273	1.09718	1.25641	0.953781	1.49881	1.51428
simsample426	-58.75	4409630	3.36559	2.81194	0.0039765	0.0039765	5.87378	6.07496	0.106732	5	3.27645	3.13726	3.47039	3.41606	3.8038	3.99415	3.55908	3.66167	3.58271	2.99537	3.91339	3.82409	3.78275	3.69285	3.93885	4.144	2.27525	2.40662	3.01247	2.45128	1.73489	2.18993	2.29106	1.82804	1.95217	1.44207	1.42713	1.34345	1.44182	1.27585	1.10683	1.12348	1.18254	0.987791	1.1058	1.26617	0.965089	1.52049	1.53693
simsample427	-52.3	5403330	3.43282	2.69027	0.00395988	0.00395988	5.98954	5.79797	0.10651	5	3.36269	3.21756	3.55788	3.48572	3.89012	4.09247	3.65587	3.77346	3.69008	3.08444	4.04702	3.94449	3.90401	3.81555	4.07029	4.27891	2.32509	2.45615	3.08743	2.50196	1.7645	2.23093	2.33492	1.84955	1.97699	1.45208	1.43665	1.35225	1.45947	1.28798	1.11217	1.1281	1.18957	0.989097	1.11077	1.27169	0.962987	1.52394	1.53741
simsample428	-50.5	4274830	3.29168	2.73361	0.00389788	0.00389788	6.06287	5.76335	0.108229	5	3.36781	3.22537	3.57211	3.52347	3.92982	4.11732	3.6565	3.76206	3.6787	3.06584	4.00911	3.92126	3.8764	3.79155	4.04124	4.25231	2.34741	2.49204	3.10947	2.53313	1.79695	2.26382	2.37448	1.89819	2.02767	1.49891	1.48176	1.39638	1.50492	1.33255	1.15677	1.17471	1.23639	1.03186	1.15777	1.32995	1.01188	1.59344	1.60878
simsample429	-53.45	4743910	3.34797	2.80525	0.00403799	0.00403799	5.74805	5.46668	0.11454	5	3.17763	3.02467	3.36774	3.32459	3.68591	3.89796	3.44035	3.54107	3.47481	2.88912	3.78064	3.71554	3.65586	3.5901	3.80862	4.03075	2.23837	2.37955	2.96647	2.42175	1.71102	2.15495	2.2612	1.80855	1.93257	1.42818	1.4156	1.33307	1.43671	1.27024	1.09835	1.11307	1.1719	0.978986	1.09426	1.25663	0.954615	1.50014	1.51674
simsample430	-54.35	4910120	3.41076	2.75959	0.00393502	0.00393502	5.96501	5.91589	0.0933031	5	3.4298	3.30664	3.61778	3.53627	3.98142	4.13162	3.73035	3.83955	3.74006	3.16724	4.1331	3.99347	3.97562	3.85283	4.14949	4.31493	2.31701	2.43508	3.07191	2.48279	1.76495	2.23046	2.32272	1.83697	1.96274	1.44449	1.42591	1.34715	1.44705	1.27833	1.10603	1.1265	1.18598	0.988417	1.1102	1.26962	0.96718	1.52977	1.53726
simsample431	-50	4396620	3.32497	2.77198	0.00391666	0.00391666	5.91027	5.87071	0.106846	5	3.36752	3.22235	3.5665	3.51471	3.92217	4.11296	3.65744	3.7637	3.68369	3.076	4.01774	3.92953	3.88222	3.79095	4.03655	4.24423	2.33444	2.47405	3.09467	2.51779	1.786	2.25185	2.35985	1.88347	2.01557	1.48834	1.47275	1.3868	1.49162	1.3182	1.14241	1.16024	1.2199	1.01951	1.14328	1.31126	0.998933	1.57248	1.59327
simsample432	-53.35	5377030	3.43083	2.68078	0.00395988	0.00395988	6.02963	5.73621	0.101427	5	3.38261	3.24847	3.57829	3.49911	3.91584	4.0956	3.67049	3.78516	3.69939	3.10279	4.07317	3.9532	3.9228	3.81489	4.09335	4.28501	2.3128	2.43676	3.07213	2.48665	1.75803	2.22264	2.32218	1.83533	1.96567	1.44857	1.43226	1.34924	1.45068	1.28231	1.1061	1.12268	1.18253	0.984372	1.1036	1.26332	0.958632	1.51852	1.53156
simsample433	-54.35	4809620	3.34045	2.83538	0.00406891	0.00406891	5.81297	5.3478	0.125458	5	3.08013	2.91015	3.26724	3.24487	3.57065	3.81013	3.32909	3.44098	3.38481	2.78757	3.65106	3.62233	3.54051	3.49986	3.68704	3.93154	2.2218	2.37533	2.94445	2.41395	1.70131	2.13763	2.25438	1.80875	1.9314	1.42814	1.4191	1.33338	1.43454	1.26382	1.09391	1.10614	1.16497	0.971962	1.0886	1.25545	0.949709	1.48619	1.51047
simsample434	-54.25	4389920	3.36474	2.80356	0.00388164	0.00388164	6.0232	6.06168	0.0869765	5	3.49273	3.38396	3.68212	3.59668	4.0692	4.19386	3.80841	3.91097	3.80746	3.23777	4.20544	4.05155	4.04359	3.9035	4.20757	4.35624	2.32905	2.44132	3.0846	2.49339	1.77719	2.24287	2.33507	1.85223	1.98239	1.45953	1.43712	1.35861	1.46065	1.29565	1.12351	1.1455	1.20483	1.0066	1.12958	1.28765	0.985704	1.55726	1.56706
simsample435	-50.3	4304810	3.32685	2.68677	0.0039104	0.0039104	5.60904	6.04147	0.103414	5	3.39256	3.25302	3.59133	3.5276	3.94817	4.12933	3.6863	3.7937	3.70799	3.10919	4.06557	3.95876	3.91421	3.8116	4.07648	4.27121	2.33013	2.46623	3.0929	2.51452	1.78343	2.25094	2.35765	1.87587	2.007	1.48159	1.46316	1.38172	1.48459	1.31244	1.13842	1.15685	1.21825	1.01749	1.14266	1.31284	0.999333	1.5761	1.5903
simsample436	-61.9	5609080	3.43598	2.45169	0.0040228	0.0040228	6.02253	5.80656	0.12025	5	3.20672	3.04264	3.40856	3.34507	3.70512	3.94878	3.47765	3.59712	3.53294	2.91163	3.86167	3.78605	3.72254	3.65672	3.88443	4.12096	2.25297	2.40011	3.0152	2.45052	1.71359	2.17592	2.28711	1.80754	1.93824	1.42246	1.41201	1.32743	1.43161	1.25708	1.07994	1.09389	1.15487	0.959022	1.07758	1.23888	0.930006	1.47458	1.49297
simsample437	-56	4868460	3.40906	2.91327	0.00402296	0.00402296	5.72507	5.85082	0.106465	5	3.26491	3.12067	3.45733	3.39788	3.78337	3.97489	3.54831	3.65304	3.57845	2.99301	3.89758	3.80848	3.76561	3.68083	3.9255	4.13312	2.27205	2.39856	3.00427	2.44645	1.7348	2.18366	2.28167	1.81768	1.94274	1.43278	1.41732	1.33607	1.43602	1.27035	1.09516	1.10836	1.16772	0.976874	1.09582	1.25394	0.952583	1.4962	1.51082
simsample438	-49.2	5081430	3.4024	2.61263	0.0038615	0.0038615	6.1742	5.96115	0.0902549	5	3.61062	3.49373	3.81091	3.71841	4.20046	4.34078	3.92316	4.04004	3.94183	3.33693	4.36431	4.19926	4.18796	4.0487	4.37006	4.53322	2.40827	2.52305	3.19596	2.58111	1.83212	2.3233	2.41341	1.9068	2.04178	1.49879	1.4784	1.39817	1.503	1.33038	1.14868	1.17034	1.2315	1.02647	1.1554	1.31891	1.0047	1.59291	1.60062
simsample439	-54.85	4823820	3.34067	2.82752	0.00406891	0.00406891	5.81387	5.32969	0.126122	5	3.06787	2.89812	3.26025	3.23722	3.55978	3.80849	3.32351	3.43084	3.3729	2.77602	3.63657	3.60899	3.53307	3.49129	3.67287	3.91578	2.21404	2.3714	2.93755	2.40934	1.69904	2.13673	2.25318	1.80543	1.92604	1.42435	1.41517	1.33016	1.43325	1.26305	1.0917	1.10339	1.16336	0.970336	1.087	1.25041	0.947402	1.48303	1.50727
simsample440	-55.8	4221190	3.31829	2.77153	0.00393958	0.00393958	5.88041	5.80785	0.0964511	5	3.35288	3.22954	3.54865	3.47942	3.91503	4.06937	3.65735	3.75561	3.66518	3.09223	4.02483	3.89628	3.87127	3.7562	4.02711	4.1968	2.2794	2.39821	3.01529	2.44775	1.74465	2.20155	2.29702	1.83014	1.95673	1.44765	1.42758	1.3456	1.445	1.28034	1.10887	1.12855	1.18712	0.990719	1.11171	1.27669	0.977061	1.53913	1.5559
simsample441	-50.55	5572690	3.41965	2.47662	0.00393697	0.00393697	5.81045	5.61797	0.102521	5	3.40522	3.26824	3.6061	3.52828	3.94979	4.13778	3.70628	3.81984	3.7298	3.12131	4.11669	3.99374	3.95516	3.84401	4.12749	4.31746	2.30841	2.43948	3.08531	2.49055	1.75724	2.23105	2.33286	1.83662	1.97012	1.44655	1.42993	1.34757	1.45207	1.282	1.10376	1.12275	1.18406	0.985016	1.10846	1.27002	0.960381	1.52579	1.53783
simsample442	-50.35	4159700	3.32041	2.7865	0.00385577	0.00385577	6.01218	6.0224	0.0830477	5	3.58024	3.48167	3.77935	3.6979	4.20044	4.30318	3.91384	4.01299	3.8999	3.32694	4.3122	4.13976	4.13756	3.98473	4.3107	4.44968	2.37829	2.48821	3.14136	2.53774	1.81856	2.29496	2.38342	1.8962	2.02841	1.49522	1.46955	1.39106	1.49624	1.32796	1.15404	1.17655	1.23802	1.03389	1.15929	1.32471	1.01634	1.60663	1.6184
simsample443	-55.15	4832180	3.36299	2.8154	0.00402083	0.00402083	5.92004	5.48124	0.108114	5	3.23921	3.09274	3.42872	3.37752	3.7599	3.9541	3.51724	3.61806	3.54032	2.95688	3.86333	3.78331	3.73603	3.65309	3.89031	4.09347	2.25578	2.38609	2.98262	2.42989	1.72157	2.17046	2.27115	1.81207	1.93739	1.42892	1.41333	1.33209	1.43348	1.26762	1.09819	1.11461	1.17257	0.979805	1.09831	1.2589	0.95767	1.50598	1.52429
simsample444	-50.05	4451760	3.34275	2.69312	0.00389598	0.00389598	5.66423	5.94468	0.0966657	5	3.44391	3.31672	3.63896	3.57305	4.01767	4.17184	3.74912	3.84857	3.75287	3.16402	4.13412	4.0016	3.97394	3.86137	4.14545	4.32311	2.33511	2.46115	3.10021	2.51454	1.78616	2.25633	2.35865	1.87379	2.0044	1.47472	1.45532	1.37457	1.47759	1.30654	1.13019	1.15225	1.21088	1.0124	1.13565	1.3002	0.990361	1.56948	1.58194
simsample445	-54.85	4868010	3.39848	2.89982	0.00402296	0.00402296	5.7402	5.82022	0.115095	5	3.20167	3.0447	3.38932	3.34371	3.70125	3.92202	3.47564	3.58259	3.51709	2.92151	3.81897	3.75736	3.69535	3.63145	3.84768	4.07228	2.26628	2.40711	2.99758	2.45053	1.73122	2.18118	2.28827	1.82229	1.94234	1.43392	1.42446	1.34096	1.44428	1.27763	1.10514	1.11815	1.18036	0.983062	1.10118	1.261	0.957023	1.49946	1.51756
simsample446	-52.6	4853950	3.35832	2.7689	0.00400665	0.00400665	5.79668	5.47843	0.110744	5	3.23234	3.08067	3.42318	3.37519	3.75789	3.95739	3.50827	3.61692	3.54337	2.95319	3.86852	3.78363	3.72861	3.65029	3.87619	4.09147	2.25802	2.39465	2.99511	2.43863	1.72635	2.17656	2.28564	1.82295	1.94752	1.43564	1.41939	1.33646	1.43925	1.27156	1.10085	1.11697	1.17732	0.982269	1.10157	1.26392	0.959256	1.50984	1.52496
simsample447	-52.25	4308040	3.33025	2.73266	0.00393369	0.00393369	5.78425	5.97893	0.102702	5	3.3656	3.23022	3.56481	3.50899	3.93461	4.10793	3.66199	3.76784	3.68293	3.08825	4.02943	3.92616	3.88878	3.78725	4.04932	4.24283	2.31868	2.44718	3.06658	2.49219	1.77098	2.23288	2.33852	1.86457	1.99139	1.47106	1.45374	1.36987	1.47327	1.30193	1.12841	1.14722	1.20646	1.00981	1.13048	1.29761	0.988911	1.55752	1.57326
simsample448	-55.55	4150520	3.29679	2.78213	0.00392178	0.00392178	5.92213	5.65105	0.0932538	5	3.3629	3.25151	3.55871	3.48973	3.93463	4.07269	3.66443	3.76195	3.66798	3.09996	4.02642	3.89762	3.87884	3.75652	4.03506	4.19795	2.27326	2.39486	3.0095	2.43989	1.7439	2.19556	2.29008	1.82804	1.954	1.44388	1.42274	1.34334	1.44428	1.28126	1.11329	1.13341	1.19009	0.995694	1.11744	1.27889	0.97925	1.54435	1.55783
simsample449	-55.5	4745480	3.34638	2.8065	0.00403799	0.00403799	5.72382	5.46625	0.121522	5	3.10912	2.94455	3.298	3.26631	3.60582	3.83964	3.37049	3.47642	3.41479	2.82178	3.69824	3.65174	3.5805	3.52801	3.72742	3.95802	2.222	2.36992	2.94518	2.41037	1.70124	2.14204	2.25631	1.80352	1.92766	1.4265	1.41488	1.32995	1.43166	1.26378	1.0926	1.10606	1.16581	0.972231	1.08909	1.25334	0.949881	1.49018	1.51323
simsample450	-50.6	4491650	3.34943	2.65522	0.00391788	0.00391788	5.52764	5.87859	0.0942445	5	3.41265	3.29543	3.60496	3.52772	3.97322	4.11648	3.712	3.81524	3.71994	3.14361	4.10566	3.96835	3.94522	3.82274	4.11345	4.28118	2.29521	2.41557	3.04643	2.4649	1.75179	2.21514	2.31235	1.83498	1.96526	1.44651	1.42916	1.35098	1.45267	1.28619	1.1128	1.13477	1.19663	0.996878	1.1202	1.28182	0.977929	1.54476	1.56003
simsample451	-50.25	4409320	3.32928	2.7733	0.00391666	0.00391666	5.88162	5.85859	0.104001	5	3.37983	3.24573	3.58012	3.52389	3.94201	4.12583	3.67773	3.78436	3.69466	3.09408	4.03882	3.93631	3.89031	3.79586	4.05291	4.25076	2.33093	2.46532	3.09304	2.51175	1.78429	2.25093	2.35856	1.88207	2.00983	1.48469	1.46677	1.38499	1.48974	1.31913	1.14108	1.15744	1.21684	1.01712	1.1396	1.30886	0.999768	1.57504	1.59052
simsample452	-48	5620400	3.41453	2.46081	0.00393697	0.00393697	5.77838	5.63033	0.111354	5	3.35476	3.20123	3.55584	3.4824	3.8808	4.09875	3.6446	3.75716	3.67473	3.05035	4.03378	3.93662	3.89041	3.79803	4.0587	4.27382	2.31208	2.45767	3.09563	2.50848	1.76179	2.23647	2.34514	1.85071	1.98373	1.45391	1.44318	1.36003	1.46592	1.29242	1.1142	1.12788	1.18921	0.987004	1.10998	1.27648	0.963396	1.53051	1.54631
simsample453	-54.5	4866200	3.40816	2.90518	0.00402296	0.00402296	5.74245	5.86493	0.106723	5	3.27083	3.12974	3.45816	3.40222	3.7907	3.98671	3.55636	3.66523	3.58567	2.99794	3.90758	3.82027	3.77502	3.68919	3.9341	4.13952	2.27526	2.40382	3.01191	2.453	1.73701	2.18778	2.29216	1.82439	1.94585	1.43769	1.4234	1.34122	1.44245	1.27531	1.10346	1.11887	1.17535	0.98015	1.09826	1.25638	0.95408	1.49882	1.51407
simsample454	-54.35	5294800	3.42149	2.7137	0.00394539	0.00394539	6.14284	5.78799	0.108238	5	3.3443	3.19821	3.5436	3.47705	3.87482	4.08081	3.63196	3.74485	3.66252	3.06041	4.01477	3.92001	3.87988	3.78963	4.0423	4.25354	2.31962	2.45292	3.07961	2.50236	1.76811	2.23312	2.3382	1.85222	1.98096	1.45874	1.44418	1.35948	1.46365	1.29182	1.11542	1.13128	1.18962	0.991937	1.11292	1.27496	0.965033	1.52218	1.53944
simsample455	-50.5	4149290	3.33669	2.81676	0.00384376	0.00384376	6.02544	6.06863	0.0707457	5	3.66618	3.5909	3.85855	3.75253	4.30368	4.35681	4.0115	4.10575	3.97632	3.42376	4.42249	4.20918	4.24061	4.06065	4.42495	4.52421	2.37604	2.4673	3.13431	2.52023	1.81474	2.29353	2.3731	1.88041	2.01437	1.48385	1.45463	1.37888	1.47801	1.31754	1.14295	1.16944	1.2278	1.02813	1.15382	1.31057	1.00797	1.59887	1.60367
simsample456	-53.95	4905160	3.3858	2.79063	0.00397791	0.00397791	5.83819	5.59734	0.100053	5	3.3145	3.18565	3.50315	3.44249	3.85748	4.02514	3.60668	3.71333	3.63088	3.05129	3.98167	3.86513	3.83183	3.7283	3.99182	4.17226	2.2657	2.38867	3.00133	2.43545	1.72886	2.18238	2.27712	1.8058	1.93065	1.42462	1.40745	1.32684	1.43099	1.26561	1.09284	1.11254	1.17014	0.976751	1.09426	1.2527	0.953533	1.50379	1.51921
simsample457	-55.5	4823330	3.35272	2.81771	0.00405626	0.00405626	5.75468	5.41276	0.120449	5	3.11043	2.94525	3.29775	3.26673	3.61271	3.84064	3.37604	3.48219	3.41751	2.82388	3.69847	3.64914	3.57869	3.52368	3.72221	3.96105	2.21992	2.36732	2.94333	2.40452	1.69471	2.13654	2.24635	1.79862	1.92184	1.42055	1.40943	1.32557	1.42884	1.26103	1.09015	1.10357	1.16286	0.972234	1.08842	1.24907	0.945333	1.48521	1.50643
simsample458	-51.65	4290030	3.33716	2.78394	0.00393468	0.00393468	5.6814	5.97303	0.101065	5	3.34635	3.21481	3.54209	3.47623	3.89509	4.0655	3.63817	3.74271	3.66121	3.07342	4.00881	3.8992	3.86356	3.76051	4.01801	4.20776	2.2981	2.42439	3.04047	2.46931	1.75728	2.2189	2.32116	1.85038	1.9775	1.45848	1.44059	1.35902	1.46171	1.29219	1.12048	1.13887	1.19822	1.00443	1.12544	1.28978	0.984038	1.54907	1.56239
simsample459	-51.15	4524700	3.34073	2.70777	0.00393409	0.00393409	5.81901	5.852	0.105277	5	3.35984	3.21996	3.55731	3.49741	3.90725	4.09404	3.64362	3.75361	3.67284	3.07236	4.01938	3.9133	3.86792	3.77366	4.03098	4.23878	2.31961	2.4526	3.08002	2.50513	1.77573	2.23857	2.34184	1.86551	1.99291	1.4715	1.45448	1.37163	1.47545	1.30396	1.12941	1.15009	1.21248	1.01181	1.1321	1.29838	0.987183	1.5593	1.57421
simsample460	-51	5323810	3.42788	2.71715	0.00391708	0.00391708	6.05405	5.86909	0.102419	5	3.44588	3.30634	3.64838	3.57164	3.99506	4.18507	3.74843	3.86811	3.77997	3.1681	4.14971	4.0417	4.00103	3.89519	4.16858	4.36916	2.36627	2.49506	3.14404	2.5487	1.80306	2.28256	2.38193	1.88424	2.01185	1.48119	1.46315	1.37886	1.48192	1.30843	1.13034	1.14846	1.20931	1.00846	1.13047	1.29209	0.979111	1.55053	1.56335
simsample461	-54.5	4410290	3.3645	2.80798	0.00392673	0.00392673	5.93166	6.12293	0.0981061	5	3.41079	3.27995	3.60625	3.53432	3.96459	4.12907	3.70645	3.80658	3.71885	3.13115	4.08161	3.9621	3.93362	3.82594	4.09857	4.28517	2.32887	2.45198	3.07948	2.49955	1.77836	2.24224	2.34102	1.86131	1.98888	1.4674	1.44757	1.36615	1.46945	1.2993	1.12553	1.14592	1.20665	1.00831	1.13071	1.29194	0.98565	1.55476	1.56713
simsample462	-54.05	4228150	3.31992	2.79898	0.00390596	0.00390596	6.00834	5.81079	0.090321	5	3.43201	3.32281	3.62246	3.5513	4.00833	4.13593	3.73342	3.83356	3.73172	3.1655	4.1177	3.9693	3.95351	3.82484	4.11485	4.27376	2.30686	2.42154	3.04783	2.46791	1.76381	2.22899	2.31784	1.84558	1.97538	1.45851	1.43697	1.36002	1.46079	1.29454	1.12314	1.14493	1.20358	1.00642	1.12798	1.29093	0.989642	1.56285	1.57404
simsample463	-57.35	4214550	3.30024	2.75354	0.00394553	0.00394553	6.11251	5.77785	0.107705	5	3.29462	3.15223	3.49209	3.4441	3.84649	4.03131	3.58101	3.68216	3.60129	3.00858	3.9251	3.8398	3.78947	3.70163	3.94374	4.14857	2.28935	2.42951	3.03752	2.47794	1.75619	2.21087	2.31654	1.85307	1.98071	1.4631	1.44721	1.36476	1.46969	1.29961	1.12965	1.14512	1.2061	1.00846	1.13014	1.29917	0.989507	1.55732	1.57281
simsample464	-51	4248150	3.2963	2.81215	0.00392328	0.00392328	6.04597	5.68252	0.102254	5	3.36941	3.23467	3.56952	3.517	3.93969	4.10886	3.67011	3.76878	3.67741	3.08877	4.0203	3.91478	3.87496	3.77374	4.03269	4.22672	2.31951	2.45402	3.06588	2.4953	1.77897	2.23976	2.34357	1.87272	1.99699	1.47927	1.46039	1.37778	1.48185	1.31104	1.13846	1.15822	1.21946	1.01988	1.14348	1.31153	1.00327	1.58011	1.5996
simsample465	-57.5	4379390	3.33564	2.82344	0.00396448	0.00396448	5.96015	5.93229	0.118418	5	3.21271	3.05299	3.41056	3.37735	3.73733	3.96058	3.48593	3.5901	3.52083	2.91526	3.81841	3.76392	3.6965	3.63649	3.84488	4.08102	2.28031	2.42953	3.02177	2.47543	1.7488	2.20154	2.31308	1.84947	1.97637	1.46325	1.4487	1.36346	1.46776	1.29585	1.12162	1.13349	1.19361	0.996995	1.11797	1.28704	0.977676	1.53419	1.55481
simsample466	-53.25	4726100	3.37245	2.78772	0.00398849	0.00398849	5.81015	5.75911	0.10863	5	3.25947	3.1162	3.45951	3.40056	3.78587	3.98005	3.53118	3.63636	3.5599	2.9721	3.88864	3.80668	3.75801	3.67622	3.91672	4.12347	2.26855	2.40026	3.00484	2.44524	1.73053	2.17886	2.28926	1.82231	1.9484	1.43889	1.42301	1.3402	1.44306	1.27519	1.10169	1.11833	1.1809	0.985493	1.10292	1.26443	0.960067	1.51054	1.53016
simsample467	-50.9	4886800	3.38273	2.84327	0.00398355	0.00398355	5.7656	5.66369	0.107142	5	3.29176	3.15033	3.48862	3.4354	3.82866	4.01576	3.57849	3.68545	3.60628	3.01415	3.93239	3.84508	3.79886	3.70906	3.95187	4.15477	2.28634	2.4174	3.02399	2.46181	1.74443	2.19963	2.30305	1.83285	1.95912	1.4494	1.43343	1.34986	1.45097	1.28435	1.10983	1.12586	1.18516	0.988902	1.10635	1.27058	0.966468	1.52197	1.54029
simsample468	-59.8	5484030	3.41548	2.49926	0.00404407	0.00404407	5.96177	5.75449	0.130198	5	3.12649	2.94722	3.32703	3.28733	3.61117	3.88211	3.38668	3.50158	3.44761	2.82084	3.7459	3.70819	3.62553	3.58265	3.78335	4.04148	2.24551	2.40471	3.00276	2.45191	1.71015	2.16691	2.28372	1.81338	1.94078	1.42662	1.42181	1.33597	1.44074	1.26574	1.08957	1.10057	1.161	0.96497	1.08187	1.24989	0.938022	1.48267	1.50228
simsample469	-46.9	4995120	3.39302	2.67504	0.00384124	0.00384124	6.08768	5.78058	0.0795117	5	3.66039	3.56506	3.86019	3.75096	4.27142	4.36789	3.98983	4.09503	3.97891	3.40128	4.43012	4.23211	4.24139	4.06979	4.41802	4.54991	2.3911	2.49615	3.17274	2.55114	1.82392	2.31074	2.39455	1.89004	2.02709	1.48835	1.46357	1.38455	1.49087	1.32377	1.1431	1.16686	1.22694	1.02405	1.14952	1.30932	1.00112	1.59016	1.59709
simsample470	-52.25	4323880	3.33201	2.75707	0.00390276	0.00390276	5.85957	5.92497	0.0992122	5	3.38711	3.26227	3.58593	3.52522	3.95578	4.11943	3.6885	3.79402	3.69733	3.11451	4.06299	3.94633	3.92058	3.80678	4.08166	4.26218	2.31989	2.44753	3.06844	2.49273	1.77109	2.23304	2.33261	1.8577	1.98437	1.4638	1.4446	1.3643	1.46828	1.30228	1.12851	1.14773	1.20902	1.00987	1.13287	1.29796	0.989563	1.56004	1.57616
simsample471	-54.15	5008050	3.39624	2.60126	0.00388096	0.00388096	6.13785	5.75524	0.0847	5	3.5377	3.43618	3.73079	3.63197	4.12236	4.23758	3.85411	3.96694	3.86185	3.28301	4.28518	4.10986	4.10665	3.95364	4.28503	4.42775	2.33496	2.43856	3.09741	2.49329	1.77538	2.24938	2.33965	1.84608	1.97711	1.45205	1.43163	1.35331	1.45577	1.29057	1.11609	1.13866	1.1959	0.996472	1.11961	1.27872	0.975955	1.55133	1.55979
simsample472	-52.7	4326550	3.3306	2.73202	0.00393369	0.00393369	5.78749	5.9871	0.107224	5	3.32939	3.18582	3.52215	3.46773	3.87417	4.06803	3.62359	3.73182	3.64816	3.04798	3.98992	3.89541	3.85011	3.75893	4.00211	4.20904	2.30938	2.44832	3.06413	2.49452	1.76742	2.22821	2.33219	1.86119	1.98788	1.46722	1.45092	1.36781	1.47089	1.30139	1.12625	1.14387	1.20364	1.00455	1.12713	1.29575	0.986231	1.55456	1.57402
simsample473	-54.45	4421550	3.33353	2.67912	0.00394233	0.00394233	5.93112	5.99456	0.1131	5	3.3017	3.14764	3.50497	3.45746	3.84794	4.05428	3.58613	3.69293	3.62104	3.00567	3.94743	3.86642	3.80662	3.73172	3.96347	4.18631	2.31076	2.4564	3.06865	2.50345	1.76761	2.23039	2.34449	1.86772	1.99678	1.47281	1.45778	1.37384	1.47974	1.30766	1.13258	1.14919	1.21003	1.00974	1.13154	1.29942	0.985506	1.55457	1.5748
simsample474	-52.05	4336850	3.34733	2.82279	0.0039053	0.0039053	6.02488	6.1265	0.101215	5	3.4224	3.28464	3.61826	3.55527	3.986	4.16313	3.71826	3.82778	3.7353	3.13756	4.08579	3.98271	3.94494	3.84231	4.10975	4.3046	2.35231	2.47998	3.11135	2.52606	1.79522	2.25988	2.358	1.88071	2.00925	1.48596	1.46904	1.38437	1.49144	1.31729	1.14411	1.16262	1.22362	1.02307	1.14854	1.31594	1.00326	1.58222	1.59604
simsample475	-54.4	4280450	3.31439	2.76709	0.00394054	0.00394054	5.92844	5.78108	0.101684	5	3.34371	3.21288	3.53755	3.48233	3.90635	4.07229	3.63724	3.73727	3.65025	3.06138	3.99019	3.88869	3.85982	3.75815	4.01325	4.20159	2.2979	2.42693	3.04095	2.47046	1.75622	2.21447	2.31471	1.84608	1.9739	1.45744	1.43968	1.35854	1.46239	1.29553	1.12181	1.14129	1.20178	1.0041	1.12509	1.29123	0.985739	1.55265	1.56879
simsample476	-61.15	5621780	3.43056	2.48325	0.0040224	0.0040224	6.08901	5.69136	0.119044	5	3.2096	3.04511	3.40498	3.34973	3.70899	3.94523	3.47981	3.59493	3.52631	2.90911	3.85642	3.78801	3.72474	3.65569	3.88815	4.11715	2.25001	2.39573	3.00968	2.44738	1.71373	2.16929	2.27936	1.80483	1.93377	1.41986	1.40901	1.32493	1.43038	1.25927	1.0832	1.09684	1.15813	0.963575	1.08231	1.24531	0.935301	1.48147	1.49881
simsample477	-47.3	4841160	3.37388	2.71394	0.00384124	0.00384124	6.05592	5.70961	0.0808714	5	3.61669	3.52126	3.81281	3.71364	4.2276	4.33269	3.94736	4.05657	3.93744	3.3633	4.36854	4.18027	4.18479	4.01912	4.36302	4.49281	2.37234	2.47458	3.1386	2.53082	1.8096	2.28799	2.37563	1.88045	2.01166	1.48166	1.45624	1.37779	1.48253	1.3143	1.13871	1.1631	1.22435	1.0211	1.14637	1.30894	1.00132	1.58988	1.59787
simsample478	-48	4367820	3.34849	2.80759	0.00385628	0.00385628	5.69435	5.96707	0.0841901	5	3.55066	3.44261	3.73718	3.65144	4.14007	4.25647	3.86912	3.97324	3.86305	3.29412	4.27832	4.11066	4.10934	3.95742	4.27977	4.42363	2.3603	2.46514	3.11509	2.51408	1.79973	2.2701	2.3628	1.87652	2.00496	1.47843	1.45376	1.37506	1.47547	1.31007	1.13696	1.16209	1.21965	1.01975	1.14459	1.30598	1.00085	1.5816	1.59076
simsample479	-57.55	4924230	3.40816	2.85969	0.0040258	0.0040258	5.80828	5.78787	0.107757	5	3.23952	3.09591	3.42847	3.37509	3.75844	3.95707	3.52052	3.6274	3.54598	2.96498	3.87493	3.78561	3.74163	3.65767	3.8957	4.09478	2.25092	2.38091	2.98058	2.42786	1.7212	2.17049	2.26929	1.80338	1.92835	1.42538	1.41082	1.32858	1.43075	1.26223	1.08842	1.10552	1.16522	0.972348	1.08894	1.24585	0.945236	1.48747	1.50275
simsample480	-51.05	4426750	3.36059	2.76324	0.0038768	0.0038768	5.85173	6.08871	0.0908811	5	3.49952	3.38872	3.69894	3.61846	4.08032	4.22014	3.81091	3.91444	3.81223	3.23258	4.21245	4.06513	4.05156	3.9165	4.21715	4.38216	2.35503	2.4682	3.11433	2.51977	1.79734	2.26898	2.36349	1.87591	2.00651	1.47854	1.45494	1.37359	1.47807	1.3091	1.13322	1.15619	1.21616	1.01446	1.1396	1.30231	0.994903	1.57276	1.5864
simsample481	-52.9	4236080	3.31736	2.75612	0.00393468	0.00393468	5.8015	5.97638	0.109564	5	3.30843	3.15829	3.50359	3.45734	3.85504	4.04969	3.58791	3.69917	3.62072	3.01957	3.94545	3.85754	3.80592	3.72686	3.96711	4.18228	2.30671	2.44539	3.05315	2.488	1.7625	2.22125	2.32836	1.86138	1.99207	1.47144	1.45986	1.37543	1.48038	1.30815	1.13161	1.14883	1.2089	1.01008	1.13145	1.3012	0.988955	1.5585	1.57659
simsample482	-50.3	4447970	3.35018	2.75504	0.00388437	0.00388437	5.85215	5.86268	0.0834043	5	3.53339	3.43575	3.72452	3.63246	4.12472	4.23279	3.84985	3.95235	3.85199	3.28084	4.25912	4.08286	4.08639	3.93019	4.25353	4.39283	2.3396	2.44702	3.09527	2.49703	1.78717	2.26314	2.35232	1.86303	1.99506	1.46817	1.44523	1.3663	1.469	1.30333	1.12875	1.151	1.20791	1.00961	1.13387	1.29445	0.99154	1.56807	1.57629
simsample483	-47.05	4383050	3.33673	2.77215	0.00387021	0.00387021	5.64363	5.90544	0.0904073	5	3.50632	3.39569	3.7031	3.62634	4.09748	4.22717	3.82573	3.92286	3.81891	3.23271	4.20206	4.0583	4.04795	3.91459	4.218	4.37811	2.35589	2.47375	3.11904	2.52258	1.79949	2.27155	2.36504	1.88129	2.01292	1.4851	1.46301	1.38412	1.48774	1.31996	1.14324	1.16509	1.22448	1.02109	1.14351	1.30706	1.00164	1.58226	1.59596
simsample484	-53.3	4177820	3.29878	2.77799	0.00394035	0.00394035	5.93437	5.84022	0.112934	5	3.25824	3.10615	3.45571	3.41891	3.79629	3.99972	3.53339	3.64265	3.5701	2.96655	3.87911	3.81005	3.75207	3.67789	3.905	4.11796	2.28665	2.43085	3.02757	2.47128	1.75183	2.20383	2.31802	1.86039	1.98757	1.47014	1.45458	1.37039	1.47415	1.30363	1.12969	1.14546	1.20528	1.00908	1.13211	1.30132	0.987786	1.55438	1.57425
simsample485	-53.5	4377630	3.31809	2.60585	0.00395368	0.00395368	5.7634	5.88489	0.108907	5	3.31562	3.1691	3.50966	3.45659	3.86104	4.05119	3.59517	3.70288	3.62228	3.02095	3.96635	3.87287	3.82792	3.73777	3.98569	4.19559	2.29661	2.43661	3.05418	2.47894	1.75195	2.21452	2.32427	1.85196	1.98372	1.46044	1.44554	1.3628	1.46783	1.29766	1.12416	1.14092	1.19984	1.00011	1.12451	1.29311	0.981774	1.5519	1.57221
simsample486	-51.35	4301350	3.30682	2.76805	0.00388694	0.00388694	6.08869	5.70399	0.095165	5	3.43325	3.31163	3.633	3.56611	4.01406	4.16139	3.73996	3.84268	3.74616	3.16077	4.10731	3.98243	3.96069	3.84064	4.12171	4.29542	2.32936	2.4542	3.08788	2.50616	1.7874	2.2535	2.35148	1.8773	2.00605	1.48053	1.45957	1.37703	1.47905	1.313	1.13946	1.16171	1.22329	1.02169	1.14625	1.31295	1.00423	1.58275	1.5951
simsample487	-51.8	4567610	3.3456	2.73983	0.00394841	0.00394841	5.7831	5.84641	0.113045	5	3.28058	3.12781	3.47532	3.43297	3.82039	4.03324	3.56551	3.67688	3.60129	2.99333	3.91731	3.84251	3.78448	3.70756	3.93988	4.16544	2.30528	2.44414	3.05252	2.48725	1.75883	2.21613	2.32482	1.85753	1.98616	1.4679	1.45245	1.36634	1.47156	1.29907	1.12445	1.14204	1.20391	1.00431	1.12671	1.29387	0.981871	1.54867	1.56605
simsample488	-50.1	5132190	3.40728	2.59336	0.00386819	0.00386819	6.06943	5.97357	0.095727	5	3.54423	3.4181	3.74452	3.65569	4.11746	4.28124	3.85103	3.96496	3.86803	3.25987	4.27089	4.12786	4.10884	3.9766	4.27885	4.45714	2.38375	2.50896	3.17192	2.55942	1.81099	2.29467	2.39203	1.88928	2.02584	1.48735	1.47082	1.38836	1.49072	1.32006	1.13758	1.16021	1.22386	1.0167	1.14245	1.30903	0.993036	1.57788	1.58588
simsample489	-52.85	4329230	3.33412	2.76221	0.00390276	0.00390276	5.86818	5.90364	0.0928717	5	3.4441	3.32887	3.64508	3.56594	4.02045	4.15738	3.74835	3.85047	3.75184	3.17212	4.13383	4.00195	3.98347	3.85508	4.14708	4.31725	2.32806	2.44492	3.07575	2.49126	1.77469	2.23957	2.33588	1.86172	1.99091	1.46716	1.44726	1.3649	1.46844	1.30367	1.12994	1.15087	1.21278	1.0115	1.13593	1.29805	0.99272	1.56519	1.57813
simsample490	-56.55	4491140	3.33784	2.67749	0.00398536	0.00398536	5.78958	5.8218	0.109818	5	3.27035	3.12842	3.46762	3.41575	3.80574	4.00202	3.54917	3.65319	3.57871	2.98254	3.9094	3.82382	3.77259	3.68842	3.92944	4.13758	2.27413	2.41269	3.01873	2.45587	1.7377	2.19678	2.30368	1.83651	1.96117	1.44631	1.43081	1.34734	1.45005	1.28146	1.10889	1.12299	1.18389	0.989146	1.1084	1.2725	0.966469	1.52943	1.54795
simsample491	-53.1	4453690	3.36997	2.79996	0.00390179	0.00390179	5.98628	6.15045	0.0962995	5	3.447	3.31681	3.64436	3.56967	4.01538	4.17247	3.75419	3.85849	3.76489	3.17725	4.1377	4.01489	3.98541	3.86747	4.1498	4.33385	2.34827	2.47198	3.106	2.51817	1.78928	2.25864	2.35594	1.87042	1.99998	1.47479	1.45494	1.37397	1.47684	1.30712	1.1318	1.15216	1.21124	1.01229	1.13608	1.29951	0.991449	1.56114	1.57715
simsample492	-62.25	5612220	3.42843	2.46563	0.0040224	0.0040224	6.1126	5.70639	0.122465	5	3.17643	3.00976	3.37348	3.319	3.6677	3.91634	3.44107	3.55393	3.48932	2.87054	3.80405	3.74215	3.67984	3.61661	3.83937	4.07826	2.23793	2.39138	3.00012	2.43774	1.70395	2.16314	2.27513	1.79934	1.92975	1.41424	1.40715	1.32237	1.42447	1.25436	1.07834	1.09074	1.15005	0.955177	1.07383	1.23895	0.929277	1.47656	1.49507
simsample493	-52.45	4465460	3.34766	2.71285	0.00392607	0.00392607	5.84264	5.9039	0.0968994	5	3.40702	3.28349	3.6034	3.53098	3.9728	4.13057	3.70937	3.81276	3.72397	3.13356	4.09035	3.96669	3.93968	3.82567	4.10832	4.28205	2.31267	2.435	3.06542	2.48144	1.7613	2.22374	2.32026	1.84692	1.97687	1.45733	1.43988	1.35843	1.46084	1.29243	1.11939	1.14111	1.2027	1.0023	1.12639	1.2907	0.983404	1.55389	1.56412
simsample494	-55.95	4904310	3.38985	2.91026	0.00405219	0.00405219	5.72411	5.71045	0.123142	5	3.12319	2.95455	3.3197	3.28494	3.61935	3.86094	3.38481	3.50004	3.43582	2.83656	3.71866	3.67701	3.60641	3.55659	3.75004	3.99291	2.24634	2.39315	2.9673	2.43269	1.71424	2.15522	2.26765	1.81413	1.93744	1.43552	1.42444	1.34092	1.44112	1.26955	1.09627	1.1092	1.16768	0.975214	1.09239	1.25402	0.949722	1.48583	1.50755
simsample495	-49.75	4395950	3.34612	2.78622	0.00391516	0.00391516	5.6633	5.92781	0.0946097	5	3.42961	3.30767	3.62355	3.55579	4.00149	4.14587	3.73432	3.845	3.75165	3.16783	4.12083	3.98971	3.96507	3.84497	4.13167	4.30033	2.32436	2.44064	3.06946	2.48682	1.77204	2.23596	2.33266	1.85619	1.98427	1.46549	1.44363	1.36266	1.4645	1.29901	1.12606	1.14624	1.20709	1.00889	1.13224	1.2953	0.98833	1.55836	1.5727
simsample496	-54.45	4951800	3.41024	2.76979	0.00394618	0.00394618	5.96589	5.91023	0.0999217	5	3.37985	3.24581	3.56926	3.49493	3.91897	4.09532	3.66983	3.77973	3.69121	3.10199	4.05341	3.93696	3.91382	3.79809	4.07	4.25789	2.30494	2.42793	3.05644	2.477	1.76025	2.22519	2.32005	1.8393	1.96734	1.44746	1.43039	1.34955	1.45179	1.28374	1.10869	1.12554	1.18379	0.986711	1.10675	1.26657	0.960631	1.51577	1.53071
simsample497	-51.8	4461750	3.32323	2.64743	0.00397289	0.00397289	5.71598	5.84398	0.119675	5	3.21849	3.05082	3.41551	3.37648	3.73917	3.96908	3.49086	3.60363	3.53549	2.92466	3.84328	3.78682	3.71817	3.6556	3.8664	4.09821	2.27652	2.42827	3.0251	2.47116	1.73978	2.19657	2.31109	1.85002	1.97954	1.45918	1.44758	1.36058	1.46611	1.29324	1.11827	1.13218	1.19213	0.996237	1.11721	1.28544	0.973688	1.53285	1.55526
simsample498	-54.2	5638450	3.43403	2.49733	0.00396723	0.00396723	5.87979	5.66814	0.106097	5	3.35126	3.21136	3.55008	3.47518	3.88209	4.07685	3.6413	3.75395	3.67444	3.06859	4.04349	3.92851	3.89362	3.7904	4.05992	4.2613	2.29027	2.42017	3.0563	2.47191	1.74045	2.21198	2.31229	1.82546	1.9565	1.43417	1.41787	1.33658	1.44014	1.27046	1.09286	1.11083	1.1705	0.973605	1.09302	1.25388	0.943721	1.50168	1.51474
simsample499	-49.8	4213270	3.32811	2.82726	0.00385591	0.00385591	6.00436	6.02759	0.0871896	5	3.54795	3.43536	3.74045	3.65859	4.1416	4.2557	3.85863	3.95845	3.85155	3.27967	4.25613	4.09548	4.09079	3.95433	4.26531	4.41762	2.37629	2.48842	3.13614	2.53929	1.81822	2.29635	2.38843	1.90017	2.02942	1.49651	1.47363	1.39263	1.49578	1.32872	1.152	1.17485	1.23538	1.03443	1.15867	1.32287	1.01403	1.59939	1.61231
simsample500	-49.05	4348500	3.34357	2.81532	0.00388731	0.00388731	5.67546	5.9194	0.0893994	5	3.47474	3.36616	3.66889	3.59442	4.06069	4.19294	3.79105	3.88971	3.79005	3.21563	4.17721	4.02606	4.01546	3.88392	4.18125	4.33933	2.33657	2.44727	3.08262	2.4939	1.78197	2.25153	2.34526	1.86155	1.99396	1.46968	1.44668	1.36671	1.4669	1.30009	1.12747	1.14985	1.21017	1.01112	1.13421	1.29533	0.991935	1.56382	1.57595
[truncated: 1,423 more columns]
